# Supplementary material for: Comparative SILAC Proteomic Analysis of Trypanosoma brucei Bloodstream and Procyclic Lifecycle Stages
Source: PLoS One. 2012 May 4;7(5):e36619. doi: 10.1371/journal.pone.0036619 (PMC3344917; doi:10.1371/journal.pone.0036619)
Supplement: Table S1 — Comparative proteomic data. (XLS) [file pone.0036619.s001.xls]

## Sheet: Sheet1
Table S1. Comparative proteomic data
Trypanosoma brucei procyclic form (R6K6) mixed 1:1 with bloodstream form (R0K0), fractionated by SDS-PAGE or SCX chromatography, analyzed by LC-MS/MS, and data processed by MaxQuant.
Protein IDs	Proteins	Unique Peptide Counts	Majority protein GeneBD ID	GeneDB Protein Descriptions	Unique Peptides	Unique Sequence Coverage [%]	Mol. Weight [kDa]	Sequence Length	Fold-change Pcf/Bsf	Fold-change Pcf/Bsf Variability [%]	Log2 Fold-change
>GeneDB|Tb927.6.3620 | organism=Trypanosoma_brucei_TREU927 | product=zinc finger protein, putative | location=Tb927_06_v4:1080058-1081329(-) | length=423	1	1	Tb927.6.3620	zinc finger protein, putative	1	2.1	47.872	423	0.008127	133.94	-6.94306
>GeneDB|Tb927.3.290 | organism=Trypanosoma_brucei_TREU927 | product=expression site-associated gene (ESAG, pseudogene), putative,expression site-associated gene 3 (ESAG3), degenerate | location=Tb927_03_v4:51868-52860(+) | length=331	1	1	Tb927.3.290	expression site-associated gene (ESAG, pseudogene), putative,expression site-associated gene 3 (ESAG3), degenerate	1	5.4	36.82	331	0.009201	188.57	-6.76399
>GeneDB|Tb09.142.0050 | organism=Trypanosoma_brucei_TREU927 | product=variant surface glycoprotein (VSG, pseudogene), putative | location=Tb927_09_v4:92457-94081(+) | length=540	1	2	Tb09.142.0050	variant surface glycoprotein (VSG, pseudogene), putative	2	1.9	57.255	540	0.009526	226.83	-6.71391
>GeneDB|Tb927.7.6860 | organism=Trypanosoma_brucei_TREU927 | product=expression site-associated gene (ESAG) protein, putative,expression site-associated gene 5 (ESAG5) protein, putative | location=Tb927_07_v4:1929788-1931230(+) | length=480	1	3	Tb927.7.6860	expression site-associated gene (ESAG) protein, putative,expression site-associated gene 5 (ESAG5) protein, putative	3	7.1	52.027	480	0.01323	100.51	-6.24004
>GeneDB|Tb927.6.2300 | organism=Trypanosoma_brucei_TREU927 | product=adenosine kinase, putative | location=Tb927_06_v4:718416-719453(+) | length=345	1	1	Tb927.6.2300	adenosine kinase, putative	1	8.1	37.908	345	0.014263	78.086	-6.13158
>GeneDB|Tb927.2.3340 | organism=Trypanosoma_brucei_TREU927 | product=hypothetical protein | location=Tb927_02_v4:619514-620161(-) | length=215	1	2	Tb927.2.3340	hypothetical protein	2	17.7	23.403	215	0.015961	32.327	-5.96931
>GeneDB|Tb927.5.860 | organism=Trypanosoma_brucei_TREU927 | product=selenoprotein, putative | location=Tb927_05_v4:294239-295018(+) | length=259	1	3	Tb927.5.860	selenoprotein, putative	3	13.1	28.792	259	0.016389	238.4	-5.93113
>GeneDB|Tb927.7.6600 | organism=Trypanosoma_brucei_TREU927 | product=hypothetical protein, conserved | location=Tb927_07_v4:1803754-1804560(-) | length=268	1	3	Tb927.7.6600	hypothetical protein, conserved	3	15.7	29.311	268	0.01667	112.99	-5.9066
>GeneDB|Tb927.8.5050 | organism=Trypanosoma_brucei_TREU927 | product=hypothetical protein, conserved | location=Tb927_08_v4:1491897-1494137(+) | length=746	1	5	Tb927.8.5050	hypothetical protein, conserved	5	11	80.96	746	0.017334	153.27	-5.85025
>GeneDB|Tb927.8.390 | organism=Trypanosoma_brucei_TREU927 | product=expression site-associated gene (ESAG, pseudogene), putative,expression site-associated gene 3 (ESAG3), degenerate | location=Tb927_08_v4:105019-106005(+) | length=329	1	1	Tb927.8.390	expression site-associated gene (ESAG, pseudogene), putative,expression site-associated gene 3 (ESAG3), degenerate	1	5.5	35.619	329	0.017624	46.421	-5.82631
>GeneDB|Tb927.10.8440 | organism=Trypanosoma_brucei_TREU927 | product=glucose transporter 1B | location=Tb927_10_v5:2093459-2095042(+) | length=527;>GeneDB|Tb927.10.8460 | organism=Trypanosoma_brucei_TREU927 | product=glucose transporter, putative | location=Tb927_10_v5:2098241-2099824(+) | length=527;>GeneDB|Tb927.10.8470 | organism=Trypanosoma_brucei_TREU927 | product=glucose transporter, putat…	4	1;0;0;0	Tb927.10.8440	glucose transporter 1B	1	2.1	56.479	527	0.020386	181	-5.61628
>GeneDB|Tb927.3.5660 | organism=Trypanosoma_brucei_TREU927 | product=UDP-Gal or UDP-GlcNAc-dependent glycosyltransferase, putative | location=Tb927_03_v4:1580707-1581873(+) | length=388	1	6	Tb927.3.5660	UDP-Gal or UDP-GlcNAc-dependent glycosyltransferase, putative	6	22.2	45.73	388	0.023216	150.36	-5.42874
>GeneDB|Tb11.47.0026 | organism=Trypanosoma_brucei_TREU927 | product=hypothetical protein, conserved | location=Tb927_11_01_v4:350886-352232(+) | length=448	1	2	Tb11.47.0026	hypothetical protein, conserved	2	7.4	53.366	448	0.024127	145.33	-5.37321
>GeneDB|Tb927.10.7090 | organism=Trypanosoma_brucei_TREU927 | product=alternative oxidase | location=Tb927_10_v5:1783506-1784495(+) | length=329;REV__>GeneDB|Tb927.5.910 | organism=Trypanosoma_brucei_TREU927 | product=oligosaccharyl transferase subunit, putative | location=Tb927_05_v4:303684-306149(+) | length=821;REV__>GeneDB|Tb11.01.5330 | organism=Trypanosoma_brucei_TREU927 | product=hypotheti…	3	25;1;1	Tb927.10.7090	alternative oxidase	25	70.5	37.59	329	0.025961	96.445	-5.26751
>GeneDB|Tb927.10.14890 | organism=Trypanosoma_brucei_TREU927 | product=C-terminal motor kinesin, putative | location=Tb927_10_v5:3633146-3635608(+) | length=820;>GeneDB|Tb927.7.4830 | organism=Trypanosoma_brucei_TREU927 | product=kinesin, putative | location=Tb927_07_v4:1272044-1273594(-) | length=516;REV__CON__Q497I4;REV__>CON_Q497I4 Tax_Id=10090 Gene_Symbol=Krt35 Krt35 protein	4	63;1;1;1	Tb927.10.14890	C-terminal motor kinesin, putative	63	79.9	90.8	820	0.02625	98.107	-5.25154
>GeneDB|Tb927.10.2440 | organism=Trypanosoma_brucei_TREU927 | product=metacaspase MCA4,cysteine peptidase, Clan CD, family C13, putative | location=Tb927_10_v5:630862-631923(-) | length=353	1	12	Tb927.10.2440	metacaspase MCA4,cysteine peptidase, Clan CD, family C13, putative	12	67.4	38.969	353	0.028539	116.99	-5.13092
>GeneDB|Tb927.8.5080 | organism=Trypanosoma_brucei_TREU927 | product=hypothetical protein, conserved | location=Tb927_08_v4:1498758-1500545(+) | length=595	1	2	Tb927.8.5080	hypothetical protein, conserved	2	8.7	65.43	595	0.029148	153.62	-5.10046
>GeneDB|Tb08.27P2.160 | organism=Trypanosoma_brucei_TREU927 | product=expression site-associated gene (ESAG, pseudogene), putative,expression site-associated gene 3 (ESAG3), degenerate,BAC from homologous region on chr8 | location=Tbrucei.chr8.100:22974-24068(-) | length=364;>GeneDB|Tb927.1.5340 | organism=Trypanosoma_brucei_TREU927 | product=expression site-associated gene (ESAG, pseudogene), pu…	27	1;0;0;0;0;0;0;0;0;0;0;0;0;0;0;0;0;0;0;0;0;0;0;0;0;0;0	Tb08.27P2.160	expression site-associated gene (ESAG, pseudogene), putative,expression site-associated gene 3 (ESAG3), degenerate,BAC from homologous region on chr8	1	4.7	41.846	364	0.031117	245.77	-5.00615
>GeneDB|Tb09.211.2410 | organism=Trypanosoma_brucei_TREU927 | product=protein kinase A catalytic subunit isoform 1,protein kinase A catalytic subunit | location=Tb927_09_v4:1700632-1701636(-) | length=334	1	2	Tb09.211.2410	protein kinase A catalytic subunit isoform 1,protein kinase A catalytic subunit	2	8.7	38.039	334	0.032636	108.28	-4.93739
>GeneDB|Tb927.5.630 | organism=Trypanosoma_brucei_TREU927 | product=acidic phosphatase, putative | location=Tb927_05_v4:211143-212348(-) | length=401	1	16	Tb927.5.630	acidic phosphatase, putative	16	36.7	43.663	401	0.034064	133.68	-4.87561
>GeneDB|Tb927.5.310 | organism=Trypanosoma_brucei_TREU927 | product=hypothetical protein | location=Tb927_05_v4:77057-78280(-) | length=407	1	4	Tb927.5.310	hypothetical protein	4	15	44.533	407	0.038747	135.32	-4.68977
>GeneDB|Tb927.8.2780 | organism=Trypanosoma_brucei_TREU927 | product=RNA-binding protein RBP10, putative | location=Tb927_08_v4:828598-829518(+) | length=306	1	5	Tb927.8.2780	RNA-binding protein RBP10, putative	5	28.4	32.195	306	0.039036	150.87	-4.67905
>GeneDB|Tb927.2.3320 | organism=Trypanosoma_brucei_TREU927 | product=65 kDa invariant surface glycoprotein | location=Tb927_02_v4:615766-617079(+) | length=437	1	5	Tb927.2.3320	65 kDa invariant surface glycoprotein	5	17.8	48.153	437	0.039622	144.43	-4.65755
>GeneDB|Tb927.4.4820 | organism=Trypanosoma_brucei_TREU927 | product=amino acid transporter 10, putative | location=Tb927_04_v4:1319221-1320693(-) | length=490;>GeneDB|Tb927.4.4840 | organism=Trypanosoma_brucei_TREU927 | product=amino acid transporter 7, putative | location=Tb927_04_v4:1323210-1324682(-) | length=490;>GeneDB|Tb927.4.4860 | organism=Trypanosoma_brucei_TREU927 | product=amino acid …	3	3;2;2	Tb927.4.4820	amino acid transporter 10, putative	3	12.2	52.838	490	0.042238	65.353	-4.56531
>GeneDB|Tb927.10.14160 | organism=Trypanosoma_brucei_TREU927 | product=aquaglyceroporin (small solute channel), putative | location=Tb927_10_v5:3440953-3441867(-) | length=304	1	5	Tb927.10.14160	aquaglyceroporin (small solute channel), putative	5	32.9	32.751	304	0.042633	126.07	-4.55189
>GeneDB|Tb927.1.700 | organism=Trypanosoma_brucei_TREU927 | product=phosphoglycerate kinase | location=Tb927_01_v4:231788-233110(-) | length=440	1	12	Tb927.1.700	phosphoglycerate kinase	12	30.7	47.245	440	0.042929	166.9	-4.5419
>GeneDB|Tb927.4.2380 | organism=Trypanosoma_brucei_TREU927 | product=sarcoplasmic reticulum glycoprotein, putative | location=Tb927_04_v4:613831-615705(+) | length=624	1	2	Tb927.4.2380	sarcoplasmic reticulum glycoprotein, putative	2	3.8	70.735	624	0.043826	52.595	-4.51207
>GeneDB|Tb927.3.4720 | organism=Trypanosoma_brucei_TREU927 | product=dynamin, putative,vacuolar sortin protein 1, putative | location=Tb927_03_v4:1334500-1336482(-) | length=660	1	8	Tb927.3.4720	dynamin, putative,vacuolar sortin protein 1, putative	8	14.2	73.321	660	0.04386	95.633	-4.51095
>GeneDB|Tb927.7.2650 | organism=Trypanosoma_brucei_TREU927 | product=hypothetical protein, conserved | location=Tb927_07_v4:680912-682525(-) | length=537;>REV_GeneDB|Tb09.211.1210 Reverse sequence, was | organism=Trypanosoma_brucei_TREU927 | product=RAD51/dmc1 protein, putative | location=Tb927_09_v4:1480812-1481861(-) | length=349;>REV_GeneDB|Tb927.4.970 Reverse sequence, was | organism=Trypanos…	3	24;1;1	Tb927.7.2650	hypothetical protein, conserved	24	35	62.171	537	0.046431	56.017	-4.42877
>GeneDB|Tb11.02.0730 | organism=Trypanosoma_brucei_TREU927 | product=metacaspase,cysteine peptidase, Clan CD, family C13 | location=Tb927_11_01_v4:894686-895804(-) | length=372	1	10	Tb11.02.0730	metacaspase,cysteine peptidase, Clan CD, family C13	10	34.4	40.18	372	0.046832	118.79	-4.41636
>GeneDB|Tb927.10.12820 | organism=Trypanosoma_brucei_TREU927 | product=hypothetical protein, conserved | location=Tb927_10_v5:3114222-3117263(-) | length=1013	1	32	Tb927.10.12820	hypothetical protein, conserved	32	48	110.24	1013	0.047111	136.72	-4.40779
>GeneDB|Tb11.01.0120 | organism=Trypanosoma_brucei_TREU927 | product=haloacid dehalogenase-like hydrolase, putative | location=Tb927_11_01_v4:2304836-2305699(+) | length=287	1	13	Tb11.01.0120	haloacid dehalogenase-like hydrolase, putative	13	63.4	31.585	287	0.047175	146.16	-4.40583
>GeneDB|Tb927.7.7510 | organism=Trypanosoma_brucei_TREU927 | product=hypothetical protein | location=Tb927_07_v4:2176304-2177041(+) | length=245	1	3	Tb927.7.7510	hypothetical protein	3	12.7	26.709	245	0.047859	84.064	-4.38507
>GeneDB|Tb927.8.8330 | organism=Trypanosoma_brucei_TREU927 | product=calpain, putative,cysteine peptidase, putative | location=Tb927_08_v4:2466411-2469077(+) | length=888	1	24	Tb927.8.8330	calpain, putative,cysteine peptidase, putative	24	34	98.456	888	0.050349	162.69	-4.31189
>GeneDB|Tb927.2.3280 | organism=Trypanosoma_brucei_TREU927 | product=65 kDa invariant surface glycoprotein | location=Tb927_02_v4:601594-602904(+) | length=436;>GeneDB|Tb927.2.3290 | organism=Trypanosoma_brucei_TREU927 | product=65 kDa invariant surface glycoprotein | location=Tb927_02_v4:605140-606450(+) | length=436;>GeneDB|Tb927.2.3300 | organism=Trypanosoma_brucei_TREU927 | product=65 kDa inv…	4	3;3;3;3	Tb927.2.3280	65 kDa invariant surface glycoprotein	3	5.7	48.281	436	0.050659	105.46	-4.30304
>GeneDB|Tb927.6.560 | organism=Trypanosoma_brucei_TREU927 | product=cysteine peptidase C (CPC),CPC cysteine peptidase, Clan CA, family C1, Cathepsin B-like | location=Tb927_06_v4:238156-239178(-) | length=340	1	4	Tb927.6.560	cysteine peptidase C (CPC),CPC cysteine peptidase, Clan CA, family C1, Cathepsin B-like	4	25.6	37.223	340	0.053622	71.306	-4.22103
>GeneDB|Tb11.02.4930 | organism=Trypanosoma_brucei_TREU927 | product=acidocalcisomal pyrophosphatase | location=Tb927_11_01_v4:1964135-1965379(-) | length=414	1	3	Tb11.02.4930	acidocalcisomal pyrophosphatase	3	14.3	47.296	414	0.057323	75.401	-4.12474
>GeneDB|Tb927.10.12010 | organism=Trypanosoma_brucei_TREU927 | product=hypothetical protein, conserved | location=Tb927_10_v5:2921123-2921518(+) | length=131	1	2	Tb927.10.12010	hypothetical protein, conserved	2	23.7	14.706	131	0.057685	90.178	-4.11566
>GeneDB|Tb927.10.5250 | organism=Trypanosoma_brucei_TREU927 | product=hypothetical protein, conserved,zinc finger protein family member, putative | location=Tb927_10_v5:1305467-1307434(+) | length=655	1	8	Tb927.10.5250	hypothetical protein, conserved,zinc finger protein family member, putative	8	17.9	72.04	655	0.057717	125.66	-4.11486
>GeneDB|Tb927.8.2260 | organism=Trypanosoma_brucei_TREU927 | product=hypothetical protein, conserved | location=Tb927_08_v4:692159-692758(+) | length=199;>GeneDB|Tb927.8.2280 | organism=Trypanosoma_brucei_TREU927 | product=hypothetical protein, conserved | location=Tb927_08_v4:695485-696084(+) | length=199	2	2;2	Tb927.8.2260	hypothetical protein, conserved	2	4.5	21.768	199	0.057811	18.051	-4.11251
>GeneDB|Tb927.2.6000 | organism=Trypanosoma_brucei_TREU927 | product=glycosylphosphatidylinositol-specific phospholipase C | location=Tb927_02_v4:1088353-1089429(+) | length=358	1	12	Tb927.2.6000	glycosylphosphatidylinositol-specific phospholipase C	12	49.4	40.662	358	0.058883	138.46	-4.08601
>GeneDB|Tb927.7.470 | organism=Trypanosoma_brucei_TREU927 | product=hypothetical protein | location=Tb927_07_v4:85425-86318(-) | length=297	1	9	Tb927.7.470	hypothetical protein	9	35.4	33.145	297	0.059154	119.49	-4.07938
>GeneDB|Tb927.8.2070 | organism=Trypanosoma_brucei_TREU927 | product=hypothetical protein, conserved | location=Tb927_08_v4:654365-654964(+) | length=199;>GeneDB|Tb927.8.2270 | organism=Trypanosoma_brucei_TREU927 | product=hypothetical protein, conserved | location=Tb927_08_v4:693822-694421(+) | length=199	2	2;0	Tb927.8.2070	hypothetical protein, conserved	2	11.1	21.799	199	0.060886	67.148	-4.03775
>GeneDB|Tb927.8.4060 | organism=Trypanosoma_brucei_TREU927 | product=flagellum-adhesion glycoprotein, putative | location=Tb927_08_v4:1206415-1208187(-) | length=590	1	2	Tb927.8.4060	flagellum-adhesion glycoprotein, putative	2	4.1	64.417	590	0.061341	56.445	-4.027
>GeneDB|Tb927.8.7820 | organism=Trypanosoma_brucei_TREU927 | product=hypothetical protein, conserved | location=Tb927_08_v4:2274966-2276480(+) | length=504	1	6	Tb927.8.7820	hypothetical protein, conserved	6	18.3	52.535	504	0.061362	124.81	-4.02651
>GeneDB|Tb09.211.3955 | organism=Trypanosoma_brucei_TREU927 | product=hypothetical protein, conserved,predicted heat shock factor binding protein | location=Tb927_09_v4:2018316-2018564(+) | length=82	1	6	Tb09.211.3955	hypothetical protein, conserved,predicted heat shock factor binding protein	6	90.2	9.2493	82	0.063591	57.85	-3.97503
>GeneDB|Tb927.7.300 | organism=Trypanosoma_brucei_TREU927 | product=UDP-Gal or UDP-GlcNAc-dependent glycosyltransferase, putative | location=Tb927_07_v4:54502-55605(+) | length=367	1	2	Tb927.7.300	UDP-Gal or UDP-GlcNAc-dependent glycosyltransferase, putative	2	15	43.144	367	0.065066	43.933	-3.94195
>GeneDB|Tb927.8.7970 | organism=Trypanosoma_brucei_TREU927 | product=hypothetical protein | location=Tb927_08_v4:2347985-2349469(+) | length=494	1	8	Tb927.8.7970	hypothetical protein	8	21.7	53.211	494	0.065106	70.691	-3.94107
>GeneDB|Tb11.01.3805 | organism=Trypanosoma_brucei_TREU927 | product=microtubule-associated protein,corset-associated protein 15 | location=Tb927_11_01_v4:3148808-3149173(+) | length=121	1	14	Tb11.01.3805	microtubule-associated protein,corset-associated protein 15	14	62	14.091	121	0.066355	114.4	-3.91365
>GeneDB|Tb927.8.8280 | organism=Trypanosoma_brucei_TREU927 | product=hypothetical protein, conserved | location=Tb927_08_v4:2451686-2452474(+) | length=262	1	9	Tb927.8.8280	hypothetical protein, conserved	9	30.9	30.098	262	0.068557	105.8	-3.86655
>GeneDB|Tb11.47.0031 | organism=Trypanosoma_brucei_TREU927 | product=protein kinase, putative,cdc2-related kinase, putative | location=Tb927_11_01_v4:338722-339699(+) | length=325;>GeneDB|Tb927.10.4990 | organism=Trypanosoma_brucei_TREU927 | product=cell division related protein kinase 2, putative,CDC2-related protein kinase | location=Tb927_10_v5:1238533-1239468(+) | length=311	2	4;1	Tb11.47.0031	protein kinase, putative,cdc2-related kinase, putative	4	17.8	36.728	325	0.069105	112.17	-3.85507
>GeneDB|Tb927.4.3480 | organism=Trypanosoma_brucei_TREU927 | product=hypothetical protein | location=Tb927_04_v4:902651-903202(-) | length=183	1	2	Tb927.4.3480	hypothetical protein	2	13.1	19.994	183	0.070244	123.93	-3.83148
>GeneDB|Tb927.10.9360 | organism=Trypanosoma_brucei_TREU927 | product=hypothetical protein, conserved | location=Tb927_10_v5:2317020-2318582(+) | length=520	1	15	Tb927.10.9360	hypothetical protein, conserved	15	39.6	57.475	520	0.071219	93.902	-3.81159
>GeneDB|Tb927.2.6220 | organism=Trypanosoma_brucei_TREU927 | product=adenosine transporter 2, putative | location=Tb927_02_v4:1128353-1129741(+) | length=462	1	3	Tb927.2.6220	adenosine transporter 2, putative	3	5.6	51.226	462	0.071392	159.27	-3.80809
>GeneDB|Tb927.7.3450 | organism=Trypanosoma_brucei_TREU927 | product=I/6 autoantigen | location=Tb927_07_v4:892569-893156(-) | length=195	1	4	Tb927.7.3450	I/6 autoantigen	4	33.3	21.585	195	0.071394	58.475	-3.80805
>GeneDB|Tb927.4.5310 | organism=Trypanosoma_brucei_TREU927 | product=serine/threonine-protein kinase a, putative,protein kinase, putative | location=Tb927_04_v4:1442332-1443654(-) | length=440;>GeneDB|Tb927.8.7110 | organism=Trypanosoma_brucei_TREU927 | product=serine/threonine-protein kinase a, putative,protein kinase, putative | location=Tb927_08_v4:2048672-2049994(+) | length=440	2	7;3	Tb927.4.5310	serine/threonine-protein kinase a, putative,protein kinase, putative	7	22.3	50.193	440	0.07491	106.32	-3.7387
>GeneDB|Tb927.5.4580 | organism=Trypanosoma_brucei_TREU927 | product=hypothetical protein, conserved | location=Tb927_05_v4:1363639-1366095(+) | length=818	1	2	Tb927.5.4580	hypothetical protein, conserved	2	2.4	88.633	818	0.076406	191.47	-3.71017
>GeneDB|Tb11.02.0010 | organism=Trypanosoma_brucei_TREU927 | product=hypothetical protein, conserved | location=Tb927_11_01_v4:668016-668672(+) | length=218	1	7	Tb11.02.0010	hypothetical protein, conserved	7	43.1	24.436	218	0.076652	108.46	-3.70553
>GeneDB|Tb927.1.3830 | organism=Trypanosoma_brucei_TREU927 | product=glucose-6-phosphate isomerase, glycosomal | location=Tb927_01_v4:816419-818242(+) | length=607	1	30	Tb927.1.3830	glucose-6-phosphate isomerase, glycosomal	30	58.6	67.614	607	0.079822	93.34	-3.64707
>GeneDB|Tb927.8.7940 | organism=Trypanosoma_brucei_TREU927 | product=receptor-type adenylate cyclase GRESAG 4, putative | location=Tb927_08_v4:2333202-2336954(+) | length=1250	1	4	Tb927.8.7940	receptor-type adenylate cyclase GRESAG 4, putative	4	5	138.49	1250	0.080386	74.066	-3.63691
>GeneDB|Tb927.3.3270 | organism=Trypanosoma_brucei_TREU927 | product=ATP-dependent phosphofructokinase | location=Tb927_03_v4:840818-842281(-) | length=487	1	50	Tb927.3.3270	ATP-dependent phosphofructokinase	50	84.4	53.517	487	0.080526	72.509	-3.6344
>GeneDB|Tb927.3.600 | organism=Trypanosoma_brucei_TREU927 | product=hypothetical protein | location=Tb927_03_v4:152524-153222(-) | length=232	1	1	Tb927.3.600	hypothetical protein	1	7.3	24.993	232	0.08068	14.678	-3.63165
>GeneDB|Tb927.3.4070 | organism=Trypanosoma_brucei_TREU927 | product=hypothetical protein, conserved | location=Tb927_03_v4:1148330-1150117(-) | length=585;>GeneDB|Tb927.3.4110 | organism=Trypanosoma_brucei_TREU927 | product=hypothetical protein, conserved | location=Tb927_03_v4:1158773-1160560(-) | length=595;>GeneDB|Tb927.3.4090 | organism=Trypanosoma_brucei_TREU927 | product=hypothetical prote…	3	4;0;0	Tb927.3.4070	hypothetical protein, conserved	4	9.1	64.326	585	0.08298	125.55	-3.59109
>GeneDB|Tb927.10.4780 | organism=Trypanosoma_brucei_TREU927 | product=GPI inositol deacylase precursor | location=Tb927_10_v5:1200608-1202284(-) | length=558	1	3	Tb927.10.4780	GPI inositol deacylase precursor	3	8.1	61.431	558	0.0836	106.22	-3.58035
>GeneDB|Tb927.10.4800 | organism=Trypanosoma_brucei_TREU927 | product=hypothetical protein, conserved | location=Tb927_10_v5:1205005-1206750(-) | length=581	1	2	Tb927.10.4800	hypothetical protein, conserved	2	6	65.511	581	0.084268	53.481	-3.56887
>GeneDB|Tb927.6.930 | organism=Trypanosoma_brucei_TREU927 | product=metacaspase MCA3,cysteine peptidase, Clan CD, family C13, putative | location=Tb927_06_v4:397410-398483(-) | length=357	1	1	Tb927.6.930	metacaspase MCA3,cysteine peptidase, Clan CD, family C13, putative	1	8.4	38.738	357	0.08591	55.864	-3.54103
>GeneDB|Tb927.5.5230 | organism=Trypanosoma_brucei_TREU927 | product=expression site-associated gene (ESAG, pseudogene), putative,expression site-associated gene (ESAG), degenerate | location=Tb927_05_v4:1569234-1570340(-) | length=368	1	2	Tb927.5.5230	expression site-associated gene (ESAG, pseudogene), putative,expression site-associated gene (ESAG), degenerate	2	4.9	41.412	368	0.086597	71.399	-3.52954
>GeneDB|Tb927.1.5060 | organism=Trypanosoma_brucei_TREU927 | product=variant surface glycoprotein (VSG)-related, putative | location=Tb927_01_v4:1013265-1014302(+) | length=345	1	2	Tb927.1.5060	variant surface glycoprotein (VSG)-related, putative	2	8.1	38.176	345	0.087932	46.542	-3.50747
>GeneDB|Tb927.8.4890 | organism=Trypanosoma_brucei_TREU927 | product=endoplasmic reticulum oxidoreductin, putative,pol-associated gene 1 | location=Tb927_08_v4:1441928-1443256(-) | length=442	1	11	Tb927.8.4890	endoplasmic reticulum oxidoreductin, putative,pol-associated gene 1	11	28.7	49.202	442	0.095762	52.006	-3.3844
>GeneDB|Tb927.10.8230 | organism=Trypanosoma_brucei_TREU927 | product=protein disulfide isomerase,bloodstream- specific protein 2 precursor | location=Tb927_10_v5:2043299-2044792(-) | length=497	1	24	Tb927.10.8230	protein disulfide isomerase,bloodstream- specific protein 2 precursor	24	50.3	55.579	497	0.096764	71.76	-3.36939
>GeneDB|Tb11.02.2470 | organism=Trypanosoma_brucei_TREU927 | product=hypothetical protein, conserved | location=Tb927_11_01_v4:1370060-1371460(+) | length=466	1	14	Tb11.02.2470	hypothetical protein, conserved	14	46.1	52.008	466	0.097274	60.114	-3.3618
>GeneDB|Tb927.8.8150 | organism=Trypanosoma_brucei_TREU927 | product=hypothetical protein, conserved | location=Tb927_08_v4:2410660-2411208(+) | length=182	1	6	Tb927.8.8150	hypothetical protein, conserved	6	42.9	19.746	182	0.099236	58.924	-3.33299
>GeneDB|Tb927.5.890 | organism=Trypanosoma_brucei_TREU927 | product=oligosaccharyl transferase subunit, putative | location=Tb927_05_v4:297084-299489(+) | length=801;>GeneDB|Tb927.5.880 | organism=Trypanosoma_brucei_TREU927 | product=hypothetical protein, conserved | location=Tb927_05_v4:296407-296676(+) | length=89	2	9;0	Tb927.5.890	oligosaccharyl transferase subunit, putative	9	13.6	89.347	801	0.099872	143.64	-3.32378
>GeneDB|Tb11.02.5630 | organism=Trypanosoma_brucei_TREU927 | product=MSP-A, putative | location=Tb927_11_01_v4:2136486-2138171(-) | length=561	1	1	Tb11.02.5630	MSP-A, putative	1	2.1	61.833	561	0.099968	84.317	-3.32239
>GeneDB|Tb927.7.7520 | organism=Trypanosoma_brucei_TREU927 | product=receptor-type adenylate cyclase GRESAG 4, putative | location=Tb927_07_v4:2180395-2184126(+) | length=1243;>GeneDB|Tb927.7.7530 | organism=Trypanosoma_brucei_TREU927 | product=receptor-type adenylate cyclase GRESAG 4, putative | location=Tb927_07_v4:2187783-2191514(+) | length=1243	2	7;7	Tb927.7.7520	receptor-type adenylate cyclase GRESAG 4, putative	7	9.8	137.88	1243	0.10055	78.4	-3.31402
>GeneDB|Tb927.8.8030 | organism=Trypanosoma_brucei_TREU927 | product=hypothetical protein, conserved | location=Tb927_08_v4:2380374-2380991(+) | length=205	1	3	Tb927.8.8030	hypothetical protein, conserved	3	19.5	23.067	205	0.10116	45.178	-3.30529
>GeneDB|Tb09.v1.0650 | organism=Trypanosoma_brucei_TREU927 | product=hypothetical protein, conserved | location=Tb927_09_v4:1739566-1741251(+) | length=561	1	8	Tb09.v1.0650	hypothetical protein, conserved	8	20.9	62.488	561	0.10518	83.46	-3.24907
>GeneDB|Tb927.8.8140 | organism=Trypanosoma_brucei_TREU927 | product=small GTP-binding rab protein, putative | location=Tb927_08_v4:2406019-2407917(+) | length=632	1	3	Tb927.8.8140	small GTP-binding rab protein, putative	3	6.6	68.285	632	0.10705	101.2	-3.22364
>GeneDB|Tb927.4.3400 | organism=Trypanosoma_brucei_TREU927 | product=hypothetical protein, conserved | location=Tb927_04_v4:886670-888487(-) | length=605	1	11	Tb927.4.3400	hypothetical protein, conserved	11	26.1	66.689	605	0.10737	138.49	-3.21934
>GeneDB|Tb927.10.7300 | organism=Trypanosoma_brucei_TREU927 | product=hypothetical protein, conserved | location=Tb927_10_v5:1844023-1844310(-) | length=95	1	3	Tb927.10.7300	hypothetical protein, conserved	3	46.3	10.695	95	0.10809	61.051	-3.2097
>GeneDB|Tb927.10.13790 | organism=Trypanosoma_brucei_TREU927 | product=hypothetical protein, conserved | location=Tb927_10_v5:3367889-3369931(-) | length=680	1	33	Tb927.10.13790	hypothetical protein, conserved	33	55.7	74.674	680	0.10903	71.844	-3.1972
>GeneDB|Tb09.160.2420 | organism=Trypanosoma_brucei_TREU927 | product=syntaxin, putative | location=Tb927_09_v4:704041-704895(+) | length=284	1	8	Tb09.160.2420	syntaxin, putative	8	41.2	31.106	284	0.10907	69.066	-3.19667
>GeneDB|Tb927.1.1500 | organism=Trypanosoma_brucei_TREU927 | product=hypothetical protein, conserved | location=Tb927_01_v4:374878-376872(+) | length=664	1	5	Tb927.1.1500	hypothetical protein, conserved	5	9.8	73.618	664	0.11137	115.74	-3.16657
>GeneDB|Tb927.10.4260 | organism=Trypanosoma_brucei_TREU927 | product=hypothetical protein, conserved | location=Tb927_10_v5:1113513-1114925(+) | length=470	1	1	Tb927.10.4260	hypothetical protein, conserved	1	3.4	52.328	470	0.11222	16.716	-3.1556
>GeneDB|Tb927.8.5140 | organism=Trypanosoma_brucei_TREU927 | product=diacylglycerol kinase, putative | location=Tb927_08_v4:1532194-1533921(+) | length=575	1	5	Tb927.8.5140	diacylglycerol kinase, putative	5	11.3	62.699	575	0.11632	101.85	-3.10383
>GeneDB|Tb927.5.1990 | organism=Trypanosoma_brucei_TREU927 | product=hypothetical protein, conserved | location=Tb927_05_v4:615801-616805(+) | length=334	1	3	Tb927.5.1990	hypothetical protein, conserved	3	12.3	39.673	334	0.12038	122.46	-3.05433
>GeneDB|Tb927.7.5790 | organism=Trypanosoma_brucei_TREU927 | product=protein disulfide isomerase, putative | location=Tb927_07_v4:1562540-1562947(+) | length=135;>GeneDB|Tb08.27P2.290 | organism=Trypanosoma_brucei_TREU927 | product=variant surface glycoprotein (VSG, atypical), putative,BAC from homologous region on chr8 | location=Tbrucei.chr8.100:51710-53263(-) | length=517	2	7;1	Tb927.7.5790	protein disulfide isomerase, putative	7	44.4	15.401	135	0.12085	20.936	-3.04871
>GeneDB|Tb09.211.0450 | organism=Trypanosoma_brucei_TREU927 | product=hypothetical protein, conserved | location=Tb927_09_v4:1337129-1337593(-) | length=154	1	1	Tb09.211.0450	hypothetical protein, conserved	1	9.1	16.987	154	0.12538	20.813	-2.99562
>GeneDB|Tb06.3A7.960 | organism=Trypanosoma_brucei_TREU927 | product=hypothetical protein | location=Tb927_06_v4:484320-485252(+) | length=310	1	2	Tb06.3A7.960	hypothetical protein	2	8.7	34.146	310	0.12653	76.563	-2.98245
>GeneDB|Tb927.10.3660 | organism=Trypanosoma_brucei_TREU927 | product=aspartate aminotransferase | location=Tb927_10_v5:952856-954067(-) | length=403	1	30	Tb927.10.3660	aspartate aminotransferase	30	74.7	44.787	403	0.12654	68.104	-2.98233
>GeneDB|Tb09.160.4760 | organism=Trypanosoma_brucei_TREU927 | product=hypothetical protein | location=Tb927_09_v4:1021910-1024975(+) | length=1021	1	17	Tb09.160.4760	hypothetical protein	17	23.3	113.29	1021	0.12819	106	-2.96364
>GeneDB|Tb11.01.7530 | organism=Trypanosoma_brucei_TREU927 | product=hypothetical protein, conserved | location=Tb927_11_01_v4:4145055-4146209(-) | length=384	1	9	Tb11.01.7530	hypothetical protein, conserved	9	29.4	42.433	384	0.1283	49.645	-2.96241
>GeneDB|Tb927.8.4360 | organism=Trypanosoma_brucei_TREU927 | product=hypothetical protein, conserved | location=Tb927_08_v4:1297279-1301385(-) | length=1368	1	2	Tb927.8.4360	hypothetical protein, conserved	2	2.7	151.5	1368	0.12928	135.24	-2.95143
>GeneDB|Tb927.10.5620 | organism=Trypanosoma_brucei_TREU927 | product=fructose-bisphosphate aldolase, glycosomal | location=Tb927_10_v5:1404259-1405377(+) | length=372	1	45	Tb927.10.5620	fructose-bisphosphate aldolase, glycosomal	45	92.2	41.071	372	0.13034	61.239	-2.93965
>GeneDB|Tb927.8.1200 | organism=Trypanosoma_brucei_TREU927 | product=vacuolar-type Ca2 -ATPase 2 | location=Tb927_08_v4:382249-385491(-) | length=1080	1	3	Tb927.8.1200	vacuolar-type Ca2 -ATPase 2	3	4.4	119	1080	0.13037	89.316	-2.93932
>GeneDB|Tb927.2.3880 | organism=Trypanosoma_brucei_TREU927 | product=heterogeneous nuclear ribonucleoprotein H/F, putative | location=Tb927_02_v4:686755-688218(-) | length=487	1	12	Tb927.2.3880	heterogeneous nuclear ribonucleoprotein H/F, putative	12	31.4	55.134	487	0.13132	78.065	-2.92884
>GeneDB|Tb927.4.4430 | organism=Trypanosoma_brucei_TREU927 | product=adenylyl cyclase | location=Tb927_04_v4:1178321-1182052(-) | length=1243;>GeneDB|Tb927.4.4450 | organism=Trypanosoma_brucei_TREU927 | product=adenylyl cyclase | location=Tb927_04_v4:1188009-1191740(-) | length=1243;>GeneDB|Tb927.4.4460 | organism=Trypanosoma_brucei_TREU927 | product=adenylyl cyclase | location=Tb927_04_v4:119229…	16	7;7;7;7;7;7;2;0;0;0;0;0;0;0;0;0	Tb927.4.4430	adenylyl cyclase	7	9.1	138.27	1243	0.13259	135.97	-2.91496
>GeneDB|Tb927.8.5460 | organism=Trypanosoma_brucei_TREU927 | product=flagellar calcium-binding protein,44 kDa calflagin,44 kDa calcimedin | location=Tb927_08_v4:1617393-1618616(+) | length=407;>GeneDB|Tb927.8.5440 | organism=Trypanosoma_brucei_TREU927 | product=flagellar calcium-binding protein,24 kDa calflagin,24 kDa calcimedin | location=Tb927_08_v4:1613150-1613806(+) | length=218;>GeneDB|Tb927…	4	15;11;10;8	Tb927.8.5460	flagellar calcium-binding protein,44 kDa calflagin,44 kDa calcimedin	15	44.5	45.718	407	0.13639	98.14	-2.87419
>GeneDB|Tb927.10.9450 | organism=Trypanosoma_brucei_TREU927 | product=hypothetical protein | location=Tb927_10_v5:2337653-2338405(+) | length=250	1	2	Tb927.10.9450	hypothetical protein	2	6	27.549	250	0.13838	131.37	-2.85329
>GeneDB|Tb09.160.0990 | organism=Trypanosoma_brucei_TREU927 | product=protein kinase, putative | location=Tb927_09_v4:489576-491915(-) | length=779	1	2	Tb09.160.0990	protein kinase, putative	2	4.1	85.428	779	0.14017	170.84	-2.83475
>GeneDB|Tb11.02.5280 | organism=Trypanosoma_brucei_TREU927 | product=glycerol-3-phosphate dehydrogenase (FAD-dependent), mitochondrial | location=Tb927_11_01_v4:2053634-2055445(+) | length=603;REV__>REV_GeneDB|Tb927.10.9350 Reverse sequence, was | organism=Trypanosoma_brucei_TREU927 | product=hypothetical protein, conserved | location=Tb927_10_v5:2313978-2316545(+) | length=855	2	40;1	Tb11.02.5280	glycerol-3-phosphate dehydrogenase (FAD-dependent), mitochondrial	40	76.8	66.991	603	0.14195	39.171	-2.81655
>GeneDB|Tb927.5.360 | organism=Trypanosoma_brucei_TREU927 | product=75 kDa invariant surface glycoprotein | location=Tb927_05_v4:106730-108301(-) | length=523;>GeneDB|Tb927.5.350 | organism=Trypanosoma_brucei_TREU927 | product=75 kDa invariant surface glycoprotein, putative | location=Tb927_05_v4:104571-106139(-) | length=522;>GeneDB|Tb927.5.400 | organism=Trypanosoma_brucei_TREU927 | product=75 …	3	8;0;0	Tb927.5.360	75 kDa invariant surface glycoprotein	8	16.4	58.225	523	0.14212	127.54	-2.81482
>GeneDB|Tb927.4.2450 | organism=Trypanosoma_brucei_TREU927 | product=thioredoxin, putative | location=Tb927_04_v4:636840-638081(+) | length=411	1	23	Tb927.4.2450	thioredoxin, putative	23	62.3	44.49	411	0.14492	43.101	-2.78667
>GeneDB|Tb927.10.14140 | organism=Trypanosoma_brucei_TREU927 | product=pyruvate kinase 1 | location=Tb927_10_v5:3434635-3436134(-) | length=499	1	41	Tb927.10.14140	pyruvate kinase 1	41	85.8	54.423	499	0.14698	56.139	-2.76631
>GeneDB|Tb927.6.940 | organism=Trypanosoma_brucei_TREU927 | product=metacaspase MCA2 | location=Tb927_06_v4:400291-401334(-) | length=347	1	1	Tb927.6.940	metacaspase MCA2	1	2.6	37.779	347	0.14749	82.397	-2.76131
>GeneDB|Tb927.10.14760 | organism=Trypanosoma_brucei_TREU927 | product=hypothetical protein, conserved | location=Tb927_10_v5:3599832-3600401(-) | length=189	1	5	Tb927.10.14760	hypothetical protein, conserved	5	23.3	20.51	189	0.1482	15.259	-2.75438
>GeneDB|Tb927.8.7270 | organism=Trypanosoma_brucei_TREU927 | product=hypothetical protein, conserved | location=Tb927_08_v4:2088199-2089416(+) | length=405;>GeneDB|Tb927.4.5100 | organism=Trypanosoma_brucei_TREU927 | product=hypothetical protein, conserved | location=Tb927_04_v4:1397045-1398262(-) | length=405	2	6;1	Tb927.8.7270	hypothetical protein, conserved	6	27.2	45.04	405	0.14836	34.109	-2.75283
>GeneDB|Tb927.6.3120 | organism=Trypanosoma_brucei_TREU927 | product=chaperone protein DNAj, putative | location=Tb927_06_v4:921717-922607(+) | length=296	1	2	Tb927.6.3120	chaperone protein DNAj, putative	2	7.1	33.758	296	0.14847	49.54	-2.75176
>GeneDB|Tb927.8.3510 | organism=Trypanosoma_brucei_TREU927 | product=thymidylate kinase, putative | location=Tb927_08_v4:1043455-1044492(+) | length=345;>GeneDB|Tb927.8.3910 | organism=Trypanosoma_brucei_TREU927 | product=thymidylate kinase, putative | location=Tb927_08_v4:1164494-1165531(-) | length=345	2	2;2	Tb927.8.3510	thymidylate kinase, putative	2	9.6	39.44	345	0.14894	132.51	-2.7472
>GeneDB|Tb927.5.390 | organism=Trypanosoma_brucei_TREU927 | product=75 kDa invariant surface glycoprotein, putative | location=Tb927_05_v4:121424-122992(+) | length=522;>GeneDB|Tb927.5.370 | organism=Trypanosoma_brucei_TREU927 | product=75 kDa invariant surface glycoprotein, putative | location=Tb927_05_v4:108898-110469(-) | length=523	2	5;2	Tb927.5.390	75 kDa invariant surface glycoprotein, putative	5	14.2	57.736	522	0.14905	203.02	-2.74613
>GeneDB|Tb927.4.4870 | organism=Trypanosoma_brucei_TREU927 | product=amino acid transporter, putative | location=Tb927_04_v4:1329266-1330621(-) | length=451;>GeneDB|Tb927.4.4830 | organism=Trypanosoma_brucei_TREU927 | product=amino acid transporter, putative | location=Tb927_04_v4:1321396-1322748(-) | length=450;>GeneDB|Tb927.4.4850 | organism=Trypanosoma_brucei_TREU927 | product=amino acid trans…	3	3;3;3	Tb927.4.4870	amino acid transporter, putative	3	7.1	48.143	451	0.15164	121.53	-2.72128
>GeneDB|Tb927.7.6570 | organism=Trypanosoma_brucei_TREU927 | product=hypothetical protein, conserved | location=Tb927_07_v4:1794743-1795450(-) | length=235	1	2	Tb927.7.6570	hypothetical protein, conserved	2	19.6	26.201	235	0.15259	50.16	-2.71227
>GeneDB|Tb927.4.3380 | organism=Trypanosoma_brucei_TREU927 | product=myosin IB heavy chain, putative | location=Tb927_04_v4:880122-883625(-) | length=1167	1	8	Tb927.4.3380	myosin IB heavy chain, putative	8	9.9	131.76	1167	0.1526	60.293	-2.71217
>GeneDB|Tb927.7.1390 | organism=Trypanosoma_brucei_TREU927 | product=RNA-binding protein, putative | location=Tb927_07_v4:353441-353995(+) | length=184	1	2	Tb927.7.1390	RNA-binding protein, putative	2	9.8	20.679	184	0.15543	71.425	-2.68566
>GeneDB|Tb11.01.7600 | organism=Trypanosoma_brucei_TREU927 | product=amino acid transporter, putative | location=Tb927_11_01_v4:4165015-4166499(-) | length=494	1	1	Tb11.01.7600	amino acid transporter, putative	1	2.4	53.727	494	0.15697	10.307	-2.67144
>GeneDB|Tb927.6.4390 | organism=Trypanosoma_brucei_TREU927 | product=kinesin, putative | location=Tb927_06_v4:1234638-1237973(-) | length=1111	1	27	Tb927.6.4390	kinesin, putative	27	30.5	125.9	1111	0.16035	93.512	-2.6407
>GeneDB|Tb927.5.1260 | organism=Trypanosoma_brucei_TREU927 | product=hypothetical protein, conserved | location=Tb927_05_v4:415317-417038(+) | length=573	1	13	Tb927.5.1260	hypothetical protein, conserved	13	23.2	62.563	573	0.16169	78.913	-2.6287
>GeneDB|Tb11.02.1240 | organism=Trypanosoma_brucei_TREU927 | product=hypothetical protein | location=Tb927_11_01_v4:1086822-1087544(+) | length=240	1	3	Tb11.02.1240	hypothetical protein	3	15.4	25.324	240	0.16174	193.78	-2.62825
>GeneDB|Tb927.2.1700 | organism=Trypanosoma_brucei_TREU927 | product=hypothetical protein, conserved | location=Tb927_02_v4:317225-319513(+) | length=762	1	3	Tb927.2.1700	hypothetical protein, conserved	3	5.1	82.72	762	0.16232	134.54	-2.62309
>GeneDB|Tb927.8.7960 | organism=Trypanosoma_brucei_TREU927 | product=hypothetical protein | location=Tb927_08_v4:2344967-2346307(+) | length=446	1	2	Tb927.8.7960	hypothetical protein	2	8.5	47.548	446	0.16288	47.898	-2.61812
>GeneDB|Tb09.211.2060 | organism=Trypanosoma_brucei_TREU927 | product=hypothetical protein | location=Tb927_09_v4:1636170-1636565(-) | length=131	1	1	Tb09.211.2060	hypothetical protein	1	8.4	15.012	131	0.163	25.877	-2.61706
>GeneDB|Tb927.8.6730 | organism=Trypanosoma_brucei_TREU927 | product=hypothetical protein, conserved | location=Tb927_08_v4:1949017-1950801(-) | length=594	1	2	Tb927.8.6730	hypothetical protein, conserved	2	2.4	65.434	594	0.16379	238.71	-2.61008
>GeneDB|Tb927.7.6440 | organism=Trypanosoma_brucei_TREU927 | product=hypothetical protein, conserved | location=Tb927_07_v4:1748269-1748937(+) | length=222	1	8	Tb927.7.6440	hypothetical protein, conserved	8	50	25.254	222	0.16508	79.338	-2.59876
>GeneDB|Tb09.160.5440 | organism=Trypanosoma_brucei_TREU927 | product=variant surface glycoprotein (VSG)-related, putative | location=Tb927_09_v4:1169190-1170293(-) | length=367;>GeneDB|Tb09.v1.0290 | organism=Trypanosoma_brucei_TREU927 | product=variant surface glycoprotein (VSG)-related, putative | location=Tb927_09_v4:1156114-1157217(-) | length=367	2	3;3	Tb09.160.5440	variant surface glycoprotein (VSG)-related, putative	3	7.9	40.717	367	0.16535	65.908	-2.59641
>GeneDB|Tb927.8.2660 | organism=Trypanosoma_brucei_TREU927 | product=hypothetical protein, conserved | location=Tb927_08_v4:785065-790824(+) | length=1919	1	4	Tb927.8.2660	hypothetical protein, conserved	4	3.7	209.69	1919	0.16797	85.267	-2.57372
>GeneDB|Tb927.2.2120 | organism=Trypanosoma_brucei_TREU927 | product=protein kinase, putative,NIMA/Nek Serine/threonine-protein kinase family, putative | location=Tb927_02_v4:404476-405837(-) | length=453	1	9	Tb927.2.2120	protein kinase, putative,NIMA/Nek Serine/threonine-protein kinase family, putative	9	30.2	50.602	453	0.17046	41.642	-2.55249
>GeneDB|Tb11.22.0010 | organism=Trypanosoma_brucei_TREU927 | product=hypothetical protein, conserved | location=Tb927_11_01_v4:643294-646947(+) | length=1217	1	4	Tb11.22.0010	hypothetical protein, conserved	4	5.8	138.83	1217	0.1716	72.083	-2.54288
>GeneDB|Tb927.1.4650 | organism=Trypanosoma_brucei_TREU927 | product=cyclin-like F-box protein | location=Tb927_01_v4:954904-956334(+) | length=476	1	2	Tb927.1.4650	cyclin-like F-box protein	2	5	52.284	476	0.1717	250.1	-2.54204
>GeneDB|Tb927.8.7210 | organism=Trypanosoma_brucei_TREU927 | product=hypothetical protein, conserved | location=Tb927_08_v4:2071616-2072065(+) | length=149;>GeneDB|Tb927.4.5190 | organism=Trypanosoma_brucei_TREU927 | product=hypothetical protein, conserved | location=Tb927_04_v4:1417762-1418211(-) | length=149	2	2;1	Tb927.8.7210	hypothetical protein, conserved	2	20.8	16.908	149	0.17376	113.24	-2.52483
>GeneDB|Tb927.4.2760 | organism=Trypanosoma_brucei_TREU927 | product=hypothetical protein, conserved | location=Tb927_04_v4:731459-733477(+) | length=672	1	12	Tb927.4.2760	hypothetical protein, conserved	12	23.7	75.492	672	0.17766	103.6	-2.49281
>GeneDB|Tb927.3.4100 | organism=Trypanosoma_brucei_TREU927 | product=hypothetical protein, conserved | location=Tb927_03_v4:1155276-1157033(-) | length=575;>GeneDB|Tb927.3.4080 | organism=Trypanosoma_brucei_TREU927 | product=hypothetical protein, conserved | location=Tb927_03_v4:1150627-1152378(-) | length=571	2	2;1	Tb927.3.4100	hypothetical protein, conserved	2	5	63.252	575	0.17916	38.381	-2.48068
>GeneDB|Tb927.10.2020 | organism=Trypanosoma_brucei_TREU927 | product=hexokinase | location=Tb927_10_v5:529818-531233(+) | length=471	1	3	Tb927.10.2020	hexokinase	3	7.9	51.148	471	0.1793	108.1	-2.47955
>GeneDB|Tb927.10.12510 | organism=Trypanosoma_brucei_TREU927 | product=P-type H -ATPase, putative | location=Tb927_10_v5:3034630-3037392(-) | length=920	1	11	Tb927.10.12510	P-type H -ATPase, putative	11	14.6	100.63	920	0.18006	174.77	-2.47345
>GeneDB|Tb927.8.4430 | organism=Trypanosoma_brucei_TREU927 | product=uridine phosphorylase;with=PDB:3BJE | location=Tb927_08_v4:1316142-1317167(-) | length=341;REV__>GeneDB|Tb927.2.4460 | organism=Trypanosoma_brucei_TREU927 | product=hypothetical protein, conserved | location=Tb927_02_v4:789055-790845(-) | length=596	2	28;1	Tb927.8.4430	uridine phosphorylase;with=PDB:3BJE	28	75.7	36.925	341	0.182	42.313	-2.45799
>GeneDB|Tb927.10.5810 | organism=Trypanosoma_brucei_TREU927 | product=hypothetical protein, conserved | location=Tb927_10_v5:1441554-1442855(-) | length=433	1	44	Tb927.10.5810	hypothetical protein, conserved	44	84.3	48.257	433	0.18271	60.51	-2.45237
>GeneDB|Tb927.1.4830 | organism=Trypanosoma_brucei_TREU927 | product=phospholipase A1 | location=Tb927_01_v4:986718-987620(+) | length=300	1	9	Tb927.1.4830	phospholipase A1	9	46.7	32.404	300	0.18476	38.563	-2.43628
>GeneDB|Tb927.8.3550 | organism=Trypanosoma_brucei_TREU927 | product=mitogen-activated protein kinase 3, putative | location=Tb927_08_v4:1066630-1067745(-) | length=371	1	11	Tb927.8.3550	mitogen-activated protein kinase 3, putative	11	41	42.672	371	0.1858	30.034	-2.42818
>GeneDB|Tb927.7.4770 | organism=Trypanosoma_brucei_TREU927 | product=cyclophilin-type peptidyl-prolyl cis-trans isomerase, putative | location=Tb927_07_v4:1264630-1265226(-) | length=173	1	7	Tb927.7.4770	cyclophilin-type peptidyl-prolyl cis-trans isomerase, putative	7	59.5	18.59	173	0.18618	26.665	-2.42523
>GeneDB|Tb927.5.2090 | organism=Trypanosoma_brucei_TREU927 | product=kinesin, putative | location=Tb927_05_v4:659841-663107(-) | length=1088;>GeneDB|Tb927.7.5650 | organism=Trypanosoma_brucei_TREU927 | product=kinesin, putative | location=Tb927_07_v4:1527714-1529630(+) | length=638	2	26;0	Tb927.5.2090	kinesin, putative	26	31.3	122.72	1088	0.19054	48.961	-2.39183
>GeneDB|Tb927.7.1330 | organism=Trypanosoma_brucei_TREU927 | product=hypothetical protein, conserved | location=Tb927_07_v4:342229-343296(+) | length=355	1	4	Tb927.7.1330	hypothetical protein, conserved	4	14.6	39.755	355	0.1906	26.218	-2.39138
>GeneDB|Tb927.2.2770 | organism=Trypanosoma_brucei_TREU927 | product=hypothetical protein, conserved | location=Tb927_02_v4:541346-541723(+) | length=125	1	5	Tb927.2.2770	hypothetical protein, conserved	5	65.6	13.445	125	0.19081	43.612	-2.38979
>GeneDB|Tb927.6.3640 | organism=Trypanosoma_brucei_TREU927 | product=hypothetical protein, conserved | location=Tb927_06_v4:1084721-1086406(-) | length=561	1	12	Tb927.6.3640	hypothetical protein, conserved	12	29.1	62.901	561	0.19156	63.615	-2.38413
>GeneDB|Tb11.01.0170 | organism=Trypanosoma_brucei_TREU927 | product=NADPH--cytochrome p450 reductase, putative | location=Tb927_11_01_v4:2290577-2292484(+) | length=635;REV__>REV_GeneDB|Tb11.02.0354 Reverse sequence, was | organism=Trypanosoma_brucei_TREU927 | product=hypothetical protein, conserved | location=Tb927_11_01_v4:794698-796827(-) | length=709	2	8;0	Tb11.01.0170	NADPH--cytochrome p450 reductase, putative	8	16.9	70.946	635	0.19258	63.902	-2.37647
>GeneDB|Tb927.10.6050 | organism=Trypanosoma_brucei_TREU927 | product=clathrin heavy chain | location=Tb927_10_v5:1521439-1526550(-) | length=1703	1	108	Tb927.10.6050	clathrin heavy chain	108	77.9	190.62	1703	0.19389	48.646	-2.36669
>GeneDB|Tb927.10.1770 | organism=Trypanosoma_brucei_TREU927 | product=hypothetical protein | location=Tb927_10_v5:467113-467907(-) | length=264	1	3	Tb927.10.1770	hypothetical protein	3	15.2	28.189	264	0.19603	113.08	-2.35085
>GeneDB|Tb927.1.3950 | organism=Trypanosoma_brucei_TREU927 | product=D-alanine aminotransferase | location=Tb927_01_v4:840877-842391(+) | length=504	1	28	Tb927.1.3950	D-alanine aminotransferase	28	69.8	55.704	504	0.19638	42.205	-2.34828
>GeneDB|Tb927.6.4250 | organism=Trypanosoma_brucei_TREU927 | product=hypothetical protein, conserved | location=Tb927_06_v4:1214183-1214893(-) | length=236	1	2	Tb927.6.4250	hypothetical protein, conserved	2	12.3	24.919	236	0.19642	54.999	-2.34799
>GeneDB|Tb927.10.13100 | organism=Trypanosoma_brucei_TREU927 | product=hypothetical protein, conserved | location=Tb927_10_v5:3189375-3190691(-) | length=438	1	2	Tb927.10.13100	hypothetical protein, conserved	2	6.8	50.915	438	0.19712	28.861	-2.34285
>GeneDB|Tb927.10.2010 | organism=Trypanosoma_brucei_TREU927 | product=hexokinase | location=Tb927_10_v5:526772-528187(+) | length=471	1	3	Tb927.10.2010	hexokinase	3	11.7	51.295	471	0.20149	67.396	-2.31122
>GeneDB|Tb927.5.4570 | organism=Trypanosoma_brucei_TREU927 | product=hypothetical protein, conserved | location=Tb927_05_v4:1356572-1359028(+) | length=818	1	2	Tb927.5.4570	hypothetical protein, conserved	2	3.4	88.866	818	0.2024	87.657	-2.30472
>GeneDB|Tb927.4.200 | organism=Trypanosoma_brucei_TREU927 | product=retrotransposon hot spot protein 1 (RHS1), putative | location=Tb927_04_v4:34907-36946(-) | length=679	1	3	Tb927.4.200	retrotransposon hot spot protein 1 (RHS1), putative	3	5.6	78.183	679	0.20347	352.9	-2.29711
>GeneDB|Tb927.1.4280 | organism=Trypanosoma_brucei_TREU927 | product=hypothetical protein, conserved | location=Tb927_01_v4:881086-883182(+) | length=698	1	9	Tb927.1.4280	hypothetical protein, conserved	9	18.6	75.277	698	0.20394	39.174	-2.29378
>GeneDB|Tb927.8.3770 | organism=Trypanosoma_brucei_TREU927 | product=mitogen-activated protein kinase, putative | location=Tb927_08_v4:1124964-1126193(-) | length=409	1	20	Tb927.8.3770	mitogen-activated protein kinase, putative	20	55.7	46.936	409	0.20637	45.259	-2.27669
>GeneDB|Tb927.8.2250 | organism=Trypanosoma_brucei_TREU927 | product=hypothetical protein, conserved | location=Tb927_08_v4:688146-690689(+) | length=847	1	2	Tb927.8.2250	hypothetical protein, conserved	2	5.1	94.039	847	0.20815	9.765	-2.2643
>GeneDB|Tb11.02.3410 | organism=Trypanosoma_brucei_TREU927 | product=hypothetical protein, conserved | location=Tb927_11_01_v4:1584594-1589756(+) | length=1720	1	3	Tb11.02.3410	hypothetical protein, conserved	3	2.1	191.27	1720	0.20935	177.44	-2.25601
>GeneDB|Tb927.3.4660 | organism=Trypanosoma_brucei_TREU927 | product=hypothetical protein, conserved | location=Tb927_03_v4:1318525-1320315(-) | length=596	1	4	Tb927.3.4660	hypothetical protein, conserved	4	11.6	63.424	596	0.20937	83.463	-2.25587
>GeneDB|Tb11.01.6790 | organism=Trypanosoma_brucei_TREU927 | product=hypothetical protein, conserved | location=Tb927_11_01_v4:3966711-3968417(-) | length=568	1	20	Tb11.01.6790	hypothetical protein, conserved	20	39.1	62.089	568	0.21219	63.061	-2.23657
>GeneDB|Tb11.02.2410 | organism=Trypanosoma_brucei_TREU927 | product=clathrin coat assembly protein, putative | location=Tb927_11_01_v4:1358987-1360465(+) | length=492	1	7	Tb11.02.2410	clathrin coat assembly protein, putative	7	15.7	54.924	492	0.21434	86.173	-2.22203
>GeneDB|Tb927.5.3220 | organism=Trypanosoma_brucei_TREU927 | product=signal peptidase type I, putative | location=Tb927_05_v4:1000056-1000682(-) | length=208	1	8	Tb927.5.3220	signal peptidase type I, putative	8	47.6	23.706	208	0.21446	35.568	-2.22122
>GeneDB|Tb927.10.5080 | organism=Trypanosoma_brucei_TREU927 | product=GPI transamidase component Tta2 | location=Tb927_10_v5:1252551-1253783(+) | length=410	1	2	Tb927.10.5080	GPI transamidase component Tta2	2	10	45.619	410	0.21939	25.712	-2.18843
>GeneDB|Tb927.3.3560 | organism=Trypanosoma_brucei_TREU927 | product=hypothetical protein, conserved | location=Tb927_03_v4:1001768-1003642(+) | length=624	1	30	Tb927.3.3560	hypothetical protein, conserved	30	60.6	69.087	624	0.22133	26.62	-2.17573
>GeneDB|Tb927.8.4570 | organism=Trypanosoma_brucei_TREU927 | product=hypothetical protein, conserved | location=Tb927_08_v4:1355791-1356795(-) | length=334	1	4	Tb927.8.4570	hypothetical protein, conserved	4	15.9	37.012	334	0.22204	153.79	-2.17111
>GeneDB|Tb927.10.11420 | organism=Trypanosoma_brucei_TREU927 | product=hypothetical protein, conserved | location=Tb927_10_v5:2781585-2783765(+) | length=726	1	2	Tb927.10.11420	hypothetical protein, conserved	2	3.7	80.889	726	0.22214	349.3	-2.17046
>GeneDB|Tb09.211.1150 | organism=Trypanosoma_brucei_TREU927 | product=hypothetical protein, conserved | location=Tb927_09_v4:1471256-1471894(-) | length=177	1	10	Tb09.211.1150	hypothetical protein, conserved	10	47.5	20.691	177	0.22214	46.79	-2.17046
>GeneDB|Tb09.160.2370 | organism=Trypanosoma_brucei_TREU927 | product=hypothetical protein, conserved | location=Tb927_09_v4:699437-700099(+) | length=220	1	8	Tb09.160.2370	hypothetical protein, conserved	8	56.4	23.95	220	0.22464	31.703	-2.15431
>GeneDB|Tb927.3.2420 | organism=Trypanosoma_brucei_TREU927 | product=hypothetical protein, conserved | location=Tb927_03_v4:610112-610492(+) | length=126	1	5	Tb927.3.2420	hypothetical protein, conserved	5	37.3	14.261	126	0.22466	34.061	-2.15418
>GeneDB|Tb927.8.4160 | organism=Trypanosoma_brucei_TREU927 | product=hypothetical protein, conserved | location=Tb927_08_v4:1223054-1226791(-) | length=1245	1	3	Tb927.8.4160	hypothetical protein, conserved	3	3.7	135.52	1245	0.22468	162.31	-2.15406
>GeneDB|Tb927.4.810 | organism=Trypanosoma_brucei_TREU927 | product=expression site-associated gene (ESAG) protein, putative,expression site-associated gene 5 (ESAG5) protein, putative | location=Tb927_04_v4:229013-230464(-) | length=483	1	1	Tb927.4.810	expression site-associated gene (ESAG) protein, putative,expression site-associated gene 5 (ESAG5) protein, putative	1	3.5	52.042	483	0.22481	100.29	-2.15322
>GeneDB|Tb11.01.3880 | organism=Trypanosoma_brucei_TREU927 | product=hypothetical protein, conserved | location=Tb927_11_01_v4:3161138-3162088(+) | length=316	1	4	Tb11.01.3880	hypothetical protein, conserved	4	19	36.371	316	0.2251	128.59	-2.15136
>GeneDB|Tb927.10.13290 | organism=Trypanosoma_brucei_TREU927 | product=ethanolamine phosphotransferase (EPT) | location=Tb927_10_v5:3246662-3247900(-) | length=412	1	3	Tb927.10.13290	ethanolamine phosphotransferase (EPT)	3	10.2	45.283	412	0.22511	20.515	-2.1513
>GeneDB|Tb09.211.2730 | organism=Trypanosoma_brucei_TREU927 | product=Gim5A protein,glycosomal membrane protein | location=Tb927_09_v4:1753704-1754435(+) | length=243	1	2	Tb09.211.2730	Gim5A protein,glycosomal membrane protein	2	7.4	26.408	243	0.22522	9.348	-2.15059
>GeneDB|Tb927.10.15440 | organism=Trypanosoma_brucei_TREU927 | product=hypothetical protein, conserved | location=Tb927_10_v5:3792626-3793483(+) | length=285	1	6	Tb927.10.15440	hypothetical protein, conserved	6	20.4	32.727	285	0.22865	38.41	-2.12879
>GeneDB|Tb11.01.2460 | organism=Trypanosoma_brucei_TREU927 | product=hypothetical protein, conserved | location=Tb927_11_01_v4:2804734-2805960(+) | length=408	1	10	Tb11.01.2460	hypothetical protein, conserved	10	37.3	45.229	408	0.22877	45.064	-2.12803
>GeneDB|Tb927.7.4500 | organism=Trypanosoma_brucei_TREU927 | product=hypothetical protein, conserved | location=Tb927_07_v4:1199369-1200955(-) | length=528	1	29	Tb927.7.4500	hypothetical protein, conserved	29	63.6	58.428	528	0.2316	25.373	-2.11029
>GeneDB|Tb11.02.5450 | organism=Trypanosoma_brucei_TREU927 | product=glucose-regulated protein 78, putative,luminal binding protein 1 (BiP), putative | location=Tb927_11_01_v4:2093675-2095636(-) | length=653;>GeneDB|Tb11.02.5500 | organism=Trypanosoma_brucei_TREU927 | product=glucose-regulated protein 78, putative,luminal binding protein 1 (BiP), putative | location=Tb927_11_01_v4:2102637-2104598…	2	60;60	Tb11.02.5450	glucose-regulated protein 78, putative,luminal binding protein 1 (BiP), putative	60	75.5	71.434	653	0.23299	35.449	-2.10166
>GeneDB|Tb927.10.1230 | organism=Trypanosoma_brucei_TREU927 | product=hypothetical protein, conserved | location=Tb927_10_v5:333298-334326(-) | length=342	1	8	Tb927.10.1230	hypothetical protein, conserved	8	28.7	37.682	342	0.23412	50.036	-2.09468
>GeneDB|Tb09.160.4770 | organism=Trypanosoma_brucei_TREU927 | product=protein kinase, putative | location=Tb927_09_v4:1026509-1028689(+) | length=692	1	19	Tb09.160.4770	protein kinase, putative	19	39.2	76.464	692	0.23442	30.098	-2.09283
>GeneDB|Tb927.3.3450 | organism=Trypanosoma_brucei_TREU927 | product=ADP-ribosylation factor-like protein 3A, putative | location=Tb927_03_v4:979573-980109(+) | length=178	1	14	Tb927.3.3450	ADP-ribosylation factor-like protein 3A, putative	14	82.6	19.881	178	0.23547	34.1	-2.08638
>GeneDB|Tb927.10.16100 | organism=Trypanosoma_brucei_TREU927 | product=peptidylprolyl isomerase-like protein, putative | location=Tb927_10_v5:3959421-3960698(+) | length=425;>GeneDB|Tb927.10.10 | organism=Trypanosoma_brucei_TREU927 | product=variant surface glycoprotein (VSG),variant surface glycoprotein VSG 10.1 | location=Tb927_10_v5:1486-2862(-) | length=458	2	26;0	Tb927.10.16100	peptidylprolyl isomerase-like protein, putative	26	73.4	47.604	425	0.23848	40.085	-2.06806
>GeneDB|Tb927.10.7860 | organism=Trypanosoma_brucei_TREU927 | product=hypothetical protein, conserved | location=Tb927_10_v5:1965815-1966465(-) | length=216	1	2	Tb927.10.7860	hypothetical protein, conserved	2	13	23.823	216	0.23948	5.5979	-2.06202
>GeneDB|Tb927.10.1430 | organism=Trypanosoma_brucei_TREU927 | product=hypothetical protein, conserved | location=Tb927_10_v5:374347-375084(-) | length=245	1	12	Tb927.10.1430	hypothetical protein, conserved	12	67.8	27.339	245	0.23971	44.372	-2.06064
>GeneDB|Tb927.5.1930 | organism=Trypanosoma_brucei_TREU927 | product=hypothetical protein, conserved | location=Tb927_05_v4:598353-599000(+) | length=215	1	10	Tb927.5.1930	hypothetical protein, conserved	10	50.7	24.188	215	0.2403	36.937	-2.05709
>GeneDB|Tb11.01.1230 | organism=Trypanosoma_brucei_TREU927 | product=ADP-ribosylation factor GTPase activating protein, putative | location=Tb927_11_01_v4:2535515-2536576(-) | length=353	1	4	Tb11.01.1230	ADP-ribosylation factor GTPase activating protein, putative	4	22.4	37.113	353	0.24034	20.489	-2.05685
>GeneDB|Tb927.7.2970 | organism=Trypanosoma_brucei_TREU927 | product=ATP-dependent DEAD/H RNA helicase, putative | location=Tb927_07_v4:744793-747267(+) | length=824	1	5	Tb927.7.2970	ATP-dependent DEAD/H RNA helicase, putative	5	8.1	92.253	824	0.24552	52.87	-2.02609
>GeneDB|Tb927.8.7720 | organism=Trypanosoma_brucei_TREU927 | product=hypothetical protein, conserved | location=Tb927_08_v4:2222999-2223676(+) | length=225	1	4	Tb927.8.7720	hypothetical protein, conserved	4	25.8	24.902	225	0.24602	172.44	-2.02315
>GeneDB|Tb927.4.2030 | organism=Trypanosoma_brucei_TREU927 | product=hypothetical protein, conserved | location=Tb927_04_v4:511413-512066(-) | length=217	1	3	Tb927.4.2030	hypothetical protein, conserved	3	21.2	22.704	217	0.24646	44.085	-2.02057
>GeneDB|Tb11.03.0850 | organism=Trypanosoma_brucei_TREU927 | product=phosphatase and tensin homologue, putative | location=Tb927_11_01_v4:66698-67480(-) | length=260	1	3	Tb11.03.0850	phosphatase and tensin homologue, putative	3	15	28.978	260	0.2481	14.461	-2.01101
>GeneDB|Tb927.6.2860 | organism=Trypanosoma_brucei_TREU927 | product=hypothetical protein, conserved | location=Tb927_06_v4:859092-860459(+) | length=455	1	14	Tb927.6.2860	hypothetical protein, conserved	14	44.6	48.966	455	0.24816	40.936	-2.01066
>GeneDB|Tb09.211.3610 | organism=Trypanosoma_brucei_TREU927 | product=ubiquitin-activating enzyme e1, putative | location=Tb927_09_v4:1935154-1938798(+) | length=1214;REV__>REV_GeneDB|Tb927.10.13280 Reverse sequence, was | organism=Trypanosoma_brucei_TREU927 | product=hypothetical protein, conserved | location=Tb927_10_v5:3238318-3246138(-) | length=2606;REV__>GeneDB|Tb927.10.1890 | organism=Tryp…	3	76;0;0	Tb09.211.3610	ubiquitin-activating enzyme e1, putative	76	69.3	134.65	1214	0.24839	46.015	-2.00932
>GeneDB|Tb927.6.1800 | organism=Trypanosoma_brucei_TREU927 | product=protein phosphatase 2C, putative | location=Tb927_06_v4:602363-603511(-) | length=382	1	20	Tb927.6.1800	protein phosphatase 2C, putative	20	68.6	41.135	382	0.25027	29.758	-1.99844
>GeneDB|Tb09.211.1030 | organism=Trypanosoma_brucei_TREU927 | product=inositol phosphorylceramide synthase | location=Tb927_09_v4:1453828-1454878(-) | length=337;>GeneDB|Tb09.211.1010 | organism=Trypanosoma_brucei_TREU927 | product=choline phosphorylceramide synthase | location=Tb927_09_v4:1449306-1450295(-) | length=329;>GeneDB|Tb09.211.1020 | organism=Trypanosoma_brucei_TREU927 | product=phosph…	3	1;0;0	Tb09.211.1030	inositol phosphorylceramide synthase	1	4.2	37.964	337	0.25257	32.51	-1.98524
>GeneDB|Tb09.160.5200 | organism=Trypanosoma_brucei_TREU927 | product=hypothetical protein, conserved | location=Tb927_09_v4:1103278-1104165(+) | length=295	1	17	Tb09.160.5200	hypothetical protein, conserved	17	71.9	32.572	295	0.2536	48.65	-1.97937
>GeneDB|Tb927.8.1870 | organism=Trypanosoma_brucei_TREU927 | product=Golgi/lysosome glycoprotein 1 | location=Tb927_08_v4:610692-612542(-) | length=616	1	28	Tb927.8.1870	Golgi/lysosome glycoprotein 1	28	54.1	67.597	616	0.25628	129.63	-1.96421
>GeneDB|Tb927.5.2500 | organism=Trypanosoma_brucei_TREU927 | product=hypothetical protein, conserved | location=Tb927_05_v4:803555-805642(+) | length=695	1	4	Tb927.5.2500	hypothetical protein, conserved	4	7.1	75.357	695	0.26016	32.452	-1.94253
>GeneDB|Tb11.01.0290 | organism=Trypanosoma_brucei_TREU927 | product=carbonic anhydrase-like protein | location=Tb927_11_01_v4:2262820-2264088(+) | length=422	1	10	Tb11.01.0290	carbonic anhydrase-like protein	10	30.3	45.777	422	0.26091	96.482	-1.93838
>GeneDB|Tb927.8.8230 | organism=Trypanosoma_brucei_TREU927 | product=amino acid transporter, putative | location=Tb927_08_v4:2433366-2434751(+) | length=461;>GeneDB|Tb927.8.8250 | organism=Trypanosoma_brucei_TREU927 | product=amino acid transporter, putative | location=Tb927_08_v4:2441605-2442990(+) | length=461;>GeneDB|Tb927.8.8260 | organism=Trypanosoma_brucei_TREU927 | product=amino acid trans…	3	4;3;3	Tb927.8.8230	amino acid transporter, putative	4	10.8	49.701	461	0.26306	93.248	-1.92654
>GeneDB|Tb927.7.3630 | organism=Trypanosoma_brucei_TREU927 | product=TPR-repeat-containing chaperone protein DNAJ, putative | location=Tb927_07_v4:946104-947690(-) | length=528	1	24	Tb927.7.3630	TPR-repeat-containing chaperone protein DNAJ, putative	24	55.7	60.135	528	0.26332	37.131	-1.92511
>GeneDB|Tb927.7.7000 | organism=Trypanosoma_brucei_TREU927 | product=hypothetical protein, conserved | location=Tb927_07_v4:2000830-2005620(-) | length=1596	1	13	Tb927.7.7000	hypothetical protein, conserved	13	12.2	175.61	1596	0.26387	59.276	-1.9221
>GeneDB|Tb927.4.2290 | organism=Trypanosoma_brucei_TREU927 | product=glucose transporter, putative | location=Tb927_04_v4:595290-596948(+) | length=552	1	1	Tb927.4.2290	glucose transporter, putative	1	3.3	59.578	552	0.26397	3.9495	-1.92155
>GeneDB|Tb927.8.2820 | organism=Trypanosoma_brucei_TREU927 | product=hypothetical protein, conserved | location=Tb927_08_v4:842913-846791(+) | length=1292	1	19	Tb927.8.2820	hypothetical protein, conserved	19	56.5	141.11	1292	0.26462	62.471	-1.91801
>GeneDB|Tb11.02.3710 | organism=Trypanosoma_brucei_TREU927 | product=hypothetical protein, conserved | location=Tb927_11_01_v4:1651070-1654843(+) | length=1257	1	5	Tb11.02.3710	hypothetical protein, conserved	5	5.6	143.97	1257	0.26624	109.22	-1.9092
>GeneDB|Tb11.02.2210 | organism=Trypanosoma_brucei_TREU927 | product=protein kinase A regulatory subunit | location=Tb927_11_01_v4:1302874-1304373(+) | length=499	1	35	Tb11.02.2210	protein kinase A regulatory subunit	35	79.2	56.734	499	0.26959	33.756	-1.89116
>GeneDB|Tb927.8.2080 | organism=Trypanosoma_brucei_TREU927 | product=hypothetical protein, conserved | location=Tb927_08_v4:656024-656584(+) | length=186	1	9	Tb927.8.2080	hypothetical protein, conserved	9	52.7	20.204	186	0.27229	21.872	-1.87678
>GeneDB|Tb927.10.12960 | organism=Trypanosoma_brucei_TREU927 | product=ras-related protein rab-5,small GTPase, putative | location=Tb927_10_v5:3150232-3150924(-) | length=230	1	9	Tb927.10.12960	ras-related protein rab-5,small GTPase, putative	9	57	24.484	230	0.27348	26.269	-1.87049
>GeneDB|Tb927.7.3490 | organism=Trypanosoma_brucei_TREU927 | product=synaptojanin (N-terminal domain), putative | location=Tb927_07_v4:902890-905352(-) | length=820	1	3	Tb927.7.3490	synaptojanin (N-terminal domain), putative	3	5.2	91.731	820	0.27389	37.113	-1.86833
>GeneDB|Tb927.6.4550 | organism=Trypanosoma_brucei_TREU927 | product=hypothetical protein, conserved | location=Tb927_06_v4:1272859-1275132(-) | length=757	1	10	Tb927.6.4550	hypothetical protein, conserved	10	19.7	85.241	757	0.27646	30.008	-1.85486
>GeneDB|Tb927.8.3790 | organism=Trypanosoma_brucei_TREU927 | product=paraflagellar rod component, putative | location=Tb927_08_v4:1128007-1128678(-) | length=223	1	9	Tb927.8.3790	paraflagellar rod component, putative	9	61.9	25.119	223	0.27719	30.896	-1.85105
>GeneDB|Tb927.4.760 | organism=Trypanosoma_brucei_TREU927 | product=gamma-adaptin 1, putative,AP-1 adapter complex gamma subunit, putative | location=Tb927_04_v4:208884-211289(-) | length=801	1	30	Tb927.4.760	gamma-adaptin 1, putative,AP-1 adapter complex gamma subunit, putative	30	49.4	87.344	801	0.27984	34.379	-1.83733
>GeneDB|Tb09.160.1120 | organism=Trypanosoma_brucei_TREU927 | product=hypothetical protein, conserved | location=Tb927_09_v4:513778-514410(-) | length=210	1	5	Tb09.160.1120	hypothetical protein, conserved	5	44.3	22.824	210	0.28015	31.251	-1.83573
>GeneDB|Tb927.1.1910 | organism=Trypanosoma_brucei_TREU927 | product=hypothetical protein, conserved | location=Tb927_01_v4:493801-497577(+) | length=1258	1	2	Tb927.1.1910	hypothetical protein, conserved	2	3.5	136.79	1258	0.28313	92.117	-1.82046
>GeneDB|Tb927.3.2960 | organism=Trypanosoma_brucei_TREU927 | product=inosine-adenosine-guanosine-nucleosidehydrolase,IAG-nucleoside hydrolase | location=Tb927_03_v4:763762-764745(-) | length=327	1	18	Tb927.3.2960	inosine-adenosine-guanosine-nucleosidehydrolase,IAG-nucleoside hydrolase	18	68.8	35.848	327	0.28325	35.536	-1.81985
>GeneDB|Tb927.5.1160 | organism=Trypanosoma_brucei_TREU927 | product=hypothetical protein, conserved | location=Tb927_05_v4:395802-396488(+) | length=228	1	16	Tb927.5.1160	hypothetical protein, conserved	16	66.7	25.569	228	0.28363	52.984	-1.81792
>GeneDB|Tb927.10.1170 | organism=Trypanosoma_brucei_TREU927 | product=intraflagellar transport protein IFT172, putative | location=Tb927_10_v5:312228-317471(-) | length=1747	1	81	Tb927.10.1170	intraflagellar transport protein IFT172, putative	81	57.2	196.6	1747	0.28368	40.529	-1.81766
>GeneDB|Tb11.02.0090 | organism=Trypanosoma_brucei_TREU927 | product=kinesin, putative,Unc104-like kinesin, putative | location=Tb927_11_01_v4:710989-715707(-) | length=1572	1	9	Tb11.02.0090	kinesin, putative,Unc104-like kinesin, putative	9	7.5	172.38	1572	0.28381	59.539	-1.817
>GeneDB|Tb927.8.3840 | organism=Trypanosoma_brucei_TREU927 | product=hypothetical protein, conserved | location=Tb927_08_v4:1143507-1145732(-) | length=741	1	19	Tb927.8.3840	hypothetical protein, conserved	19	38.2	80.049	741	0.28483	57.816	-1.81183
>GeneDB|Tb09.211.4240 | organism=Trypanosoma_brucei_TREU927 | product=phosphoinositide-binding protein, putative | location=Tb927_09_v4:2069005-2070264(-) | length=419	1	30	Tb09.211.4240	phosphoinositide-binding protein, putative	30	74.5	48.172	419	0.28629	44.915	-1.80445
>GeneDB|Tb11.01.1190 | organism=Trypanosoma_brucei_TREU927 | product=ATP synthase, putative | location=Tb927_11_01_v4:2528432-2529082(-) | length=216	1	11	Tb11.01.1190	ATP synthase, putative	11	61.6	24.788	216	0.28671	61.073	-1.80234
>GeneDB|Tb927.3.5090 | organism=Trypanosoma_brucei_TREU927 | product=tryparedoxin, putative | location=Tb927_03_v4:1429044-1429640(+) | length=198	1	9	Tb927.3.5090	tryparedoxin, putative	9	53.5	22.18	198	0.28874	14.151	-1.79216
>GeneDB|Tb11.02.5560 | organism=Trypanosoma_brucei_TREU927 | product=hypothetical protein, conserved | location=Tb927_11_01_v4:2118725-2120902(-) | length=725	1	6	Tb11.02.5560	hypothetical protein, conserved	6	9.2	81.262	725	0.28878	119.61	-1.79196
>GeneDB|Tb927.10.390 | organism=Trypanosoma_brucei_TREU927 | product=hypothetical protein, conserved | location=Tb927_10_v5:104432-104881(+) | length=149	1	7	Tb927.10.390	hypothetical protein, conserved	7	72.5	16.343	149	0.2888	46.572	-1.79186
>GeneDB|Tb11.02.4250 | organism=Trypanosoma_brucei_TREU927 | product=hypothetical protein, conserved | location=Tb927_11_01_v4:1773043-1773921(-) | length=292	1	12	Tb11.02.4250	hypothetical protein, conserved	12	61.3	32.852	292	0.29127	34.178	-1.77957
>GeneDB|Tb927.3.4510 | organism=Trypanosoma_brucei_TREU927 | product=hypothetical protein, conserved | location=Tb927_03_v4:1260457-1264452(-) | length=1331	1	2	Tb927.3.4510	hypothetical protein, conserved	2	2.3	150.91	1331	0.29141	16.767	-1.77888
>GeneDB|Tb11.01.7120 | organism=Trypanosoma_brucei_TREU927 | product=hypothetical protein, conserved | location=Tb927_11_01_v4:4055282-4055908(-) | length=208	1	13	Tb11.01.7120	hypothetical protein, conserved	13	58.2	23.085	208	0.29382	20.408	-1.767
>GeneDB|Tb927.8.5760 | organism=Trypanosoma_brucei_TREU927 | product=hypothetical protein, conserved | location=Tb927_08_v4:1701926-1703362(+) | length=478	1	10	Tb927.8.5760	hypothetical protein, conserved	10	29.9	53.809	478	0.29484	31.678	-1.762
>GeneDB|Tb927.6.1730 | organism=Trypanosoma_brucei_TREU927 | product=hypothetical protein, conserved | location=Tb927_06_v4:577689-581519(-) | length=1276	1	7	Tb927.6.1730	hypothetical protein, conserved	7	9.6	139.22	1276	0.29506	34.367	-1.76092
>GeneDB|Tb927.6.3500 | organism=Trypanosoma_brucei_TREU927 | product=endosomal trafficking protein RME-8, putative | location=Tb927_06_v4:1038472-1045182(-) | length=2236	1	65	Tb927.6.3500	endosomal trafficking protein RME-8, putative	65	41.9	253.87	2236	0.29651	44.377	-1.75385
>GeneDB|Tb927.10.4180 | organism=Trypanosoma_brucei_TREU927 | product=TFIIF-stimulated CTD phosphatase, putative | location=Tb927_10_v5:1100157-1100900(-) | length=247	1	15	Tb927.10.4180	TFIIF-stimulated CTD phosphatase, putative	15	73.3	28.189	247	0.29656	55.439	-1.7536
>GeneDB|Tb927.4.5010 | organism=Trypanosoma_brucei_TREU927 | product=calreticulin, putative | location=Tb927_04_v4:1372138-1373325(-) | length=395	1	2	Tb927.4.5010	calreticulin, putative	2	2.3	45.042	395	0.29698	24.794	-1.75156
>GeneDB|Tb927.10.200 | organism=Trypanosoma_brucei_TREU927 | product=vacuolar ATP synthase, putative | location=Tb927_10_v5:74522-75097(+) | length=191	1	2	Tb927.10.200	vacuolar ATP synthase, putative	2	11.5	19.38	191	0.29765	16.356	-1.74831
>GeneDB|Tb927.10.3760 | organism=Trypanosoma_brucei_TREU927 | product=vacuolar ATP synthase subunit d, putative | location=Tb927_10_v5:976942-977793(-) | length=283	1	11	Tb927.10.3760	vacuolar ATP synthase subunit d, putative	11	39.9	31.285	283	0.29845	28.75	-1.74444
>GeneDB|Tb927.6.5010 | organism=Trypanosoma_brucei_TREU927 | product=hypothetical protein, conserved | location=Tb927_06_v4:1373762-1374916(+) | length=384	1	3	Tb927.6.5010	hypothetical protein, conserved	3	17.4	40.797	384	0.30033	37.042	-1.73538
>GeneDB|Tb927.10.8040 | organism=Trypanosoma_brucei_TREU927 | product=adaptin complex 1 subunit, putative,beta-adaptin, fragment | location=Tb927_10_v5:2002232-2004319(-) | length=695	1	21	Tb927.10.8040	adaptin complex 1 subunit, putative,beta-adaptin, fragment	21	40.1	76.279	695	0.30107	38.522	-1.73183
>GeneDB|Tb927.7.3540 | organism=Trypanosoma_brucei_TREU927 | product=hypothetical protein, conserved | location=Tb927_07_v4:913456-914271(-) | length=271	1	4	Tb927.7.3540	hypothetical protein, conserved	4	16.2	29.572	271	0.30124	25.708	-1.73101
>GeneDB|Tb11.01.5890 | organism=Trypanosoma_brucei_TREU927 | product=septum formation protein MAF homologue, putative | location=Tb927_11_01_v4:3741070-3741681(+) | length=203	1	4	Tb11.01.5890	septum formation protein MAF homologue, putative	4	29.6	22.311	203	0.30513	57.379	-1.7125
>GeneDB|Tb11.02.5470 | organism=Trypanosoma_brucei_TREU927 | product=vacuolar type h ATPase subunit, putative | location=Tb927_11_01_v4:2098177-2098935(-) | length=252	1	1	Tb11.02.5470	vacuolar type h ATPase subunit, putative	1	6	26.323	252	0.30546	32.743	-1.71094
>GeneDB|Tb927.6.3550 | organism=Trypanosoma_brucei_TREU927 | product=phospholipid-translocating P-type ATPase (flippase), putative | location=Tb927_06_v4:1056159-1059749(-) | length=1196	1	2	Tb927.6.3550	phospholipid-translocating P-type ATPase (flippase), putative	2	3.3	132.56	1196	0.30682	85.975	-1.70454
>GeneDB|Tb927.3.960 | organism=Trypanosoma_brucei_TREU927 | product=protein transport protein Sec61 gamma subunit, putative | location=Tb927_03_v4:237829-238038(+) | length=69	1	2	Tb927.3.960	protein transport protein Sec61 gamma subunit, putative	2	43.5	7.6681	69	0.30728	16.884	-1.70237
>GeneDB|Tb927.6.860 | organism=Trypanosoma_brucei_TREU927 | product=hypothetical protein | location=Tb927_06_v4:367654-369990(-) | length=778	1	1	Tb927.6.860	hypothetical protein	1	2.1	85.62	778	0.30763	184.32	-1.70073
>GeneDB|Tb927.7.3180 | organism=Trypanosoma_brucei_TREU927 | product=Mu-adaptin 1, putative,adaptor complex AP-1 medium subunit, putative | location=Tb927_07_v4:820174-821472(+) | length=432	1	25	Tb927.7.3180	Mu-adaptin 1, putative,adaptor complex AP-1 medium subunit, putative	25	58.1	49.235	432	0.30782	40.399	-1.69984
>GeneDB|Tb927.10.14690 | organism=Trypanosoma_brucei_TREU927 | product=syntaxin, putative | location=Tb927_10_v5:3589288-3590259(-) | length=323	1	2	Tb927.10.14690	syntaxin, putative	2	7.7	36.556	323	0.30788	47.503	-1.69956
>GeneDB|Tb927.10.14990 | organism=Trypanosoma_brucei_TREU927 | product=intraflagellar transport protein IFT80/CHE2, putative | location=Tb927_10_v5:3663015-3665363(+) | length=782	1	32	Tb927.10.14990	intraflagellar transport protein IFT80/CHE2, putative	32	47.3	86.676	782	0.31012	29.97	-1.6891
>GeneDB|Tb927.6.1030 | organism=Trypanosoma_brucei_TREU927 | product=cysteine peptidase precursor,cysteine peptidase, Clan CA, family C1, Cathepsin L-like | location=Tb927_06_v4:417177-418526(-) | length=449;>GeneDB|Tb927.6.1040 | organism=Trypanosoma_brucei_TREU927 | product=cysteine peptidase precursor,cysteine peptidase, Clan CA, family C1, Cathepsin L-like | location=Tb927_06_v4:418938-420287…	2	1;1	Tb927.6.1030	cysteine peptidase precursor,cysteine peptidase, Clan CA, family C1, Cathepsin L-like	1	3.3	48.358	449	0.31019	20.033	-1.68878
>GeneDB|Tb09.160.0340 | organism=Trypanosoma_brucei_TREU927 | product=Nucleoporin | location=Tb927_09_v4:326363-328804(-) | length=813	1	4	Tb09.160.0340	Nucleoporin	4	6	92.363	813	0.31041	15.999	-1.68775
>GeneDB|Tb927.6.3940 | organism=Trypanosoma_brucei_TREU927 | product=hypothetical protein, conserved | location=Tb927_06_v4:1159007-1160101(-) | length=364	1	9	Tb927.6.3940	hypothetical protein, conserved	9	36.5	39.208	364	0.31267	52.321	-1.67729
>GeneDB|Tb927.10.15590 | organism=Trypanosoma_brucei_TREU927 | product=FKBP-type peptidyl-prolyl cis-trans isomerase, conserved,FKBP-type peptidylprolyl cis-trans isomerase, putative | location=Tb927_10_v5:3824554-3825144(+) | length=196	1	4	Tb927.10.15590	FKBP-type peptidyl-prolyl cis-trans isomerase, conserved,FKBP-type peptidylprolyl cis-trans isomerase, putative	4	30.1	21.394	196	0.31279	40.928	-1.67673
>GeneDB|Tb927.8.3010 | organism=Trypanosoma_brucei_TREU927 | product=hypothetical protein, conserved | location=Tb927_08_v4:903463-905676(+) | length=737	1	2	Tb927.8.3010	hypothetical protein, conserved	2	3.3	82.184	737	0.31293	122.18	-1.67609
>GeneDB|Tb927.10.14030 | organism=Trypanosoma_brucei_TREU927 | product=hypothetical protein, conserved | location=Tb927_10_v5:3417589-3418938(-) | length=449	1	13	Tb927.10.14030	hypothetical protein, conserved	13	33.4	50.474	449	0.31326	26.318	-1.67457
>GeneDB|Tb927.4.2230 | organism=Trypanosoma_brucei_TREU927 | product=dolichyl-P-Man:GDP-Man1GlcNAc2-PP-dolichyl alpha-1,3-mannosyltransferase, putative | location=Tb927_04_v4:579354-580883(+) | length=509	1	2	Tb927.4.2230	dolichyl-P-Man:GDP-Man1GlcNAc2-PP-dolichyl alpha-1,3-mannosyltransferase, putative	2	4.5	57.013	509	0.31331	43.735	-1.67434
>GeneDB|Tb11.02.0380 | organism=Trypanosoma_brucei_TREU927 | product=hypothetical protein, conserved | location=Tb927_11_01_v4:820993-823302(-) | length=769	1	9	Tb11.02.0380	hypothetical protein, conserved	9	16.8	83.077	769	0.3146	53.675	-1.66841
>GeneDB|Tb927.8.4370 | organism=Trypanosoma_brucei_TREU927 | product=hypothetical protein, conserved | location=Tb927_08_v4:1303070-1305802(-) | length=910	1	1	Tb927.8.4370	hypothetical protein, conserved	1	1.5	100.22	910	0.31648	56.857	-1.65981
>GeneDB|Tb927.3.4000 | organism=Trypanosoma_brucei_TREU927 | product=clathrin coat assembly protein ap19, putative | location=Tb927_03_v4:1121110-1121589(+) | length=159	1	4	Tb927.3.4000	clathrin coat assembly protein ap19, putative	4	33.3	18.409	159	0.31663	70.337	-1.65913
>GeneDB|Tb927.2.4410 | organism=Trypanosoma_brucei_TREU927 | product=hypothetical protein, conserved | location=Tb927_02_v4:783735-784409(-) | length=224	1	3	Tb927.2.4410	hypothetical protein, conserved	3	19.2	25.109	224	0.31678	30.383	-1.65845
>GeneDB|Tb927.10.11140 | organism=Trypanosoma_brucei_TREU927 | product=hypothetical protein, conserved | location=Tb927_10_v5:2721709-2726334(-) | length=1541	1	4	Tb927.10.11140	hypothetical protein, conserved	4	3.9	167.52	1541	0.31731	106.13	-1.65604
>GeneDB|Tb09.211.1230 | organism=Trypanosoma_brucei_TREU927 | product=hypothetical protein, conserved | location=Tb927_09_v4:1484078-1487035(-) | length=985	1	2	Tb09.211.1230	hypothetical protein, conserved	2	2	114.26	985	0.31813	69.387	-1.65231
>GeneDB|Tb927.1.4490 | organism=Trypanosoma_brucei_TREU927 | product=acetyltransferase, putative | location=Tb927_01_v4:928858-929376(+) | length=172	1	4	Tb927.1.4490	acetyltransferase, putative	4	32.6	19.682	172	0.31822	50.105	-1.6519
>GeneDB|Tb927.8.890 | organism=Trypanosoma_brucei_TREU927 | product=small GTP-binding protein Rab1, putative | location=Tb927_08_v4:266741-267367(-) | length=208;>GeneDB|Tb927.3.5750 | organism=Trypanosoma_brucei_TREU927 | product=retrotransposon hot spot protein (RHS, pseudogene), putative,retrotransposon hot spot protein (RHS), degenerate | location=Tb927_03_v4:1603691-1604365(-) | length=225;>…	3	13;1;1	Tb927.8.890	small GTP-binding protein Rab1, putative	13	71.6	22.714	208	0.31975	33.934	-1.64498
>GeneDB|Tb927.5.1300 | organism=Trypanosoma_brucei_TREU927 | product=vacuolar proton translocating ATPase subunit A, putative | location=Tb927_05_v4:424597-426948(+) | length=783	1	24	Tb927.5.1300	vacuolar proton translocating ATPase subunit A, putative	24	35.5	89.63	783	0.3208	22.273	-1.64025
>GeneDB|Tb927.1.1560 | organism=Trypanosoma_brucei_TREU927 | product=vesicular-fusion protein nsf, putative,N-ethylmaleimide sensitive factor (NsF) | location=Tb927_01_v4:399676-401853(+) | length=725;>GeneDB|Tb11.01.0200 | organism=Trypanosoma_brucei_TREU927 | product=katanin, putative,serine peptidase, Clan SJ, family S16, putative | location=Tb927_11_01_v4:2284668-2286332(+) | length=554	2	26;0	Tb927.1.1560	vesicular-fusion protein nsf, putative,N-ethylmaleimide sensitive factor (NsF)	26	44.7	79.953	725	0.32087	29.578	-1.63994
>GeneDB|Tb927.8.3520 | organism=Trypanosoma_brucei_TREU927 | product=hypothetical protein, conserved | location=Tb927_08_v4:1046956-1048728(+) | length=590	1	3	Tb927.8.3520	hypothetical protein, conserved	3	9	69.245	590	0.3213	87.115	-1.63801
>GeneDB|Tb927.10.6880 | organism=Trypanosoma_brucei_TREU927 | product=glyceraldehyde 3-phosphate dehydrogenase, cytosolic | location=Tb927_10_v5:1730120-1731115(+) | length=331	1	23	Tb927.10.6880	glyceraldehyde 3-phosphate dehydrogenase, cytosolic	23	72.5	35.61	331	0.32137	28.401	-1.63769
>GeneDB|Tb11.02.3950 | organism=Trypanosoma_brucei_TREU927 | product=ABC transporter, putative | location=Tb927_11_01_v4:1699442-1704658(-) | length=1738	1	2	Tb11.02.3950	ABC transporter, putative	2	1	192.41	1738	0.32389	99.991	-1.62642
>GeneDB|Tb927.5.2410 | organism=Trypanosoma_brucei_TREU927 | product=kinesin, putative | location=Tb927_05_v4:767934-771953(+) | length=1339	1	27	Tb927.5.2410	kinesin, putative	27	26.4	149.64	1339	0.32646	80.784	-1.61502
>GeneDB|Tb927.10.11680 | organism=Trypanosoma_brucei_TREU927 | product=chloride channel protein, putative | location=Tb927_10_v5:2853324-2856149(+) | length=941	1	2	Tb927.10.11680	chloride channel protein, putative	2	2.9	104.11	941	0.32885	72.166	-1.6045
>GeneDB|Tb09.160.3740 | organism=Trypanosoma_brucei_TREU927 | product=hypothetical protein, conserved | location=Tb927_09_v4:869709-870038(+) | length=109	1	2	Tb09.160.3740	hypothetical protein, conserved	2	27.5	12.201	109	0.32904	18.956	-1.60367
>GeneDB|Tb927.10.13860 | organism=Trypanosoma_brucei_TREU927 | product=GPI-anchor transamidase subunit 8 (GPI8) | location=Tb927_10_v5:3382594-3383553(-) | length=319	1	10	Tb927.10.13860	GPI-anchor transamidase subunit 8 (GPI8)	10	43.3	36.798	319	0.3302	38.143	-1.59859
>GeneDB|Tb09.211.4210 | organism=Trypanosoma_brucei_TREU927 | product=ubiquitin-protein ligase, putative | location=Tb927_09_v4:2060526-2066264(-) | length=1912	1	2	Tb09.211.4210	ubiquitin-protein ligase, putative	2	2.7	212.26	1912	0.33043	14.826	-1.59758
>GeneDB|Tb11.01.7400 | organism=Trypanosoma_brucei_TREU927 | product=GPI transamidase subunit Tta1 | location=Tb927_11_01_v4:4114606-4115739(-) | length=377	1	6	Tb11.01.7400	GPI transamidase subunit Tta1	6	18.8	41.915	377	0.33062	37.755	-1.59675
>GeneDB|Tb927.6.4280 | organism=Trypanosoma_brucei_TREU927 | product=glyceraldehyde 3-phosphate dehydrogenase, glycosomal | location=Tb927_06_v4:1218602-1219681(-) | length=359;>GeneDB|Tb927.6.4300 | organism=Trypanosoma_brucei_TREU927 | product=glyceraldehyde 3-phosphate dehydrogenase, glycosomal | location=Tb927_06_v4:1221204-1222283(-) | length=359;REV__>GeneDB|Tb927.7.3820 | organism=Trypanos…	5	33;33;1;0;0	Tb927.6.4280	glyceraldehyde 3-phosphate dehydrogenase, glycosomal	33	85.8	39.047	359	0.33185	37.896	-1.5914
>GeneDB|Tb927.8.3990 | organism=Trypanosoma_brucei_TREU927 | product=hypothetical protein, conserved | location=Tb927_08_v4:1190864-1191736(-) | length=290	1	1	Tb927.8.3990	hypothetical protein, conserved	1	7.6	32.72	290	0.33214	11.697	-1.59014
>GeneDB|Tb927.7.940 | organism=Trypanosoma_brucei_TREU927 | product=protein kinase C substrate protein, heavy chain, putative,glucosidase II beta subunit, putative | location=Tb927_07_v4:237819-239264(+) | length=481	1	12	Tb927.7.940	protein kinase C substrate protein, heavy chain, putative,glucosidase II beta subunit, putative	12	29.5	54.435	481	0.33259	34.522	-1.58818
>GeneDB|Tb927.10.12040 | organism=Trypanosoma_brucei_TREU927 | product=protein kinase, putative,mitogen-activated protein kinase 11, putative | location=Tb927_10_v5:2928033-2929274(+) | length=413	1	17	Tb927.10.12040	protein kinase, putative,mitogen-activated protein kinase 11, putative	17	58.1	47.389	413	0.33313	43.082	-1.58584
>GeneDB|Tb927.6.2250 | organism=Trypanosoma_brucei_TREU927 | product=rac serine-threonine kinase, putative,protein kinase, putative | location=Tb927_06_v4:709321-710697(+) | length=458	1	7	Tb927.6.2250	rac serine-threonine kinase, putative,protein kinase, putative	7	30.1	51.889	458	0.33322	22.184	-1.58545
>GeneDB|Tb11.01.0480 | organism=Trypanosoma_brucei_TREU927 | product=hypothetical protein, conserved | location=Tb927_11_01_v4:2204206-2205927(+) | length=573	1	11	Tb11.01.0480	hypothetical protein, conserved	11	24.3	63.596	573	0.33362	32.442	-1.58372
>GeneDB|Tb927.3.4670 | organism=Trypanosoma_brucei_TREU927 | product=cdc2-related kinase, putative,cell division control protein, putative | location=Tb927_03_v4:1321831-1323117(-) | length=428	1	2	Tb927.3.4670	cdc2-related kinase, putative,cell division control protein, putative	2	4.9	47.953	428	0.33411	28.147	-1.5816
>GeneDB|Tb09.211.3550 | organism=Trypanosoma_brucei_TREU927 | product=glycerol kinase, glycosomal | location=Tb927_09_v4:1920795-1922333(+) | length=512;>GeneDB|Tb09.211.3560 | organism=Trypanosoma_brucei_TREU927 | product=glycerol kinase, glycosomal | location=Tb927_09_v4:1924373-1925911(+) | length=512;>GeneDB|Tb09.211.3590 | organism=Trypanosoma_brucei_TREU927 | product=glycerol kinase, glycos…	5	45;44;44;43;42	Tb09.211.3550	glycerol kinase, glycosomal	45	75.8	56.365	512	0.3356	21.586	-1.57519
>GeneDB|Tb927.8.3470 | organism=Trypanosoma_brucei_TREU927 | product=hypothetical protein, conserved | location=Tb927_08_v4:1032469-1033173(+) | length=234	1	5	Tb927.8.3470	hypothetical protein, conserved	5	29.9	26.369	234	0.33653	19.706	-1.57119
>GeneDB|Tb927.6.3000 | organism=Trypanosoma_brucei_TREU927 | product=fatty acid desaturase, putative,sphingolipid delta 4 desaturase, putative | location=Tb927_06_v4:892527-893573(+) | length=348	1	3	Tb927.6.3000	fatty acid desaturase, putative,sphingolipid delta 4 desaturase, putative	3	7.2	40.62	348	0.33889	26.759	-1.56111
>GeneDB|Tb927.5.2190 | organism=Trypanosoma_brucei_TREU927 | product=hypothetical protein, conserved | location=Tb927_05_v4:694790-696130(+) | length=446;>GeneDB|Tb927.5.2220 | organism=Trypanosoma_brucei_TREU927 | product=hypothetical protein, conserved | location=Tb927_05_v4:698972-700312(+) | length=446;>GeneDB|Tb927.5.2250 | organism=Trypanosoma_brucei_TREU927 | product=hypothetical protein, …	3	11;11;11	Tb927.5.2190	hypothetical protein, conserved	11	30.7	48.809	446	0.34038	100.41	-1.55478
>GeneDB|Tb09.211.3180 | organism=Trypanosoma_brucei_TREU927 | product=6-phosphogluconate dehydrogenase, decarboxylating | location=Tb927_09_v4:1843482-1844921(+) | length=479	1	27	Tb09.211.3180	6-phosphogluconate dehydrogenase, decarboxylating	27	70.1	52.165	479	0.34056	44.615	-1.55402
>GeneDB|Tb927.8.2310 | organism=Trypanosoma_brucei_TREU927 | product=(H )-ATPase G subunit, putative | location=Tb927_08_v4:699549-699878(+) | length=109	1	7	Tb927.8.2310	(H )-ATPase G subunit, putative	7	61.5	12.749	109	0.34072	27.146	-1.55334
>GeneDB|Tb927.6.5050 | organism=Trypanosoma_brucei_TREU927 | product=V-type ATPase, C subunit, putative | location=Tb927_06_v4:1381837-1382511(+) | length=224	1	2	Tb927.6.5050	V-type ATPase, C subunit, putative	2	10.3	23.044	224	0.34231	29.35	-1.54662
>GeneDB|Tb927.7.5410 | organism=Trypanosoma_brucei_TREU927 | product=hypothetical protein, conserved | location=Tb927_07_v4:1453366-1456086(+) | length=906;>GeneDB|Tb927.7.5430 | organism=Trypanosoma_brucei_TREU927 | product=hypothetical protein, conserved | location=Tb927_07_v4:1459902-1462622(+) | length=906	2	2;2	Tb927.7.5410	hypothetical protein, conserved	2	2.1	98.859	906	0.34307	4.2004	-1.54343
>GeneDB|Tb927.5.2690 | organism=Trypanosoma_brucei_TREU927 | product=inositol-1(or 4)-monophosphatase 1, putative | location=Tb927_05_v4:855381-856232(+) | length=283	1	2	Tb927.5.2690	inositol-1(or 4)-monophosphatase 1, putative	2	9.2	30.656	283	0.34385	2.7032	-1.54015
>GeneDB|Tb927.10.210 | organism=Trypanosoma_brucei_TREU927 | product=GPI transamidase component GAA1 | location=Tb927_10_v5:75527-76912(+) | length=461	1	4	Tb927.10.210	GPI transamidase component GAA1	4	10.2	51.313	461	0.34555	13.191	-1.53303
>GeneDB|Tb927.2.2720 | organism=Trypanosoma_brucei_TREU927 | product=protein kinase, putative | location=Tb927_02_v4:533630-538135(+) | length=1501	1	2	Tb927.2.2720	protein kinase, putative	2	3.3	162.18	1501	0.34658	49.357	-1.52874
>GeneDB|Tb11.01.5490 | organism=Trypanosoma_brucei_TREU927 | product=kinesin-II 85 Kd subunit, putative | location=Tb927_11_01_v4:3633956-3637303(+) | length=1115;>GeneDB|Tb927.3.2040 | organism=Trypanosoma_brucei_TREU927 | product=kinesin, putative | location=Tb927_03_v4:529762-532980(-) | length=1072	2	27;1	Tb11.01.5490	kinesin-II 85 Kd subunit, putative	27	37.7	127.47	1115	0.34882	58.199	-1.51945
>GeneDB|Tb927.5.550 | organism=Trypanosoma_brucei_TREU927 | product=vacuolar ATP synthase, putative | location=Tb927_05_v4:171493-172644(-) | length=383	1	12	Tb927.5.550	vacuolar ATP synthase, putative	12	55.4	42.849	383	0.34951	55.717	-1.51659
>GeneDB|Tb927.4.560 | organism=Trypanosoma_brucei_TREU927 | product=dynein heavy chain, putative | location=Tb927_04_v4:151879-164577(-) | length=4232	1	119	Tb927.4.560	dynein heavy chain, putative	119	37	479.84	4232	0.35065	52.585	-1.5119
>GeneDB|Tb11.02.4100 | organism=Trypanosoma_brucei_TREU927 | product=pretranslocation protein, alpha subunit, putative,SEC61-like (pretranslocation process) protein, putative | location=Tb927_11_01_v4:1729920-1731365(-) | length=481	1	10	Tb11.02.4100	pretranslocation protein, alpha subunit, putative,SEC61-like (pretranslocation process) protein, putative	10	17.5	53.647	481	0.35109	43.974	-1.51009
>GeneDB|Tb927.10.840 | organism=Trypanosoma_brucei_TREU927 | product=hypothetical protein, conserved | location=Tb927_10_v5:218290-223449(+) | length=1719	1	28	Tb927.10.840	hypothetical protein, conserved	28	24	195.48	1719	0.35205	46.829	-1.50615
>GeneDB|Tb11.02.1690 | organism=Trypanosoma_brucei_TREU927 | product=hypothetical protein, conserved | location=Tb927_11_01_v4:1208865-1210757(-) | length=630	1	21	Tb11.02.1690	hypothetical protein, conserved	21	48.9	69.793	630	0.35571	25.495	-1.49123
>GeneDB|Tb927.3.4640 | organism=Trypanosoma_brucei_TREU927 | product=hypothetical protein, conserved | location=Tb927_03_v4:1315526-1316362(-) | length=278	1	5	Tb927.3.4640	hypothetical protein, conserved	5	18.3	30.378	278	0.35645	22.812	-1.48823
>GeneDB|Tb11.01.4310 | organism=Trypanosoma_brucei_TREU927 | product=hypothetical protein, conserved | location=Tb927_11_01_v4:3272220-3278807(+) | length=2195	1	1	Tb11.01.4310	hypothetical protein, conserved	1	1.4	238.27	2195	0.35764	61.889	-1.48342
>GeneDB|Tb927.5.4560 | organism=Trypanosoma_brucei_TREU927 | product=guanine deaminase, putative,guanase, putative,guanine aminase, putative,guanine aminohydrolase, putative | location=Tb927_05_v4:1353743-1355293(+) | length=516	1	16	Tb927.5.4560	guanine deaminase, putative,guanase, putative,guanine aminase, putative,guanine aminohydrolase, putative	16	40.7	55.321	516	0.35946	93.734	-1.4761
>GeneDB|Tb11.01.8570 | organism=Trypanosoma_brucei_TREU927 | product=dynein light intermediate chain D1bLIC, putative | location=Tb927_11_01_v4:4415889-4417145(-) | length=418	1	11	Tb11.01.8570	dynein light intermediate chain D1bLIC, putative	11	32.8	45.168	418	0.36008	25.718	-1.47361
>GeneDB|Tb927.2.5010 | organism=Trypanosoma_brucei_TREU927 | product=hypothetical protein, conserved | location=Tb927_02_v4:886021-887523(-) | length=500	1	2	Tb927.2.5010	hypothetical protein, conserved	2	5.6	55.098	500	0.36134	91.408	-1.46857
>GeneDB|Tb927.8.6430 | organism=Trypanosoma_brucei_TREU927 | product=hypothetical protein, conserved | location=Tb927_08_v4:1862445-1862762(+) | length=105	1	5	Tb927.8.6430	hypothetical protein, conserved	5	56.2	11.709	105	0.36187	19.642	-1.46646
>GeneDB|Tb927.7.4480 | organism=Trypanosoma_brucei_TREU927 | product=adenosine 5'-monophosphoramidase, putative | location=Tb927_07_v4:1191811-1192236(-) | length=141	1	10	Tb927.7.4480	adenosine 5'-monophosphoramidase, putative	10	73.8	15.55	141	0.36331	19.104	-1.46073
>GeneDB|Tb927.8.2380 | organism=Trypanosoma_brucei_TREU927 | product=ABC transporter, putative | location=Tb927_08_v4:713071-716547(+) | length=1158	1	4	Tb927.8.2380	ABC transporter, putative	4	5.5	126.93	1158	0.36537	47.616	-1.45257
>GeneDB|Tb927.6.3290 | organism=Trypanosoma_brucei_TREU927 | product=intraflagellar transport protein 20, putative | location=Tb927_06_v4:972730-973122(+) | length=130	1	7	Tb927.6.3290	intraflagellar transport protein 20, putative	7	61.5	15.419	130	0.36647	45.691	-1.44823
>GeneDB|Tb927.3.3300 | organism=Trypanosoma_brucei_TREU927 | product=hypothetical protein, conserved | location=Tb927_03_v4:848227-850671(-) | length=814	1	30	Tb927.3.3300	hypothetical protein, conserved	30	42.4	89.197	814	0.36672	65.433	-1.44725
>GeneDB|Tb11.01.3670 | organism=Trypanosoma_brucei_TREU927 | product=hypothetical protein, conserved | location=Tb927_11_01_v4:3101292-3104576(+) | length=1094	1	3	Tb11.01.3670	hypothetical protein, conserved	3	6.7	118.25	1094	0.36676	102.08	-1.44709
>GeneDB|Tb11.02.0030 | organism=Trypanosoma_brucei_TREU927 | product=dynein heavy chain, putative | location=Tb927_11_01_v4:685095-698018(-) | length=4307;>CON_ENSBTAP00000001528 (Bos taurus) similar to intersectin long isoform 4;CON__ENSEMBL:ENSBTAP00000001528;REV__>GeneDB|Tb927.5.2310 | organism=Trypanosoma_brucei_TREU927 | product=hypothetical protein, conserved | location=Tb927_05_v4:721343-7…	4	112;0;0;0	Tb11.02.0030	dynein heavy chain, putative	112	36.6	484.96	4307	0.36757	45.631	-1.44391
>GeneDB|Tb927.8.1320 | organism=Trypanosoma_brucei_TREU927 | product=hypothetical protein, conserved | location=Tb927_08_v4:427285-428007(-) | length=240	1	5	Tb927.8.1320	hypothetical protein, conserved	5	27.5	27.16	240	0.36842	57.312	-1.44058
>GeneDB|Tb927.10.11310 | organism=Trypanosoma_brucei_TREU927 | product=intraflagellar transport protein IFT55/IFT57, putative | location=Tb927_10_v5:2761335-2762576(+) | length=413	1	15	Tb927.10.11310	intraflagellar transport protein IFT55/IFT57, putative	15	53.3	46.366	413	0.3691	21.222	-1.43792
>GeneDB|Tb927.5.1810 | organism=Trypanosoma_brucei_TREU927 | product=lysosomal/endosomal membrane protein p67 | location=Tb927_05_v4:561028-563007(+) | length=659;>GeneDB|Tb927.5.1830 | organism=Trypanosoma_brucei_TREU927 | product=lysosomal/endosomal membrane protein p67,lysosomal membrane glycoprotein | location=Tb927_05_v4:565098-567083(+) | length=661	2	25;23	Tb927.5.1810	lysosomal/endosomal membrane protein p67	25	55.2	72.732	659	0.36943	83.535	-1.43663
>GeneDB|Tb927.3.5540 | organism=Trypanosoma_brucei_TREU927 | product=dynein intermediate chain WDRD34, putative | location=Tb927_03_v4:1556101-1557705(+) | length=534	1	12	Tb927.3.5540	dynein intermediate chain WDRD34, putative	12	32.6	58.074	534	0.3726	47.886	-1.4243
>GeneDB|Tb927.6.4320 | organism=Trypanosoma_brucei_TREU927 | product=hypothetical protein, conserved | location=Tb927_06_v4:1223763-1224962(-) | length=399	1	12	Tb927.6.4320	hypothetical protein, conserved	12	35.8	44.423	399	0.37313	31.396	-1.42225
>GeneDB|Tb927.5.3560 | organism=Trypanosoma_brucei_TREU927 | product=vesicle-associated membrane protein, putative,synaptobrevin, putative | location=Tb927_05_v4:1117162-1117812(+) | length=216	1	10	Tb927.5.3560	vesicle-associated membrane protein, putative,synaptobrevin, putative	10	66.2	24.402	216	0.37378	26.662	-1.41974
>GeneDB|Tb927.2.5660 | organism=Trypanosoma_brucei_TREU927 | product=adenylate kinase, putative | location=Tb927_02_v4:1021719-1022501(+) | length=260	1	18	Tb927.2.5660	adenylate kinase, putative	18	56.9	29.339	260	0.37462	27.69	-1.4165
>GeneDB|Tb11.02.5460 | organism=Trypanosoma_brucei_TREU927 | product=hypothetical protein, conserved | location=Tb927_11_01_v4:2096554-2097297(-) | length=247	1	11	Tb11.02.5460	hypothetical protein, conserved	11	74.9	26.198	247	0.37806	24.108	-1.40331
>GeneDB|Tb927.8.3530 | organism=Trypanosoma_brucei_TREU927 | product=glycerol-3-phosphate dehydrogenase [NAD ], glycosomal | location=Tb927_08_v4:1057582-1058646(-) | length=354	1	25	Tb927.8.3530	glycerol-3-phosphate dehydrogenase [NAD ], glycosomal	25	71.5	37.805	354	0.38036	52.157	-1.39456
>GeneDB|Tb09.211.1350 | organism=Trypanosoma_brucei_TREU927 | product=peptidyl-prolyl cis-trans isomerase (cyclophilin- 40), putative,cyclophilin-40, putative | location=Tb927_09_v4:1504694-1505758(-) | length=354	1	12	Tb09.211.1350	peptidyl-prolyl cis-trans isomerase (cyclophilin- 40), putative,cyclophilin-40, putative	12	47.2	38.095	354	0.38061	25.333	-1.39361
>GeneDB|Tb927.10.14740 | organism=Trypanosoma_brucei_TREU927 | product=hypothetical protein, conserved | location=Tb927_10_v5:3596820-3597977(-) | length=385;>GeneDB|Tb927.10.14620 | organism=Trypanosoma_brucei_TREU927 | product=hypothetical protein, conserved | location=Tb927_10_v5:3580775-3581932(-) | length=385	2	13;13	Tb927.10.14740	hypothetical protein, conserved	13	44.9	44.177	385	0.3809	26.929	-1.39252
>GeneDB|Tb927.3.1110 | organism=Trypanosoma_brucei_TREU927 | product=flagellar transport protein, putative | location=Tb927_03_v4:270798-272231(+) | length=477	1	14	Tb927.3.1110	flagellar transport protein, putative	14	36.9	52.713	477	0.38137	33.773	-1.39074
>GeneDB|Tb927.5.4390 | organism=Trypanosoma_brucei_TREU927 | product=hypothetical protein, conserved | location=Tb927_05_v4:1306382-1306789(-) | length=135	1	5	Tb927.5.4390	hypothetical protein, conserved	5	45.2	15.063	135	0.38205	37.711	-1.38817
>GeneDB|Tb927.1.3390 | organism=Trypanosoma_brucei_TREU927 | product=hypothetical protein, conserved | location=Tb927_01_v4:732009-732497(-) | length=162	1	2	Tb927.1.3390	hypothetical protein, conserved	2	14.2	17.88	162	0.38352	22.915	-1.38263
>GeneDB|Tb11.02.0815 | organism=Trypanosoma_brucei_TREU927 | product=ubiquitin-conjugating enzyme, putative,ubiquitin-conjugating enzyme-like protein, putative | location=Tb927_11_01_v4:948990-949406(+) | length=138	1	7	Tb11.02.0815	ubiquitin-conjugating enzyme, putative,ubiquitin-conjugating enzyme-like protein, putative	7	64.5	15.654	138	0.38496	20.358	-1.37722
>GeneDB|Tb927.3.2840 | organism=Trypanosoma_brucei_TREU927 | product=inorganic pyrophosphatase, putative | location=Tb927_03_v4:736076-736861(-) | length=261	1	4	Tb927.3.2840	inorganic pyrophosphatase, putative	4	29.5	28.675	261	0.38603	31.642	-1.37322
>GeneDB|Tb09.160.2470 | organism=Trypanosoma_brucei_TREU927 | product=hypothetical protein, conserved | location=Tb927_09_v4:710026-712140(+) | length=704	1	3	Tb09.160.2470	hypothetical protein, conserved	3	8.5	79.857	704	0.38623	27.897	-1.37247
>GeneDB|Tb927.7.4700 | organism=Trypanosoma_brucei_TREU927 | product=hypothetical protein, conserved | location=Tb927_07_v4:1250185-1252281(-) | length=698	1	29	Tb927.7.4700	hypothetical protein, conserved	29	53.7	77.7	698	0.38672	21.629	-1.37064
>GeneDB|Tb09.211.3390 | organism=Trypanosoma_brucei_TREU927 | product=hypothetical protein, conserved | location=Tb927_09_v4:1882626-1884110(+) | length=494	1	2	Tb09.211.3390	hypothetical protein, conserved	2	7.9	54.443	494	0.38708	0.89933	-1.3693
>GeneDB|Tb09.160.2180 | organism=Trypanosoma_brucei_TREU927 | product=hypothetical protein, conserved | location=Tb927_09_v4:668766-669566(+) | length=266	1	2	Tb09.160.2180	hypothetical protein, conserved	2	12.4	30.102	266	0.38709	48.003	-1.36926
>GeneDB|Tb927.8.8120 | organism=Trypanosoma_brucei_TREU927 | product=hypothetical protein, conserved | location=Tb927_08_v4:2399860-2400666(+) | length=268	1	5	Tb927.8.8120	hypothetical protein, conserved	5	27.6	30.085	268	0.38757	29.455	-1.36747
>GeneDB|Tb927.4.1220 | organism=Trypanosoma_brucei_TREU927 | product=leucine-rich repeat protein (LRRP), putative | location=Tb927_04_v4:328278-329060(-) | length=260	1	6	Tb927.4.1220	leucine-rich repeat protein (LRRP), putative	6	25	28.975	260	0.38873	21.344	-1.36316
>GeneDB|Tb927.5.1460 | organism=Trypanosoma_brucei_TREU927 | product=hypothetical protein, conserved | location=Tb927_05_v4:464539-465519(-) | length=326	1	13	Tb927.5.1460	hypothetical protein, conserved	13	49.1	36.762	326	0.38916	53.475	-1.36156
>GeneDB|Tb927.8.800 | organism=Trypanosoma_brucei_TREU927 | product=hypothetical protein, conserved | location=Tb927_08_v4:224410-231003(-) | length=2197	1	5	Tb927.8.800	hypothetical protein, conserved	5	3.5	246.72	2197	0.38978	21.957	-1.35927
>GeneDB|Tb11.01.2410 | organism=Trypanosoma_brucei_TREU927 | product=DNA-(apurinic or apyrimidinic site) lyase, putative | location=Tb927_11_01_v4:2780218-2781936(+) | length=572	1	2	Tb11.01.2410	DNA-(apurinic or apyrimidinic site) lyase, putative	2	6.8	63.761	572	0.38998	18.959	-1.35853
>GeneDB|Tb09.211.1550 | organism=Trypanosoma_brucei_TREU927 | product=chaperone protein DNAj, putative | location=Tb927_09_v4:1532814-1534286(-) | length=490	1	13	Tb09.211.1550	chaperone protein DNAj, putative	13	35.7	56.711	490	0.39078	25.985	-1.35557
>GeneDB|Tb11.02.5550 | organism=Trypanosoma_brucei_TREU927 | product=hypothetical protein, conserved,predicted WD40 repeat protein | location=Tb927_11_01_v4:2115397-2117286(-) | length=629	1	33	Tb11.02.5550	hypothetical protein, conserved,predicted WD40 repeat protein	33	66.1	67.695	629	0.39116	26.447	-1.35417
>GeneDB|Tb927.6.3100 | organism=Trypanosoma_brucei_TREU927 | product=hypothetical protein, conserved | location=Tb927_06_v4:918201-919508(+) | length=435	1	13	Tb927.6.3100	hypothetical protein, conserved	13	57	48.134	435	0.39168	28.354	-1.35225
>GeneDB|Tb09.160.0620 | organism=Trypanosoma_brucei_TREU927 | product=peroxisomal membrane protein 4, putative | location=Tb927_09_v4:383453-384376(-) | length=307	1	2	Tb09.160.0620	peroxisomal membrane protein 4, putative	2	10.7	34.539	307	0.39253	12.253	-1.34913
>GeneDB|Tb927.10.2470 | organism=Trypanosoma_brucei_TREU927 | product=hypothetical protein, conserved | location=Tb927_10_v5:640940-642592(+) | length=550	1	3	Tb927.10.2470	hypothetical protein, conserved	3	9.1	64.233	550	0.39453	23.63	-1.34179
>GeneDB|Tb927.10.12940 | organism=Trypanosoma_brucei_TREU927 | product=hypothetical protein, conserved,predicted zinc finger protein | location=Tb927_10_v5:3145406-3146380(-) | length=324	1	8	Tb927.10.12940	hypothetical protein, conserved,predicted zinc finger protein	8	32.1	34.477	324	0.39454	24.692	-1.34176
>GeneDB|Tb927.10.1040 | organism=Trypanosoma_brucei_TREU927 | product=serine carboxypeptidase III precursor, putative,serine carboxypeptidase (CBP1) precursor, putative,serine peptidase, Clan SC, Family S10 | location=Tb927_10_v5:280857-282251(-) | length=464;>GeneDB|Tb927.10.1050 | organism=Trypanosoma_brucei_TREU927 | product=serine carboxypeptidase III precursor, putative,serine peptidase, Cla…	2	3;2	Tb927.10.1040	serine carboxypeptidase III precursor, putative,serine carboxypeptidase (CBP1) precursor, putative,serine peptidase, Clan SC, Family S10	3	10.1	51.509	464	0.39616	171	-1.33584
>GeneDB|Tb09.160.5530 | organism=Trypanosoma_brucei_TREU927 | product=hypothetical protein, conserved | location=Tb927_09_v4:1184274-1185314(-) | length=346;REV__>REV_GeneDB|Tb11.v4.0031 Reverse sequence, was | organism=Trypanosoma_brucei_TREU927 | product=variant surface glycoprotein (VSG, pseudogene), putative | location=Tb927_11_02_v4:126060-127520(-) | length=487	2	29;1	Tb09.160.5530	hypothetical protein, conserved	29	89.3	38.016	346	0.39687	39.519	-1.33326
>GeneDB|Tb927.10.730 | organism=Trypanosoma_brucei_TREU927 | product=ATP synthase, putative | location=Tb927_10_v5:187414-188820(+) | length=468	1	12	Tb927.10.730	ATP synthase, putative	12	36.3	52.901	468	0.39813	20.863	-1.32869
>GeneDB|Tb927.3.5490 | organism=Trypanosoma_brucei_TREU927 | product=flagellar transport protein, putative | location=Tb927_03_v4:1535250-1537319(+) | length=675	1	21	Tb927.3.5490	flagellar transport protein, putative	21	46.4	77.659	675	0.39862	24.166	-1.32691
>GeneDB|Tb927.10.2640 | organism=Trypanosoma_brucei_TREU927 | product=intraflagellar transport protein IFT81, putative | location=Tb927_10_v5:681379-683601(+) | length=740	1	47	Tb927.10.2640	intraflagellar transport protein IFT81, putative	47	65.8	84.645	740	0.3989	26.209	-1.3259
>GeneDB|Tb927.7.1300 | organism=Trypanosoma_brucei_TREU927 | product=protein disulfide isomerase, putative | location=Tb927_07_v4:334736-335869(+) | length=377	1	29	Tb927.7.1300	protein disulfide isomerase, putative	29	71.4	41.939	377	0.40267	29.232	-1.31233
>GeneDB|Tb11.01.1630 | organism=Trypanosoma_brucei_TREU927 | product=hypothetical protein, conserved | location=Tb927_11_01_v4:2610859-2612061(+) | length=400	1	1	Tb11.01.1630	hypothetical protein, conserved	1	4	44.629	400	0.40303	11.965	-1.31104
>GeneDB|Tb11.55.0006 | organism=Trypanosoma_brucei_TREU927 | product=intraflagellar transport protein IFT88 | location=Tb927_11_01_v4:506598-509000(-) | length=800	1	39	Tb11.55.0006	intraflagellar transport protein IFT88	39	60.9	89.754	800	0.40317	59.892	-1.31054
>GeneDB|Tb11.01.4701 | organism=Trypanosoma_brucei_TREU927 | product=membrane-bound acid phosphatase 1 precursor | location=Tb927_11_01_v4:3458150-3459724(-) | length=524	1	6	Tb11.01.4701	membrane-bound acid phosphatase 1 precursor	6	16	59.376	524	0.40389	21.954	-1.30797
>GeneDB|Tb11.02.4670 | organism=Trypanosoma_brucei_TREU927 | product=hypothetical protein, conserved | location=Tb927_11_01_v4:1905731-1907365(-) | length=544	1	2	Tb11.02.4670	hypothetical protein, conserved	2	6.8	62.897	544	0.40517	29.95	-1.3034
>GeneDB|Tb927.4.1920 | organism=Trypanosoma_brucei_TREU927 | product=GPI transamidase, putative | location=Tb927_04_v4:488068-490128(-) | length=686	1	12	Tb927.4.1920	GPI transamidase, putative	12	24.1	75.806	686	0.40535	38.842	-1.30276
>GeneDB|Tb927.7.1190 | organism=Trypanosoma_brucei_TREU927 | product=regulator of chromosome condensation, putative | location=Tb927_07_v4:302109-305567(+) | length=1152	1	2	Tb927.7.1190	regulator of chromosome condensation, putative	2	2.4	123.85	1152	0.40585	31.281	-1.30098
>GeneDB|Tb927.7.3420 | organism=Trypanosoma_brucei_TREU927 | product=peptidyl-prolyl cis-trans isomerase, putative | location=Tb927_07_v4:889037-889375(-) | length=112	1	6	Tb927.7.3420	peptidyl-prolyl cis-trans isomerase, putative	6	52.7	12.282	112	0.40681	58.917	-1.29757
>GeneDB|Tb11.50.0006 | organism=Trypanosoma_brucei_TREU927 | product=epsinR | location=Tb927_11_01_v4:163964-165481(-) | length=505	1	13	Tb11.50.0006	epsinR	13	33.9	55.266	505	0.40688	17.627	-1.29732
>GeneDB|Tb927.6.3020 | organism=Trypanosoma_brucei_TREU927 | product=hypothetical protein, conserved | location=Tb927_06_v4:898968-899834(+) | length=288	1	2	Tb927.6.3020	hypothetical protein, conserved	2	11.5	32.217	288	0.40846	93.742	-1.29173
>GeneDB|Tb11.02.0850 | organism=Trypanosoma_brucei_TREU927 | product=phospholipid-transporting ATPase 1-like protein, putative | location=Tb927_11_01_v4:959427-962813(+) | length=1128	1	2	Tb11.02.0850	phospholipid-transporting ATPase 1-like protein, putative	2	1.6	126.55	1128	0.4085	26.907	-1.29159
>GeneDB|Tb927.7.5830 | organism=Trypanosoma_brucei_TREU927 | product=hypothetical protein, conserved | location=Tb927_07_v4:1573658-1573978(+) | length=106	1	2	Tb927.7.5830	hypothetical protein, conserved	2	40.6	11.775	106	0.40935	121.06	-1.28859
>GeneDB|Tb09.211.0290 | organism=Trypanosoma_brucei_TREU927 | product=hypothetical protein, conserved | location=Tb927_09_v4:1311754-1313568(-) | length=604	1	8	Tb09.211.0290	hypothetical protein, conserved	8	17.7	66.853	604	0.40965	46.665	-1.28754
>GeneDB|Tb11.03.0230 | organism=Trypanosoma_brucei_TREU927 | product=isocitrate dehydrogenase, putative | location=Tb927_11_01_v4:230573-231814(+) | length=413	1	26	Tb11.03.0230	isocitrate dehydrogenase, putative	26	67.1	46.77	413	0.40967	30.373	-1.28747
>GeneDB|Tb927.8.7410 | organism=Trypanosoma_brucei_TREU927 | product=calreticulin, putative | location=Tb927_08_v4:2134955-2136142(+) | length=395	1	2	Tb927.8.7410	calreticulin, putative	2	7.8	45.021	395	0.41213	61.188	-1.27883
>GeneDB|Tb927.10.450 | organism=Trypanosoma_brucei_TREU927 | product=hypothetical protein, conserved | location=Tb927_10_v5:116855-118612(+) | length=585	1	21	Tb927.10.450	hypothetical protein, conserved	21	49.1	65.63	585	0.41263	38.166	-1.27708
>GeneDB|Tb927.6.1540 | organism=Trypanosoma_brucei_TREU927 | product=hypothetical protein, conserved | location=Tb927_06_v4:537026-538186(-) | length=386	1	2	Tb927.6.1540	hypothetical protein, conserved	2	3.9	42.208	386	0.41388	72.439	-1.27272
>GeneDB|Tb927.7.550 | organism=Trypanosoma_brucei_TREU927 | product=hypothetical protein, conserved | location=Tb927_07_v4:112314-113813(-) | length=499	1	6	Tb927.7.550	hypothetical protein, conserved	6	15.8	55.627	499	0.41507	48.99	-1.26857
>GeneDB|Tb927.4.4700 | organism=Trypanosoma_brucei_TREU927 | product=hypothetical protein, conserved | location=Tb927_04_v4:1294015-1294824(-) | length=269	1	19	Tb927.4.4700	hypothetical protein, conserved	19	72.5	30.771	269	0.41611	36.086	-1.26496
>GeneDB|Tb927.4.1080 | organism=Trypanosoma_brucei_TREU927 | product=V-type ATPase, A subunit, putative | location=Tb927_04_v4:288344-290176(-) | length=610	1	32	Tb927.4.1080	V-type ATPase, A subunit, putative	32	64.8	67.749	610	0.41634	30.388	-1.26417
>GeneDB|Tb927.6.4260 | organism=Trypanosoma_brucei_TREU927 | product=hypothetical protein, conserved | location=Tb927_06_v4:1215572-1216543(-) | length=323	1	3	Tb927.6.4260	hypothetical protein, conserved	3	16.1	34.251	323	0.41683	19.762	-1.26247
>GeneDB|Tb927.10.14980 | organism=Trypanosoma_brucei_TREU927 | product=intraflagellar transport protein IFT52, putative | location=Tb927_10_v5:3658942-3660909(+) | length=655	1	24	Tb927.10.14980	intraflagellar transport protein IFT52, putative	24	44.6	72.377	655	0.41742	34.08	-1.26043
>GeneDB|Tb927.10.2410 | organism=Trypanosoma_brucei_TREU927 | product=MSP-C, putative | location=Tb927_10_v5:620835-622610(-) | length=591	1	2	Tb927.10.2410	MSP-C, putative	2	3.9	65.688	591	0.41863	23.485	-1.25625
>GeneDB|Tb927.3.3000 | organism=Trypanosoma_brucei_TREU927 | product=flagellar transport protein, putative | location=Tb927_03_v4:769760-771460(-) | length=566	1	19	Tb927.3.3000	flagellar transport protein, putative	19	44.9	64.892	566	0.41937	53.09	-1.2537
>GeneDB|Tb927.10.9700 | organism=Trypanosoma_brucei_TREU927 | product=hypothetical protein, conserved,predicted C2 domain protein | location=Tb927_10_v5:2398220-2401765(+) | length=1181	1	16	Tb927.10.9700	hypothetical protein, conserved,predicted C2 domain protein	16	18.7	132.58	1181	0.4197	36.411	-1.25257
>GeneDB|Tb11.01.2930 | organism=Trypanosoma_brucei_TREU927 | product=hypothetical protein | location=Tb927_11_01_v4:2923307-2926285(+) | length=992	1	8	Tb11.01.2930	hypothetical protein	8	10.2	108.85	992	0.42032	49.021	-1.25044
>GeneDB|Tb927.10.15500 | organism=Trypanosoma_brucei_TREU927 | product=SNARE protein, putative | location=Tb927_10_v5:3805073-3805786(+) | length=237	1	1	Tb927.10.15500	SNARE protein, putative	1	7.6	26.528	237	0.42035	12.211	-1.25034
>GeneDB|Tb11.02.1120 | organism=Trypanosoma_brucei_TREU927 | product=adenylosuccinate synthetase, putative | location=Tb927_11_01_v4:1055003-1056811(+) | length=602	1	43	Tb11.02.1120	adenylosuccinate synthetase, putative	43	73.1	66.674	602	0.42061	35.762	-1.24944
>GeneDB|Tb09.211.1390 | organism=Trypanosoma_brucei_TREU927 | product=hypothetical protein, conserved | location=Tb927_09_v4:1511522-1513684(-) | length=720	1	30	Tb09.211.1390	hypothetical protein, conserved	30	45.8	79.857	720	0.42188	32.817	-1.2451
>GeneDB|Tb927.3.4800 | organism=Trypanosoma_brucei_TREU927 | product=hypothetical protein, conserved | location=Tb927_03_v4:1352639-1354498(-) | length=619	1	4	Tb927.3.4800	hypothetical protein, conserved	4	6.5	69.268	619	0.42355	59.878	-1.2394
>GeneDB|Tb927.7.3370 | organism=Trypanosoma_brucei_TREU927 | product=hypothetical protein, conserved | location=Tb927_07_v4:880136-881926(-) | length=596	1	39	Tb927.7.3370	hypothetical protein, conserved	39	61.1	67.485	596	0.42513	27.101	-1.23402
>GeneDB|Tb927.4.2350 | organism=Trypanosoma_brucei_TREU927 | product=G-actin binding protein, putative,twinfilin, putative | location=Tb927_04_v4:608837-609799(+) | length=320	1	6	Tb927.4.2350	G-actin binding protein, putative,twinfilin, putative	6	27.5	34.766	320	0.42577	25.124	-1.23185
>GeneDB|Tb11.01.7450 | organism=Trypanosoma_brucei_TREU927 | product=hypothetical protein, conserved | location=Tb927_11_01_v4:4122517-4124898(-) | length=793	1	11	Tb11.01.7450	hypothetical protein, conserved	11	16.1	89.585	793	0.42718	18.747	-1.22708
>GeneDB|Tb927.10.14150 | organism=Trypanosoma_brucei_TREU927 | product=hypothetical protein, conserved | location=Tb927_10_v5:3437405-3438844(-) | length=479	1	24	Tb927.10.14150	hypothetical protein, conserved	24	45.7	55.311	479	0.4276	36.265	-1.22567
>GeneDB|Tb11.01.3560 | organism=Trypanosoma_brucei_TREU927 | product=vacuolar ATP synthase subunit b, putative,v- ATPase B subunit,vacuolar proton pump B subunit | location=Tb927_11_01_v4:3071993-3073480(+) | length=495	1	34	Tb11.01.3560	vacuolar ATP synthase subunit b, putative,v- ATPase B subunit,vacuolar proton pump B subunit	34	85.1	55.619	495	0.42877	34.142	-1.22172
>GeneDB|Tb927.7.7070 | organism=Trypanosoma_brucei_TREU927 | product=hypothetical protein, conserved | location=Tb927_07_v4:2020614-2021945(-) | length=443	1	13	Tb927.7.7070	hypothetical protein, conserved	13	30.7	49.45	443	0.42919	47.99	-1.22031
>GeneDB|Tb09.244.2780 | organism=Trypanosoma_brucei_TREU927 | product=hypothetical protein, conserved | location=Tb927_09_v4:2299335-2301548(+) | length=737	1	19	Tb09.244.2780	hypothetical protein, conserved	19	34.1	82.306	737	0.42961	45.649	-1.2189
>GeneDB|Tb09.211.0050 | organism=Trypanosoma_brucei_TREU927 | product=ubiquitin-conjugating enzyme e2, putative,ubiquitin carrier protein, putative,ubiquitin-protein ligase, putative | location=Tb927_09_v4:1273327-1273779(-) | length=150	1	9	Tb09.211.0050	ubiquitin-conjugating enzyme e2, putative,ubiquitin carrier protein, putative,ubiquitin-protein ligase, putative	9	56	17.132	150	0.4305	22.142	-1.21591
>GeneDB|Tb11.03.0690 | organism=Trypanosoma_brucei_TREU927 | product=hypothetical protein, conserved | location=Tb927_11_01_v4:99922-102387(-) | length=821	1	2	Tb11.03.0690	hypothetical protein, conserved	2	2.1	90.205	821	0.43051	231.55	-1.21588
>GeneDB|Tb09.160.0650 | organism=Trypanosoma_brucei_TREU927 | product=hypothetical protein, conserved | location=Tb927_09_v4:388763-402202(-) | length=4479	1	25	Tb09.160.0650	hypothetical protein, conserved	25	9.1	502.8	4479	0.43065	48.679	-1.21541
>GeneDB|Tb927.10.4450 | organism=Trypanosoma_brucei_TREU927 | product=stress-inducible protein STI1-like, putative | location=Tb927_10_v5:1145242-1146015(-) | length=257	1	16	Tb927.10.4450	stress-inducible protein STI1-like, putative	16	70.4	28.425	257	0.43184	28.359	-1.21143
>GeneDB|Tb927.8.6390 | organism=Trypanosoma_brucei_TREU927 | product=lysophospholipase, putative,alpha/beta hydrolase, putative | location=Tb927_08_v4:1855921-1856763(+) | length=280	1	17	Tb927.8.6390	lysophospholipase, putative,alpha/beta hydrolase, putative	17	75.4	30.092	280	0.43273	31.32	-1.20846
>GeneDB|Tb927.10.14470 | organism=Trypanosoma_brucei_TREU927 | product=intraflagellar transport protein IFT140, putative | location=Tb927_10_v5:3530795-3535885(-) | length=1696	1	35	Tb927.10.14470	intraflagellar transport protein IFT140, putative	35	29.5	186.61	1696	0.43289	38.657	-1.20793
>GeneDB|Tb927.6.4020 | organism=Trypanosoma_brucei_TREU927 | product=hypothetical protein, conserved | location=Tb927_06_v4:1176571-1176891(-) | length=106	1	7	Tb927.6.4020	hypothetical protein, conserved	7	83	11.61	106	0.43469	19.122	-1.20194
>GeneDB|Tb11.01.8240 | organism=Trypanosoma_brucei_TREU927 | product=hypothetical protein, conserved | location=Tb927_11_01_v4:4322581-4322877(-) | length=98	1	4	Tb11.01.8240	hypothetical protein, conserved	4	44.9	10.913	98	0.43548	18.883	-1.19932
>GeneDB|Tb927.2.4870 | organism=Trypanosoma_brucei_TREU927 | product=kinetoplastid-specific dual specificity phosphatase, putative | location=Tb927_02_v4:862699-863607(-) | length=302	1	2	Tb927.2.4870	kinetoplastid-specific dual specificity phosphatase, putative	2	7.6	32.994	302	0.4376	21.054	-1.19232
>GeneDB|Tb927.8.7800 | organism=Trypanosoma_brucei_TREU927 | product=hypothetical protein, conserved | location=Tb927_08_v4:2268441-2272043(+) | length=1200	1	2	Tb927.8.7800	hypothetical protein, conserved	2	1.8	131.61	1200	0.43898	65.184	-1.18777
>GeneDB|Tb927.2.3720 | organism=Trypanosoma_brucei_TREU927 | product=ubiquitin-conjugating enzyme, putative | location=Tb927_02_v4:664928-665683(-) | length=251	1	2	Tb927.2.3720	ubiquitin-conjugating enzyme, putative	2	10.4	27.215	251	0.44092	2.3114	-1.18141
>GeneDB|Tb927.10.3260 | organism=Trypanosoma_brucei_TREU927 | product=Long-chain-fatty-acid--CoA ligase 5 (EC 6.2.1.3) (Long-chain acyl-CoA synthetase 5) (LACS 5), putative | location=Tb927_10_v5:841483-843594(+) | length=703;REV__>REV_GeneDB|Tb927.8.2060 Reverse sequence, was | organism=Trypanosoma_brucei_TREU927 | product=hypothetical protein, conserved | location=Tb927_08_v4:644458-653307(+) |…	6	39;1;0;0;0;0	Tb927.10.3260	Long-chain-fatty-acid--CoA ligase 5 (EC 6.2.1.3) (Long-chain acyl-CoA synthetase 5) (LACS 5), putative	39	52.8	78.983	703	0.44173	21.91	-1.17876
>GeneDB|Tb09.160.0580 | organism=Trypanosoma_brucei_TREU927 | product=Mov34/MPN/PAD-1 metallopeptidase, putative,metallo-peptidase, Clan MP, Family M67 | location=Tb927_09_v4:377286-378119(-) | length=277	1	4	Tb09.160.0580	Mov34/MPN/PAD-1 metallopeptidase, putative,metallo-peptidase, Clan MP, Family M67	4	16.2	31.173	277	0.44199	53.523	-1.17791
>GeneDB|Tb927.4.2170 | organism=Trypanosoma_brucei_TREU927 | product=hypothetical protein, conserved | location=Tb927_04_v4:559051-559446(+) | length=131	1	3	Tb927.4.2170	hypothetical protein, conserved	3	29	14.463	131	0.44254	24.113	-1.17612
>GeneDB|Tb927.3.2870 | organism=Trypanosoma_brucei_TREU927 | product=hypothetical protein, conserved | location=Tb927_03_v4:740585-742549(-) | length=654	1	1	Tb927.3.2870	hypothetical protein, conserved	1	2	72.901	654	0.44312	28.207	-1.17423
>GeneDB|Tb927.2.510 | organism=Trypanosoma_brucei_TREU927 | product=retrotransposon hot spot protein 4 (RHS4), putative | location=Tb927_02_v4:98073-100586(-) | length=837	1	3	Tb927.2.510	retrotransposon hot spot protein 4 (RHS4), putative	3	6.5	95.163	837	0.44333	27.675	-1.17355
>GeneDB|Tb927.8.2200 | organism=Trypanosoma_brucei_TREU927 | product=terbinafine resistance locus protein (yip1), putative | location=Tb927_08_v4:676674-677243(+) | length=189	1	2	Tb927.8.2200	terbinafine resistance locus protein (yip1), putative	2	13.8	20.718	189	0.4436	27.842	-1.17267
>GeneDB|Tb09.211.2330 | organism=Trypanosoma_brucei_TREU927 | product=small GTPase, putative,GTP-binding protein, putative | location=Tb927_09_v4:1681867-1682529(-) | length=220	1	11	Tb09.211.2330	small GTPase, putative,GTP-binding protein, putative	11	48.6	23.832	220	0.44488	21.979	-1.16851
>GeneDB|Tb927.3.3120 | organism=Trypanosoma_brucei_TREU927 | product=hypothetical protein, conserved | location=Tb927_03_v4:800847-802148(-) | length=433	1	3	Tb927.3.3120	hypothetical protein, conserved	3	7.6	47.636	433	0.4451	37.577	-1.1678
>GeneDB|Tb09.160.1200 | organism=Trypanosoma_brucei_TREU927 | product=microtubule- associated protein | location=Tb927_09_v4:525775-550419(-) | length=8214	1	22	Tb09.160.1200	microtubule- associated protein	22	64.6	928.38	8214	0.4474	34.314	-1.16036
>GeneDB|Tb927.3.4630 | organism=Trypanosoma_brucei_TREU927 | product=UDP-glucose:glycoprotein glucosyltransferase, putative | location=Tb927_03_v4:1308545-1313572(-) | length=1675;>REV_GeneDB|Tb927.3.4630 Reverse sequence, was | organism=Trypanosoma_brucei_TREU927 | product=UDP-glucose:glycoprotein glucosyltransferase, putative | location=Tb927_03_v4:1308545-1313572(-) | length=1675	2	25;1	Tb927.3.4630	UDP-glucose:glycoprotein glucosyltransferase, putative	25	22.7	186.84	1675	0.44744	62.603	-1.16023
>GeneDB|Tb927.10.13630 | organism=Trypanosoma_brucei_TREU927 | product=glucosidase, putative | location=Tb927_10_v5:3330420-3332843(-) | length=807	1	29	Tb927.10.13630	glucosidase, putative	29	50.4	91.488	807	0.44771	22.808	-1.15936
>GeneDB|Tb927.7.2330 | organism=Trypanosoma_brucei_TREU927 | product=hypothetical protein, conserved | location=Tb927_07_v4:599448-602747(-) | length=1099	1	3	Tb927.7.2330	hypothetical protein, conserved	3	11.8	123.84	1099	0.4487	46.252	-1.15618
>GeneDB|Tb927.5.4500 | organism=Trypanosoma_brucei_TREU927 | product=ras-like small GTPase, putative | location=Tb927_05_v4:1326421-1327005(-) | length=194	1	11	Tb927.5.4500	ras-like small GTPase, putative	11	73.7	21.771	194	0.44974	44.256	-1.15284
>GeneDB|Tb09.211.0680 | organism=Trypanosoma_brucei_TREU927 | product=CAAX prenyl protease 1, putative,metallo- peptidase, Clan M- Family M48 | location=Tb927_09_v4:1387152-1388435(-) | length=427	1	13	Tb09.211.0680	CAAX prenyl protease 1, putative,metallo- peptidase, Clan M- Family M48	13	29.5	48.904	427	0.45218	32.015	-1.14503
>GeneDB|Tb11.02.5620 | organism=Trypanosoma_brucei_TREU927 | product=dynein light chain, putative,dynein Tctex2 family, putative | location=Tb927_11_01_v4:2135146-2135493(-) | length=115	1	6	Tb11.02.5620	dynein light chain, putative,dynein Tctex2 family, putative	6	48.7	13.077	115	0.45224	22.302	-1.14484
>GeneDB|Tb09.211.0890 | organism=Trypanosoma_brucei_TREU927 | product=hypothetical protein, conserved | location=Tb927_09_v4:1421167-1421676(-) | length=169	1	4	Tb09.211.0890	hypothetical protein, conserved	4	33.1	19.876	169	0.45282	27.009	-1.14299
>GeneDB|Tb927.4.670 | organism=Trypanosoma_brucei_TREU927 | product=hypothetical protein, conserved | location=Tb927_04_v4:191716-193674(-) | length=652	1	2	Tb927.4.670	hypothetical protein, conserved	2	4.9	73.824	652	0.45441	37.252	-1.13793
>GeneDB|Tb11.52.0018 | organism=Trypanosoma_brucei_TREU927 | product=phospholipid-transporting ATPase, putative | location=Tb927_11_01_v4:3418079-3422788(-) | length=1569	1	2	Tb11.52.0018	phospholipid-transporting ATPase, putative	2	3.8	173.11	1569	0.45474	14.808	-1.13689
>GeneDB|Tb927.3.1200 | organism=Trypanosoma_brucei_TREU927 | product=hypothetical protein, conserved | location=Tb927_03_v4:295770-298091(+) | length=773	1	10	Tb927.3.1200	hypothetical protein, conserved	10	19.5	83.763	773	0.4558	24.478	-1.13353
>GeneDB|Tb927.10.16120 | organism=Trypanosoma_brucei_TREU927 | product=inosine-5'-monophosphate dehydrogenase,IMP dehydrogenase | location=Tb927_10_v5:3965348-3966691(+) | length=447	1	29	Tb927.10.16120	inosine-5'-monophosphate dehydrogenase,IMP dehydrogenase	29	75.6	48.481	447	0.45711	29.385	-1.12939
>GeneDB|Tb927.6.2200 | organism=Trypanosoma_brucei_TREU927 | product=hypothetical protein, conserved | location=Tb927_06_v4:698549-699142(+) | length=197	1	12	Tb927.6.2200	hypothetical protein, conserved	12	81.7	21.126	197	0.45976	38.875	-1.12105
>GeneDB|Tb927.5.2620 | organism=Trypanosoma_brucei_TREU927 | product=hypothetical protein, conserved | location=Tb927_05_v4:837628-838986(+) | length=452	1	4	Tb927.5.2620	hypothetical protein, conserved	4	14.2	48.704	452	0.45985	25.52	-1.12076
>GeneDB|Tb11.01.3590 | organism=Trypanosoma_brucei_TREU927 | product=FG-GAP repeat protein, putative,intergrin alpha chain protein, putative | location=Tb927_11_01_v4:3079197-3081065(+) | length=622	1	5	Tb11.01.3590	FG-GAP repeat protein, putative,intergrin alpha chain protein, putative	5	12.9	68.206	622	0.45986	37.629	-1.12073
>GeneDB|Tb927.1.5030 | organism=Trypanosoma_brucei_TREU927 | product=leucine-rich repeat protein (LRRP), putative | location=Tb927_01_v4:1007804-1010011(+) | length=735	1	6	Tb927.1.5030	leucine-rich repeat protein (LRRP), putative	6	11.6	80.773	735	0.46016	28.882	-1.11979
>GeneDB|Tb927.10.7930 | organism=Trypanosoma_brucei_TREU927 | product=2,3-bisphosphoglycerate-independent phosphoglycerate mutase | location=Tb927_10_v5:1981284-1982939(-) | length=551	1	33	Tb927.10.7930	2,3-bisphosphoglycerate-independent phosphoglycerate mutase	33	83.5	60.603	551	0.46065	27.517	-1.11826
>GeneDB|Tb09.211.3240 | organism=Trypanosoma_brucei_TREU927 | product=hypothetical protein, conserved,leucine-rich repeat protein (LRRP), putative | location=Tb927_09_v4:1851346-1852221(+) | length=291	1	9	Tb09.211.3240	hypothetical protein, conserved,leucine-rich repeat protein (LRRP), putative	9	49.5	32.359	291	0.46083	30.6	-1.11769
>GeneDB|Tb927.4.4690 | organism=Trypanosoma_brucei_TREU927 | product=hypothetical protein, conserved | location=Tb927_04_v4:1292420-1293256(-) | length=278	1	15	Tb927.4.4690	hypothetical protein, conserved	15	58.3	31.337	278	0.4609	56.01	-1.11747
>GeneDB|Tb927.6.2930 | organism=Trypanosoma_brucei_TREU927 | product=hypothetical protein, conserved | location=Tb927_06_v4:877717-879306(+) | length=529	1	2	Tb927.6.2930	hypothetical protein, conserved	2	7.4	59.606	529	0.461	20.395	-1.11716
>GeneDB|Tb11.01.5120 | organism=Trypanosoma_brucei_TREU927 | product=hypothetical protein, conserved | location=Tb927_11_01_v4:3555933-3558782(-) | length=949	1	21	Tb11.01.5120	hypothetical protein, conserved	21	31.1	105.38	949	0.46143	23.6	-1.11582
>GeneDB|Tb927.3.3830 | organism=Trypanosoma_brucei_TREU927 | product=hypothetical protein, conserved | location=Tb927_03_v4:1063644-1064780(+) | length=378	1	11	Tb927.3.3830	hypothetical protein, conserved	11	36.2	42.628	378	0.46163	29.752	-1.11519
>GeneDB|Tb927.2.4090 | organism=Trypanosoma_brucei_TREU927 | product=hypothetical protein, conserved | location=Tb927_02_v4:718655-719467(-) | length=270	1	6	Tb927.2.4090	hypothetical protein, conserved	6	31.9	29.38	270	0.46177	31.839	-1.11475
>GeneDB|Tb09.160.0780 | organism=Trypanosoma_brucei_TREU927 | product=syntaxin binding protein 1, putative | location=Tb927_09_v4:435984-437912(-) | length=641	1	7	Tb09.160.0780	syntaxin binding protein 1, putative	7	14.8	71.657	641	0.46188	32.101	-1.11441
>GeneDB|Tb11.01.3320 | organism=Trypanosoma_brucei_TREU927 | product=Trichohyalin, putative | location=Tb927_11_01_v4:3017839-3019815(+) | length=658;REV__>GeneDB|Tb927.5.390 | organism=Trypanosoma_brucei_TREU927 | product=75 kDa invariant surface glycoprotein, putative | location=Tb927_05_v4:121424-122992(+) | length=522	2	18;1	Tb11.01.3320	Trichohyalin, putative	18	35.9	78.966	658	0.46289	23.927	-1.11126
>GeneDB|Tb11.01.1290 | organism=Trypanosoma_brucei_TREU927 | product=14-3-3-I protein | location=Tb927_11_01_v4:2547448-2548236(-) | length=262	1	21	Tb11.01.1290	14-3-3-I protein	21	65.3	30.31	262	0.46321	28.543	-1.11026
>GeneDB|Tb927.7.2950 | organism=Trypanosoma_brucei_TREU927 | product=hypothetical protein, conserved | location=Tb927_07_v4:740636-742648(+) | length=670	1	6	Tb927.7.2950	hypothetical protein, conserved	6	12.7	74.103	670	0.46654	37.864	-1.09993
>GeneDB|Tb09.160.4630 | organism=Trypanosoma_brucei_TREU927 | product=hypothetical protein, conserved | location=Tb927_09_v4:992357-993796(+) | length=479;>GeneDB|Tb09.v2.0030 | organism=Trypanosoma_brucei_TREU927 | product=hypothetical protein, conserved | location=Tb927_09_v4:996370-997809(+) | length=479;>GeneDB|Tb09.v2.0020 | organism=Trypanosoma_brucei_TREU927 | product=hypothetical protein,…	3	8;8;7	Tb09.160.4630	hypothetical protein, conserved	8	21.1	52.586	479	0.46698	60.873	-1.09857
>GeneDB|Tb11.02.0930 | organism=Trypanosoma_brucei_TREU927 | product=hypothetical protein, conserved | location=Tb927_11_01_v4:996239-997831(+) | length=530	1	2	Tb11.02.0930	hypothetical protein, conserved	2	10	58.165	530	0.46784	11.978	-1.09591
>GeneDB|Tb09.211.4910 | organism=Trypanosoma_brucei_TREU927 | product=ubiquitin carboxyl-terminal hydrolase, putative,cysteine peptidase, Clan CA, family C19, putative | location=Tb927_09_v4:2204687-2208172(-) | length=1161	1	10	Tb09.211.4910	ubiquitin carboxyl-terminal hydrolase, putative,cysteine peptidase, Clan CA, family C19, putative	10	11.4	132.38	1161	0.46803	29.071	-1.09533
>GeneDB|Tb927.10.11360 | organism=Trypanosoma_brucei_TREU927 | product=protein phosphatase 2A regulatory subunit, putative | location=Tb927_10_v5:2772920-2774617(+) | length=565	1	2	Tb927.10.11360	protein phosphatase 2A regulatory subunit, putative	2	4.6	61.791	565	0.46849	41.618	-1.09391
>GeneDB|Tb927.10.11590 | organism=Trypanosoma_brucei_TREU927 | product=nicotinate phosphoribosyltransferase, putative | location=Tb927_10_v5:2827191-2828477(+) | length=428	1	5	Tb927.10.11590	nicotinate phosphoribosyltransferase, putative	5	14.3	48.917	428	0.46864	23.334	-1.09345
>GeneDB|Tb927.10.3670 | organism=Trypanosoma_brucei_TREU927 | product=hypothetical protein, conserved | location=Tb927_10_v5:954962-956428(-) | length=488	1	2	Tb927.10.3670	hypothetical protein, conserved	2	5.1	52.231	488	0.46906	50.585	-1.09216
>GeneDB|Tb11.47.0005 | organism=Trypanosoma_brucei_TREU927 | product=hypothetical protein, conserved | location=Tb927_11_01_v4:417832-418485(+) | length=217	1	1	Tb11.47.0005	hypothetical protein, conserved	1	9.2	24.836	217	0.47003	13.383	-1.08918
>GeneDB|Tb927.4.380 | organism=Trypanosoma_brucei_TREU927 | product=hypothetical protein, conserved | location=Tb927_04_v4:112902-113903(-) | length=333	1	5	Tb927.4.380	hypothetical protein, conserved	5	21	35.613	333	0.47033	23.32	-1.08825
>GeneDB|Tb927.2.4510 | organism=Trypanosoma_brucei_TREU927 | product=cdc2-related kinase, putative,protein kinase, putative | location=Tb927_02_v4:798252-800576(-) | length=774	1	2	Tb927.2.4510	cdc2-related kinase, putative,protein kinase, putative	2	3.7	85.591	774	0.47066	123.33	-1.08724
>GeneDB|Tb09.211.3920 | organism=Trypanosoma_brucei_TREU927 | product=QA-SNARE protein putative | location=Tb927_09_v4:2007904-2008821(+) | length=305	1	8	Tb09.211.3920	QA-SNARE protein putative	8	31.5	35.982	305	0.47143	27.078	-1.08488
>GeneDB|Tb927.10.15870 | organism=Trypanosoma_brucei_TREU927 | product=RNA binding protein, putative | location=Tb927_10_v5:3914983-3915708(+) | length=241	1	1	Tb927.10.15870	RNA binding protein, putative	1	8.3	26.919	241	0.47177	39.809	-1.08384
>GeneDB|Tb927.6.4500 | organism=Trypanosoma_brucei_TREU927 | product=hypothetical protein, conserved | location=Tb927_06_v4:1263156-1263767(-) | length=203	1	7	Tb927.6.4500	hypothetical protein, conserved	7	39.9	22.705	203	0.47193	80.991	-1.08336
>GeneDB|Tb927.7.2190 | organism=Trypanosoma_brucei_TREU927 | product=hypothetical protein, conserved | location=Tb927_07_v4:567973-568773(-) | length=266	1	10	Tb927.7.2190	hypothetical protein, conserved	10	30.5	29.242	266	0.47236	46.882	-1.08204
>GeneDB|Tb11.02.1910 | organism=Trypanosoma_brucei_TREU927 | product=hypothetical protein, conserved | location=Tb927_11_01_v4:1240665-1241618(-) | length=317	1	8	Tb11.02.1910	hypothetical protein, conserved	8	32.5	36.747	317	0.47333	26.648	-1.07908
>GeneDB|Tb927.8.3100 | organism=Trypanosoma_brucei_TREU927 | product=coronin, putative | location=Tb927_08_v4:929015-930586(+) | length=523	1	15	Tb927.8.3100	coronin, putative	15	39.4	57.312	523	0.47384	21.883	-1.07753
>GeneDB|Tb927.6.1920 | organism=Trypanosoma_brucei_TREU927 | product=hypothetical protein, conserved | location=Tb927_06_v4:635225-636397(-) | length=390	1	8	Tb927.6.1920	hypothetical protein, conserved	8	29.7	42.421	390	0.4756	10.234	-1.07218
>GeneDB|Tb927.4.2530 | organism=Trypanosoma_brucei_TREU927 | product=hypothetical protein, conserved | location=Tb927_04_v4:667858-668334(+) | length=158	1	3	Tb927.4.2530	hypothetical protein, conserved	3	24.1	16.835	158	0.4759	53.316	-1.07127
>GeneDB|Tb11.01.1680 | organism=Trypanosoma_brucei_TREU927 | product=polyubiquitin, putative | location=Tb927_11_01_v4:2621515-2623572(+) | length=685;REV__>GeneDB|Tb09.211.1350 | organism=Trypanosoma_brucei_TREU927 | product=peptidyl-prolyl cis-trans isomerase (cyclophilin- 40), putative,cyclophilin-40, putative | location=Tb927_09_v4:1504694-1505758(-) | length=354	2	7;1	Tb11.01.1680	polyubiquitin, putative	7	77.5	76.602	685	0.47713	50.199	-1.06755
>GeneDB|Tb927.7.1240 | organism=Trypanosoma_brucei_TREU927 | product=sphingosine kinase A, B, putative | location=Tb927_07_v4:321624-323933(+) | length=769	1	8	Tb927.7.1240	sphingosine kinase A, B, putative	8	12.9	83.577	769	0.47727	18.84	-1.06712
>GeneDB|Tb927.1.3200 | organism=Trypanosoma_brucei_TREU927 | product=phosphatase-like protein, putative | location=Tb927_01_v4:690155-690820(+) | length=221	1	10	Tb927.1.3200	phosphatase-like protein, putative	10	74.2	24.493	221	0.47733	36.428	-1.06694
>GeneDB|Tb927.10.11300 | organism=Trypanosoma_brucei_TREU927 | product=paraflagellar rod component, putative | location=Tb927_10_v5:2760514-2760894(+) | length=126	1	14	Tb927.10.11300	paraflagellar rod component, putative	14	92.9	14.328	126	0.47753	20.066	-1.06634
>GeneDB|Tb11.01.0410 | organism=Trypanosoma_brucei_TREU927 | product=ER lumen retaining receptor protein, putative | location=Tb927_11_01_v4:2218645-2219304(+) | length=219	1	1	Tb11.01.0410	ER lumen retaining receptor protein, putative	1	5	25.955	219	0.47774	13.826	-1.0657
>GeneDB|Tb927.10.10320 | organism=Trypanosoma_brucei_TREU927 | product=dynein light chain, putative,dynein Tctex1 family, putative | location=Tb927_10_v5:2537407-2537736(-) | length=109	1	4	Tb927.10.10320	dynein light chain, putative,dynein Tctex1 family, putative	4	56	12.161	109	0.47819	24.56	-1.06434
>GeneDB|Tb927.6.3610 | organism=Trypanosoma_brucei_TREU927 | product=hypothetical protein, conserved | location=Tb927_06_v4:1077021-1078058(-) | length=345	1	3	Tb927.6.3610	hypothetical protein, conserved	3	12.5	38.967	345	0.47847	7.4768	-1.0635
>GeneDB|Tb927.3.2070 | organism=Trypanosoma_brucei_TREU927 | product=hypothetical protein, conserved | location=Tb927_03_v4:543223-547281(-) | length=1352	1	4	Tb927.3.2070	hypothetical protein, conserved	4	6.1	150.7	1352	0.48469	41.765	-1.04487
>GeneDB|Tb927.2.4590 | organism=Trypanosoma_brucei_TREU927 | product=branched-chain amino acid aminotransferase, putative | location=Tb927_02_v4:818396-819499(-) | length=367;>GeneDB|Tb927.2.4610 | organism=Trypanosoma_brucei_TREU927 | product=branched-chain amino acid aminotransferase, putative | location=Tb927_02_v4:820235-821338(-) | length=367	2	21;19	Tb927.2.4590	branched-chain amino acid aminotransferase, putative	21	63.2	40.432	367	0.48643	24.938	-1.0397
>GeneDB|Tb11.01.6860 | organism=Trypanosoma_brucei_TREU927 | product=hypothetical protein, conserved | location=Tb927_11_01_v4:3980983-3981939(-) | length=318	1	3	Tb11.01.6860	hypothetical protein, conserved	3	11.9	35.527	318	0.48655	37.465	-1.03934
>GeneDB|Tb927.8.2100 | organism=Trypanosoma_brucei_TREU927 | product=vacuolar ATP synthase 16 kDa proteolipid subunit, putative | location=Tb927_08_v4:658652-659149(+) | length=165	1	2	Tb927.8.2100	vacuolar ATP synthase 16 kDa proteolipid subunit, putative	2	14.5	16.868	165	0.48684	12.208	-1.03848
>GeneDB|Tb927.10.5140 | organism=Trypanosoma_brucei_TREU927 | product=protein kinase, putative,mitogen-activated protein kinase 2, putative | location=Tb927_10_v5:1261399-1262727(+) | length=442	1	16	Tb927.10.5140	protein kinase, putative,mitogen-activated protein kinase 2, putative	16	46.2	49.74	442	0.48757	40.087	-1.03632
>GeneDB|Tb09.160.1110 | organism=Trypanosoma_brucei_TREU927 | product=hypothetical protein, conserved | location=Tb927_09_v4:512324-512908(-) | length=194	1	2	Tb09.160.1110	hypothetical protein, conserved	2	10.3	21.661	194	0.48824	255.2	-1.03434
>GeneDB|Tb11.12.0013 | organism=Trypanosoma_brucei_TREU927 | product=target SNARE, putative | location=Tb927_11_01_v4:2362678-2363634(+) | length=318	1	1	Tb11.12.0013	target SNARE, putative	1	4.1	35.541	318	0.48984	23.57	-1.02962
>GeneDB|Tb927.6.400 | organism=Trypanosoma_brucei_TREU927 | product=peptidase M20/M25/M40, putative | location=Tb927_06_v4:190663-192090(+) | length=475	1	16	Tb927.6.400	peptidase M20/M25/M40, putative	16	50.1	52.185	475	0.49029	21.322	-1.02829
>GeneDB|Tb927.6.1570 | organism=Trypanosoma_brucei_TREU927 | product=2-hydroxy-3-oxopropionate reductase, putative | location=Tb927_06_v4:543556-544458(-) | length=300	1	14	Tb927.6.1570	2-hydroxy-3-oxopropionate reductase, putative	14	67.3	31.753	300	0.49047	22.993	-1.02776
>GeneDB|Tb927.8.6450 | organism=Trypanosoma_brucei_TREU927 | product=inhibitor of cysteine peptidase | location=Tb927_08_v4:1866734-1867099(+) | length=121	1	2	Tb927.8.6450	inhibitor of cysteine peptidase	2	26.4	13.454	121	0.49066	23.076	-1.0272
>GeneDB|Tb927.10.1520 | organism=Trypanosoma_brucei_TREU927 | product=small GTPase, putative,Ras-related protein, putative | location=Tb927_10_v5:415021-415830(-) | length=269	1	5	Tb927.10.1520	small GTPase, putative,Ras-related protein, putative	5	20.4	28.639	269	0.4921	92.613	-1.02298
>GeneDB|Tb927.3.4420 | organism=Trypanosoma_brucei_TREU927 | product=hypothetical protein, conserved | location=Tb927_03_v4:1241845-1243176(-) | length=443	1	4	Tb927.3.4420	hypothetical protein, conserved	4	11.3	49.984	443	0.49272	25.073	-1.02116
>GeneDB|Tb927.10.12360 | organism=Trypanosoma_brucei_TREU927 | product=hypothetical protein, conserved | location=Tb927_10_v5:2998832-2999344(-) | length=170	1	4	Tb927.10.12360	hypothetical protein, conserved	4	39.4	18.601	170	0.49292	20.249	-1.02057
>GeneDB|Tb927.10.12590 | organism=Trypanosoma_brucei_TREU927 | product=hypothetical protein, conserved | location=Tb927_10_v5:3051347-3054148(-) | length=933	1	25	Tb927.10.12590	hypothetical protein, conserved	25	48.8	105.85	933	0.49298	33.127	-1.0204
>GeneDB|Tb927.2.4530 | organism=Trypanosoma_brucei_TREU927 | product=hypothetical protein, conserved | location=Tb927_02_v4:806136-806849(-) | length=237	1	7	Tb927.2.4530	hypothetical protein, conserved	7	45.1	25.526	237	0.49382	24.379	-1.01794
>GeneDB|Tb927.10.14800 | organism=Trypanosoma_brucei_TREU927 | product=protein kinase, putative,mitogen-activated protein kinase 9, putative | location=Tb927_10_v5:3609426-3610589(-) | length=387	1	6	Tb927.10.14800	protein kinase, putative,mitogen-activated protein kinase 9, putative	6	22.2	42.749	387	0.494	31.692	-1.01742
>GeneDB|Tb11.01.4810 | organism=Trypanosoma_brucei_TREU927 | product=hypothetical protein, conserved | location=Tb927_11_01_v4:3489943-3490593(-) | length=216	1	15	Tb11.01.4810	hypothetical protein, conserved	15	68.5	23.909	216	0.4943	27.079	-1.01654
>GeneDB|Tb09.211.4470 | organism=Trypanosoma_brucei_TREU927 | product=ADP-ribosylation factor, putative | location=Tb927_09_v4:2121284-2121832(-) | length=182;>GeneDB|Tb09.211.4480 | organism=Trypanosoma_brucei_TREU927 | product=ADP-ribosylation factor, putative | location=Tb927_09_v4:2122048-2122596(-) | length=182;>GeneDB|Tb09.211.4490 | organism=Trypanosoma_brucei_TREU927 | product=ADP-ribosyl…	4	11;11;11;10	Tb09.211.4470	ADP-ribosylation factor, putative	11	79.1	20.624	182	0.4945	26.258	-1.01596
>GeneDB|Tb927.8.4330 | organism=Trypanosoma_brucei_TREU927 | product=small GTP-binding protein Rab11 | location=Tb927_08_v4:1286927-1287577(-) | length=216	1	11	Tb927.8.4330	small GTP-binding protein Rab11	11	65.7	23.527	216	0.49456	23.677	-1.01578
>GeneDB|Tb927.4.2070 | organism=Trypanosoma_brucei_TREU927 | product=antigenic protein, putative | location=Tb927_04_v4:518726-532093(-) | length=4455	1	16	Tb927.4.2070	antigenic protein, putative	16	52.3	511.32	4455	0.49567	39.407	-1.01255
>GeneDB|Tb927.8.1210 | organism=Trypanosoma_brucei_TREU927 | product=hypothetical protein, conserved | location=Tb927_08_v4:385963-388023(-) | length=686	1	7	Tb927.8.1210	hypothetical protein, conserved	7	47.7	77.786	686	0.49594	24.228	-1.01176
>GeneDB|Tb927.10.12710 | organism=Trypanosoma_brucei_TREU927 | product=heat shock protein, putative | location=Tb927_10_v5:3085599-3088034(-) | length=811;>REV_GeneDB|Tb11.01.6570 Reverse sequence, was | organism=Trypanosoma_brucei_TREU927 | product=hypothetical protein, conserved | location=Tb927_11_01_v4:3913175-3915151(-) | length=658;REV__>GeneDB|Tb927.10.11860 | organism=Trypanosoma_brucei_T…	3	64;1;1	Tb927.10.12710	heat shock protein, putative	64	80.1	90.863	811	0.49598	36.057	-1.01165
>GeneDB|Tb927.10.1970 | organism=Trypanosoma_brucei_TREU927 | product=hypothetical protein, conserved | location=Tb927_10_v5:513794-518011(+) | length=1405;>REV_GeneDB|Tb927.8.1360 Reverse sequence, was | organism=Trypanosoma_brucei_TREU927 | product=hypothetical protein, conserved | location=Tb927_08_v4:432175-444849(-) | length=4224	2	12;1	Tb927.10.1970	hypothetical protein, conserved	12	11	156.62	1405	0.49651	34.37	-1.01011
>GeneDB|Tb927.6.1650 | organism=Trypanosoma_brucei_TREU927 | product=single strand-specific nuclease, putative | location=Tb927_06_v4:559096-560046(-) | length=316;>GeneDB|Tb927.6.1640 | organism=Trypanosoma_brucei_TREU927 | product=single strand-specific nuclease, putative | location=Tb927_06_v4:556680-557570(-) | length=296	2	4;3	Tb927.6.1650	single strand-specific nuclease, putative	4	21.8	35.682	316	0.49657	75.795	-1.00993
>GeneDB|Tb927.8.3870 | organism=Trypanosoma_brucei_TREU927 | product=hypothetical protein, conserved | location=Tb927_08_v4:1153439-1157056(-) | length=1205	1	10	Tb927.8.3870	hypothetical protein, conserved	10	10	127.73	1205	0.49685	31.218	-1.00912
>GeneDB|Tb927.10.14490 | organism=Trypanosoma_brucei_TREU927 | product=hypothetical protein, conserved | location=Tb927_10_v5:3542653-3543915(-) | length=420	1	24	Tb927.10.14490	hypothetical protein, conserved	24	59.3	46.24	420	0.49698	27.184	-1.00874
>GeneDB|Tb11.01.3040 | organism=Trypanosoma_brucei_TREU927 | product=cytosolic malate dehydrogenase | location=Tb927_11_01_v4:2954034-2955020(+) | length=328	1	20	Tb11.01.3040	cytosolic malate dehydrogenase	20	60.4	35.151	328	0.49762	25.926	-1.00688
>GeneDB|Tb927.8.2910 | organism=Trypanosoma_brucei_TREU927 | product=mannosyl-oligosaccharide 1,2-alpha-mannosidase IB, putative | location=Tb927_08_v4:882717-884483(+) | length=588;>GeneDB|Tb927.8.2920 | organism=Trypanosoma_brucei_TREU927 | product=mannosyl-oligosaccharide 1,2-alpha-mannosidase IB, putative | location=Tb927_08_v4:884710-886503(+) | length=597;>GeneDB|Tb927.8.2930 | organism=Try…	5	4;2;2;2;1	Tb927.8.2910	mannosyl-oligosaccharide 1,2-alpha-mannosidase IB, putative	4	11.4	65.812	588	0.49996	26.684	-1.00012
>GeneDB|Tb927.10.2300 | organism=Trypanosoma_brucei_TREU927 | product=hypothetical protein, conserved | location=Tb927_10_v5:597023-597601(+) | length=192	1	1	Tb927.10.2300	hypothetical protein, conserved	1	7.8	21.425	192	0.50191	3.6149	-0.994499
>GeneDB|Tb11.02.1135 | organism=Trypanosoma_brucei_TREU927 | product=dynein light chain, putative,dynein Tctex1 family, putative | location=Tb927_11_01_v4:1060376-1060726(+) | length=116	1	4	Tb11.02.1135	dynein light chain, putative,dynein Tctex1 family, putative	4	52.6	13.273	116	0.50195	36.816	-0.994384
>GeneDB|Tb11.02.2040 | organism=Trypanosoma_brucei_TREU927 | product=hypothetical protein, conserved | location=Tb927_11_01_v4:1268639-1269016(+) | length=125	1	10	Tb11.02.2040	hypothetical protein, conserved	10	63.2	14.038	125	0.50197	20.233	-0.994327
>GeneDB|Tb09.160.2810 | organism=Trypanosoma_brucei_TREU927 | product=fatty acyl CoA synthetase 3 | location=Tb927_09_v4:746960-749068(+) | length=702	1	5	Tb09.160.2810	fatty acyl CoA synthetase 3	5	11.1	77.853	702	0.50223	19.126	-0.99358
>GeneDB|Tb927.10.10360 | organism=Trypanosoma_brucei_TREU927 | product=microtubule-associated protein, putative | location=Tb927_10_v5:2548906-2558502(-) | length=3198	1	6	Tb927.10.10360	microtubule-associated protein, putative	6	80.4	373.53	3198	0.50381	46.714	-0.989048
>GeneDB|Tb11.02.5720 | organism=Trypanosoma_brucei_TREU927 | product=ribonucleoside-diphosphate reductase large chain | location=Tb927_11_01_v4:2162269-2164785(-) | length=838	1	29	Tb11.02.5720	ribonucleoside-diphosphate reductase large chain	29	40	94.657	838	0.50523	21.996	-0.984988
>GeneDB|Tb927.7.6360 | organism=Trypanosoma_brucei_TREU927 | product=histone H2A variant | location=Tb927_07_v4:1729178-1729717(-) | length=179	1	8	Tb927.7.6360	histone H2A variant	8	48.6	18.667	179	0.50723	17.939	-0.979288
>GeneDB|Tb11.01.2730 | organism=Trypanosoma_brucei_TREU927 | product=hypothetical protein, conserved | location=Tb927_11_01_v4:2867559-2876030(+) | length=2823	1	3	Tb11.01.2730	hypothetical protein, conserved	3	16.8	311.87	2823	0.50883	43.354	-0.974744
>GeneDB|Tb927.6.3720 | organism=Trypanosoma_brucei_TREU927 | product=hypothetical protein, conserved | location=Tb927_06_v4:1109279-1111291(-) | length=670	1	3	Tb927.6.3720	hypothetical protein, conserved	3	6.9	75.008	670	0.50889	23.533	-0.974574
>GeneDB|Tb927.5.3710 | organism=Trypanosoma_brucei_TREU927 | product=essential neutral sphingomyelinase | location=Tb927_05_v4:1160483-1162225(+) | length=580	1	5	Tb927.5.3710	essential neutral sphingomyelinase	5	10.5	65.019	580	0.50921	23.691	-0.973667
>GeneDB|Tb927.10.790 | organism=Trypanosoma_brucei_TREU927 | product=vesicle-associated membrane protein, putative,synaptobrevin, putative | location=Tb927_10_v5:203928-204647(+) | length=239	1	6	Tb927.10.790	vesicle-associated membrane protein, putative,synaptobrevin, putative	6	36.4	26.489	239	0.51005	25.195	-0.971289
>GeneDB|Tb927.6.3670 | organism=Trypanosoma_brucei_TREU927 | product=paraflagellar rod component, putative | location=Tb927_06_v4:1090477-1100145(-) | length=3222	1	5	Tb927.6.3670	paraflagellar rod component, putative	5	2.6	359.21	3222	0.51087	25.837	-0.968972
>GeneDB|Tb927.10.2880 | organism=Trypanosoma_brucei_TREU927 | product=calcium channel protein, putative | location=Tb927_10_v5:737081-745162(+) | length=2693	1	30	Tb927.10.2880	calcium channel protein, putative	30	15.4	303.77	2693	0.5109	41.463	-0.968887
>GeneDB|Tb11.50.0001 | organism=Trypanosoma_brucei_TREU927 | product=hypothetical protein, conserved | location=Tb927_11_01_v4:174207-175001(-) | length=264	1	15	Tb11.50.0001	hypothetical protein, conserved	15	55.7	30.18	264	0.51182	19.386	-0.966292
>GeneDB|Tb09.211.1470 | organism=Trypanosoma_brucei_TREU927 | product=PACRGB,flagellar component | location=Tb927_09_v4:1521811-1522749(-) | length=312	1	15	Tb09.211.1470	PACRGB,flagellar component	15	56.7	35.353	312	0.51202	23.471	-0.965728
>GeneDB|Tb09.160.1440 | organism=Trypanosoma_brucei_TREU927 | product=hypothetical protein, conserved | location=Tb927_09_v4:593222-594832(-) | length=536	1	7	Tb09.160.1440	hypothetical protein, conserved	7	17.5	56.997	536	0.51206	100.29	-0.965615
>GeneDB|Tb927.3.3490 | organism=Trypanosoma_brucei_TREU927 | product=high mobility group protein, putative | location=Tb927_03_v4:985621-986436(+) | length=271	1	23	Tb927.3.3490	high mobility group protein, putative	23	65.3	30.866	271	0.5124	21.391	-0.964658
>GeneDB|Tb927.10.13960 | organism=Trypanosoma_brucei_TREU927 | product=flagellar protein PF20 | location=Tb927_10_v5:3401459-3403228(-) | length=589	1	11	Tb927.10.13960	flagellar protein PF20	11	21.7	65.568	589	0.51242	23.832	-0.964601
>GeneDB|Tb927.1.3260 | organism=Trypanosoma_brucei_TREU927 | product=hypothetical protein, conserved | location=Tb927_01_v4:703126-708786(+) | length=1886	1	10	Tb927.1.3260	hypothetical protein, conserved	10	9.3	203.06	1886	0.51247	37.605	-0.964461
>GeneDB|Tb11.01.5350 | organism=Trypanosoma_brucei_TREU927 | product=profilin | location=Tb927_11_01_v4:3613516-3613968(+) | length=150	1	7	Tb11.01.5350	profilin	7	51.3	16.122	150	0.5152	23.22	-0.956796
>GeneDB|Tb927.8.3410 | organism=Trypanosoma_brucei_TREU927 | product=hypothetical protein, conserved | location=Tb927_08_v4:1016368-1020924(+) | length=1518	1	4	Tb927.8.3410	hypothetical protein, conserved	4	4.5	170.41	1518	0.51542	31.887	-0.95618
>GeneDB|Tb927.4.360 | organism=Trypanosoma_brucei_TREU927 | product=1,2-Dihydroxy-3-keto-5-methylthiopentene dioxygenase, putative;with=GeneDB:LmjF34.4600 | location=Tb927_04_v4:109262-110104(-) | length=280	1	11	Tb927.4.360	1,2-Dihydroxy-3-keto-5-methylthiopentene dioxygenase, putative;with=GeneDB:LmjF34.4600	11	54.3	33.47	280	0.51659	25.47	-0.952908
>GeneDB|Tb927.10.8960 | organism=Trypanosoma_brucei_TREU927 | product=hypothetical protein, conserved | location=Tb927_10_v5:2224863-2225576(+) | length=237	1	3	Tb927.10.8960	hypothetical protein, conserved	3	14.8	26.87	237	0.51678	96.001	-0.952378
>GeneDB|Tb927.8.1290 | organism=Trypanosoma_brucei_TREU927 | product=hypothetical protein, conserved | location=Tb927_08_v4:415829-419149(-) | length=1106	1	4	Tb927.8.1290	hypothetical protein, conserved	4	5.5	120.05	1106	0.51689	34.589	-0.952071
>GeneDB|Tb927.8.1540 | organism=Trypanosoma_brucei_TREU927 | product=hypothetical protein, conserved | location=Tb927_08_v4:499315-501987(+) | length=890	1	15	Tb927.8.1540	hypothetical protein, conserved	15	23.3	97.778	890	0.51719	30.096	-0.951234
>GeneDB|Tb11.03.0330 | organism=Trypanosoma_brucei_TREU927 | product=hypothetical protein, conserved | location=Tb927_11_01_v4:205097-207487(+) | length=796	1	12	Tb11.03.0330	hypothetical protein, conserved	12	20.6	86.65	796	0.51739	29.706	-0.950676
>GeneDB|Tb11.01.0840 | organism=Trypanosoma_brucei_TREU927 | product=hypothetical protein, conserved | location=Tb927_11_01_v4:2438891-2439751(+) | length=286	1	6	Tb11.01.0840	hypothetical protein, conserved	6	33.6	33.383	286	0.51803	19.129	-0.948892
>GeneDB|Tb09.211.2740 | organism=Trypanosoma_brucei_TREU927 | product=Gim5B protein,glycosomal membrane protein | location=Tb927_09_v4:1757094-1757819(+) | length=241	1	10	Tb09.211.2740	Gim5B protein,glycosomal membrane protein	10	30.3	25.975	241	0.51807	28.936	-0.948781
>GeneDB|Tb11.02.5420 | organism=Trypanosoma_brucei_TREU927 | product=NADPH--cytochrome p450 reductase, putative | location=Tb927_11_01_v4:2086659-2088554(-) | length=631	1	9	Tb11.02.5420	NADPH--cytochrome p450 reductase, putative	9	19.5	69.987	631	0.5189	62.529	-0.946472
>GeneDB|Tb927.5.2940 | organism=Trypanosoma_brucei_TREU927 | product=stress-induced protein sti1, putative | location=Tb927_05_v4:927151-928803(+) | length=550;>REV_GeneDB|Tb927.5.220 Reverse sequence, was | organism=Trypanosoma_brucei_TREU927 | product=variant surface glycoprotein (VSG, pseudogene), putative,variant surface glycoprotein, degenerate | location=Tb927_05_v4:46534-48165(+) | length=…	3	53;1;1	Tb927.5.2940	stress-induced protein sti1, putative	53	87.8	62.327	550	0.52075	31.088	-0.941337
>GeneDB|Tb11.02.4700 | organism=Trypanosoma_brucei_TREU927 | product=14-3-3 protein | location=Tb927_11_01_v4:1911573-1912331(-) | length=252	1	26	Tb11.02.4700	14-3-3 protein	26	82.9	29.196	252	0.52222	53.137	-0.93727
>GeneDB|Tb927.4.1510 | organism=Trypanosoma_brucei_TREU927 | product=phospholipid-translocating ATPase, putative | location=Tb927_04_v4:388967-392209(-) | length=1080	1	5	Tb927.4.1510	phospholipid-translocating ATPase, putative	5	7.4	121.53	1080	0.52234	23.455	-0.936939
>GeneDB|Tb927.10.8180 | organism=Trypanosoma_brucei_TREU927 | product=hypothetical protein, conserved | location=Tb927_10_v5:2031928-2035539(-) | length=1203	1	3	Tb927.10.8180	hypothetical protein, conserved	3	4.8	128.52	1203	0.5238	122.06	-0.932912
>GeneDB|Tb927.5.690 | organism=Trypanosoma_brucei_TREU927 | product=hypothetical protein, conserved | location=Tb927_05_v4:243207-243662(+) | length=151	1	2	Tb927.5.690	hypothetical protein, conserved	2	27.2	16.361	151	0.52488	3.732	-0.92994
>GeneDB|Tb09.211.1830 | organism=Trypanosoma_brucei_TREU927 | product=hypothetical protein, conserved | location=Tb927_09_v4:1588202-1592080(-) | length=1292	1	2	Tb09.211.1830	hypothetical protein, conserved	2	2.8	146.39	1292	0.52519	23.302	-0.929089
>GeneDB|Tb11.01.6380 | organism=Trypanosoma_brucei_TREU927 | product=hypothetical protein, conserved | location=Tb927_11_01_v4:3863303-3864421(-) | length=372	1	4	Tb11.01.6380	hypothetical protein, conserved	4	11	42.2	372	0.52537	22.016	-0.928594
>GeneDB|Tb927.8.4280 | organism=Trypanosoma_brucei_TREU927 | product=nuclear transport factor 2, putative | location=Tb927_08_v4:1272851-1273225(-) | length=124	1	4	Tb927.8.4280	nuclear transport factor 2, putative	4	48.4	13.907	124	0.52577	22.41	-0.927496
>GeneDB|Tb927.8.1090 | organism=Trypanosoma_brucei_TREU927 | product=NPAPL | location=Tb927_08_v4:347926-350166(-) | length=746	1	3	Tb927.8.1090	NPAPL	3	3.9	81.678	746	0.52614	67.728	-0.926481
>GeneDB|Tb11.03.0880 | organism=Trypanosoma_brucei_TREU927 | product=hypothetical protein, conserved,predicted WD40 repeat protein | location=Tb927_11_01_v4:58168-62238(-) | length=1356	1	46	Tb11.03.0880	hypothetical protein, conserved,predicted WD40 repeat protein	46	44.4	149.06	1356	0.52651	27.664	-0.925467
>GeneDB|Tb11.02.2130 | organism=Trypanosoma_brucei_TREU927 | product=hypothetical protein, conserved | location=Tb927_11_01_v4:1294920-1295819(+) | length=299	1	7	Tb11.02.2130	hypothetical protein, conserved	7	26.4	35.629	299	0.52687	19.922	-0.924481
>GeneDB|Tb927.5.500 | organism=Trypanosoma_brucei_TREU927 | product=hypothetical protein, conserved | location=Tb927_05_v4:156186-160397(-) | length=1403	1	6	Tb927.5.500	hypothetical protein, conserved	6	4.8	153.59	1403	0.52777	31.75	-0.922019
>GeneDB|Tb927.10.15000 | organism=Trypanosoma_brucei_TREU927 | product=hypothetical protein, conserved | location=Tb927_10_v5:3666262-3667530(+) | length=422	1	8	Tb927.10.15000	hypothetical protein, conserved	8	23.9	48.002	422	0.52798	57.994	-0.921445
>GeneDB|Tb11.01.0130 | organism=Trypanosoma_brucei_TREU927 | product=hypothetical protein, conserved | location=Tb927_11_01_v4:2302246-2303031(+) | length=261	1	3	Tb11.01.0130	hypothetical protein, conserved	3	17.6	28.556	261	0.52869	21.165	-0.919506
>GeneDB|Tb11.01.5960 | organism=Trypanosoma_brucei_TREU927 | product=mitochondrial carrier protein, putative | location=Tb927_11_01_v4:3761268-3762287(+) | length=339;>GeneDB|Tb11.01.5950 | organism=Trypanosoma_brucei_TREU927 | product=mitochondrial carrier protein, putative | location=Tb927_11_01_v4:3759511-3760551(+) | length=346	2	6;1	Tb11.01.5960	mitochondrial carrier protein, putative	6	20.6	38.053	339	0.53034	40.375	-0.915011
>GeneDB|Tb927.1.4500 | organism=Trypanosoma_brucei_TREU927 | product=hypothetical protein, conserved | location=Tb927_01_v4:932707-933594(+) | length=295	1	2	Tb927.1.4500	hypothetical protein, conserved	2	7.8	32.525	295	0.53044	28.868	-0.914739
>GeneDB|Tb927.5.1940 | organism=Trypanosoma_brucei_TREU927 | product=hypothetical protein, conserved | location=Tb927_05_v4:599871-600446(+) | length=191	1	6	Tb927.5.1940	hypothetical protein, conserved	6	48.2	21.399	191	0.53061	34.861	-0.914276
>GeneDB|Tb09.211.2450 | organism=Trypanosoma_brucei_TREU927 | product=hypothetical protein, conserved | location=Tb927_09_v4:1713500-1714930(-) | length=476	1	5	Tb09.211.2450	hypothetical protein, conserved	5	18.1	51.895	476	0.53171	34.181	-0.911288
>GeneDB|Tb927.10.5380 | organism=Trypanosoma_brucei_TREU927 | product=intraflagellar transport protein IFT122, putative | location=Tb927_10_v5:1350736-1354464(+) | length=1242	1	47	Tb927.10.5380	intraflagellar transport protein IFT122, putative	47	48.1	139.43	1242	0.53217	35.397	-0.910041
>GeneDB|Tb927.10.1320 | organism=Trypanosoma_brucei_TREU927 | product=hypothetical protein, conserved | location=Tb927_10_v5:350171-352318(-) | length=715	1	3	Tb927.10.1320	hypothetical protein, conserved	3	5.7	77.89	715	0.5324	50.672	-0.909418
>GeneDB|Tb927.3.3770 | organism=Trypanosoma_brucei_TREU927 | product=paraflagellar rod component, putative | location=Tb927_03_v4:1051543-1052403(+) | length=286;>GeneDB|Tb927.3.3790 | organism=Trypanosoma_brucei_TREU927 | product=hypothetical protein, conserved | location=Tb927_03_v4:1054662-1055522(+) | length=286	2	24;24	Tb927.3.3770	paraflagellar rod component, putative	24	77.6	31.661	286	0.53377	34.887	-0.90571
>GeneDB|Tb927.1.4340 | organism=Trypanosoma_brucei_TREU927 | product=hypothetical protein, conserved | location=Tb927_01_v4:899638-901788(+) | length=716	1	7	Tb927.1.4340	hypothetical protein, conserved	7	18.3	77.649	716	0.53419	58.087	-0.904575
>GeneDB|Tb927.1.1750 | organism=Trypanosoma_brucei_TREU927 | product=hypothetical protein, conserved | location=Tb927_01_v4:463474-464886(+) | length=470	1	1	Tb927.1.1750	hypothetical protein, conserved	1	4.5	49.619	470	0.53529	19.88	-0.901607
>GeneDB|Tb11.01.4621 | organism=Trypanosoma_brucei_TREU927 | product=calmodulin | location=Tb927_11_01_v4:3424725-3425174(-) | length=149;>GeneDB|Tb11.01.4622 | organism=Trypanosoma_brucei_TREU927 | product=calmodulin | location=Tb927_11_01_v4:3426403-3426852(-) | length=149;>GeneDB|Tb11.01.4623 | organism=Trypanosoma_brucei_TREU927 | product=calmodulin | location=Tb927_11_01_v4:3425564-3426013(-…	4	19;19;19;19	Tb11.01.4621	calmodulin	19	96	16.838	149	0.53608	52.868	-0.89948
>GeneDB|Tb11.01.7760 | organism=Trypanosoma_brucei_TREU927 | product=ubiquitin carboxyl-terminal hydrolase, putative | location=Tb927_11_01_v4:4202041-4205595(-) | length=1184	1	6	Tb11.01.7760	ubiquitin carboxyl-terminal hydrolase, putative	6	7.4	131.25	1184	0.53859	89.667	-0.892741
>GeneDB|Tb927.3.2950 | organism=Trypanosoma_brucei_TREU927 | product=hypothetical protein, conserved,leucine-rich repeat protein (LRRP), putative,ribonuclease inhibitor- like protein | location=Tb927_03_v4:760614-762893(-) | length=759	1	8	Tb927.3.2950	hypothetical protein, conserved,leucine-rich repeat protein (LRRP), putative,ribonuclease inhibitor- like protein	8	12.9	83.837	759	0.53859	26.632	-0.892741
>GeneDB|Tb927.4.4970 | organism=Trypanosoma_brucei_TREU927 | product=myosin heavy chain kinase A, putative | location=Tb927_04_v4:1364694-1365677(-) | length=327	1	1	Tb927.4.4970	myosin heavy chain kinase A, putative	1	7	37.052	327	0.53901	10.451	-0.891616
>GeneDB|Tb927.1.4310 | organism=Trypanosoma_brucei_TREU927 | product=hypothetical protein, conserved | location=Tb927_01_v4:890927-895843(+) | length=1638;REV__>REV_GeneDB|Tb927.10.6150 Reverse sequence, was | organism=Trypanosoma_brucei_TREU927 | product=neurobeachin/beige protein, putative | location=Tb927_10_v5:1549165-1558890(-) | length=3241	2	74;1	Tb927.1.4310	hypothetical protein, conserved	74	49.9	183.76	1638	0.53912	38.836	-0.891322
>GeneDB|Tb927.10.3920 | organism=Trypanosoma_brucei_TREU927 | product=hypothetical protein, conserved | location=Tb927_10_v5:1041368-1042834(-) | length=488	1	7	Tb927.10.3920	hypothetical protein, conserved	7	21.1	52.969	488	0.53952	47.891	-0.890252
>GeneDB|Tb927.3.5550 | organism=Trypanosoma_brucei_TREU927 | product=small GTP-binding protein, putative | location=Tb927_03_v4:1558311-1558862(+) | length=183	1	7	Tb927.3.5550	small GTP-binding protein, putative	7	46.4	20.638	183	0.53956	27.925	-0.890145
>GeneDB|Tb11.01.3740 | organism=Trypanosoma_brucei_TREU927 | product=coatomer gamma subunit, putative,cytosolic coat protein, putative | location=Tb927_11_01_v4:3120728-3123364(+) | length=878	1	33	Tb11.01.3740	coatomer gamma subunit, putative,cytosolic coat protein, putative	33	51.7	97.586	878	0.54067	35.039	-0.88718
>GeneDB|Tb927.1.3000 | organism=Trypanosoma_brucei_TREU927 | product=aminoacylase, putative,N-acyl-L-amino acid amidohydrolase, putative | location=Tb927_01_v4:667007-668215(+) | length=402	1	9	Tb927.1.3000	aminoacylase, putative,N-acyl-L-amino acid amidohydrolase, putative	9	35.1	42.938	402	0.54136	39.009	-0.88534
>GeneDB|Tb927.10.4610 | organism=Trypanosoma_brucei_TREU927 | product=dolicholphosphate-mannose synthase, putative;with=GeneDB:LmjF36.0220 | location=Tb927_10_v5:1174838-1175617(-) | length=259	1	11	Tb927.10.4610	dolicholphosphate-mannose synthase, putative;with=GeneDB:LmjF36.0220	11	54.4	29.086	259	0.54176	28.945	-0.884274
>GeneDB|Tb09.211.4920 | organism=Trypanosoma_brucei_TREU927 | product=dynein-associated protein, putative | location=Tb927_09_v4:2209364-2209660(-) | length=98	1	5	Tb09.211.4920	dynein-associated protein, putative	5	83.7	11.13	98	0.54214	107.98	-0.883263
>GeneDB|Tb09.211.3750 | organism=Trypanosoma_brucei_TREU927 | product=hypothetical protein, conserved | location=Tb927_09_v4:1970153-1973332(+) | length=1059	1	3	Tb09.211.3750	hypothetical protein, conserved	3	3.8	120.05	1059	0.54252	30.604	-0.882252
>GeneDB|Tb11.02.1260 | organism=Trypanosoma_brucei_TREU927 | product=hypothetical protein, conserved | location=Tb927_11_01_v4:1090029-1090817(+) | length=262	1	10	Tb11.02.1260	hypothetical protein, conserved	10	36.3	28.985	262	0.54255	16.916	-0.882172
>GeneDB|Tb927.5.1880 | organism=Trypanosoma_brucei_TREU927 | product=inhibitor of serine peptidase (ISP), putative,ecotin family (I11), putative | location=Tb927_05_v4:583505-583969(+) | length=154	1	6	Tb927.5.1880	inhibitor of serine peptidase (ISP), putative,ecotin family (I11), putative	6	64.9	17.81	154	0.54282	23.094	-0.881454
>GeneDB|Tb11.02.1830 | organism=Trypanosoma_brucei_TREU927 | product=40S ribosomal protein S12 | location=Tb927_11_01_v4:1228870-1229304(-) | length=144	1	3	Tb11.02.1830	40S ribosomal protein S12	3	34.7	15.869	144	0.54303	71.45	-0.880896
>GeneDB|Tb927.10.9570 | organism=Trypanosoma_brucei_TREU927 | product=paraflagellar rod component, putative | location=Tb927_10_v5:2360337-2363585(+) | length=1082;>REV_GeneDB|Tb927.10.9570 Reverse sequence, was | organism=Trypanosoma_brucei_TREU927 | product=paraflagellar rod component, putative | location=Tb927_10_v5:2360337-2363585(+) | length=1082;REV__>GeneDB|Tb927.3.4500 | organism=Trypanos…	3	62;1;1	Tb927.10.9570	paraflagellar rod component, putative	62	79.6	118.67	1082	0.54369	25.197	-0.879144
>GeneDB|Tb927.8.2860 | organism=Trypanosoma_brucei_TREU927 | product=hypothetical protein, conserved | location=Tb927_08_v4:865608-868304(-) | length=898	1	8	Tb927.8.2860	hypothetical protein, conserved	8	13.3	99.326	898	0.54461	20.913	-0.876705
>GeneDB|Tb927.7.4460 | organism=Trypanosoma_brucei_TREU927 | product=hypothetical protein, conserved | location=Tb927_07_v4:1185804-1188332(-) | length=842	1	15	Tb927.7.4460	hypothetical protein, conserved	15	23.8	91.199	842	0.54465	29.709	-0.876599
>GeneDB|Tb11.02.3500 | organism=Trypanosoma_brucei_TREU927 | product=hypothetical protein, conserved | location=Tb927_11_01_v4:1604354-1607110(+) | length=918	1	3	Tb11.02.3500	hypothetical protein, conserved	3	3.1	103.85	918	0.54521	23.765	-0.875116
>GeneDB|Tb11.02.2530 | organism=Trypanosoma_brucei_TREU927 | product=hypothetical protein, conserved | location=Tb927_11_01_v4:1381408-1382226(+) | length=272	1	11	Tb11.02.2530	hypothetical protein, conserved	11	49.6	30.707	272	0.54564	33.387	-0.873979
>GeneDB|Tb11.01.4030 | organism=Trypanosoma_brucei_TREU927 | product=hypothetical protein, conserved | location=Tb927_11_01_v4:3197537-3198412(+) | length=291	1	18	Tb11.01.4030	hypothetical protein, conserved	18	68	32.43	291	0.54625	22.371	-0.872367
>GeneDB|Tb927.7.4520 | organism=Trypanosoma_brucei_TREU927 | product=hypothetical protein, conserved | location=Tb927_07_v4:1204266-1204871(-) | length=201	1	14	Tb927.7.4520	hypothetical protein, conserved	14	60.7	22.315	201	0.54694	21.877	-0.870546
>GeneDB|Tb927.7.3310 | organism=Trypanosoma_brucei_TREU927 | product=hypothetical protein, conserved | location=Tb927_07_v4:853860-854930(-) | length=356	1	3	Tb927.7.3310	hypothetical protein, conserved	3	16.6	38.535	356	0.54701	30.658	-0.870361
>GeneDB|Tb11.02.0352 | organism=Trypanosoma_brucei_TREU927 | product=hypothetical protein, conserved | location=Tb927_11_01_v4:790487-791299(-) | length=270	1	4	Tb11.02.0352	hypothetical protein, conserved	4	25.2	31.598	270	0.54817	31.953	-0.867305
>GeneDB|Tb927.10.3350 | organism=Trypanosoma_brucei_TREU927 | product=hypothetical protein, conserved | location=Tb927_10_v5:864807-866444(+) | length=545	1	1	Tb927.10.3350	hypothetical protein, conserved	1	2.4	60.283	545	0.54833	32.882	-0.866884
>GeneDB|Tb927.4.1610 | organism=Trypanosoma_brucei_TREU927 | product=hypothetical protein, conserved | location=Tb927_04_v4:412402-413481(-) | length=359	1	3	Tb927.4.1610	hypothetical protein, conserved	3	8.6	39.631	359	0.54972	37.178	-0.863231
>GeneDB|Tb927.1.3820 | organism=Trypanosoma_brucei_TREU927 | product=ATP synthase subunit, putative | location=Tb927_01_v4:815748-816149(+) | length=133	1	2	Tb927.1.3820	ATP synthase subunit, putative	2	39.8	14.198	133	0.55045	12.813	-0.861317
>GeneDB|Tb927.3.2310 | organism=Trypanosoma_brucei_TREU927 | product=flagellar component,PACRGA | location=Tb927_03_v4:593475-594377(+) | length=300	1	15	Tb927.3.2310	flagellar component,PACRGA	15	64	33.785	300	0.55055	34.165	-0.861055
>GeneDB|Tb927.2.2670 | organism=Trypanosoma_brucei_TREU927 | product=histone H4, putative | location=Tb927_02_v4:531130-531432(+) | length=100	1	2	Tb927.2.2670	histone H4, putative	2	22	11.253	100	0.55091	38.798	-0.860111
>GeneDB|Tb927.8.5230 | organism=Trypanosoma_brucei_TREU927 | product=cyclophilin-type peptidyl-prolyl cis-trans isomerase, putative,PPIase, putative,rotamase, putative,cyclophilin, putative | location=Tb927_08_v4:1563400-1564248(+) | length=243	1	6	Tb927.8.5230	cyclophilin-type peptidyl-prolyl cis-trans isomerase, putative,PPIase, putative,rotamase, putative,cyclophilin, putative	6	32.9	26.401	243	0.55129	53.662	-0.859117
>GeneDB|Tb927.3.4290 | organism=Trypanosoma_brucei_TREU927 | product=PFR1 | location=Tb927_03_v4:1208995-1210764(-) | length=589;>GeneDB|Tb927.3.4300 | organism=Trypanosoma_brucei_TREU927 | product=73 kDa paraflagellar rod protein,PFR1 | location=Tb927_03_v4:1211158-1212927(-) | length=589;>GeneDB|Tb927.3.4310 | organism=Trypanosoma_brucei_TREU927 | product=73 kDa paraflagellar rod protein,PFR1 |…	7	73;73;73;73;73;1;1	Tb927.3.4290	PFR1	73	84.6	68.682	589	0.55151	36.601	-0.858541
>GeneDB|Tb09.160.0600 | organism=Trypanosoma_brucei_TREU927 | product=hypothetical protein, conserved | location=Tb927_09_v4:379074-380879(-) | length=601	1	6	Tb09.160.0600	hypothetical protein, conserved	6	11.6	67.667	601	0.55159	10.599	-0.858332
>GeneDB|Tb927.6.4180 | organism=Trypanosoma_brucei_TREU927 | product=hypothetical protein, conserved | location=Tb927_06_v4:1201682-1202131(-) | length=149	1	3	Tb927.6.4180	hypothetical protein, conserved	3	25.5	16.327	149	0.55248	26.305	-0.856006
>GeneDB|Tb927.5.4380 | organism=Trypanosoma_brucei_TREU927 | product=kinetoplastid-specific phospho-protein phosphatase, putative | location=Tb927_05_v4:1303567-1305477(-) | length=636;REV__>GeneDB|Tb927.10.8150 | organism=Trypanosoma_brucei_TREU927 | product=hypothetical protein, conserved,predicted bromodomain protein | location=Tb927_10_v5:2025942-2026847(-) | length=301	2	23;1	Tb927.5.4380	kinetoplastid-specific phospho-protein phosphatase, putative	23	46.5	71.37	636	0.55439	52.734	-0.851027
>GeneDB|Tb11.01.1980 | organism=Trypanosoma_brucei_TREU927 | product=hypothetical protein, conserved | location=Tb927_11_01_v4:2680856-2681212(+) | length=118	1	5	Tb11.01.1980	hypothetical protein, conserved	5	40.7	12.738	118	0.55441	52.578	-0.850975
>GeneDB|Tb927.1.3300 | organism=Trypanosoma_brucei_TREU927 | product=myotubularin, putative,zinc-binding phosphatase, putative | location=Tb927_01_v4:717984-720602(+) | length=872	1	12	Tb927.1.3300	myotubularin, putative,zinc-binding phosphatase, putative	12	22.2	97.543	872	0.5545	29.283	-0.850741
>GeneDB|Tb927.5.2270 | organism=Trypanosoma_brucei_TREU927 | product=hypothetical protein, conserved | location=Tb927_05_v4:705755-707191(+) | length=478	1	2	Tb927.5.2270	hypothetical protein, conserved	2	4.8	53.67	478	0.55523	20.938	-0.848843
>GeneDB|Tb11.47.0013 | organism=Trypanosoma_brucei_TREU927 | product=hypothetical protein, conserved | location=Tb927_11_01_v4:387193-388899(+) | length=568	1	1	Tb11.47.0013	hypothetical protein, conserved	1	3.3	62.477	568	0.55534	6.5193	-0.848557
>GeneDB|Tb927.5.3210 | organism=Trypanosoma_brucei_TREU927 | product=small ubiquitin-related modifier, putative | location=Tb927_05_v4:998681-999025(-) | length=114	1	3	Tb927.5.3210	small ubiquitin-related modifier, putative	3	28.1	12.378	114	0.55537	33.987	-0.848479
>GeneDB|Tb927.10.1990 | organism=Trypanosoma_brucei_TREU927 | product=major vault protein, putative | location=Tb927_10_v5:521750-524341(+) | length=863	1	31	Tb927.10.1990	major vault protein, putative	31	51.6	95.062	863	0.55544	47.819	-0.848297
>GeneDB|Tb927.8.4970 | organism=Trypanosoma_brucei_TREU927 | product=PFR2 | location=Tb927_08_v4:1474818-1476620(+) | length=600;>GeneDB|Tb927.8.4980 | organism=Trypanosoma_brucei_TREU927 | product=69 kDa paraflagellar rod protein,PFR2 | location=Tb927_08_v4:1476972-1478774(+) | length=600;>GeneDB|Tb927.8.4990 | organism=Trypanosoma_brucei_TREU927 | product=69 kDa paraflagellar rod protein,PFR2 |…	8	68;68;68;68;68;0;0;0	Tb927.8.4970	PFR2	68	83.5	69.596	600	0.55555	28.05	-0.848011
>GeneDB|Tb927.7.4470 | organism=Trypanosoma_brucei_TREU927 | product=hypothetical protein, conserved | location=Tb927_07_v4:1190379-1190960(-) | length=193	1	7	Tb927.7.4470	hypothetical protein, conserved	7	30.1	22.398	193	0.55572	36.265	-0.84757
>GeneDB|Tb11.01.6890 | organism=Trypanosoma_brucei_TREU927 | product=small GTPase, putative,ras-related protein rab-2a, putative | location=Tb927_11_01_v4:3987563-3988201(-) | length=212	1	11	Tb11.01.6890	small GTPase, putative,ras-related protein rab-2a, putative	11	67.9	23.511	212	0.55763	31.934	-0.84262
>GeneDB|Tb927.4.5000 | organism=Trypanosoma_brucei_TREU927 | product=hypothetical protein, conserved | location=Tb927_04_v4:1367938-1370517(-) | length=859	1	1	Tb927.4.5000	hypothetical protein, conserved	1	2.2	96.392	859	0.5583	25.712	-0.840888
>GeneDB|Tb927.10.8970 | organism=Trypanosoma_brucei_TREU927 | product=kinetoplast DNA-associated protein, putative | location=Tb927_10_v5:2226099-2226482(+) | length=127;>GeneDB|Tb927.10.8950 | organism=Trypanosoma_brucei_TREU927 | product=kinetoplast DNA-associated protein, putative | location=Tb927_10_v5:2223104-2223484(+) | length=126	2	5;5	Tb927.10.8970	kinetoplast DNA-associated protein, putative	5	23.6	14.271	127	0.55942	12.597	-0.837996
>GeneDB|Tb927.5.3030 | organism=Trypanosoma_brucei_TREU927 | product=intraflagellar transport protein IFT122, putative | location=Tb927_05_v4:948230-952012(+) | length=1260	1	41	Tb927.5.3030	intraflagellar transport protein IFT122, putative	41	42.6	140.63	1260	0.55949	38.767	-0.837816
>GeneDB|Tb927.8.6240 | organism=Trypanosoma_brucei_TREU927 | product=hypothetical protein, conserved | location=Tb927_08_v4:1814348-1815148(+) | length=266	1	19	Tb927.8.6240	hypothetical protein, conserved	19	76.3	30.042	266	0.5599	45.349	-0.836759
>GeneDB|Tb09.211.4820 | organism=Trypanosoma_brucei_TREU927 | product=hypothetical protein, conserved | location=Tb927_09_v4:2188793-2190199(-) | length=468	1	4	Tb09.211.4820	hypothetical protein, conserved	4	14.7	49.833	468	0.56011	75.42	-0.836218
>GeneDB|Tb927.4.920 | organism=Trypanosoma_brucei_TREU927 | product=hypothetical protein, conserved | location=Tb927_04_v4:259398-260159(-) | length=253	1	8	Tb927.4.920	hypothetical protein, conserved	8	34	28.089	253	0.56071	82.023	-0.834673
>GeneDB|Tb09.160.3960 | organism=Trypanosoma_brucei_TREU927 | product=actin, putative | location=Tb927_09_v4:892805-894070(+) | length=421	1	7	Tb09.160.3960	actin, putative	7	23	46.749	421	0.56091	152.04	-0.834159
>GeneDB|Tb927.1.2750 | organism=Trypanosoma_brucei_TREU927 | product=hypothetical protein, conserved | location=Tb927_01_v4:633365-633871(+) | length=168	1	11	Tb927.1.2750	hypothetical protein, conserved	11	69.6	18.698	168	0.56111	21.652	-0.833644
>GeneDB|Tb927.4.2840 | organism=Trypanosoma_brucei_TREU927 | product=hypothetical protein, conserved | location=Tb927_04_v4:750490-751239(+) | length=249	1	10	Tb927.4.2840	hypothetical protein, conserved	10	72.3	28.087	249	0.56136	24.694	-0.833002
>GeneDB|Tb11.02.0354 | organism=Trypanosoma_brucei_TREU927 | product=hypothetical protein, conserved | location=Tb927_11_01_v4:794698-796827(-) | length=709	1	9	Tb11.02.0354	hypothetical protein, conserved	9	15.1	80.033	709	0.56265	37.602	-0.82969
>GeneDB|Tb11.01.4880 | organism=Trypanosoma_brucei_TREU927 | product=hypothetical protein, conserved | location=Tb927_11_01_v4:3505763-3506233(-) | length=156	1	5	Tb11.01.4880	hypothetical protein, conserved	5	34	16.922	156	0.56266	29.212	-0.829665
>GeneDB|Tb927.6.3840 | organism=Trypanosoma_brucei_TREU927 | product=reticulon domain protein | location=Tb927_06_v4:1139494-1140054(-) | length=186	1	10	Tb927.6.3840	reticulon domain protein	10	51.6	21.071	186	0.56287	44.572	-0.829126
>GeneDB|Tb11.01.6310 | organism=Trypanosoma_brucei_TREU927 | product=hypothetical protein, conserved | location=Tb927_11_01_v4:3848861-3849880(-) | length=339	1	2	Tb11.01.6310	hypothetical protein, conserved	2	10.3	38.473	339	0.56308	6.5582	-0.828588
>GeneDB|Tb927.5.1730 | organism=Trypanosoma_brucei_TREU927 | product=inhibitor of serine peptidase (ISP), putative,ecotin family (I11), putative | location=Tb927_05_v4:545498-545995(+) | length=165	1	7	Tb927.5.1730	inhibitor of serine peptidase (ISP), putative,ecotin family (I11), putative	7	44.2	19.342	165	0.56325	24.23	-0.828153
>GeneDB|Tb927.7.7040 | organism=Trypanosoma_brucei_TREU927 | product=methylthioadenosine phosphorylase, putative | location=Tb927_07_v4:2012694-2013623(-) | length=309	1	17	Tb927.7.7040	methylthioadenosine phosphorylase, putative	17	78.6	33.443	309	0.56334	34.219	-0.827922
>GeneDB|Tb09.211.4430 | organism=Trypanosoma_brucei_TREU927 | product=helicase, putative | location=Tb927_09_v4:2107660-2111652(-) | length=1330	1	15	Tb09.211.4430	helicase, putative	15	13.9	149.24	1330	0.56371	133.08	-0.826975
>GeneDB|Tb927.7.820 | organism=Trypanosoma_brucei_TREU927 | product=dynein arm light chain, axonemal, putative | location=Tb927_07_v4:189746-190666(-) | length=306	1	2	Tb927.7.820	dynein arm light chain, axonemal, putative	2	6.9	34.365	306	0.56435	10.241	-0.825338
>GeneDB|Tb11.03.0910 | organism=Trypanosoma_brucei_TREU927 | product=cleavage and polyadenylation specificity factor, putative | location=Tb927_11_01_v4:49807-52263(-) | length=818	1	7	Tb11.03.0910	cleavage and polyadenylation specificity factor, putative	7	12.8	90.555	818	0.56452	12.785	-0.824903
>GeneDB|Tb927.10.15250 | organism=Trypanosoma_brucei_TREU927 | product=paraflagellar rod component, putative | location=Tb927_10_v5:3716678-3718135(+) | length=485	1	26	Tb927.10.15250	paraflagellar rod component, putative	26	51.8	57.813	485	0.56467	44.701	-0.82452
>GeneDB|Tb927.1.690 | organism=Trypanosoma_brucei_TREU927 | product=hypothetical protein, conserved | location=Tb927_01_v4:230797-231528(-) | length=243	1	1	Tb927.1.690	hypothetical protein, conserved	1	7	27.397	243	0.5653	19.541	-0.822911
>GeneDB|Tb11.01.5240 | organism=Trypanosoma_brucei_TREU927 | product=hypothetical protein, conserved | location=Tb927_11_01_v4:3580721-3585595(-) | length=1624	1	8	Tb11.01.5240	hypothetical protein, conserved	8	7.2	183.5	1624	0.5656	22.81	-0.822146
>GeneDB|Tb927.10.8830 | organism=Trypanosoma_brucei_TREU927 | product=hypothetical protein, conserved | location=Tb927_10_v5:2183969-2185726(+) | length=585	1	5	Tb927.10.8830	hypothetical protein, conserved	5	11.3	66.659	585	0.56586	30.591	-0.821483
>GeneDB|Tb927.5.4460 | organism=Trypanosoma_brucei_TREU927 | product=major vault protein, putative | location=Tb927_05_v4:1317769-1320285(-) | length=838	1	31	Tb927.5.4460	major vault protein, putative	31	47.4	94.102	838	0.56644	32.56	-0.820005
>GeneDB|Tb927.7.2790 | organism=Trypanosoma_brucei_TREU927 | product=hypothetical protein, conserved | location=Tb927_07_v4:723558-725663(+) | length=701	1	10	Tb927.7.2790	hypothetical protein, conserved	10	19.3	79.302	701	0.56645	22.668	-0.819979
>GeneDB|Tb927.1.2670 | organism=Trypanosoma_brucei_TREU927 | product=flagellar protein PF16 | location=Tb927_01_v4:618929-620470(+) | length=513;>REV_GeneDB|Tb09.160.3470 Reverse sequence, was | organism=Trypanosoma_brucei_TREU927 | product=condensin subunit 1, putative | location=Tb927_09_v4:836962-840738(+) | length=1258	2	25;1	Tb927.1.2670	flagellar protein PF16	25	70.8	56.126	513	0.56661	28.808	-0.819572
>GeneDB|Tb927.8.4480 | organism=Trypanosoma_brucei_TREU927 | product=hypothetical protein, conserved | location=Tb927_08_v4:1325999-1326793(-) | length=264	1	2	Tb927.8.4480	hypothetical protein, conserved	2	18.6	28.604	264	0.56662	9.4744	-0.819547
>GeneDB|Tb09.211.4630 | organism=Trypanosoma_brucei_TREU927 | product=hypothetical protein, conserved | location=Tb927_09_v4:2148668-2149612(-) | length=314	1	9	Tb09.211.4630	hypothetical protein, conserved	9	43.9	34.916	314	0.56771	25.071	-0.816774
>GeneDB|Tb927.10.15770 | organism=Trypanosoma_brucei_TREU927 | product=hypothetical protein, conserved | location=Tb927_10_v5:3897950-3899344(+) | length=464	1	1	Tb927.10.15770	hypothetical protein, conserved	1	3.2	50.59	464	0.56806	18.847	-0.815885
>GeneDB|Tb927.10.13250 | organism=Trypanosoma_brucei_TREU927 | product=hypothetical protein, conserved | location=Tb927_10_v5:3224502-3230234(-) | length=1910	1	4	Tb927.10.13250	hypothetical protein, conserved	4	3.5	206.3	1910	0.5689	73.536	-0.813753
>GeneDB|Tb09.211.0170 | organism=Trypanosoma_brucei_TREU927 | product=hypothetical protein, conserved | location=Tb927_09_v4:1294024-1294788(-) | length=254	1	9	Tb09.211.0170	hypothetical protein, conserved	9	53.1	28.802	254	0.5691	25.666	-0.813246
>GeneDB|Tb11.01.6060 | organism=Trypanosoma_brucei_TREU927 | product=ADP-ribosylation factor GTPase activating protein 1, putative | location=Tb927_11_01_v4:3784487-3785410(+) | length=307	1	6	Tb11.01.6060	ADP-ribosylation factor GTPase activating protein 1, putative	6	23.1	34.004	307	0.57021	17.762	-0.810435
>GeneDB|Tb927.1.3880 | organism=Trypanosoma_brucei_TREU927 | product=hypothetical protein, conserved | location=Tb927_01_v4:827008-832221(+) | length=1737	1	2	Tb927.1.3880	hypothetical protein, conserved	2	2	188.01	1737	0.57026	6.8613	-0.810308
>GeneDB|Tb927.10.2490 | organism=Trypanosoma_brucei_TREU927 | product=glucose-6-phosphate 1-dehydrogenase | location=Tb927_10_v5:648370-650046(+) | length=558;REV__>REV_GeneDB|Tb927.4.4760 Reverse sequence, was | organism=Trypanosoma_brucei_TREU927 | product=hypothetical protein, conserved | location=Tb927_04_v4:1306944-1309805(-) | length=953	2	21;1	Tb927.10.2490	glucose-6-phosphate 1-dehydrogenase	21	52.7	63.503	558	0.57103	28.861	-0.808362
>GeneDB|Tb11.01.1210 | organism=Trypanosoma_brucei_TREU927 | product=hypothetical protein, conserved | location=Tb927_11_01_v4:2531306-2532964(-) | length=552	1	8	Tb11.01.1210	hypothetical protein, conserved	8	22.5	61.765	552	0.57171	35.469	-0.806645
>GeneDB|Tb11.01.5780 | organism=Trypanosoma_brucei_TREU927 | product=hypothetical protein, conserved | location=Tb927_11_01_v4:3701694-3704468(+) | length=924	1	40	Tb11.01.5780	hypothetical protein, conserved	40	48.7	100.47	924	0.5723	28.752	-0.805156
>GeneDB|Tb11.01.1770 | organism=Trypanosoma_brucei_TREU927 | product=vacuolar sorting-associated protein-like, putative | location=Tb927_11_01_v4:2640740-2641813(+) | length=357	1	5	Tb11.01.1770	vacuolar sorting-associated protein-like, putative	5	21.6	41.363	357	0.57236	27.031	-0.805005
>GeneDB|Tb927.6.1770 | organism=Trypanosoma_brucei_TREU927 | product=kinesin, putative | location=Tb927_06_v4:591561-593447(-) | length=628	1	21	Tb927.6.1770	kinesin, putative	21	43.6	69.409	628	0.57312	44.757	-0.803091
>GeneDB|Tb927.10.2130 | organism=Trypanosoma_brucei_TREU927 | product=hypothetical protein, conserved | location=Tb927_10_v5:552066-554795(+) | length=909	1	2	Tb927.10.2130	hypothetical protein, conserved	2	3.9	100.03	909	0.57321	30.207	-0.802864
>GeneDB|Tb11.47.0036 | organism=Trypanosoma_brucei_TREU927 | product=calpain, putative,cysteine peptidase, Clan CA, family C2, putative | location=Tb927_11_01_v4:296685-300914(+) | length=1409	1	6	Tb11.47.0036	calpain, putative,cysteine peptidase, Clan CA, family C2, putative	6	6.1	158.95	1409	0.57412	67.453	-0.800576
>GeneDB|Tb11.01.1850 | organism=Trypanosoma_brucei_TREU927 | product=hypothetical protein, conserved | location=Tb927_11_01_v4:2651869-2653116(+) | length=415	1	9	Tb11.01.1850	hypothetical protein, conserved	9	32	46.367	415	0.57443	19.654	-0.799797
>GeneDB|Tb927.3.1990 | organism=Trypanosoma_brucei_TREU927 | product=hypothetical protein, conserved | location=Tb927_03_v4:519447-520892(-) | length=481	1	5	Tb927.3.1990	hypothetical protein, conserved	5	16	53.496	481	0.57488	18.972	-0.798667
>GeneDB|Tb927.7.5190 | organism=Trypanosoma_brucei_TREU927 | product=hypothetical protein, conserved | location=Tb927_07_v4:1365358-1368912(+) | length=1184	1	2	Tb927.7.5190	hypothetical protein, conserved	2	1.7	126.87	1184	0.57496	32.186	-0.798467
>GeneDB|Tb11.03.0470 | organism=Trypanosoma_brucei_TREU927 | product=hypothetical protein, conserved | location=Tb927_11_01_v4:148249-149319(-) | length=356	1	8	Tb11.03.0470	hypothetical protein, conserved	8	39	40.542	356	0.576	25.939	-0.795859
>GeneDB|Tb11.02.0190 | organism=Trypanosoma_brucei_TREU927 | product=hypothetical protein, conserved | location=Tb927_11_01_v4:738838-742083(-) | length=1081	1	2	Tb11.02.0190	hypothetical protein, conserved	2	4.3	121.14	1081	0.57723	53.22	-0.792782
>GeneDB|Tb927.8.4240 | organism=Trypanosoma_brucei_TREU927 | product=hypothetical protein, conserved | location=Tb927_08_v4:1257854-1262923(-) | length=1689	1	2	Tb927.8.4240	hypothetical protein, conserved	2	2.7	183.88	1689	0.57774	93.603	-0.791508
>GeneDB|Tb927.4.5720 | organism=Trypanosoma_brucei_TREU927 | product=variant surface glycoprotein (VSG, pseudogene), putative,variant surface glycoprotein, degenerate | location=Tb927_04_v4:1571710-1573164(-) | length=484	1	2	Tb927.4.5720	variant surface glycoprotein (VSG, pseudogene), putative,variant surface glycoprotein, degenerate	2	4.8	53.903	484	0.57783	136.34	-0.791283
>GeneDB|Tb11.01.6530 | organism=Trypanosoma_brucei_TREU927 | product=coatomer epsilon subunit, putative,cytosolic coat protein, putative | location=Tb927_11_01_v4:3896231-3897205(-) | length=324	1	13	Tb11.01.6530	coatomer epsilon subunit, putative,cytosolic coat protein, putative	13	58.6	34.594	324	0.57798	54.668	-0.790909
>GeneDB|Tb09.160.3020 | organism=Trypanosoma_brucei_TREU927 | product=hypothetical protein, conserved | location=Tb927_09_v4:775168-776415(+) | length=415	1	3	Tb09.160.3020	hypothetical protein, conserved	3	11.8	46.604	415	0.57801	21.803	-0.790834
>GeneDB|Tb927.4.2740 | organism=Trypanosoma_brucei_TREU927 | product=hypothetical protein, conserved | location=Tb927_04_v4:723054-723506(+) | length=150	1	14	Tb927.4.2740	hypothetical protein, conserved	14	74	16.327	150	0.57815	22.589	-0.790484
>GeneDB|Tb927.3.3190 | organism=Trypanosoma_brucei_TREU927 | product=serine/threonine-protein kinase, putative,protein kinase, putative | location=Tb927_03_v4:824115-825626(-) | length=503	1	18	Tb927.3.3190	serine/threonine-protein kinase, putative,protein kinase, putative	18	56.5	56.152	503	0.57842	20.96	-0.789811
>GeneDB|Tb927.7.4490 | organism=Trypanosoma_brucei_TREU927 | product=hypothetical protein, conserved | location=Tb927_07_v4:1193704-1198635(-) | length=1643	1	2	Tb927.7.4490	hypothetical protein, conserved	2	1.7	180.77	1643	0.57847	45.337	-0.789686
>GeneDB|Tb927.5.800 | organism=Trypanosoma_brucei_TREU927 | product=casein kinase I, isoform 2 | location=Tb927_05_v4:272390-273388(+) | length=332;>GeneDB|Tb927.5.790 | organism=Trypanosoma_brucei_TREU927 | product=casein kinase I isoform 1 | location=Tb927_05_v4:269299-270291(+) | length=330	2	20;9	Tb927.5.800	casein kinase I, isoform 2	20	55.7	38.374	332	0.57854	76.655	-0.789511
>GeneDB|Tb09.160.3930 | organism=Trypanosoma_brucei_TREU927 | product=hypothetical protein, conserved | location=Tb927_09_v4:891124-892017(+) | length=297	1	6	Tb09.160.3930	hypothetical protein, conserved	6	29.3	34.163	297	0.57877	46.362	-0.788938
>GeneDB|Tb927.8.2050 | organism=Trypanosoma_brucei_TREU927 | product=GDP-mannose pyrophosphorylase | location=Tb927_08_v4:642645-643754(+) | length=369	1	11	Tb927.8.2050	GDP-mannose pyrophosphorylase	11	39.6	40.704	369	0.57894	20.309	-0.788514
>GeneDB|Tb927.10.830 | organism=Trypanosoma_brucei_TREU927 | product=adenylate kinase, putative | location=Tb927_10_v5:215236-216018(+) | length=260	1	15	Tb927.10.830	adenylate kinase, putative	15	68.8	29.765	260	0.57917	35.841	-0.787941
>GeneDB|Tb927.6.4610 | organism=Trypanosoma_brucei_TREU927 | product=hypothetical protein, conserved | location=Tb927_06_v4:1290871-1292112(+) | length=413	1	6	Tb927.6.4610	hypothetical protein, conserved	6	17.2	46.439	413	0.57927	77.783	-0.787692
>GeneDB|Tb927.4.190 | organism=Trypanosoma_brucei_TREU927 | product=retrotransposon hot spot protein (RHS, pseudogene), putative,retrotransposon hot spot protein (RHS), degenerate | location=Tb927_04_v4:27790-28422(+) | length=209	1	1	Tb927.4.190	retrotransposon hot spot protein (RHS, pseudogene), putative,retrotransposon hot spot protein (RHS), degenerate	1	5.3	23.386	209	0.58004	7.3668	-0.785776
>GeneDB|Tb927.1.4180 | organism=Trypanosoma_brucei_TREU927 | product=hypothetical protein, conserved,leucine-rich repeat protein (LRRP), putative | location=Tb927_01_v4:868118-870352(+) | length=744	1	10	Tb927.1.4180	hypothetical protein, conserved,leucine-rich repeat protein (LRRP), putative	10	20.6	81.988	744	0.58049	45.766	-0.784657
>GeneDB|Tb927.8.6660 | organism=Trypanosoma_brucei_TREU927 | product=paraflagellar rod component, putative | location=Tb927_08_v4:1928929-1930752(-) | length=607	1	35	Tb927.8.6660	paraflagellar rod component, putative	35	70	69.055	607	0.58143	27.725	-0.782323
>GeneDB|Tb11.02.2350 | organism=Trypanosoma_brucei_TREU927 | product=paraflagellar rod component, putative | location=Tb927_11_01_v4:1337909-1339453(+) | length=514	1	1	Tb11.02.2350	paraflagellar rod component, putative	1	3.5	58.127	514	0.5825	40.271	-0.77967
>GeneDB|Tb927.5.2850 | organism=Trypanosoma_brucei_TREU927 | product=radial spoke protein RSP2, putative | location=Tb927_05_v4:897068-898624(-) | length=518	1	12	Tb927.5.2850	radial spoke protein RSP2, putative	12	30.1	57.586	518	0.5825	21.154	-0.77967
>GeneDB|Tb927.10.14520 | organism=Trypanosoma_brucei_TREU927 | product=hypothetical protein, conserved | location=Tb927_10_v5:3550740-3552140(-) | length=466	1	7	Tb927.10.14520	hypothetical protein, conserved	7	30.5	51.566	466	0.58272	18.468	-0.779125
>GeneDB|Tb11.02.0140 | organism=Trypanosoma_brucei_TREU927 | product=hypothetical protein, conserved | location=Tb927_11_01_v4:728423-729316(-) | length=297	1	14	Tb11.02.0140	hypothetical protein, conserved	14	60.9	33.848	297	0.58325	22.369	-0.777814
>GeneDB|Tb927.10.11700 | organism=Trypanosoma_brucei_TREU927 | product=guanylate kinase, putative | location=Tb927_10_v5:2859201-2859737(+) | length=178	1	6	Tb927.10.11700	guanylate kinase, putative	6	27	20.106	178	0.58343	29.921	-0.777369
>GeneDB|Tb11.01.0420 | organism=Trypanosoma_brucei_TREU927 | product=protein transport protein Sec13, putative | location=Tb927_11_01_v4:2215917-2216900(+) | length=327	1	6	Tb11.01.0420	protein transport protein Sec13, putative	6	28.7	35.125	327	0.58407	17.802	-0.775787
>GeneDB|Tb927.3.3690 | organism=Trypanosoma_brucei_TREU927 | product=flagellar radial spoke protein-like, putative | location=Tb927_03_v4:1030636-1032282(+) | length=548	1	21	Tb927.3.3690	flagellar radial spoke protein-like, putative	21	56.4	60.992	548	0.58456	18.517	-0.774577
>GeneDB|Tb11.01.4230 | organism=Trypanosoma_brucei_TREU927 | product=protein kinase, putative | location=Tb927_11_01_v4:3248188-3249585(+) | length=465	1	3	Tb11.01.4230	protein kinase, putative	3	10.3	53.169	465	0.58512	21.782	-0.773196
>GeneDB|Tb927.3.4190 | organism=Trypanosoma_brucei_TREU927 | product=endosomal integral membrane protein, putative | location=Tb927_03_v4:1176275-1178212(-) | length=645	1	10	Tb927.3.4190	endosomal integral membrane protein, putative	10	23.4	72.048	645	0.5861	37.523	-0.770781
>GeneDB|Tb11.02.2640 | organism=Trypanosoma_brucei_TREU927 | product=dynein intermediate chain IC78, putative | location=Tb927_11_01_v4:1401276-1403243(+) | length=655	1	27	Tb11.02.2640	dynein intermediate chain IC78, putative	27	48.4	73.293	655	0.58636	19.366	-0.770141
>GeneDB|Tb927.10.650 | organism=Trypanosoma_brucei_TREU927 | product=TAX-2,flagellar protein | location=Tb927_10_v5:173390-174052(+) | length=220	1	6	Tb927.10.650	TAX-2,flagellar protein	6	33.2	25.588	220	0.58692	54.052	-0.768764
>GeneDB|Tb11.02.5250 | organism=Trypanosoma_brucei_TREU927 | product=histone H2B variant, putative | location=Tb927_11_01_v4:2047276-2047707(+) | length=143	1	7	Tb11.02.5250	histone H2B variant, putative	7	43.4	15.786	143	0.58805	20.551	-0.765989
>GeneDB|Tb11.01.0510 | organism=Trypanosoma_brucei_TREU927 | product=hypothetical protein, conserved | location=Tb927_11_01_v4:2199088-2200341(+) | length=417	1	6	Tb11.01.0510	hypothetical protein, conserved	6	21.1	46.474	417	0.58838	92.3	-0.76518
>GeneDB|Tb927.8.7490 | organism=Trypanosoma_brucei_TREU927 | product=hypothetical protein, conserved | location=Tb927_08_v4:2157670-2162007(+) | length=1445	1	3	Tb927.8.7490	hypothetical protein, conserved	3	2.8	157.97	1445	0.5885	13.858	-0.764886
>GeneDB|Tb927.7.5660 | organism=Trypanosoma_brucei_TREU927 | product=hypothetical protein, conserved | location=Tb927_07_v4:1530317-1532044(+) | length=575	1	24	Tb927.7.5660	hypothetical protein, conserved	24	47.5	65.139	575	0.58875	28.708	-0.764273
>GeneDB|Tb11.01.6040 | organism=Trypanosoma_brucei_TREU927 | product=hypothetical protein, conserved | location=Tb927_11_01_v4:3778486-3780954(+) | length=822	1	3	Tb11.01.6040	hypothetical protein, conserved	3	6	94.413	822	0.58894	29.815	-0.763807
>GeneDB|Tb927.2.3020 | organism=Trypanosoma_brucei_TREU927 | product=hypothetical protein, conserved | location=Tb927_02_v4:571241-574339(+) | length=1032	1	7	Tb927.2.3020	hypothetical protein, conserved	7	8.3	118.83	1032	0.58972	59.312	-0.761898
>GeneDB|Tb11.01.1780 | organism=Trypanosoma_brucei_TREU927 | product=short-chain dehydrogenase, putative | location=Tb927_11_01_v4:2642884-2643825(+) | length=313	1	4	Tb11.01.1780	short-chain dehydrogenase, putative	4	17.3	33.958	313	0.58975	13.792	-0.761825
>GeneDB|Tb11.01.2470 | organism=Trypanosoma_brucei_TREU927 | product=hypothetical protein, conserved | location=Tb927_11_01_v4:2806213-2807001(+) | length=262	1	3	Tb11.01.2470	hypothetical protein, conserved	3	18.7	29.716	262	0.58981	8.4633	-0.761678
>GeneDB|Tb927.7.4910 | organism=Trypanosoma_brucei_TREU927 | product=hypothetical protein, conserved | location=Tb927_07_v4:1294974-1296083(-) | length=369	1	21	Tb927.7.4910	hypothetical protein, conserved	21	63.1	40.483	369	0.59018	20.924	-0.760773
>GeneDB|Tb09.211.0775 | organism=Trypanosoma_brucei_TREU927 | product=hypothetical protein, conserved | location=Tb927_09_v4:1402672-1402926(-) | length=84;REV__>GeneDB|Tb927.5.410 | organism=Trypanosoma_brucei_TREU927 | product=hypothetical protein | location=Tb927_05_v4:129279-130460(-) | length=393	2	8;1	Tb09.211.0775	hypothetical protein, conserved	8	78.6	9.5887	84	0.59059	27.622	-0.759771
>GeneDB|Tb927.10.5990 | organism=Trypanosoma_brucei_TREU927 | product=hypothetical protein, conserved | location=Tb927_10_v5:1503675-1505006(-) | length=443	1	4	Tb927.10.5990	hypothetical protein, conserved	4	14.4	50.768	443	0.59074	36.775	-0.759405
>GeneDB|Tb927.3.5010 | organism=Trypanosoma_brucei_TREU927 | product=hypothetical protein, conserved | location=Tb927_03_v4:1406292-1406873(+) | length=193	1	17	Tb927.3.5010	hypothetical protein, conserved	17	57	23.423	193	0.5912	36.89	-0.758282
>GeneDB|Tb11.01.4340 | organism=Trypanosoma_brucei_TREU927 | product=hypothetical protein, conserved | location=Tb927_11_01_v4:3285063-3286118(+) | length=351	1	5	Tb11.01.4340	hypothetical protein, conserved	5	15.4	38.051	351	0.5919	22.619	-0.756575
>GeneDB|Tb927.4.1150 | organism=Trypanosoma_brucei_TREU927 | product=hypothetical protein, conserved | location=Tb927_04_v4:302452-304677(-) | length=741	1	3	Tb927.4.1150	hypothetical protein, conserved	3	6.7	83.151	741	0.59272	15.541	-0.754577
>GeneDB|Tb927.8.3660 | organism=Trypanosoma_brucei_TREU927 | product=protein transport protein Sec23 | location=Tb927_08_v4:1096372-1099281(-) | length=969	1	10	Tb927.8.3660	protein transport protein Sec23	10	17.5	106.63	969	0.5931	38.045	-0.753653
>GeneDB|Tb927.10.15580 | organism=Trypanosoma_brucei_TREU927 | product=dynein light chain, putative | location=Tb927_10_v5:3823866-3824258(+) | length=130	1	2	Tb927.10.15580	dynein light chain, putative	2	34.6	14.624	130	0.59317	41.08	-0.753482
>GeneDB|Tb11.02.2060 | organism=Trypanosoma_brucei_TREU927 | product=radial spoke protein RSP4/6, putative | location=Tb927_11_01_v4:1272964-1274721(+) | length=585;REV__>GeneDB|Tb927.6.2690 | organism=Trypanosoma_brucei_TREU927 | product=ubiquitin carboxyl-terminal hydrolase, putative,cysteine peptidase, Clan CA, family C19, putative | location=Tb927_06_v4:807824-809743(+) | length=639;REV__>REV…	3	20;1;1	Tb11.02.2060	radial spoke protein RSP4/6, putative	20	47.4	66.905	585	0.59378	15.676	-0.752
>GeneDB|Tb11.01.0160 | organism=Trypanosoma_brucei_TREU927 | product=hypothetical protein, conserved | location=Tb927_11_01_v4:2293767-2295032(+) | length=421	1	2	Tb11.01.0160	hypothetical protein, conserved	2	5.5	49.027	421	0.59398	9.6746	-0.751514
>GeneDB|Tb11.52.0010 | organism=Trypanosoma_brucei_TREU927 | product=hypothetical protein, conserved | location=Tb927_11_01_v4:3401871-3403163(-) | length=430	1	2	Tb11.52.0010	hypothetical protein, conserved	2	7	47.225	430	0.59474	14.284	-0.749669
>GeneDB|Tb927.7.5700 | organism=Trypanosoma_brucei_TREU927 | product=hypothetical protein, conserved | location=Tb927_07_v4:1540221-1541438(+) | length=405	1	7	Tb927.7.5700	hypothetical protein, conserved	7	20.2	45.55	405	0.59489	28.38	-0.749305
>GeneDB|Tb09.160.5250 | organism=Trypanosoma_brucei_TREU927 | product=adenosine monophosphate deaminase, putative,AMP deaminase, putative | location=Tb927_09_v4:1112335-1117407(+) | length=1690	1	14	Tb09.160.5250	adenosine monophosphate deaminase, putative,AMP deaminase, putative	14	12.7	189.71	1690	0.5955	47.505	-0.747827
>GeneDB|Tb927.10.3820 | organism=Trypanosoma_brucei_TREU927 | product=hypothetical protein, conserved | location=Tb927_10_v5:1004298-1010741(-) | length=2147	1	3	Tb927.10.3820	hypothetical protein, conserved	3	2.7	233.13	2147	0.59561	34.393	-0.74756
>GeneDB|Tb11.02.2490 | organism=Trypanosoma_brucei_TREU927 | product=hypothetical protein, conserved | location=Tb927_11_01_v4:1372878-1373702(+) | length=274	1	8	Tb11.02.2490	hypothetical protein, conserved	8	36.9	30.214	274	0.59574	39.632	-0.747245
>GeneDB|Tb11.01.8590 | organism=Trypanosoma_brucei_TREU927 | product=Rab-like 5, small G protein | location=Tb927_11_01_v4:4424849-4425508(-) | length=219	1	13	Tb11.01.8590	Rab-like 5, small G protein	13	68	24.466	219	0.59588	46.044	-0.746906
>GeneDB|Tb927.10.7880 | organism=Trypanosoma_brucei_TREU927 | product=hypothetical protein, conserved | location=Tb927_10_v5:1968304-1970259(-) | length=651;REV__>REV_GeneDB|Tb927.1.370 Reverse sequence, was | organism=Trypanosoma_brucei_TREU927 | product=leucine-rich repeat protein (LRRP), putative | location=Tb927_01_v4:140214-144560(-) | length=1448;REV__>REV_GeneDB|Tb927.6.130 Reverse sequenc…	15	7;0;0;0;0;0;0;0;0;0;0;0;0;0;0	Tb927.10.7880	hypothetical protein, conserved	7	12.1	76.814	651	0.59634	29.888	-0.745793
>GeneDB|Tb11.01.1625 | organism=Trypanosoma_brucei_TREU927 | product=hypothetical protein, conserved | location=Tb927_11_01_v4:2608692-2609003(+) | length=103	1	8	Tb11.01.1625	hypothetical protein, conserved	8	94.2	11.865	103	0.5966	32.746	-0.745164
>GeneDB|Tb927.3.980 | organism=Trypanosoma_brucei_TREU927 | product=hypothetical protein, conserved | location=Tb927_03_v4:240544-242646(+) | length=700	1	10	Tb927.3.980	hypothetical protein, conserved	10	18.4	78.463	700	0.59691	17.001	-0.744415
>GeneDB|Tb11.47.0006 | organism=Trypanosoma_brucei_TREU927 | product=hypothetical protein, conserved | location=Tb927_11_01_v4:414757-417015(+) | length=752	1	52	Tb11.47.0006	hypothetical protein, conserved	52	73.8	86.855	752	0.59819	21.143	-0.741324
>GeneDB|Tb927.4.1040 | organism=Trypanosoma_brucei_TREU927 | product=hypothetical protein, conserved | location=Tb927_04_v4:280275-280775(-) | length=166	1	3	Tb927.4.1040	hypothetical protein, conserved	3	18.7	19.37	166	0.59822	33.798	-0.741252
>GeneDB|Tb09.160.5670 | organism=Trypanosoma_brucei_TREU927 | product=hypothetical protein, conserved,predicted tetratricopeptide repeat protein | location=Tb927_09_v4:1214042-1218130(-) | length=1351;REV__>GeneDB|Tb11.57.0023 | organism=Trypanosoma_brucei_TREU927 | product=variant surface glycoprotein (VSG, pseudogene), putative,variant surface glycoprotein (VSG), degenerate | location=Tb927_11_…	2	63;1	Tb09.160.5670	hypothetical protein, conserved,predicted tetratricopeptide repeat protein	63	56.6	151.63	1351	0.59823	26.648	-0.741228
>GeneDB|Tb927.10.8930 | organism=Trypanosoma_brucei_TREU927 | product=paraflagellar rod component, putative | location=Tb927_10_v5:2215938-2218070(+) | length=710	1	24	Tb927.10.8930	paraflagellar rod component, putative	24	40	80.014	710	0.59918	25.72	-0.738939
>GeneDB|Tb09.160.4620 | organism=Trypanosoma_brucei_TREU927 | product=inositol-1(or 4)-monophosphatase, putative | location=Tb927_09_v4:989868-990962(+) | length=364	1	5	Tb09.160.4620	inositol-1(or 4)-monophosphatase, putative	5	24.7	39.976	364	0.59969	20.231	-0.737711
>GeneDB|Tb927.10.10370 | organism=Trypanosoma_brucei_TREU927 | product=hypothetical protein, conserved | location=Tb927_10_v5:2558861-2559409(-) | length=182;>GeneDB|Tb927.10.10290 | organism=Trypanosoma_brucei_TREU927 | product=hypothetical protein, conserved | location=Tb927_10_v5:2532117-2532665(-) | length=182	2	6;5	Tb927.10.10370	hypothetical protein, conserved	6	56.6	20.152	182	0.59969	22.465	-0.737711
>GeneDB|Tb927.5.1580 | organism=Trypanosoma_brucei_TREU927 | product=hypothetical protein, conserved,zinc finger protein family member, putative | location=Tb927_05_v4:496641-498341(-) | length=566	1	3	Tb927.5.1580	hypothetical protein, conserved,zinc finger protein family member, putative	3	5.8	60.305	566	0.60001	15.9	-0.736942
>GeneDB|Tb927.2.4050 | organism=Trypanosoma_brucei_TREU927 | product=hypothetical protein, conserved | location=Tb927_02_v4:710931-714647(-) | length=1238	1	9	Tb927.2.4050	hypothetical protein, conserved	9	12.3	128.98	1238	0.60115	39.223	-0.734203
>GeneDB|Tb11.01.1880 | organism=Trypanosoma_brucei_TREU927 | product=hypothetical protein, conserved | location=Tb927_11_01_v4:2656530-2659127(+) | length=865	1	2	Tb11.01.1880	hypothetical protein, conserved	2	2.3	99.394	865	0.60121	12.884	-0.734059
>GeneDB|Tb927.10.14500 | organism=Trypanosoma_brucei_TREU927 | product=hypothetical protein, conserved | location=Tb927_10_v5:3545522-3546535(-) | length=337	1	19	Tb927.10.14500	hypothetical protein, conserved	19	60.8	37.027	337	0.60192	36.632	-0.732356
>GeneDB|Tb927.2.6050 | organism=Trypanosoma_brucei_TREU927 | product=beta prime COP protein | location=Tb927_02_v4:1092946-1095501(+) | length=851	1	29	Tb927.2.6050	beta prime COP protein	29	47.1	94.051	851	0.60231	29.933	-0.731422
>GeneDB|Tb927.8.4400 | organism=Trypanosoma_brucei_TREU927 | product=hypothetical protein, conserved | location=Tb927_08_v4:1309538-1311544(-) | length=668;REV__>REV_GeneDB|Tb927.3.2900 Reverse sequence, was | organism=Trypanosoma_brucei_TREU927 | product=elongation initiation factor 2 alpha subunit, putative | location=Tb927_03_v4:746935-748191(-) | length=418	2	25;0	Tb927.8.4400	hypothetical protein, conserved	25	44.6	75.932	668	0.60262	23.098	-0.73068
>GeneDB|Tb927.3.5530 | organism=Trypanosoma_brucei_TREU927 | product=Tb-292 membrane associated protein | location=Tb927_03_v4:1547572-1554963(+) | length=2463	1	39	Tb927.3.5530	Tb-292 membrane associated protein	39	22.9	279.19	2463	0.603	29.311	-0.72977
>GeneDB|Tb927.7.6290 | organism=Trypanosoma_brucei_TREU927 | product=kinesin, putative | location=Tb927_07_v4:1703481-1706156(-) | length=891	1	19	Tb927.7.6290	kinesin, putative	19	29.3	96.951	891	0.60301	46.876	-0.729746
>GeneDB|Tb927.8.5020 | organism=Trypanosoma_brucei_TREU927 | product=hypothetical protein, conserved | location=Tb927_08_v4:1486247-1487578(+) | length=443	1	3	Tb927.8.5020	hypothetical protein, conserved	3	12.9	50.566	443	0.60323	13.352	-0.72922
>GeneDB|Tb927.10.12030 | organism=Trypanosoma_brucei_TREU927 | product=hypothetical protein, conserved | location=Tb927_10_v5:2923512-2924264(+) | length=250	1	6	Tb927.10.12030	hypothetical protein, conserved	6	32.8	27.19	250	0.60439	16.835	-0.726448
>GeneDB|Tb927.10.970 | organism=Trypanosoma_brucei_TREU927 | product=hypothetical protein, conserved | location=Tb927_10_v5:262544-267814(+) | length=1756	1	4	Tb927.10.970	hypothetical protein, conserved	4	4.3	203.6	1756	0.60485	35.216	-0.725351
>GeneDB|Tb927.7.5050 | organism=Trypanosoma_brucei_TREU927 | product=hypothetical protein, conserved | location=Tb927_07_v4:1331171-1334092(+) | length=973	1	8	Tb927.7.5050	hypothetical protein, conserved	8	11.5	105.21	973	0.605	23.036	-0.724993
>GeneDB|Tb927.10.7350 | organism=Trypanosoma_brucei_TREU927 | product=hypothetical protein, conserved | location=Tb927_10_v5:1852143-1857527(-) | length=1794	1	7	Tb927.10.7350	hypothetical protein, conserved	7	9.1	197.82	1794	0.60542	23.966	-0.723992
>GeneDB|Tb927.5.3190 | organism=Trypanosoma_brucei_TREU927 | product=hypothetical protein, conserved | location=Tb927_05_v4:994821-995447(-) | length=208	1	2	Tb927.5.3190	hypothetical protein, conserved	2	13.5	23.192	208	0.60544	15.233	-0.723944
>GeneDB|Tb927.7.2240 | organism=Trypanosoma_brucei_TREU927 | product=hypothetical protein, conserved | location=Tb927_07_v4:579214-580848(-) | length=544	1	17	Tb927.7.2240	hypothetical protein, conserved	17	39.3	59.665	544	0.60599	18.13	-0.722634
>GeneDB|Tb927.10.11800 | organism=Trypanosoma_brucei_TREU927 | product=33 kDa inner dynein arm light chain, axonemal, putative,dynein light chain, putative | location=Tb927_10_v5:2883245-2884366(+) | length=373	1	6	Tb927.10.11800	33 kDa inner dynein arm light chain, axonemal, putative,dynein light chain, putative	6	23.3	42.092	373	0.60699	41.536	-0.720255
>GeneDB|Tb927.4.460 | organism=Trypanosoma_brucei_TREU927 | product=Alkylated DNA repair protein (alkB homolog), putative | location=Tb927_04_v4:136144-137115(-) | length=323	1	2	Tb927.4.460	Alkylated DNA repair protein (alkB homolog), putative	2	8.7	37.656	323	0.60738	40.602	-0.719329
>GeneDB|Tb927.8.7420 | organism=Trypanosoma_brucei_TREU927 | product=hypothetical protein, conserved | location=Tb927_08_v4:2137644-2140223(+) | length=859	1	2	Tb927.8.7420	hypothetical protein, conserved	2	1.6	96.391	859	0.60756	3.6689	-0.718901
>GeneDB|Tb11.03.0250 | organism=Trypanosoma_brucei_TREU927 | product=cyclophilin a,cyclophilin type peptidyl-prolyl cis-trans isomerase | location=Tb927_11_01_v4:224513-225046(+) | length=177	1	15	Tb11.03.0250	cyclophilin a,cyclophilin type peptidyl-prolyl cis-trans isomerase	15	88.1	18.717	177	0.60773	27.915	-0.718498
>GeneDB|Tb11.01.6670 | organism=Trypanosoma_brucei_TREU927 | product=small GTPase | location=Tb927_11_01_v4:3939495-3940094(-) | length=199	1	3	Tb11.01.6670	small GTPase	3	17.6	22.782	199	0.60819	21.582	-0.717406
>GeneDB|Tb927.3.1060 | organism=Trypanosoma_brucei_TREU927 | product=hypothetical protein, conserved (pseudogene),hypothetical protein, conserved, interrupted | location=Tb927_03_v4:262387-263532(+) | length=381	1	12	Tb927.3.1060	hypothetical protein, conserved (pseudogene),hypothetical protein, conserved, interrupted	12	34.1	43.823	381	0.60843	17.267	-0.716837
>GeneDB|Tb927.7.7240 | organism=Trypanosoma_brucei_TREU927 | product=hypothetical protein, conserved,leucine-rich repeat protein (LRRP), putative | location=Tb927_07_v4:2085710-2087863(-) | length=717	1	4	Tb927.7.7240	hypothetical protein, conserved,leucine-rich repeat protein (LRRP), putative	4	9.5	78.688	717	0.60958	23.289	-0.714113
>GeneDB|Tb927.4.2080 | organism=Trypanosoma_brucei_TREU927 | product=hypothetical protein, conserved | location=Tb927_04_v4:532658-535378(-) | length=906	1	58	Tb927.4.2080	hypothetical protein, conserved	58	60.5	104.88	906	0.60964	31.222	-0.713971
>GeneDB|Tb927.8.6870 | organism=Trypanosoma_brucei_TREU927 | product=hypothetical protein, conserved | location=Tb927_08_v4:1986203-1988713(-) | length=836	1	3	Tb927.8.6870	hypothetical protein, conserved	3	5.3	95.601	836	0.60965	22.997	-0.713947
>GeneDB|Tb11.02.5800 | organism=Trypanosoma_brucei_TREU927 | product=calmodulin, putative | location=Tb927_11_01_v4:2180875-2181339(-) | length=154	1	3	Tb11.02.5800	calmodulin, putative	3	22.1	17.786	154	0.6101	36.21	-0.712882
>GeneDB|Tb09.160.5300 | organism=Trypanosoma_brucei_TREU927 | product=ADP-ribosylation factor-like protein, putative | location=Tb927_09_v4:1123782-1124363(+) | length=193	1	1	Tb09.160.5300	ADP-ribosylation factor-like protein, putative	1	7.8	21.093	193	0.61034	21.187	-0.712315
>GeneDB|Tb927.7.6900 | organism=Trypanosoma_brucei_TREU927 | product=double-strand-break repair protein rad21 homolog, putative | location=Tb927_07_v4:1965053-1966807(-) | length=584	1	6	Tb927.7.6900	double-strand-break repair protein rad21 homolog, putative	6	15.1	63.033	584	0.61052	179.01	-0.71189
>GeneDB|Tb11.02.0170 | organism=Trypanosoma_brucei_TREU927 | product=hypothetical protein, conserved | location=Tb927_11_01_v4:734150-735871(-) | length=573	1	20	Tb11.02.0170	hypothetical protein, conserved	20	46.1	63.115	573	0.61052	28.155	-0.71189
>GeneDB|Tb927.5.1900 | organism=Trypanosoma_brucei_TREU927 | product=hypothetical protein, conserved | location=Tb927_05_v4:589028-591076(+) | length=682	1	14	Tb927.5.1900	hypothetical protein, conserved	14	26.4	77.365	682	0.61063	65.87	-0.71163
>GeneDB|Tb927.10.6350 | organism=Trypanosoma_brucei_TREU927 | product=trypanin | location=Tb927_10_v5:1608699-1610060(-) | length=453	1	7	Tb927.10.6350	trypanin	7	18.3	53.923	453	0.61103	18.327	-0.710685
>GeneDB|Tb927.8.5250 | organism=Trypanosoma_brucei_TREU927 | product=coatomer delta subunit, putative,delta-COP, putative,delta-coat protein, putative | location=Tb927_08_v4:1569226-1570821(+) | length=531;>REV_GeneDB|Tb09.211.3890 Reverse sequence, was | organism=Trypanosoma_brucei_TREU927 | product=hypothetical protein, conserved | location=Tb927_09_v4:1998911-2002756(+) | length=1281	2	22;1	Tb927.8.5250	coatomer delta subunit, putative,delta-COP, putative,delta-coat protein, putative	22	54.8	57.33	531	0.61158	25.381	-0.709387
>GeneDB|Tb927.10.14040 | organism=Trypanosoma_brucei_TREU927 | product=vacuolar ATP synthase subunit c, putative | location=Tb927_10_v5:3419254-3420396(-) | length=380	1	14	Tb927.10.14040	vacuolar ATP synthase subunit c, putative	14	50.8	43.414	380	0.61175	24.215	-0.708986
>GeneDB|Tb927.10.7200 | organism=Trypanosoma_brucei_TREU927 | product=hypothetical protein, conserved | location=Tb927_10_v5:1810710-1813250(-) | length=846	1	10	Tb927.10.7200	hypothetical protein, conserved	10	14.3	93.195	846	0.61245	37.691	-0.707336
>GeneDB|Tb927.8.4910 | organism=Trypanosoma_brucei_TREU927 | product=hypothetical protein, conserved | location=Tb927_08_v4:1455685-1456029(+) | length=114;>REV_GeneDB|Tb927.7.2050 Reverse sequence, was | organism=Trypanosoma_brucei_TREU927 | product=hypothetical protein, conserved | location=Tb927_07_v4:515353-517776(-) | length=807;REV__>REV_GeneDB|Tb927.10.12270 Reverse sequence, was | organis…	4	4;1;1;1	Tb927.8.4910	hypothetical protein, conserved	4	43	13.123	114	0.61412	27.667	-0.703408
>GeneDB|Tb927.8.4640 | organism=Trypanosoma_brucei_TREU927 | product=flagellar protofilament ribbon protein, putative | location=Tb927_08_v4:1366728-1367885(-) | length=385	1	17	Tb927.8.4640	flagellar protofilament ribbon protein, putative	17	48.1	46.865	385	0.61481	16.848	-0.701787
>GeneDB|Tb11.01.2390 | organism=Trypanosoma_brucei_TREU927 | product=hypothetical protein, conserved | location=Tb927_11_01_v4:2775279-2775854(+) | length=191	1	7	Tb11.01.2390	hypothetical protein, conserved	7	38.7	22.449	191	0.61733	16.265	-0.695886
>GeneDB|Tb927.10.14510 | organism=Trypanosoma_brucei_TREU927 | product=hypothetical protein, conserved | location=Tb927_10_v5:3547265-3549829(-) | length=854	1	20	Tb927.10.14510	hypothetical protein, conserved	20	34.9	95.105	854	0.61751	30.925	-0.695466
>GeneDB|Tb11.52.0004 | organism=Trypanosoma_brucei_TREU927 | product=hypothetical protein, conserved | location=Tb927_11_01_v4:3383614-3384522(-) | length=302	1	5	Tb11.52.0004	hypothetical protein, conserved	5	15.2	35.114	302	0.61822	17.523	-0.693808
>GeneDB|Tb11.02.3350 | organism=Trypanosoma_brucei_TREU927 | product=hypothetical protein, conserved | location=Tb927_11_01_v4:1568974-1571847(+) | length=924	1	2	Tb11.02.3350	hypothetical protein, conserved	2	3.9	102.77	924	0.61936	20.46	-0.69115
>GeneDB|Tb927.7.3920 | organism=Trypanosoma_brucei_TREU927 | product=hypothetical protein, conserved | location=Tb927_07_v4:1024201-1025163(+) | length=320	1	7	Tb927.7.3920	hypothetical protein, conserved	7	40.3	36.085	320	0.61995	24.268	-0.689776
>GeneDB|Tb927.10.12630 | organism=Trypanosoma_brucei_TREU927 | product=hypothetical protein, conserved | location=Tb927_10_v5:3061603-3062259(-) | length=218	1	3	Tb927.10.12630	hypothetical protein, conserved	3	13.3	25.138	218	0.62025	39.985	-0.689078
>GeneDB|Tb927.10.1830 | organism=Trypanosoma_brucei_TREU927 | product=syntaxin, putative | location=Tb927_10_v5:480135-480827(+) | length=230	1	6	Tb927.10.1830	syntaxin, putative	6	39.1	25.824	230	0.62045	32.875	-0.688613
>GeneDB|Tb09.160.0790 | organism=Trypanosoma_brucei_TREU927 | product=hypothetical protein, conserved | location=Tb927_09_v4:438677-440791(-) | length=692	1	10	Tb09.160.0790	hypothetical protein, conserved	10	22.8	77.186	692	0.62062	28.382	-0.688218
>GeneDB|Tb927.10.12410 | organism=Trypanosoma_brucei_TREU927 | product=hypothetical protein, conserved | location=Tb927_10_v5:3009094-3009780(-) | length=228	1	11	Tb927.10.12410	hypothetical protein, conserved	11	76.8	24.659	228	0.62065	27.692	-0.688148
>GeneDB|Tb927.10.13710 | organism=Trypanosoma_brucei_TREU927 | product=hypothetical protein, conserved | location=Tb927_10_v5:3350011-3351006(-) | length=331	1	12	Tb927.10.13710	hypothetical protein, conserved	12	36	37.612	331	0.62195	21.682	-0.685129
>GeneDB|Tb927.8.4220 | organism=Trypanosoma_brucei_TREU927 | product=hypothetical protein, conserved | location=Tb927_08_v4:1251306-1251983(-) | length=225	1	9	Tb927.8.4220	hypothetical protein, conserved	9	39.1	25.995	225	0.62275	25.995	-0.683275
>GeneDB|Tb927.5.4150 | organism=Trypanosoma_brucei_TREU927 | product=hypothetical protein, conserved | location=Tb927_05_v4:1268250-1269410(-) | length=386	1	13	Tb927.5.4150	hypothetical protein, conserved	13	50.5	42.589	386	0.6231	33.7	-0.682464
>GeneDB|Tb11.01.7750 | organism=Trypanosoma_brucei_TREU927 | product=outer dynein arm docking complex, putative;with=GeneDB:Linj32_V3.3050 | location=Tb927_11_01_v4:4199041-4200945(-) | length=634	1	18	Tb11.01.7750	outer dynein arm docking complex, putative;with=GeneDB:Linj32_V3.3050	18	35	72.145	634	0.62321	31.666	-0.68221
>GeneDB|Tb927.7.2260 | organism=Trypanosoma_brucei_TREU927 | product=hypothetical protein, conserved | location=Tb927_07_v4:584742-585581(-) | length=279	1	9	Tb927.7.2260	hypothetical protein, conserved	9	47	30.059	279	0.62363	30.896	-0.681238
>GeneDB|Tb927.7.4060 | organism=Trypanosoma_brucei_TREU927 | product=calpain-like cysteine peptidase, putative,cysteine peptidase, Clan CA, family C2, putative | location=Tb927_07_v4:1075298-1075645(+) | length=115	1	5	Tb927.7.4060	calpain-like cysteine peptidase, putative,cysteine peptidase, Clan CA, family C2, putative	5	44.3	12.873	115	0.62378	43.333	-0.680891
>GeneDB|Tb927.2.4330 | organism=Trypanosoma_brucei_TREU927 | product=PFR5 | location=Tb927_02_v4:765284-767572(-) | length=762	1	23	Tb927.2.4330	PFR5	23	35.6	87.142	762	0.62399	42.047	-0.680405
>GeneDB|Tb927.3.3040 | organism=Trypanosoma_brucei_TREU927 | product=hypothetical protein, conserved | location=Tb927_03_v4:777612-778415(-) | length=267	1	11	Tb927.3.3040	hypothetical protein, conserved	11	54.7	28.762	267	0.62527	42.057	-0.677449
>GeneDB|Tb09.160.0720 | organism=Trypanosoma_brucei_TREU927 | product=hypothetical protein, conserved | location=Tb927_09_v4:418850-420559(-) | length=569	1	10	Tb09.160.0720	hypothetical protein, conserved	10	30.8	63.117	569	0.62558	28.325	-0.676734
>GeneDB|Tb927.7.5920 | organism=Trypanosoma_brucei_TREU927 | product=mercaptopyruvate sulfurtransferase, putative | location=Tb927_07_v4:1588516-1589640(+) | length=374	1	1	Tb927.7.5920	mercaptopyruvate sulfurtransferase, putative	1	4.3	41.971	374	0.62617	20.71	-0.675374
>GeneDB|Tb11.02.3200 | organism=Trypanosoma_brucei_TREU927 | product=dynein light chain p28, axonemal, putative | location=Tb927_11_01_v4:1541626-1542333(+) | length=235	1	13	Tb11.02.3200	dynein light chain p28, axonemal, putative	13	48.1	27.371	235	0.62785	39.467	-0.671508
>GeneDB|Tb927.6.4760 | organism=Trypanosoma_brucei_TREU927 | product=hypothetical protein, conserved | location=Tb927_06_v4:1324623-1327007(+) | length=794	1	17	Tb927.6.4760	hypothetical protein, conserved	17	26.8	89.074	794	0.62877	15.042	-0.669396
>GeneDB|Tb927.8.1560 | organism=Trypanosoma_brucei_TREU927 | product=hypothetical protein, conserved | location=Tb927_08_v4:508257-510107(+) | length=616	1	7	Tb927.8.1560	hypothetical protein, conserved	7	17.4	69.483	616	0.62979	27.762	-0.667057
>GeneDB|Tb927.10.3310 | organism=Trypanosoma_brucei_TREU927 | product=hypothetical protein, conserved | location=Tb927_10_v5:852096-854936(+) | length=946	1	8	Tb927.10.3310	hypothetical protein, conserved	8	11.5	110.24	946	0.62986	23.718	-0.666897
>GeneDB|Tb09.211.0620 | organism=Trypanosoma_brucei_TREU927 | product=actin A | location=Tb927_09_v4:1374609-1375739(-) | length=376;>GeneDB|Tb09.211.0630 | organism=Trypanosoma_brucei_TREU927 | product=actin A | location=Tb927_09_v4:1377053-1378183(-) | length=376	2	29;29	Tb09.211.0620	actin A	29	75.8	41.895	376	0.63057	25.518	-0.665272
>GeneDB|Tb11.18.0005 | organism=Trypanosoma_brucei_TREU927 | product=hypothetical protein, conserved | location=Tb927_11_01_v4:617575-618300(+) | length=241	1	9	Tb11.18.0005	hypothetical protein, conserved	9	36.1	26.94	241	0.6309	17.197	-0.664517
>GeneDB|Tb927.10.8600 | organism=Trypanosoma_brucei_TREU927 | product=hypothetical protein, conserved | location=Tb927_10_v5:2130956-2134225(+) | length=1089	1	3	Tb927.10.8600	hypothetical protein, conserved	3	3.6	119.84	1089	0.63123	13.265	-0.663762
>GeneDB|Tb927.3.3760 | organism=Trypanosoma_brucei_TREU927 | product=tryparedoxin | location=Tb927_03_v4:1050464-1050898(+) | length=144;>GeneDB|Tb927.3.3780 | organism=Trypanosoma_brucei_TREU927 | product=tryparedoxin | location=Tb927_03_v4:1053583-1054017(+) | length=144	2	10;10	Tb927.3.3760	tryparedoxin	10	85.4	15.921	144	0.63205	26.752	-0.661889
>GeneDB|Tb927.8.3590 | organism=Trypanosoma_brucei_TREU927 | product=hypothetical protein, conserved | location=Tb927_08_v4:1079246-1081204(-) | length=652	1	2	Tb927.8.3590	hypothetical protein, conserved	2	3.7	72.24	652	0.63233	47.247	-0.66125
>GeneDB|Tb11.02.2690 | organism=Trypanosoma_brucei_TREU927 | product=hypothetical protein, conserved,leucine-rich repeat protein (LRRP), putative | location=Tb927_11_01_v4:1414779-1416101(+) | length=440	1	5	Tb11.02.2690	hypothetical protein, conserved,leucine-rich repeat protein (LRRP), putative	5	20.9	48.562	440	0.63233	36.73	-0.66125
>GeneDB|Tb927.5.3600 | organism=Trypanosoma_brucei_TREU927 | product=ATP-dependent DEAD/H RNA helicase, putative | location=Tb927_05_v4:1125193-1128039(+) | length=948	1	5	Tb927.5.3600	ATP-dependent DEAD/H RNA helicase, putative	5	6.6	103.62	948	0.6329	29.292	-0.659951
>GeneDB|Tb927.5.2950 | organism=Trypanosoma_brucei_TREU927 | product=hypothetical protein, conserved | location=Tb927_05_v4:929331-931670(+) | length=779	1	29	Tb927.5.2950	hypothetical protein, conserved	29	46.5	88.256	779	0.63338	18.776	-0.658857
>GeneDB|Tb11.02.1380 | organism=Trypanosoma_brucei_TREU927 | product=actin, putative | location=Tb927_11_01_v4:1117425-1118726(+) | length=433	1	5	Tb11.02.1380	actin, putative	5	16.4	47.559	433	0.63348	30.267	-0.658629
>GeneDB|Tb927.3.5060 | organism=Trypanosoma_brucei_TREU927 | product=hypothetical protein, conserved | location=Tb927_03_v4:1419145-1420188(+) | length=347	1	13	Tb927.3.5060	hypothetical protein, conserved	13	41.5	39.126	347	0.63349	25.819	-0.658606
>GeneDB|Tb927.10.10140 | organism=Trypanosoma_brucei_TREU927 | product=paraflagellar rod component, putative | location=Tb927_10_v5:2497066-2498061(+) | length=331	1	20	Tb927.10.10140	paraflagellar rod component, putative	20	76.4	37.014	331	0.63382	26.223	-0.657855
>GeneDB|Tb09.211.0850 | organism=Trypanosoma_brucei_TREU927 | product=hypothetical protein, conserved | location=Tb927_09_v4:1414005-1416125(-) | length=706	1	1	Tb09.211.0850	hypothetical protein, conserved	1	3.3	79.207	706	0.63391	13.883	-0.65765
>GeneDB|Tb927.7.2510 | organism=Trypanosoma_brucei_TREU927 | product=endoplasmatic reticulum retrieval protein, putative | location=Tb927_07_v4:645631-646179(-) | length=182	1	3	Tb927.7.2510	endoplasmatic reticulum retrieval protein, putative	3	18.7	21.303	182	0.63446	24.841	-0.656399
>GeneDB|Tb927.10.3230 | organism=Trypanosoma_brucei_TREU927 | product=protein kinase, putative | location=Tb927_10_v5:837649-838770(+) | length=373	1	3	Tb927.10.3230	protein kinase, putative	3	14.5	42.206	373	0.63492	20.917	-0.655353
>GeneDB|Tb927.6.5070 | organism=Trypanosoma_brucei_TREU927 | product=hypothetical protein, conserved | location=Tb927_06_v4:1383939-1385303(+) | length=454;REV__>GeneDB|Tb927.2.6390 | organism=Trypanosoma_brucei_TREU927 | product=variant surface glycoprotein (VSG, pseudogene), putative,variant surface glycoprotein, degenerate | location=Tb927_02_v4:1180816-1182456(-) | length=547;REV__>GeneDB|Tb1…	3	33;0;1	Tb927.6.5070	hypothetical protein, conserved	33	67	51.821	454	0.63528	35.048	-0.654535
>GeneDB|Tb927.10.3640 | organism=Trypanosoma_brucei_TREU927 | product=hypothetical protein, conserved | location=Tb927_10_v5:943733-944587(-) | length=284	1	6	Tb927.10.3640	hypothetical protein, conserved	6	26.4	31.534	284	0.63548	24.219	-0.654081
>GeneDB|Tb11.01.8090 | organism=Trypanosoma_brucei_TREU927 | product=kinetoplast DNA-associated protein, putative | location=Tb927_11_01_v4:4292494-4293468(-) | length=324	1	8	Tb11.01.8090	kinetoplast DNA-associated protein, putative	8	22.8	36.609	324	0.63575	21.152	-0.653469
>GeneDB|Tb927.10.2570 | organism=Trypanosoma_brucei_TREU927 | product=lysosomal alpha-mannosidase precursor, putative | location=Tb927_10_v5:664909-667902(+) | length=997	1	7	Tb927.10.2570	lysosomal alpha-mannosidase precursor, putative	7	10.9	111.75	997	0.63629	32.138	-0.652244
>GeneDB|Tb11.39.0004 | organism=Trypanosoma_brucei_TREU927 | product=hypothetical protein, conserved | location=Tb927_11_01_v4:528037-529236(-) | length=399	1	24	Tb11.39.0004	hypothetical protein, conserved	24	58.4	45.633	399	0.63641	46.012	-0.651972
>GeneDB|Tb927.10.7120 | organism=Trypanosoma_brucei_TREU927 | product=hypothetical protein, conserved | location=Tb927_10_v5:1793875-1794852(+) | length=325;>GeneDB|Tb927.3.5450 | organism=Trypanosoma_brucei_TREU927 | product=hypothetical protein, conserved | location=Tb927_03_v4:1526227-1528926(+) | length=899;>REV_GeneDB|Tb09.244.0670 Reverse sequence, was | organism=Trypanosoma_brucei_TREU927 …	4	7;0;0;0	Tb927.10.7120	hypothetical protein, conserved	7	25.5	37.269	325	0.63744	25.16	-0.649639
>GeneDB|Tb11.47.0032 | organism=Trypanosoma_brucei_TREU927 | product=hypothetical protein, conserved | location=Tb927_11_01_v4:334977-337133(+) | length=718	1	1	Tb11.47.0032	hypothetical protein, conserved	1	1.1	78.563	718	0.63755	2.327	-0.64939
>GeneDB|Tb927.3.3850 | organism=Trypanosoma_brucei_TREU927 | product=hypothetical protein, conserved | location=Tb927_03_v4:1066556-1070719(+) | length=1387	1	7	Tb927.3.3850	hypothetical protein, conserved	7	7.9	146.55	1387	0.63782	37.849	-0.648779
>GeneDB|Tb927.7.5770 | organism=Trypanosoma_brucei_TREU927 | product=Nuclear Dbf2-related kinase | location=Tb927_07_v4:1556268-1557662(+) | length=464	1	3	Tb927.7.5770	Nuclear Dbf2-related kinase	3	8.2	53.01	464	0.63783	25.015	-0.648756
>GeneDB|Tb11.01.2200 | organism=Trypanosoma_brucei_TREU927 | product=hypothetical protein, conserved | location=Tb927_11_01_v4:2724479-2726185(+) | length=568	1	9	Tb11.01.2200	hypothetical protein, conserved	9	25.4	63.675	568	0.6381	45.85	-0.648146
>GeneDB|Tb11.01.5910 | organism=Trypanosoma_brucei_TREU927 | product=dynein intermediate chain IC70, putative | location=Tb927_11_01_v4:3744146-3745954(+) | length=602	1	25	Tb11.01.5910	dynein intermediate chain IC70, putative	25	56.5	68.115	602	0.63835	42.216	-0.64758
>GeneDB|Tb09.160.1330 | organism=Trypanosoma_brucei_TREU927 | product=hypothetical protein, conserved | location=Tb927_09_v4:581251-582360(-) | length=369	1	2	Tb09.160.1330	hypothetical protein, conserved	2	8.7	41.157	369	0.63915	26.679	-0.645774
>GeneDB|Tb11.02.4380 | organism=Trypanosoma_brucei_TREU927 | product=hypothetical protein, conserved | location=Tb927_11_01_v4:1812788-1814035(-) | length=415	1	13	Tb11.02.4380	hypothetical protein, conserved	13	42.4	45.865	415	0.63942	20.192	-0.645164
>GeneDB|Tb927.2.5160 | organism=Trypanosoma_brucei_TREU927 | product=chaperone protein DNAj, putative | location=Tb927_02_v4:910854-912056(+) | length=400	1	29	Tb927.2.5160	chaperone protein DNAj, putative	29	73.5	44.327	400	0.63986	33.367	-0.644172
>GeneDB|Tb927.10.15330 | organism=Trypanosoma_brucei_TREU927 | product=hypothetical protein, conserved | location=Tb927_10_v5:3753481-3755298(+) | length=605	1	17	Tb927.10.15330	hypothetical protein, conserved	17	38	68.478	605	0.64042	30.866	-0.64291
>GeneDB|Tb11.03.0815 | organism=Trypanosoma_brucei_TREU927 | product=unspecified product | location=Tb927_11_01_v4:73363-73635(-) | length=90	1	5	Tb11.03.0815	unspecified product	5	47.8	10.427	90	0.64045	17.437	-0.642842
>GeneDB|Tb927.5.1690 | organism=Trypanosoma_brucei_TREU927 | product=hypothetical protein, conserved | location=Tb927_05_v4:535065-536453(+) | length=462	1	7	Tb927.5.1690	hypothetical protein, conserved	7	19.7	51.619	462	0.6407	40.958	-0.642279
>GeneDB|Tb927.7.920 | organism=Trypanosoma_brucei_TREU927 | product=dynein heavy chain, putative | location=Tb927_07_v4:217065-229403(-) | length=4112	1	29	Tb927.7.920	dynein heavy chain, putative	29	10	468.08	4112	0.64094	29.726	-0.641739
>GeneDB|Tb927.3.3200 | organism=Trypanosoma_brucei_TREU927 | product=hypothetical protein, conserved | location=Tb927_03_v4:827096-828148(-) | length=350	1	11	Tb927.3.3200	hypothetical protein, conserved	11	56.3	39.357	350	0.64121	26.576	-0.641131
>GeneDB|Tb927.10.6780 | organism=Trypanosoma_brucei_TREU927 | product=vacuolar protein sorting-associated protein 45, putative | location=Tb927_10_v5:1707275-1709044(+) | length=589	1	11	Tb927.10.6780	vacuolar protein sorting-associated protein 45, putative	11	25	64.974	589	0.6418	28.073	-0.639804
>GeneDB|Tb11.18.0012 | organism=Trypanosoma_brucei_TREU927 | product=hypothetical protein, conserved | location=Tb927_11_01_v4:587227-590568(+) | length=1113	1	5	Tb11.18.0012	hypothetical protein, conserved	5	6.8	122.96	1113	0.64212	18.198	-0.639085
>GeneDB|Tb927.1.4740 | organism=Trypanosoma_brucei_TREU927 | product=hypothetical protein, conserved | location=Tb927_01_v4:971957-975136(+) | length=1059	1	2	Tb927.1.4740	hypothetical protein, conserved	2	3.5	116.56	1059	0.64367	35.698	-0.635607
>GeneDB|Tb927.10.2890 | organism=Trypanosoma_brucei_TREU927 | product=enolase | location=Tb927_10_v5:746309-747598(+) | length=429;>CON_P00924 Enolase 1 - Saccharomyces cerevisiae (Baker's yeast).;>CON_P00925 Enolase 2 - Saccharomyces cerevisiae (Baker's yeast).	3	45;1;1	Tb927.10.2890	enolase	45	88.8	46.592	429	0.64382	31.76	-0.635271
>GeneDB|Tb927.2.2190 | organism=Trypanosoma_brucei_TREU927 | product=histone deacetylase 3 | location=Tb927_02_v4:417099-419156(-) | length=685	1	5	Tb927.2.2190	histone deacetylase 3	5	8.5	75.242	685	0.64521	24.208	-0.632159
>GeneDB|Tb11.01.2800 | organism=Trypanosoma_brucei_TREU927 | product=hypothetical protein, conserved | location=Tb927_11_01_v4:2885861-2886907(+) | length=348	1	31	Tb11.01.2800	hypothetical protein, conserved	31	67.8	41.653	348	0.64531	24.726	-0.631936
>GeneDB|Tb927.10.13780 | organism=Trypanosoma_brucei_TREU927 | product=glycogen synthase kinase 3 | location=Tb927_10_v5:3364646-3365704(-) | length=352	1	21	Tb927.10.13780	glycogen synthase kinase 3	21	65.3	40.32	352	0.6455	31.664	-0.631511
>GeneDB|Tb927.3.1900 | organism=Trypanosoma_brucei_TREU927 | product=hypothetical protein, conserved | location=Tb927_03_v4:493734-496337(-) | length=867;REV__>REV_GeneDB|Tb927.6.5590 Reverse sequence, was | organism=Trypanosoma_brucei_TREU927 | product=variant surface glycoprotein (VSG, pseudogene), putative,variant surface glycoprotein, frameshift | location=Tb927_06_v4:1553302-1554900(-) | len…	2	17;1	Tb927.3.1900	hypothetical protein, conserved	17	30.6	95.755	867	0.64569	66.075	-0.631086
>GeneDB|Tb927.8.2460 | organism=Trypanosoma_brucei_TREU927 | product=hypothetical protein, conserved | location=Tb927_08_v4:734935-735789(+) | length=284	1	6	Tb927.8.2460	hypothetical protein, conserved	6	30.6	30.901	284	0.64624	18.574	-0.629858
>GeneDB|Tb927.10.5770 | organism=Trypanosoma_brucei_TREU927 | product=valosin-containing protein homolog,Transitional endoplasmic reticulum ATPase, putative | location=Tb927_10_v5:1430797-1433139(-) | length=780	1	51	Tb927.10.5770	valosin-containing protein homolog,Transitional endoplasmic reticulum ATPase, putative	51	79.5	85.825	780	0.64672	20.198	-0.628787
>GeneDB|Tb11.01.6800 | organism=Trypanosoma_brucei_TREU927 | product=1-acyl-sn-glycerol-3-phosphate acyltransferase, putative | location=Tb927_11_01_v4:3969428-3970243(-) | length=271	1	9	Tb11.01.6800	1-acyl-sn-glycerol-3-phosphate acyltransferase, putative	9	38.4	30.359	271	0.64695	28.851	-0.628274
>GeneDB|Tb927.4.1600 | organism=Trypanosoma_brucei_TREU927 | product=hypothetical protein, conserved | location=Tb927_04_v4:410790-411494(-) | length=234	1	4	Tb927.4.1600	hypothetical protein, conserved	4	21.8	27.063	234	0.64764	30.391	-0.626736
>GeneDB|Tb927.3.2890 | organism=Trypanosoma_brucei_TREU927 | product=radial spoke protein RSP10, putative | location=Tb927_03_v4:745208-746176(-) | length=322	1	8	Tb927.3.2890	radial spoke protein RSP10, putative	8	34.8	37.011	322	0.64783	33.078	-0.626313
>GeneDB|Tb11.01.0920 | organism=Trypanosoma_brucei_TREU927 | product=ADP-ribosylation factor GTPase activating protein, putative,centaurin beta 5 | location=Tb927_11_01_v4:2462290-2463165(+) | length=291	1	7	Tb11.01.0920	ADP-ribosylation factor GTPase activating protein, putative,centaurin beta 5	7	27.8	31.714	291	0.64807	29.299	-0.625778
>GeneDB|Tb927.8.4580 | organism=Trypanosoma_brucei_TREU927 | product=hypothetical protein, conserved | location=Tb927_08_v4:1357634-1359085(-) | length=483	1	29	Tb927.8.4580	hypothetical protein, conserved	29	55.5	58.084	483	0.64834	33.189	-0.625178
>GeneDB|Tb927.4.3330 | organism=Trypanosoma_brucei_TREU927 | product=hypothetical protein, conserved | location=Tb927_04_v4:871048-871599(-) | length=183	1	1	Tb927.4.3330	hypothetical protein, conserved	1	8.7	20.044	183	0.64867	13.122	-0.624443
>GeneDB|Tb927.7.510 | organism=Trypanosoma_brucei_TREU927 | product=hypothetical protein, conserved | location=Tb927_07_v4:99083-100153(-) | length=356	1	3	Tb927.7.510	hypothetical protein, conserved	3	12.9	39.995	356	0.65013	11.191	-0.6212
>GeneDB|Tb11.01.5730 | organism=Trypanosoma_brucei_TREU927 | product=ethanolamine-phosphate cytidylyltransferase | location=Tb927_11_01_v4:3687081-3688235(+) | length=384	1	12	Tb11.01.5730	ethanolamine-phosphate cytidylyltransferase	12	42.4	43.424	384	0.65038	16.162	-0.620645
>GeneDB|Tb927.6.4770 | organism=Trypanosoma_brucei_TREU927 | product=hypothetical protein, conserved | location=Tb927_06_v4:1328290-1330497(+) | length=735	1	34	Tb927.6.4770	hypothetical protein, conserved	34	57.7	83.306	735	0.65057	29.322	-0.620224
>GeneDB|Tb927.3.5020 | organism=Trypanosoma_brucei_TREU927 | product=hypothetical protein, conserved | location=Tb927_03_v4:1408124-1412365(+) | length=1413	1	36	Tb927.3.5020	hypothetical protein, conserved	36	36	155.86	1413	0.65071	55.643	-0.619913
>GeneDB|Tb927.6.1660 | organism=Trypanosoma_brucei_TREU927 | product=hypothetical protein, conserved | location=Tb927_06_v4:561048-562760(-) | length=570	1	11	Tb927.6.1660	hypothetical protein, conserved	11	26.3	65.25	570	0.6515	32.917	-0.618163
>GeneDB|Tb11.01.2570 | organism=Trypanosoma_brucei_TREU927 | product=hypothetical protein, conserved | location=Tb927_11_01_v4:2830594-2831382(+) | length=262	1	10	Tb11.01.2570	hypothetical protein, conserved	10	47.3	29.847	262	0.6518	19.874	-0.617499
>GeneDB|Tb927.10.7690 | organism=Trypanosoma_brucei_TREU927 | product=hypothetical protein, conserved,rib72 protein- like protein | location=Tb927_10_v5:1934727-1936901(-) | length=724	1	29	Tb927.10.7690	hypothetical protein, conserved,rib72 protein- like protein	29	52.1	82.837	724	0.652	27.855	-0.617056
>GeneDB|Tb927.10.9640 | organism=Trypanosoma_brucei_TREU927 | product=hypothetical protein, conserved | location=Tb927_10_v5:2375341-2376366(+) | length=341	1	8	Tb927.10.9640	hypothetical protein, conserved	8	34.3	39.29	341	0.65247	25.994	-0.616017
>GeneDB|Tb927.7.5290 | organism=Trypanosoma_brucei_TREU927 | product=hypothetical protein, conserved | location=Tb927_07_v4:1402790-1405030(+) | length=746	1	3	Tb927.7.5290	hypothetical protein, conserved	3	6.4	81.281	746	0.65283	34.603	-0.615221
>GeneDB|Tb927.3.1040 | organism=Trypanosoma_brucei_TREU927 | product=hypothetical protein, conserved (pseudogene),hypothetical protein, conserved, interrupted | location=Tb927_03_v4:259855-261048(+) | length=398	1	13	Tb927.3.1040	hypothetical protein, conserved (pseudogene),hypothetical protein, conserved, interrupted	13	37.4	46.322	398	0.65297	42.082	-0.614911
>GeneDB|Tb927.1.2570 | organism=Trypanosoma_brucei_TREU927 | product=coatomer beta subunit | location=Tb927_01_v4:603482-606430(+) | length=982;REV__>REV_GeneDB|Tb11.02.2540 Reverse sequence, was | organism=Trypanosoma_brucei_TREU927 | product=hypothetical protein, conserved | location=Tb927_11_01_v4:1382725-1383456(+) | length=243	2	39;1	Tb927.1.2570	coatomer beta subunit	39	55.7	110.05	982	0.65336	29.747	-0.61405
>GeneDB|Tb927.5.1230 | organism=Trypanosoma_brucei_TREU927 | product=hypothetical protein, conserved | location=Tb927_05_v4:408750-410201(+) | length=483	1	15	Tb927.5.1230	hypothetical protein, conserved	15	28	58.564	483	0.65372	17.294	-0.613255
>GeneDB|Tb927.10.10630 | organism=Trypanosoma_brucei_TREU927 | product=hypothetical protein, conserved | location=Tb927_10_v5:2589236-2590018(-) | length=260	1	3	Tb927.10.10630	hypothetical protein, conserved	3	13.5	29.655	260	0.65403	27.336	-0.612571
>GeneDB|Tb927.8.5290 | organism=Trypanosoma_brucei_TREU927 | product=hypothetical protein, conserved | location=Tb927_08_v4:1575347-1577200(+) | length=617	1	8	Tb927.8.5290	hypothetical protein, conserved	8	21.9	67.435	617	0.6553	30.855	-0.609773
>GeneDB|Tb11.52.0015 | organism=Trypanosoma_brucei_TREU927 | product=hypothetical protein, conserved | location=Tb927_11_01_v4:3411060-3412397(-) | length=445	1	6	Tb11.52.0015	hypothetical protein, conserved	6	18.2	51.172	445	0.65541	33.781	-0.60953
>GeneDB|Tb927.5.2640 | organism=Trypanosoma_brucei_TREU927 | product=hypothetical protein, conserved | location=Tb927_05_v4:845000-846064(+) | length=354	1	6	Tb927.5.2640	hypothetical protein, conserved	6	24.9	40.416	354	0.65612	100.05	-0.607968
>GeneDB|Tb11.52.0006 | organism=Trypanosoma_brucei_TREU927 | product=hypothetical protein, conserved (pseudogene) | location=Tb927_11_01_v4:3389194-3392949(-) | length=1251;>GeneDB|Tb11.52.0005 | organism=Trypanosoma_brucei_TREU927 | product=hypothetical protein, conserved | location=Tb927_11_01_v4:3386487-3388694(-) | length=735	2	25;1	Tb11.52.0006	hypothetical protein, conserved (pseudogene)	25	20.7	138.96	1251	0.65633	38.654	-0.607507
>GeneDB|Tb11.02.3850 | organism=Trypanosoma_brucei_TREU927 | product=ras-like small GTPase, putative | location=Tb927_11_01_v4:1680022-1680702(-) | length=226	1	1	Tb11.02.3850	ras-like small GTPase, putative	1	11.5	25.064	226	0.65719	20.486	-0.605618
>GeneDB|Tb927.2.3620 | organism=Trypanosoma_brucei_TREU927 | product=GTP-binding elongation factor Tu family, putative | location=Tb927_02_v4:646722-649139(-) | length=805	1	4	Tb927.2.3620	GTP-binding elongation factor Tu family, putative	4	7.2	87.19	805	0.65739	188.68	-0.605179
>GeneDB|Tb927.3.4910 | organism=Trypanosoma_brucei_TREU927 | product=signal peptide peptidase, putative,aspartic peptidase, clan AD, family A22B, putative | location=Tb927_03_v4:1377662-1378720(+) | length=352	1	1	Tb927.3.4910	signal peptide peptidase, putative,aspartic peptidase, clan AD, family A22B, putative	1	2.6	38.674	352	0.65763	49.275	-0.604652
>GeneDB|Tb927.6.1400 | organism=Trypanosoma_brucei_TREU927 | product=cyclophilin-type peptidyl-prolyl cis-trans isomerase, putative | location=Tb927_06_v4:505942-506724(-) | length=260;>GeneDB|Tb927.6.1320 | organism=Trypanosoma_brucei_TREU927 | product=cyclophilin-type peptidyl-prolyl cis-trans isomerase, putative | location=Tb927_06_v4:490369-490983(-) | length=204;>GeneDB|Tb927.6.1340 | organi…	5	4;2;2;2;2	Tb927.6.1400	cyclophilin-type peptidyl-prolyl cis-trans isomerase, putative	4	22.3	28.779	260	0.65878	19.208	-0.602131
>GeneDB|Tb11.01.8650 | organism=Trypanosoma_brucei_TREU927 | product=hypothetical protein, conserved | location=Tb927_11_01_v4:4438871-4445050(-) | length=2059	1	13	Tb11.01.8650	hypothetical protein, conserved	13	8.5	228.84	2059	0.65882	46.8	-0.602044
>GeneDB|Tb11.02.4200 | organism=Trypanosoma_brucei_TREU927 | product=splicing factor Prp31;date=20090417 | location=Tb927_11_01_v4:1758015-1758815(-) | length=266	1	10	Tb11.02.4200	splicing factor Prp31;date=20090417	10	60.2	28.65	266	0.65893	19.297	-0.601803
>GeneDB|Tb11.01.6510 | organism=Trypanosoma_brucei_TREU927 | product=paraflagellar rod component, putative | location=Tb927_11_01_v4:3892292-3893407(-) | length=371	1	16	Tb11.01.6510	paraflagellar rod component, putative	16	35.3	41.086	371	0.66066	44.541	-0.59802
>GeneDB|Tb927.2.2160 | organism=Trypanosoma_brucei_TREU927 | product=paraflagellar rod component, putative | location=Tb927_02_v4:411912-412901(-) | length=329	1	19	Tb927.2.2160	paraflagellar rod component, putative	19	60.5	37.731	329	0.66072	23.488	-0.597889
>GeneDB|Tb927.4.2990 | organism=Trypanosoma_brucei_TREU927 | product=hypothetical protein, conserved | location=Tb927_04_v4:791219-795088(+) | length=1289	1	3	Tb927.4.2990	hypothetical protein, conserved	3	3.4	143.1	1289	0.66081	48.425	-0.597693
>GeneDB|Tb927.5.4400 | organism=Trypanosoma_brucei_TREU927 | product=hypothetical protein, conserved | location=Tb927_05_v4:1307307-1308605(-) | length=432	1	5	Tb927.5.4400	hypothetical protein, conserved	5	24.3	47.23	432	0.66137	62.424	-0.59647
>GeneDB|Tb11.01.7330 | organism=Trypanosoma_brucei_TREU927 | product=U5 snRNP-associated 102 kDa protein, putative | location=Tb927_11_01_v4:4095977-4099006(-) | length=1009	1	2	Tb11.01.7330	U5 snRNP-associated 102 kDa protein, putative	2	3.2	111.07	1009	0.66145	16.979	-0.596296
>GeneDB|Tb11.01.5800 | organism=Trypanosoma_brucei_TREU927 | product=hypothetical protein, conserved | location=Tb927_11_01_v4:3707116-3711630(+) | length=1504	1	9	Tb11.01.5800	hypothetical protein, conserved	9	9.2	165.63	1504	0.66185	95.275	-0.595424
>GeneDB|Tb927.10.5230 | organism=Trypanosoma_brucei_TREU927 | product=ADP-ribosylation factor, putative | location=Tb927_10_v5:1295187-1295999(+) | length=270	1	8	Tb927.10.5230	ADP-ribosylation factor, putative	8	37.8	30.327	270	0.66191	82.026	-0.595293
>GeneDB|Tb11.18.0003 | organism=Trypanosoma_brucei_TREU927 | product=dynein intermediate chain, putative,dynein intermediate chain IC140 (IDA7), putative | location=Tb927_11_01_v4:624296-626725(+) | length=809	1	14	Tb11.18.0003	dynein intermediate chain, putative,dynein intermediate chain IC140 (IDA7), putative	14	20.8	90.406	809	0.6623	16.733	-0.594443
>GeneDB|Tb927.6.2690 | organism=Trypanosoma_brucei_TREU927 | product=ubiquitin carboxyl-terminal hydrolase, putative,cysteine peptidase, Clan CA, family C19, putative | location=Tb927_06_v4:807824-809743(+) | length=639	1	11	Tb927.6.2690	ubiquitin carboxyl-terminal hydrolase, putative,cysteine peptidase, Clan CA, family C19, putative	11	26.8	70.409	639	0.66232	21.353	-0.5944
>GeneDB|Tb11.02.5150 | organism=Trypanosoma_brucei_TREU927 | product=CMF70 | location=Tb927_11_01_v4:2023569-2025092(+) | length=507	1	7	Tb11.02.5150	CMF70	7	18.1	58.672	507	0.66284	36.226	-0.593267
>GeneDB|Tb927.10.7110 | organism=Trypanosoma_brucei_TREU927 | product=inositol-3-phosphate synthase, putative | location=Tb927_10_v5:1790686-1792272(+) | length=528	1	10	Tb927.10.7110	inositol-3-phosphate synthase, putative	10	29	58.274	528	0.66373	27.154	-0.591332
>GeneDB|Tb927.7.4740 | organism=Trypanosoma_brucei_TREU927 | product=hypothetical protein, conserved | location=Tb927_07_v4:1259430-1260425(-) | length=331	1	1	Tb927.7.4740	hypothetical protein, conserved	1	6	36.468	331	0.66385	11.466	-0.591071
>GeneDB|Tb927.8.5940 | organism=Trypanosoma_brucei_TREU927 | product=hypothetical protein, conserved | location=Tb927_08_v4:1742429-1743847(+) | length=472	1	2	Tb927.8.5940	hypothetical protein, conserved	2	5.3	54.878	472	0.66409	12.642	-0.590549
>GeneDB|Tb927.10.2380 | organism=Trypanosoma_brucei_TREU927 | product=hypothetical protein, conserved | location=Tb927_10_v5:609418-612168(+) | length=916;>REV_GeneDB|Tb09.160.3490 Reverse sequence, was | organism=Trypanosoma_brucei_TREU927 | product=hypothetical protein, conserved | location=Tb927_09_v4:842618-843337(+) | length=239	2	15;1	Tb927.10.2380	hypothetical protein, conserved	15	22.4	102.45	916	0.6643	27.53	-0.590093
>GeneDB|Tb927.6.4710 | organism=Trypanosoma_brucei_TREU927 | product=calmodulin, putative | location=Tb927_06_v4:1310631-1312652(+) | length=673	1	5	Tb927.6.4710	calmodulin, putative	5	9.4	74.294	673	0.66433	12.364	-0.590028
>GeneDB|Tb927.6.4140 | organism=Trypanosoma_brucei_TREU927 | product=paraflagellar rod component, putative | location=Tb927_06_v4:1195007-1195354(-) | length=115	1	7	Tb927.6.4140	paraflagellar rod component, putative	7	69.6	13.009	115	0.66496	34.831	-0.588661
>GeneDB|Tb927.7.3780 | organism=Trypanosoma_brucei_TREU927 | product=poly(A) polymerase, putative | location=Tb927_07_v4:988310-990373(-) | length=687	1	8	Tb927.7.3780	poly(A) polymerase, putative	8	17.8	74.43	687	0.66497	46.994	-0.588639
>GeneDB|Tb927.6.3970 | organism=Trypanosoma_brucei_TREU927 | product=SH3 domain protein, conserved | location=Tb927_06_v4:1165423-1166247(-) | length=274	1	1	Tb927.6.3970	SH3 domain protein, conserved	1	10.9	30.261	274	0.66512	4.3878	-0.588313
>GeneDB|Tb927.10.6800 | organism=Trypanosoma_brucei_TREU927 | product=developmentally regulated GTP-binding protein, putative | location=Tb927_10_v5:1715104-1716210(+) | length=368	1	16	Tb927.10.6800	developmentally regulated GTP-binding protein, putative	16	53	41.267	368	0.66581	26.063	-0.586818
>GeneDB|Tb927.5.3830 | organism=Trypanosoma_brucei_TREU927 | product=dihydroorotate oxidase | location=Tb927_05_v4:1193464-1194405(+) | length=313	1	8	Tb927.5.3830	dihydroorotate oxidase	8	46	34.112	313	0.66584	37.605	-0.586753
>GeneDB|Tb927.8.6980 | organism=Trypanosoma_brucei_TREU927 | product=hypothetical protein, conserved | location=Tb927_08_v4:2010423-2012924(+) | length=833	1	3	Tb927.8.6980	hypothetical protein, conserved	3	4.4	95.057	833	0.66603	80.584	-0.586341
>GeneDB|Tb927.5.3400 | organism=Trypanosoma_brucei_TREU927 | product=calcium-translocating P-type ATPase,calcium pump | location=Tb927_05_v4:1074336-1077371(-) | length=1011	1	49	Tb927.5.3400	calcium-translocating P-type ATPase,calcium pump	49	57.6	110.32	1011	0.66635	33.504	-0.585648
>GeneDB|Tb927.10.15320 | organism=Trypanosoma_brucei_TREU927 | product=hypothetical protein, conserved | location=Tb927_10_v5:3752647-3752961(+) | length=104	1	1	Tb927.10.15320	hypothetical protein, conserved	1	18.3	11.041	104	0.66648	2.1695	-0.585367
>GeneDB|Tb927.5.2700 | organism=Trypanosoma_brucei_TREU927 | product=otubain, putative,otubain cysteine peptidase, Clan CA, family C65, putative | location=Tb927_05_v4:856633-857439(+) | length=268	1	6	Tb927.5.2700	otubain, putative,otubain cysteine peptidase, Clan CA, family C65, putative	6	29.1	30.443	268	0.66682	121.18	-0.584631
>GeneDB|Tb927.5.1670 | organism=Trypanosoma_brucei_TREU927 | product=hypothetical protein, conserved | location=Tb927_05_v4:527091-528137(+) | length=348	1	3	Tb927.5.1670	hypothetical protein, conserved	3	13.5	37.922	348	0.66713	21.988	-0.58396
>GeneDB|Tb11.01.2220 | organism=Trypanosoma_brucei_TREU927 | product=UDP-N-acetylglucosamine-dolichyl-phosphate N-acetylglucosaminephosphotransferase, putative | location=Tb927_11_01_v4:2727870-2729051(+) | length=393	1	3	Tb11.01.2220	UDP-N-acetylglucosamine-dolichyl-phosphate N-acetylglucosaminephosphotransferase, putative	3	11.7	43.113	393	0.66784	11.082	-0.582426
>GeneDB|Tb927.8.3820 | organism=Trypanosoma_brucei_TREU927 | product=hypothetical protein, conserved | location=Tb927_08_v4:1138085-1139104(-) | length=339	1	2	Tb927.8.3820	hypothetical protein, conserved	2	17.1	34.81	339	0.66793	9.137	-0.582231
>GeneDB|Tb927.6.2880 | organism=Trypanosoma_brucei_TREU927 | product=kinesin, putative | location=Tb927_06_v4:863803-867060(+) | length=1085	1	7	Tb927.6.2880	kinesin, putative	7	10.3	122.12	1085	0.66891	25.732	-0.580116
>GeneDB|Tb927.10.6010 | organism=Trypanosoma_brucei_TREU927 | product=hypothetical protein, conserved | location=Tb927_10_v5:1512569-1516063(-) | length=1164	1	11	Tb927.10.6010	hypothetical protein, conserved	11	11.7	128.01	1164	0.66991	19.718	-0.577961
>GeneDB|Tb927.5.900 | organism=Trypanosoma_brucei_TREU927 | product=oligosaccharyl transferase subunit, putative | location=Tb927_05_v4:300384-302849(+) | length=821;>GeneDB|Tb927.5.910 | organism=Trypanosoma_brucei_TREU927 | product=oligosaccharyl transferase subunit, putative | location=Tb927_05_v4:303684-306149(+) | length=821	2	10;5	Tb927.5.900	oligosaccharyl transferase subunit, putative	10	16.2	92.232	821	0.66993	33.258	-0.577918
>GeneDB|Tb11.47.0034 | organism=Trypanosoma_brucei_TREU927 | product=radial spoke protein RSP3, putative | location=Tb927_11_01_v4:328168-329166(+) | length=332	1	10	Tb11.47.0034	radial spoke protein RSP3, putative	10	43.4	39.377	332	0.67068	22.137	-0.576304
>GeneDB|Tb927.10.2190 | organism=Trypanosoma_brucei_TREU927 | product=hypothetical protein, conserved | location=Tb927_10_v5:562299-563183(+) | length=294	1	15	Tb927.10.2190	hypothetical protein, conserved	15	57.1	34.552	294	0.67141	35.544	-0.574734
>GeneDB|Tb927.10.5430 | organism=Trypanosoma_brucei_TREU927 | product=hypothetical protein, conserved | location=Tb927_10_v5:1367462-1368307(+) | length=281	1	3	Tb927.10.5430	hypothetical protein, conserved	3	11.7	32.616	281	0.67212	52.171	-0.573209
>GeneDB|Tb927.7.4780 | organism=Trypanosoma_brucei_TREU927 | product=hypothetical protein, conserved | location=Tb927_07_v4:1265833-1266315(-) | length=160	1	1	Tb927.7.4780	hypothetical protein, conserved	1	13.1	18.274	160	0.67252	16.465	-0.572351
>GeneDB|Tb927.10.15730 | organism=Trypanosoma_brucei_TREU927 | product=hypothetical protein, conserved | location=Tb927_10_v5:3871247-3881629(+) | length=3460	1	2	Tb927.10.15730	hypothetical protein, conserved	2	0.9	383.41	3460	0.67271	238.48	-0.571943
>GeneDB|Tb11.02.1190 | organism=Trypanosoma_brucei_TREU927 | product=hypothetical protein, conserved | location=Tb927_11_01_v4:1070180-1071727(+) | length=515;REV__>REV_GeneDB|Tb11.01.8330 Reverse sequence, was | organism=Trypanosoma_brucei_TREU927 | product=hypothetical protein, conserved | location=Tb927_11_01_v4:4351475-4353325(-) | length=616	2	16;0	Tb11.02.1190	hypothetical protein, conserved	16	34.8	61.184	515	0.67287	25.048	-0.5716
>GeneDB|Tb927.6.1140 | organism=Trypanosoma_brucei_TREU927 | product=dolichyl-P-Man:GDP-Man5GlcNAc2-PP-dolichyl alpha-1,2-mannosyltransferase, putative | location=Tb927_06_v4:443904-445928(-) | length=674	1	3	Tb927.6.1140	dolichyl-P-Man:GDP-Man5GlcNAc2-PP-dolichyl alpha-1,2-mannosyltransferase, putative	3	5	75.202	674	0.67403	19.25	-0.569115
>GeneDB|Tb927.3.5420 | organism=Trypanosoma_brucei_TREU927 | product=protein transport protein Sec24 | location=Tb927_03_v4:1515728-1518439(+) | length=903;>REV_GeneDB|Tb11.01.6430 Reverse sequence, was | organism=Trypanosoma_brucei_TREU927 | product=hypothetical protein, conserved | location=Tb927_11_01_v4:3875124-3876545(-) | length=473	2	6;0	Tb927.3.5420	protein transport protein Sec24	6	11	100.87	903	0.67494	10.351	-0.567169
>GeneDB|Tb927.5.3450 | organism=Trypanosoma_brucei_TREU927 | product=hypothetical protein, conserved | location=Tb927_05_v4:1086814-1088397(-) | length=527	1	13	Tb927.5.3450	hypothetical protein, conserved	13	35.1	57.992	527	0.67522	20.243	-0.56657
>GeneDB|Tb927.10.15130 | organism=Trypanosoma_brucei_TREU927 | product=synaptobrevin-type vesicle transport protein, putative,protein SLY2 | location=Tb927_10_v5:3692791-3693558(+) | length=255	1	4	Tb927.10.15130	synaptobrevin-type vesicle transport protein, putative,protein SLY2	4	17.6	29.48	255	0.67577	21.565	-0.565396
>GeneDB|Tb927.3.3110 | organism=Trypanosoma_brucei_TREU927 | product=hypothetical protein, conserved | location=Tb927_03_v4:797071-800256(-) | length=1061	1	4	Tb927.3.3110	hypothetical protein, conserved	4	5.8	118.8	1061	0.67647	59.34	-0.563902
>GeneDB|Tb927.7.3560 | organism=Trypanosoma_brucei_TREU927 | product=hypothetical protein, conserved | location=Tb927_07_v4:921614-926896(-) | length=1760	1	20	Tb927.7.3560	hypothetical protein, conserved	20	16	199.21	1760	0.67827	75.266	-0.560068
>GeneDB|Tb927.10.1130 | organism=Trypanosoma_brucei_TREU927 | product=dynein arm light chain, axonemal, putative | location=Tb927_10_v5:303908-304732(-) | length=274	1	4	Tb927.10.1130	dynein arm light chain, axonemal, putative	4	21.5	31.176	274	0.67831	27.377	-0.559983
>GeneDB|Tb927.4.2060 | organism=Trypanosoma_brucei_TREU927 | product=hypothetical protein, conserved | location=Tb927_04_v4:515186-516946(-) | length=586	1	20	Tb927.4.2060	hypothetical protein, conserved	20	38.4	66.835	586	0.67889	38.246	-0.55875
>GeneDB|Tb927.5.2380 | organism=Trypanosoma_brucei_TREU927 | product=hydrolase, alpha/beta fold family, putative | location=Tb927_05_v4:756713-757651(+) | length=312	1	5	Tb927.5.2380	hydrolase, alpha/beta fold family, putative	5	21.5	34.433	312	0.68081	18.883	-0.554676
>GeneDB|Tb927.4.1890 | organism=Trypanosoma_brucei_TREU927 | product=hypothetical protein, conserved | location=Tb927_04_v4:474764-475438(-) | length=224	1	7	Tb927.4.1890	hypothetical protein, conserved	7	41.5	26.433	224	0.681	75.184	-0.554273
>GeneDB|Tb11.02.1290 | organism=Trypanosoma_brucei_TREU927 | product=hypothetical protein, conserved | location=Tb927_11_01_v4:1096944-1097822(+) | length=292	1	4	Tb11.02.1290	hypothetical protein, conserved	4	20.2	32.372	292	0.6816	32.753	-0.553003
>GeneDB|Tb927.10.6670 | organism=Trypanosoma_brucei_TREU927 | product=dynein light chain, putative | location=Tb927_10_v5:1685431-1685808(+) | length=125	1	6	Tb927.10.6670	dynein light chain, putative	6	56.8	14.101	125	0.68163	30.079	-0.552939
>GeneDB|Tb927.8.1140 | organism=Trypanosoma_brucei_TREU927 | product=hypothetical protein, conserved | location=Tb927_08_v4:365244-366299(-) | length=351	1	3	Tb927.8.1140	hypothetical protein, conserved	3	14.5	38.292	351	0.68314	30.463	-0.549747
>GeneDB|Tb11.01.5900 | organism=Trypanosoma_brucei_TREU927 | product=vacuolar sorting protein, putative | location=Tb927_11_01_v4:3742750-3743430(+) | length=226	1	5	Tb11.01.5900	vacuolar sorting protein, putative	5	25.7	25.075	226	0.68499	22.384	-0.545845
>GeneDB|Tb11.57.0008 | organism=Trypanosoma_brucei_TREU927 | product=calpain-like protein, putative,cytoskeleton assocociated protein, putative | location=Tb927_11_01_v4:279198-296582(+) | length=5795;REV__>GeneDB|Tb927.5.3510 | organism=Trypanosoma_brucei_TREU927 | product=structural maintenance of chromosome 3 , putative | location=Tb927_05_v4:1102436-1106035(+) | length=1199;>GeneDB|Tb11.01.43…	4	7;0;0;0	Tb11.57.0008	calpain-like protein, putative,cytoskeleton assocociated protein, putative	7	1.9	658.19	5795	0.6864	25.335	-0.542879
>GeneDB|Tb927.4.3740 | organism=Trypanosoma_brucei_TREU927 | product=flagellar attachment zone protein | location=Tb927_04_v4:941976-947054(-) | length=1692;>GeneDB|Tb927.5.2440 | organism=Trypanosoma_brucei_TREU927 | product=hypothetical protein, conserved | location=Tb927_05_v4:779968-783501(+) | length=1177;>REV_GeneDB|Tb927.5.2440 Reverse sequence, was | organism=Trypanosoma_brucei_TREU927 | …	10	56;0;0;0;0;0;0;0;0;0	Tb927.4.3740	flagellar attachment zone protein	56	68.1	192.57	1692	0.68667	41.192	-0.542311
>GeneDB|Tb927.10.15280 | organism=Trypanosoma_brucei_TREU927 | product=hypothetical protein, conserved | location=Tb927_10_v5:3726748-3730341(+) | length=1197	1	6	Tb927.10.15280	hypothetical protein, conserved	6	4.6	131.3	1197	0.68733	39.387	-0.540925
>GeneDB|Tb11.01.5260 | organism=Trypanosoma_brucei_TREU927 | product=radial spoke protein RSP11, putative | location=Tb927_11_01_v4:3588169-3588759(-) | length=196	1	4	Tb11.01.5260	radial spoke protein RSP11, putative	4	30.1	22.035	196	0.68734	26.473	-0.540904
>GeneDB|Tb927.10.5630 | organism=Trypanosoma_brucei_TREU927 | product=hypothetical protein, conserved | location=Tb927_10_v5:1406244-1406801(+) | length=185	1	3	Tb927.10.5630	hypothetical protein, conserved	3	20.5	21.709	185	0.68737	24.996	-0.540841
>GeneDB|Tb11.50.0007 | organism=Trypanosoma_brucei_TREU927 | product=dynein light chain LC8, putative | location=Tb927_11_01_v4:173386-173658(-) | length=90	1	7	Tb11.50.0007	dynein light chain LC8, putative	7	51.1	10.429	90	0.6874	19.24	-0.540778
>GeneDB|Tb927.10.6490 | organism=Trypanosoma_brucei_TREU927 | product=hypothetical protein, conserved | location=Tb927_10_v5:1644685-1645170(+) | length=161	1	8	Tb927.10.6490	hypothetical protein, conserved	8	43.5	19.53	161	0.68752	18.756	-0.540526
>GeneDB|Tb11.01.4370 | organism=Trypanosoma_brucei_TREU927 | product=hypothetical protein, conserved | location=Tb927_11_01_v4:3291750-3294170(+) | length=806	1	42	Tb11.01.4370	hypothetical protein, conserved	42	52.9	90.654	806	0.68768	29.122	-0.540191
>GeneDB|Tb927.8.2210 | organism=Trypanosoma_brucei_TREU927 | product=pteridine reductase | location=Tb927_08_v4:677634-678743(+) | length=369	1	4	Tb927.8.2210	pteridine reductase	4	21.7	40.289	369	0.68769	26.126	-0.54017
>GeneDB|Tb927.10.350 | organism=Trypanosoma_brucei_TREU927 | product=protein kinase, putative | location=Tb927_10_v5:96402-97940(+) | length=512	1	9	Tb927.10.350	protein kinase, putative	9	24	58.557	512	0.6877	65.24	-0.540149
>GeneDB|Tb09.160.2200 | organism=Trypanosoma_brucei_TREU927 | product=hypothetical protein, conserved | location=Tb927_09_v4:670431-672170(+) | length=579	1	3	Tb09.160.2200	hypothetical protein, conserved	3	7.4	61.672	579	0.68806	235.03	-0.539394
>GeneDB|Tb927.2.4810 | organism=Trypanosoma_brucei_TREU927 | product=hypothetical protein, conserved | location=Tb927_02_v4:853190-857212(-) | length=1340	1	22	Tb927.2.4810	hypothetical protein, conserved	22	24	150.5	1340	0.68816	40.686	-0.539184
>GeneDB|Tb927.4.1340 | organism=Trypanosoma_brucei_TREU927 | product=cleavage and polyadenylation specificity factor subunit, putative | location=Tb927_04_v4:352014-354326(-) | length=770	1	9	Tb927.4.1340	cleavage and polyadenylation specificity factor subunit, putative	9	15.1	85.313	770	0.68837	31.463	-0.538744
>GeneDB|Tb11.47.0016 | organism=Trypanosoma_brucei_TREU927 | product=hypothetical protein, conserved | location=Tb927_11_01_v4:378072-378407(+) | length=111	1	5	Tb11.47.0016	hypothetical protein, conserved	5	78.4	12.271	111	0.68847	25.691	-0.538534
>GeneDB|Tb09.211.3890 | organism=Trypanosoma_brucei_TREU927 | product=hypothetical protein, conserved | location=Tb927_09_v4:1998911-2002756(+) | length=1281	1	10	Tb09.211.3890	hypothetical protein, conserved	10	9.5	143.91	1281	0.68934	30.366	-0.536712
>GeneDB|Tb11.01.6780 | organism=Trypanosoma_brucei_TREU927 | product=chaperone protein DNAj, putative,heat shock protein-like protein, putative | location=Tb927_11_01_v4:3965276-3966235(-) | length=319	1	16	Tb11.01.6780	chaperone protein DNAj, putative,heat shock protein-like protein, putative	16	71.5	35.32	319	0.68955	30.189	-0.536273
>GeneDB|Tb11.01.6840 | organism=Trypanosoma_brucei_TREU927 | product=hypothetical protein, conserved | location=Tb927_11_01_v4:3976856-3978904(-) | length=682	1	11	Tb11.01.6840	hypothetical protein, conserved	11	19.8	77.343	682	0.68971	23.872	-0.535938
>GeneDB|Tb927.10.13110 | organism=Trypanosoma_brucei_TREU927 | product=dynein light chain, putative,dynein light chain 2B, cytoplasmic, putative,predicted dynein modulator,roadblock/LC7 family member | location=Tb927_10_v5:3191431-3191787(-) | length=118	1	5	Tb927.10.13110	dynein light chain, putative,dynein light chain 2B, cytoplasmic, putative,predicted dynein modulator,roadblock/LC7 family member	5	55.9	12.826	118	0.68993	26.636	-0.535478
>GeneDB|Tb11.03.0965 | organism=Trypanosoma_brucei_TREU927 | product=hypothetical protein, conserved | location=Tb927_11_01_v4:38903-39262(-) | length=119	1	2	Tb11.03.0965	hypothetical protein, conserved	2	42	13.344	119	0.69077	42.446	-0.533723
>GeneDB|Tb927.4.1690 | organism=Trypanosoma_brucei_TREU927 | product=hypothetical protein, conserved | location=Tb927_04_v4:432107-433048(-) | length=313	1	4	Tb927.4.1690	hypothetical protein, conserved	4	13.1	34.04	313	0.691	53.041	-0.533242
>GeneDB|Tb09.211.0485 | organism=Trypanosoma_brucei_TREU927 | product=hypothetical protein, conserved | location=Tb927_09_v4:1347154-1347459(-) | length=101	1	1	Tb09.211.0485	hypothetical protein, conserved	1	9.9	12.292	101	0.69135	45.912	-0.532512
>GeneDB|Tb11.02.3900 | organism=Trypanosoma_brucei_TREU927 | product=hypothetical protein, conserved | location=Tb927_11_01_v4:1691622-1692929(-) | length=435	1	6	Tb11.02.3900	hypothetical protein, conserved	6	22.8	49.128	435	0.69142	27.404	-0.532366
>GeneDB|Tb927.10.5350 | organism=Trypanosoma_brucei_TREU927 | product=dynein heavy chain, putative | location=Tb927_10_v5:1334522-1346950(+) | length=4142	1	26	Tb927.10.5350	dynein heavy chain, putative	26	8.8	474.7	4142	0.69172	23.976	-0.53174
>GeneDB|Tb11.02.0330 | organism=Trypanosoma_brucei_TREU927 | product=UDP-galactose 4-epimerase | location=Tb927_11_01_v4:782104-783291(-) | length=395	1	9	Tb11.02.0330	UDP-galactose 4-epimerase	9	36.5	43.517	395	0.69179	25.321	-0.531594
>GeneDB|Tb927.8.3270 | organism=Trypanosoma_brucei_TREU927 | product=hypothetical protein | location=Tb927_08_v4:983522-984127(+) | length=201	1	4	Tb927.8.3270	hypothetical protein	4	25.9	21.687	201	0.69244	265.62	-0.530239
>GeneDB|Tb927.4.450 | organism=Trypanosoma_brucei_TREU927 | product=coatomer alpha subunit, putative | location=Tb927_04_v4:131246-134824(-) | length=1192	1	46	Tb927.4.450	coatomer alpha subunit, putative	46	49.9	132.85	1192	0.69379	44.021	-0.527429
>GeneDB|Tb927.3.2330 | organism=Trypanosoma_brucei_TREU927 | product=hypothetical protein, conserved | location=Tb927_03_v4:597683-599539(+) | length=618	1	1	Tb927.3.2330	hypothetical protein, conserved	1	3.2	67.492	618	0.69481	11.507	-0.52531
>GeneDB|Tb927.10.6650 | organism=Trypanosoma_brucei_TREU927 | product=hypothetical protein, conserved,G10 protein homologue, putative | location=Tb927_10_v5:1683471-1684196(+) | length=241	1	2	Tb927.10.6650	hypothetical protein, conserved,G10 protein homologue, putative	2	12.4	27.099	241	0.69498	5.0248	-0.524957
>GeneDB|Tb927.8.6230 | organism=Trypanosoma_brucei_TREU927 | product=hypothetical protein, conserved | location=Tb927_08_v4:1812959-1813948(+) | length=329	1	6	Tb927.8.6230	hypothetical protein, conserved	6	19.1	37.268	329	0.6956	57.155	-0.52367
>GeneDB|Tb927.8.1550 | organism=Trypanosoma_brucei_TREU927 | product=paraflagellar rod component, putative | location=Tb927_08_v4:503216-505552(+) | length=778;>GeneDB|Tb927.7.500 | organism=Trypanosoma_brucei_TREU927 | product=hypothetical protein, conserved | location=Tb927_07_v4:93796-98511(-) | length=1571	2	59;1	Tb927.8.1550	paraflagellar rod component, putative	59	81.5	88.178	778	0.69587	36.655	-0.52311
>GeneDB|Tb09.211.2250 | organism=Trypanosoma_brucei_TREU927 | product=hypothetical protein, conserved | location=Tb927_09_v4:1665596-1666402(-) | length=268	1	8	Tb09.211.2250	hypothetical protein, conserved	8	41	31.568	268	0.69614	18.38	-0.522551
>GeneDB|Tb09.160.2260 | organism=Trypanosoma_brucei_TREU927 | product=kinesin | location=Tb927_09_v4:679871-681946(+) | length=691	1	3	Tb09.160.2260	kinesin	3	6.5	77.434	691	0.69651	45.141	-0.521784
>GeneDB|Tb927.4.3060 | organism=Trypanosoma_brucei_TREU927 | product=hypothetical protein, conserved | location=Tb927_04_v4:810076-810522(+) | length=148	1	10	Tb927.4.3060	hypothetical protein, conserved	10	45.3	17.732	148	0.69666	27.142	-0.521473
>GeneDB|Tb927.2.3580 | organism=Trypanosoma_brucei_TREU927 | product=transcription elongation factor s-II, putative | location=Tb927_02_v4:643102-644505(-) | length=467	1	12	Tb927.2.3580	transcription elongation factor s-II, putative	12	36.8	52.172	467	0.69682	26.653	-0.521142
>GeneDB|Tb927.7.6890 | organism=Trypanosoma_brucei_TREU927 | product=hypothetical protein, conserved | location=Tb927_07_v4:1963165-1963929(-) | length=254	1	13	Tb927.7.6890	hypothetical protein, conserved	13	63.8	28.794	254	0.69691	24.483	-0.520956
>GeneDB|Tb927.6.3340 | organism=Trypanosoma_brucei_TREU927 | product=hypothetical protein, conserved | location=Tb927_06_v4:981464-982090(+) | length=208	1	5	Tb927.6.3340	hypothetical protein, conserved	5	35.1	24.305	208	0.69699	15.389	-0.52079
>GeneDB|Tb11.01.6740 | organism=Trypanosoma_brucei_TREU927 | product=Tb5.20 | location=Tb927_11_01_v4:3954000-3957518(-) | length=1172	1	19	Tb11.01.6740	Tb5.20	19	16.4	127.92	1172	0.69716	54.06	-0.520438
>GeneDB|Tb927.3.5180 | organism=Trypanosoma_brucei_TREU927 | product=cofilin/actin depolymerizing factor, putative | location=Tb927_03_v4:1453906-1454316(+) | length=136	1	9	Tb927.3.5180	cofilin/actin depolymerizing factor, putative	9	83.1	15.119	136	0.6985	44.762	-0.517668
>GeneDB|Tb11.01.1550 | organism=Trypanosoma_brucei_TREU927 | product=calmodulin, putative | location=Tb927_11_01_v4:2593757-2594248(-) | length=163	1	4	Tb11.01.1550	calmodulin, putative	4	41.1	18.411	163	0.69865	15.021	-0.517358
>GeneDB|Tb927.6.1010 | organism=Trypanosoma_brucei_TREU927 | product=cysteine peptidase precursor,cysteine peptidase, Clan CA, family C1, Cathepsin L-like | location=Tb927_06_v4:413649-415001(-) | length=450;>GeneDB|Tb927.6.1020 | organism=Trypanosoma_brucei_TREU927 | product=cysteine peptidase precursor,cysteine peptidase, Clan CA, family C1, Cathepsin L-like | location=Tb927_06_v4:415413-416765…	5	1;1;1;1;1	Tb927.6.1010	cysteine peptidase precursor,cysteine peptidase, Clan CA, family C1, Cathepsin L-like	1	9.1	48.439	450	0.69873	26.912	-0.517193
>GeneDB|Tb927.8.2290 | organism=Trypanosoma_brucei_TREU927 | product=hypothetical protein, conserved | location=Tb927_08_v4:697189-697848(+) | length=219	1	10	Tb927.8.2290	hypothetical protein, conserved	10	72.1	23.428	219	0.6994	16.609	-0.51581
>GeneDB|Tb11.01.7810 | organism=Trypanosoma_brucei_TREU927 | product=minichromosome maintenance (MCM) complex subunit, putative | location=Tb927_11_01_v4:4213926-4216121(-) | length=731	1	2	Tb11.01.7810	minichromosome maintenance (MCM) complex subunit, putative	2	1.5	81.263	731	0.69967	11.871	-0.515253
>GeneDB|Tb927.10.6310 | organism=Trypanosoma_brucei_TREU927 | product=major vault protein, putative | location=Tb927_10_v5:1595162-1597750(-) | length=862	1	20	Tb927.10.6310	major vault protein, putative	20	37.7	96.198	862	0.69981	23.263	-0.514965
>GeneDB|Tb927.10.13480 | organism=Trypanosoma_brucei_TREU927 | product=protein kinase, putative | location=Tb927_10_v5:3291808-3292635(-) | length=275;>GeneDB|Tb927.10.13490 | organism=Trypanosoma_brucei_TREU927 | product=serine/threonine kinase, putative | location=Tb927_10_v5:3293978-3294799(-) | length=273	2	1;1	Tb927.10.13480	protein kinase, putative	1	5.8	31.041	275	0.6999	8.1509	-0.514779
>GeneDB|Tb927.5.1870 | organism=Trypanosoma_brucei_TREU927 | product=hypothetical protein, conserved,serine peptidase, Clan SJ, family S16, putative | location=Tb927_05_v4:580367-583030(+) | length=887	1	3	Tb927.5.1870	hypothetical protein, conserved,serine peptidase, Clan SJ, family S16, putative	3	4.6	96.728	887	0.70107	86.477	-0.51237
>GeneDB|Tb927.4.660 | organism=Trypanosoma_brucei_TREU927 | product=hypothetical protein, conserved | location=Tb927_04_v4:189228-191291(-) | length=687	1	12	Tb927.4.660	hypothetical protein, conserved	12	26.8	78.751	687	0.70276	25.287	-0.508896
>GeneDB|Tb927.7.7250 | organism=Trypanosoma_brucei_TREU927 | product=hypothetical protein, conserved | location=Tb927_07_v4:2088876-2092829(-) | length=1317	1	9	Tb927.7.7250	hypothetical protein, conserved	9	10	142.4	1317	0.70287	57.463	-0.50867
>GeneDB|Tb09.160.1260 | organism=Trypanosoma_brucei_TREU927 | product=hypothetical protein, conserved | location=Tb927_09_v4:567575-568264(-) | length=229	1	2	Tb09.160.1260	hypothetical protein, conserved	2	15.7	24.515	229	0.70332	16.193	-0.507747
>GeneDB|Tb11.01.2670 | organism=Trypanosoma_brucei_TREU927 | product=MENG,flagellar component | location=Tb927_11_01_v4:2850744-2853290(+) | length=848	1	15	Tb11.01.2670	MENG,flagellar component	15	19.8	99.792	848	0.70369	45.174	-0.506988
>GeneDB|Tb927.3.930 | organism=Trypanosoma_brucei_TREU927 | product=dynein heavy chain, putative | location=Tb927_03_v4:217342-231261(+) | length=4639;REV__>GeneDB|Tb11.52.0018 | organism=Trypanosoma_brucei_TREU927 | product=phospholipid-transporting ATPase, putative | location=Tb927_11_01_v4:3418079-3422788(-) | length=1569;REV__>GeneDB|Tb11.02.2050 | organism=Trypanosoma_brucei_TREU927 | produc…	7	185;0;0;0;0;1;1	Tb927.3.930	dynein heavy chain, putative	185	48.6	531.41	4639	0.70385	39.364	-0.50666
>GeneDB|Tb09.211.0160 | organism=Trypanosoma_brucei_TREU927 | product=hypothetical protein, conserved | location=Tb927_09_v4:1291554-1293482(-) | length=642	1	7	Tb09.211.0160	hypothetical protein, conserved	7	14	70.844	642	0.70401	29.03	-0.506332
>GeneDB|Tb09.211.1790 | organism=Trypanosoma_brucei_TREU927 | product=TAX-1,flagellar protein | location=Tb927_09_v4:1576654-1577745(-) | length=363	1	5	Tb09.211.1790	TAX-1,flagellar protein	5	26.2	40.684	363	0.70446	58.811	-0.50541
>GeneDB|Tb927.8.6050 | organism=Trypanosoma_brucei_TREU927 | product=hypothetical protein, conserved | location=Tb927_08_v4:1765192-1765953(+) | length=253	1	4	Tb927.8.6050	hypothetical protein, conserved	4	15	27.343	253	0.70468	44.69	-0.50496
>GeneDB|Tb09.244.2540 | organism=Trypanosoma_brucei_TREU927 | product=ADP-ribosylation factor GTPase activating protein, putative | location=Tb927_09_v4:2363596-2364837(+) | length=413	1	6	Tb09.244.2540	ADP-ribosylation factor GTPase activating protein, putative	6	24	45.724	413	0.70475	33.247	-0.504817
>GeneDB|Tb927.7.4870 | organism=Trypanosoma_brucei_TREU927 | product=hypothetical protein, conserved | location=Tb927_07_v4:1279546-1280358(-) | length=270	1	6	Tb927.7.4870	hypothetical protein, conserved	6	26.7	30.457	270	0.70524	25.088	-0.503814
>GeneDB|Tb11.01.6870 | organism=Trypanosoma_brucei_TREU927 | product=hypothetical protein, conserved | location=Tb927_11_01_v4:3982404-3983309(-) | length=301	1	5	Tb11.01.6870	hypothetical protein, conserved	5	23.6	33.135	301	0.70534	19.008	-0.503609
>GeneDB|Tb927.8.5510 | organism=Trypanosoma_brucei_TREU927 | product=apurinic/apyrimidinic endonuclease, putative | location=Tb927_08_v4:1630582-1631772(+) | length=396	1	6	Tb927.8.5510	apurinic/apyrimidinic endonuclease, putative	6	23.7	44.375	396	0.70541	30.502	-0.503466
>GeneDB|Tb09.211.3780 | organism=Trypanosoma_brucei_TREU927 | product=hypothetical protein, conserved | location=Tb927_09_v4:1977012-1978772(+) | length=586	1	4	Tb09.211.3780	hypothetical protein, conserved	4	11.8	65.286	586	0.7055	24.285	-0.503282
>GeneDB|Tb09.160.5100 | organism=Trypanosoma_brucei_TREU927 | product=hypothetical protein, conserved | location=Tb927_09_v4:1086485-1087186(+) | length=233	1	13	Tb09.160.5100	hypothetical protein, conserved	13	76.4	26.87	233	0.70566	31.585	-0.502955
>GeneDB|Tb11.01.3010 | organism=Trypanosoma_brucei_TREU927 | product=dynein heavy chain, putative | location=Tb927_11_01_v4:2938451-2951179(+) | length=4242	1	49	Tb11.01.3010	dynein heavy chain, putative	49	17.8	480.25	4242	0.70618	33.314	-0.501892
>GeneDB|Tb11.02.1500 | organism=Trypanosoma_brucei_TREU927 | product=hypothetical protein, conserved | location=Tb927_11_01_v4:1148665-1150410(+) | length=581	1	6	Tb11.02.1500	hypothetical protein, conserved	6	13.6	62.906	581	0.70663	25.093	-0.500973
>GeneDB|Tb927.6.3870 | organism=Trypanosoma_brucei_TREU927 | product=RNA-binding protein, putative | location=Tb927_06_v4:1145078-1145722(-) | length=214	1	7	Tb927.6.3870	RNA-binding protein, putative	7	29.4	22.904	214	0.70699	51.136	-0.500238
>GeneDB|Tb11.02.1000 | organism=Trypanosoma_brucei_TREU927 | product=hypothetical protein, conserved | location=Tb927_11_01_v4:1018778-1021330(+) | length=850	1	9	Tb11.02.1000	hypothetical protein, conserved	9	16.9	91.938	850	0.70702	76.841	-0.500177
>GeneDB|Tb927.10.2950 | organism=Trypanosoma_brucei_TREU927 | product=hypothetical protein, conserved | location=Tb927_10_v5:766784-772387(+) | length=1867	1	5	Tb927.10.2950	hypothetical protein, conserved	5	4.8	206.8	1867	0.70716	63.732	-0.499891
>GeneDB|Tb927.6.3150 | organism=Trypanosoma_brucei_TREU927 | product=Hydin,flagellar component | location=Tb927_06_v4:927480-941045(+) | length=4521	1	26	Tb927.6.3150	Hydin,flagellar component	26	11.3	501.13	4521	0.70729	35.563	-0.499626
>GeneDB|Tb927.7.1920 | organism=Trypanosoma_brucei_TREU927 | product=paraflagellar rod component, putative | location=Tb927_07_v4:458754-460385(+) | length=543	1	21	Tb927.7.1920	paraflagellar rod component, putative	21	57.3	59.271	543	0.70806	25.777	-0.498056
>GeneDB|Tb927.7.1310 | organism=Trypanosoma_brucei_TREU927 | product=hypothetical protein, conserved | location=Tb927_07_v4:336723-340766(+) | length=1347	1	20	Tb927.7.1310	hypothetical protein, conserved	20	22.4	152.52	1347	0.70936	38.528	-0.49541
>GeneDB|Tb927.6.1830 | organism=Trypanosoma_brucei_TREU927 | product=hypothetical protein, conserved | location=Tb927_06_v4:608324-609652(-) | length=442	1	4	Tb927.6.1830	hypothetical protein, conserved	4	19.2	49.927	442	0.70945	41.835	-0.495227
>GeneDB|Tb927.1.990 | organism=Trypanosoma_brucei_TREU927 | product=hypothetical protein, conserved | location=Tb927_01_v4:288582-289706(+) | length=374	1	10	Tb927.1.990	hypothetical protein, conserved	10	32.1	42.207	374	0.70953	30.119	-0.495064
>GeneDB|Tb11.01.2150 | organism=Trypanosoma_brucei_TREU927 | product=hypothetical protein, conserved | location=Tb927_11_01_v4:2716037-2717191(+) | length=384	1	2	Tb11.01.2150	hypothetical protein, conserved	2	5.5	43.177	384	0.70969	7.5673	-0.494739
>GeneDB|Tb927.5.1540 | organism=Trypanosoma_brucei_TREU927 | product=hypothetical protein, conserved | location=Tb927_05_v4:484163-486370(-) | length=735	1	2	Tb927.5.1540	hypothetical protein, conserved	2	3.8	82.248	735	0.70978	10.065	-0.494556
>GeneDB|Tb927.6.3040 | organism=Trypanosoma_brucei_TREU927 | product=small GTP-binding protein Rab28, putative,Ras- related protein Rab-26 (Rab26), putative | location=Tb927_06_v4:903517-904239(+) | length=240	1	4	Tb927.6.3040	small GTP-binding protein Rab28, putative,Ras- related protein Rab-26 (Rab26), putative	4	20	26.019	240	0.71189	20.573	-0.490274
>GeneDB|Tb927.10.3200 | organism=Trypanosoma_brucei_TREU927 | product=U2 splicing auxiliary factor, putative | location=Tb927_10_v5:829453-830196(+) | length=247	1	11	Tb927.10.3200	U2 splicing auxiliary factor, putative	11	39.3	29.114	247	0.7119	24.766	-0.490253
>GeneDB|Tb927.4.2400 | organism=Trypanosoma_brucei_TREU927 | product=hypothetical protein, conserved | location=Tb927_04_v4:619314-623600(+) | length=1428	1	2	Tb927.4.2400	hypothetical protein, conserved	2	2.2	156.86	1428	0.71218	25.124	-0.489686
>GeneDB|Tb11.01.1960 | organism=Trypanosoma_brucei_TREU927 | product=hypothetical protein, conserved | location=Tb927_11_01_v4:2675061-2676533(+) | length=490	1	10	Tb11.01.1960	hypothetical protein, conserved	10	31.8	53.432	490	0.71242	22.43	-0.4892
>GeneDB|Tb927.8.4870 | organism=Trypanosoma_brucei_TREU927 | product=DIGIT,flagellar component | location=Tb927_08_v4:1433539-1437153(-) | length=1204	1	13	Tb927.8.4870	DIGIT,flagellar component	13	12.6	136.49	1204	0.71328	28.315	-0.48746
>GeneDB|Tb09.160.3090 | organism=Trypanosoma_brucei_TREU927 | product=heat shock protein, putative,HSP70-like protein | location=Tb927_09_v4:783199-785706(+) | length=833	1	21	Tb09.160.3090	heat shock protein, putative,HSP70-like protein	21	33.1	90.898	833	0.71345	27.886	-0.487116
>GeneDB|Tb927.7.1120 | organism=Trypanosoma_brucei_TREU927 | product=trypanothione/tryparedoxin dependent peroxidase 1, cytosolic,glutathione peroxidase-like protein 1 | location=Tb927_07_v4:290302-290802(+) | length=166	1	2	Tb927.7.1120	trypanothione/tryparedoxin dependent peroxidase 1, cytosolic,glutathione peroxidase-like protein 1	2	32.5	18.588	166	0.71389	36.028	-0.486226
>GeneDB|Tb09.160.4520 | organism=Trypanosoma_brucei_TREU927 | product=calmodulin, putative | location=Tb927_09_v4:967126-967599(+) | length=157	1	9	Tb09.160.4520	calmodulin, putative	9	80.3	17.842	157	0.71437	35.521	-0.485257
>GeneDB|Tb927.8.7990 | organism=Trypanosoma_brucei_TREU927 | product=hypothetical protein, conserved | location=Tb927_08_v4:2355893-2370721(+) | length=4942	1	8	Tb927.8.7990	hypothetical protein, conserved	8	3.1	550.54	4942	0.71585	44.116	-0.482271
>GeneDB|Tb09.160.1210 | organism=Trypanosoma_brucei_TREU927 | product=hypothetical protein, conserved | location=Tb927_09_v4:553066-556194(-) | length=1042	1	3	Tb09.160.1210	hypothetical protein, conserved	3	7.2	113.57	1042	0.71602	11.178	-0.481928
>GeneDB|Tb927.5.1680 | organism=Trypanosoma_brucei_TREU927 | product=hypothetical protein, conserved | location=Tb927_05_v4:528937-534192(+) | length=1751	1	9	Tb927.5.1680	hypothetical protein, conserved	9	7.8	194.69	1751	0.7179	30.899	-0.478145
>GeneDB|Tb927.8.7200 | organism=Trypanosoma_brucei_TREU927 | product=hypothetical protein, conserved | location=Tb927_08_v4:2067646-2071017(+) | length=1123	1	1	Tb927.8.7200	hypothetical protein, conserved	1	2	125.33	1123	0.7183	3.9569	-0.477342
>GeneDB|Tb11.03.0080 | organism=Trypanosoma_brucei_TREU927 | product=hypothetical protein, conserved | location=Tb927_11_01_v4:263363-265297(+) | length=644	1	4	Tb11.03.0080	hypothetical protein, conserved	4	9.6	70.953	644	0.71832	31.188	-0.477301
>GeneDB|Tb11.01.0680 | organism=Trypanosoma_brucei_TREU927 | product=leucine rich repeat | location=Tb927_11_01_v4:2400412-2402553(+) | length=713	1	29	Tb11.01.0680	leucine rich repeat	29	52.2	78.96	713	0.71972	22.309	-0.474492
>GeneDB|Tb11.01.8225 | organism=Trypanosoma_brucei_TREU927 | product=hypothetical protein, conserved | location=Tb927_11_01_v4:4316545-4316985(-) | length=146	1	4	Tb11.01.8225	hypothetical protein, conserved	4	34.9	16.327	146	0.7199	155.75	-0.474132
>GeneDB|Tb11.01.6550 | organism=Trypanosoma_brucei_TREU927 | product=hypothetical protein, conserved | location=Tb927_11_01_v4:3901966-3911778(-) | length=3270	1	3	Tb11.01.6550	hypothetical protein, conserved	3	1.1	363.33	3270	0.72007	43.658	-0.473791
>GeneDB|Tb927.2.3480 | organism=Trypanosoma_brucei_TREU927 | product=hypothetical protein, conserved,transcription elongation factor s-II, putative | location=Tb927_02_v4:635631-636776(-) | length=381	1	2	Tb927.2.3480	hypothetical protein, conserved,transcription elongation factor s-II, putative	2	9.4	42.597	381	0.72009	38.297	-0.473751
>GeneDB|Tb927.3.2030 | organism=Trypanosoma_brucei_TREU927 | product=acylphosphatase, putative | location=Tb927_03_v4:527887-528219(-) | length=110	1	3	Tb927.3.2030	acylphosphatase, putative	3	33.6	12.37	110	0.7202	30.593	-0.47353
>GeneDB|Tb11.22.0003 | organism=Trypanosoma_brucei_TREU927 | product=phosphoglycerate kinase, putative | location=Tb927_11_01_v4:663970-666711(+) | length=913	1	8	Tb11.22.0003	phosphoglycerate kinase, putative	8	13.5	100.85	913	0.72034	21.592	-0.47325
>GeneDB|Tb927.7.2780 | organism=Trypanosoma_brucei_TREU927 | product=hypothetical protein, conserved | location=Tb927_07_v4:722307-722660(+) | length=117	1	6	Tb927.7.2780	hypothetical protein, conserved	6	59.8	12.723	117	0.72039	45.136	-0.47315
>GeneDB|Tb927.2.4830 | organism=Trypanosoma_brucei_TREU927 | product=TFIIF-stimulated CTD phosphatase, putative | location=Tb927_02_v4:858352-859362(-) | length=336	1	3	Tb927.2.4830	TFIIF-stimulated CTD phosphatase, putative	3	12.5	38.807	336	0.72115	67.775	-0.471629
>GeneDB|Tb927.4.2640 | organism=Trypanosoma_brucei_TREU927 | product=hypothetical protein, conserved | location=Tb927_04_v4:697918-701742(+) | length=1274	1	2	Tb927.4.2640	hypothetical protein, conserved	2	2.6	145.37	1274	0.72174	28.61	-0.470449
>GeneDB|Tb09.160.3470 | organism=Trypanosoma_brucei_TREU927 | product=condensin subunit 1, putative | location=Tb927_09_v4:836962-840738(+) | length=1258	1	8	Tb09.160.3470	condensin subunit 1, putative	8	11	141.11	1258	0.72217	48.067	-0.46959
>GeneDB|Tb927.10.14780 | organism=Trypanosoma_brucei_TREU927 | product=protein kinase, putative,mitogen-activated protein kinase kinase kinase, putative | location=Tb927_10_v5:3604785-3605639(-) | length=284	1	18	Tb927.10.14780	protein kinase, putative,mitogen-activated protein kinase kinase kinase, putative	18	77.5	31.375	284	0.72455	27.289	-0.464843
>GeneDB|Tb11.02.5520 | organism=Trypanosoma_brucei_TREU927 | product=long-chain-fatty-acid-CoA ligase, putative | location=Tb927_11_01_v4:2107360-2109543(-) | length=727	1	4	Tb11.02.5520	long-chain-fatty-acid-CoA ligase, putative	4	8.7	80.712	727	0.72488	27.046	-0.464186
>GeneDB|Tb11.01.7390 | organism=Trypanosoma_brucei_TREU927 | product=AMP deaminase, putative | location=Tb927_11_01_v4:4109851-4114104(-) | length=1417	1	7	Tb11.01.7390	AMP deaminase, putative	7	8	163.21	1417	0.72497	134.69	-0.464007
>GeneDB|Tb927.2.5270 | organism=Trypanosoma_brucei_TREU927 | product=dynein heavy chain, putative | location=Tb927_02_v4:925431-938171(+) | length=4246	1	48	Tb927.2.5270	dynein heavy chain, putative	48	16.3	485.74	4246	0.72515	39.768	-0.463649
>GeneDB|Tb11.02.4760 | organism=Trypanosoma_brucei_TREU927 | product=hypothetical protein, conserved | location=Tb927_11_01_v4:1926987-1931984(-) | length=1665	1	3	Tb11.02.4760	hypothetical protein, conserved	3	2.5	186.37	1665	0.72518	44.901	-0.463589
>GeneDB|Tb927.7.6610 | organism=Trypanosoma_brucei_TREU927 | product=hypothetical protein, conserved | location=Tb927_07_v4:1805581-1808274(-) | length=897	1	11	Tb927.7.6610	hypothetical protein, conserved	11	15.4	96.787	897	0.72638	18.462	-0.461204
>GeneDB|Tb927.2.4580 | organism=Trypanosoma_brucei_TREU927 | product=hypothetical protein, conserved | location=Tb927_02_v4:816489-817079(-) | length=196	1	8	Tb927.2.4580	hypothetical protein, conserved	8	59.7	22.66	196	0.72646	24.689	-0.461045
>GeneDB|Tb09.160.0680 | organism=Trypanosoma_brucei_TREU927 | product=sec1 family transport protein, putative | location=Tb927_09_v4:413950-415833(-) | length=627	1	9	Tb09.160.0680	sec1 family transport protein, putative	9	18.5	69.022	627	0.72658	48.965	-0.460806
>GeneDB|Tb09.211.2420 | organism=Trypanosoma_brucei_TREU927 | product=PRP8 protein homologue,U5 snRNA-associated splicing factor | location=Tb927_09_v4:1702687-1709898(-) | length=2403	1	13	Tb09.211.2420	PRP8 protein homologue,U5 snRNA-associated splicing factor	13	8.3	277	2403	0.72691	27.931	-0.460151
>GeneDB|Tb927.2.4540 | organism=Trypanosoma_brucei_TREU927 | product=Small nuclear ribonucleoprotein-associated protein B (snRNP-B) (Sm protein B) (Sm-B) (SmB), putative | location=Tb927_02_v4:807816-808145(-) | length=109	1	5	Tb927.2.4540	Small nuclear ribonucleoprotein-associated protein B (snRNP-B) (Sm protein B) (Sm-B) (SmB), putative	5	43.1	12.331	109	0.72716	35.672	-0.459655
>GeneDB|Tb927.10.1210 | organism=Trypanosoma_brucei_TREU927 | product=katanin, putative | location=Tb927_10_v5:324529-326571(-) | length=680	1	14	Tb927.10.1210	katanin, putative	14	32.6	75.358	680	0.72752	25.505	-0.458941
>GeneDB|Tb927.8.4780 | organism=Trypanosoma_brucei_TREU927 | product=hypothetical protein, conserved | location=Tb927_08_v4:1404961-1417416(-) | length=4151	1	64	Tb927.8.4780	hypothetical protein, conserved	64	33.5	468.13	4151	0.72909	37.546	-0.455831
>GeneDB|Tb09.244.2150 | organism=Trypanosoma_brucei_TREU927 | product=hypothetical protein | location=Tb927_09_v4:2460137-2460835(-) | length=232	1	2	Tb09.244.2150	hypothetical protein	2	9.5	25.1	232	0.72928	88.244	-0.455455
>GeneDB|Tb927.10.5860 | organism=Trypanosoma_brucei_TREU927 | product=hypothetical protein, conserved | location=Tb927_10_v5:1466005-1466433(-) | length=142	1	3	Tb927.10.5860	hypothetical protein, conserved	3	40.8	16.309	142	0.72984	20.966	-0.454348
>GeneDB|Tb11.01.1540 | organism=Trypanosoma_brucei_TREU927 | product=hypothetical protein, conserved | location=Tb927_11_01_v4:2590141-2593374(-) | length=1077	1	10	Tb11.01.1540	hypothetical protein, conserved	10	12.7	118.85	1077	0.73004	78.402	-0.453953
>GeneDB|Tb927.10.15760 | organism=Trypanosoma_brucei_TREU927 | product=hypothetical protein, conserved | location=Tb927_10_v5:3895573-3896520(+) | length=315	1	26	Tb927.10.15760	hypothetical protein, conserved	26	72.1	36.411	315	0.7301	88.078	-0.453834
>GeneDB|Tb927.7.760 | organism=Trypanosoma_brucei_TREU927 | product=hypothetical protein, conserved | location=Tb927_07_v4:172808-174517(-) | length=569	1	7	Tb927.7.760	hypothetical protein, conserved	7	20.9	63.497	569	0.73059	17.472	-0.452866
>GeneDB|Tb927.3.4270 | organism=Trypanosoma_brucei_TREU927 | product=hypothetical protein, conserved | location=Tb927_03_v4:1202918-1205668(-) | length=916	1	17	Tb927.3.4270	hypothetical protein, conserved	17	27	99.496	916	0.73144	32.735	-0.451189
>GeneDB|Tb11.02.4460 | organism=Trypanosoma_brucei_TREU927 | product=hypothetical protein, conserved | location=Tb927_11_01_v4:1842497-1843681(-) | length=394	1	14	Tb11.02.4460	hypothetical protein, conserved	14	51.5	43.605	394	0.73151	46.519	-0.451051
>GeneDB|Tb927.10.1890 | organism=Trypanosoma_brucei_TREU927 | product=calpain, putative,cysteine peptidase, Clan CA, family C2, putative | location=Tb927_10_v5:489021-493805(+) | length=1594	1	15	Tb927.10.1890	calpain, putative,cysteine peptidase, Clan CA, family C2, putative	15	13.7	178.09	1594	0.73202	49.507	-0.450045
>GeneDB|Tb927.7.3410 | organism=Trypanosoma_brucei_TREU927 | product=centrin, putative | location=Tb927_07_v4:887990-888439(-) | length=149	1	9	Tb927.7.3410	centrin, putative	9	76.5	16.552	149	0.73221	21.41	-0.449671
>GeneDB|Tb927.2.4780 | organism=Trypanosoma_brucei_TREU927 | product=hypothetical protein, conserved | location=Tb927_02_v4:848036-850858(-) | length=940	1	5	Tb927.2.4780	hypothetical protein, conserved	5	8	106.44	940	0.73304	38.751	-0.448036
>GeneDB|Tb927.7.4100 | organism=Trypanosoma_brucei_TREU927 | product=hypothetical protein, conserved | location=Tb927_07_v4:1086034-1087536(+) | length=500	1	3	Tb927.7.4100	hypothetical protein, conserved	3	6.2	56.72	500	0.73317	30.736	-0.44778
>GeneDB|Tb927.5.2770 | organism=Trypanosoma_brucei_TREU927 | product=hypothetical protein, conserved | location=Tb927_05_v4:876864-878087(-) | length=407	1	4	Tb927.5.2770	hypothetical protein, conserved	4	12.3	46.514	407	0.7333	18.026	-0.447525
>GeneDB|Tb927.7.2110 | organism=Trypanosoma_brucei_TREU927 | product=hypothetical protein, conserved | location=Tb927_07_v4:536547-537302(-) | length=251	1	1	Tb927.7.2110	hypothetical protein, conserved	1	8	29.286	251	0.7338	28.248	-0.446541
>GeneDB|Tb927.2.1850 | organism=Trypanosoma_brucei_TREU927 | product=hypothetical protein, conserved | location=Tb927_02_v4:345063-346475(+) | length=470	1	3	Tb927.2.1850	hypothetical protein, conserved	3	8.3	51.219	470	0.7338	18.925	-0.446541
>GeneDB|Tb11.01.4320 | organism=Trypanosoma_brucei_TREU927 | product=kinetoplastid-specific phospho-protein phosphatase, putative | location=Tb927_11_01_v4:3279272-3281185(+) | length=637	1	6	Tb11.01.4320	kinetoplastid-specific phospho-protein phosphatase, putative	6	12.4	69.817	637	0.73399	26.109	-0.446168
>GeneDB|Tb11.01.6880 | organism=Trypanosoma_brucei_TREU927 | product=cytosolic coat protein, putative | location=Tb927_11_01_v4:3984353-3985039(-) | length=228	1	6	Tb11.01.6880	cytosolic coat protein, putative	6	26.8	25.564	228	0.73399	23.321	-0.446168
>GeneDB|Tb927.10.5790 | organism=Trypanosoma_brucei_TREU927 | product=hypothetical protein, conserved | location=Tb927_10_v5:1437008-1438618(-) | length=536	1	5	Tb927.10.5790	hypothetical protein, conserved	5	12.3	59.193	536	0.73427	11.6	-0.445617
>GeneDB|Tb927.10.14340 | organism=Trypanosoma_brucei_TREU927 | product=hypothetical protein, conserved | location=Tb927_10_v5:3487971-3491492(-) | length=1173	1	9	Tb927.10.14340	hypothetical protein, conserved	9	11.2	126.88	1173	0.73492	82.991	-0.444341
>GeneDB|Tb927.8.810 | organism=Trypanosoma_brucei_TREU927 | product=radial spoke protein RSP9, putative | location=Tb927_08_v4:232134-233135(-) | length=333	1	22	Tb927.8.810	radial spoke protein RSP9, putative	22	76	37.518	333	0.73503	34.462	-0.444125
>GeneDB|Tb927.10.880 | organism=Trypanosoma_brucei_TREU927 | product=thymidine kinase, putative | location=Tb927_10_v5:235872-237239(+) | length=455	1	2	Tb927.10.880	thymidine kinase, putative	2	5.7	50.844	455	0.73511	19.337	-0.443968
>GeneDB|Tb11.03.0890 | organism=Trypanosoma_brucei_TREU927 | product=ubiquitin carboxyl-terminal hydrolase, putative,cysteine peptidase, Clan CA, family C12, putative | location=Tb927_11_01_v4:56695-57405(-) | length=236	1	4	Tb11.03.0890	ubiquitin carboxyl-terminal hydrolase, putative,cysteine peptidase, Clan CA, family C12, putative	4	22.9	25.977	236	0.73538	19.833	-0.443438
>GeneDB|Tb09.160.2860 | organism=Trypanosoma_brucei_TREU927 | product=hypothetical protein, conserved | location=Tb927_09_v4:753842-754957(+) | length=371	1	2	Tb09.160.2860	hypothetical protein, conserved	2	7.5	39.967	371	0.7362	12.127	-0.44183
>GeneDB|Tb927.3.1010 | organism=Trypanosoma_brucei_TREU927 | product=hypothetical protein, conserved | location=Tb927_03_v4:246909-248711(+) | length=600	1	31	Tb927.3.1010	hypothetical protein, conserved	31	62.2	64.339	600	0.73649	46.658	-0.441262
>GeneDB|Tb927.10.11780 | organism=Trypanosoma_brucei_TREU927 | product=hypothetical protein, conserved | location=Tb927_10_v5:2878763-2882254(+) | length=1163	1	10	Tb927.10.11780	hypothetical protein, conserved	10	11.8	131.27	1163	0.73694	28.919	-0.440381
>GeneDB|Tb927.8.2620 | organism=Trypanosoma_brucei_TREU927 | product=hypothetical protein, conserved | location=Tb927_08_v4:770953-773457(+) | length=834	1	4	Tb927.8.2620	hypothetical protein, conserved	4	6.6	92.699	834	0.73738	21.125	-0.43952
>GeneDB|Tb927.7.6910 | organism=Trypanosoma_brucei_TREU927 | product=hypothetical protein, conserved | location=Tb927_07_v4:1967907-1970378(-) | length=823	1	31	Tb927.7.6910	hypothetical protein, conserved	31	54.3	92.255	823	0.73743	40.554	-0.439422
>GeneDB|Tb09.160.1610 | organism=Trypanosoma_brucei_TREU927 | product=hypothetical protein, conserved | location=Tb927_09_v4:614073-615560(-) | length=495	1	4	Tb09.160.1610	hypothetical protein, conserved	4	10.9	54.569	495	0.73749	15.728	-0.439305
>GeneDB|Tb927.8.5060 | organism=Trypanosoma_brucei_TREU927 | product=ADP-ribosylation factor, putative,small GTPase, putative | location=Tb927_08_v4:1495996-1496565(+) | length=189	1	2	Tb927.8.5060	ADP-ribosylation factor, putative,small GTPase, putative	2	12.7	20.632	189	0.73787	27.179	-0.438561
>GeneDB|Tb927.10.10890 | organism=Trypanosoma_brucei_TREU927 | product=heat shock protein, putative | location=Tb927_10_v5:2655070-2657184(-) | length=704;>GeneDB|Tb927.10.10900 | organism=Trypanosoma_brucei_TREU927 | product=heat shock protein, putative | location=Tb927_10_v5:2657845-2659959(-) | length=704;>GeneDB|Tb927.10.10920 | organism=Trypanosoma_brucei_TREU927 | product=heat shock protein…	11	79;79;79;79;79;79;77;76;76;75;1	Tb927.10.10890	heat shock protein, putative	79	80.3	80.763	704	0.73867	32.599	-0.436998
>GeneDB|Tb11.01.3000 | organism=Trypanosoma_brucei_TREU927 | product=paraflagellar rod component, putative | location=Tb927_11_01_v4:2936510-2937592(+) | length=360	1	10	Tb11.01.3000	paraflagellar rod component, putative	10	41.7	41.94	360	0.73886	34.986	-0.436627
>GeneDB|Tb11.01.4480 | organism=Trypanosoma_brucei_TREU927 | product=hypothetical protein, conserved | location=Tb927_11_01_v4:3319278-3322202(+) | length=974	1	8	Tb11.01.4480	hypothetical protein, conserved	8	10.9	106.76	974	0.73931	106.15	-0.435749
>GeneDB|Tb927.10.14770 | organism=Trypanosoma_brucei_TREU927 | product=protein kinase, putative | location=Tb927_10_v5:3601240-3603162(-) | length=640	1	18	Tb927.10.14770	protein kinase, putative	18	36.6	70.531	640	0.73934	19.881	-0.43569
>GeneDB|Tb927.6.2150 | organism=Trypanosoma_brucei_TREU927 | product=cell division cycle protein 16, putative,cell division cycle protein 16 homolog, putative | location=Tb927_06_v4:684152-685951(-) | length=599	1	2	Tb927.6.2150	cell division cycle protein 16, putative,cell division cycle protein 16 homolog, putative	2	5.3	67.287	599	0.73983	22.51	-0.434734
>GeneDB|Tb927.6.2940 | organism=Trypanosoma_brucei_TREU927 | product=hypothetical protein, conserved | location=Tb927_06_v4:879851-880606(+) | length=251	1	7	Tb927.6.2940	hypothetical protein, conserved	7	51.4	27.586	251	0.73987	77.862	-0.434656
>GeneDB|Tb11.01.7610 | organism=Trypanosoma_brucei_TREU927 | product=hypothetical protein, conserved | location=Tb927_11_01_v4:4167905-4171045(-) | length=1046	1	10	Tb11.01.7610	hypothetical protein, conserved	10	13.9	117.09	1046	0.74011	24.105	-0.434188
>GeneDB|Tb927.6.3900 | organism=Trypanosoma_brucei_TREU927 | product=hypothetical protein, conserved | location=Tb927_06_v4:1152803-1154686(-) | length=627	1	2	Tb927.6.3900	hypothetical protein, conserved	2	5.1	68.025	627	0.74033	23.551	-0.43376
>GeneDB|Tb927.7.6460 | organism=Trypanosoma_brucei_TREU927 | product=FG-GAP repeat protein, putative,intergrin alpha chain protein, putative | location=Tb927_07_v4:1753202-1755739(+) | length=845	1	7	Tb927.7.6460	FG-GAP repeat protein, putative,intergrin alpha chain protein, putative	7	12.7	92.145	845	0.74044	32.072	-0.433545
>GeneDB|Tb927.10.8890 | organism=Trypanosoma_brucei_TREU927 | product=kinetoplast DNA-associated protein, putative | location=Tb927_10_v5:2199362-2199991(+) | length=209	1	5	Tb927.10.8890	kinetoplast DNA-associated protein, putative	5	23	23.503	209	0.74081	19.233	-0.432825
>GeneDB|Tb09.160.3630 | organism=Trypanosoma_brucei_TREU927 | product=cAMP-specific phosphodiesterase | location=Tb927_09_v4:857727-860504(+) | length=925	1	17	Tb09.160.3630	cAMP-specific phosphodiesterase	17	28.3	103.22	925	0.74082	54.936	-0.432805
>GeneDB|Tb927.5.4480 | organism=Trypanosoma_brucei_TREU927 | product=paraflagellar rod component par4, putative | location=Tb927_05_v4:1323652-1325391(-) | length=579;>REV_GeneDB|Tb11.50.0004 Reverse sequence, was | organism=Trypanosoma_brucei_TREU927 | product=hypothetical protein, conserved | location=Tb927_11_01_v4:166592-168724(-) | length=710	2	37;0	Tb927.5.4480	paraflagellar rod component par4, putative	37	62.2	68.313	579	0.74103	41.86	-0.432396
>GeneDB|Tb927.2.5980 | organism=Trypanosoma_brucei_TREU927 | product=ATP-dependent Clp protease subunit, heat shock protein 100 (HSP100), putative,serine peptidase, putative | location=Tb927_02_v4:1084458-1087070(+) | length=870;>REV_CON_Q2KJ83 Reverse sequence, was (Bos taurus) Similar to Carboxypeptidase N catalytic chain;>REV_GeneDB|Tb927.10.10720 Reverse sequence, was | organism=Trypanosoma_b…	3	50;1;1	Tb927.2.5980	ATP-dependent Clp protease subunit, heat shock protein 100 (HSP100), putative,serine peptidase, putative	50	63.6	97.037	870	0.74136	19.86	-0.431754
>GeneDB|Tb09.244.2620 | organism=Trypanosoma_brucei_TREU927 | product=NADH-ubiquinone oxidoreductase complex I subunit, putative,NDUFA9 subunit, putative | location=Tb927_09_v4:2333052-2334173(+) | length=373	1	2	Tb09.244.2620	NADH-ubiquinone oxidoreductase complex I subunit, putative,NDUFA9 subunit, putative	2	10.7	42.585	373	0.74166	103.32	-0.43117
>GeneDB|Tb11.02.5020 | organism=Trypanosoma_brucei_TREU927 | product=seryl-tRNA synthetase, putative | location=Tb927_11_01_v4:1982137-1983576(-) | length=479	1	37	Tb11.02.5020	seryl-tRNA synthetase, putative	37	84.3	53.857	479	0.74191	194.7	-0.430684
>GeneDB|Tb927.10.13720 | organism=Trypanosoma_brucei_TREU927 | product=RNA-binding protein, putative | location=Tb927_10_v5:3351806-3352939(-) | length=377	1	14	Tb927.10.13720	RNA-binding protein, putative	14	31.6	40.678	377	0.74205	19.703	-0.430412
>GeneDB|Tb11.01.1440 | organism=Trypanosoma_brucei_TREU927 | product=glycine synthase, putative;with=GeneDB:LinJ36_V3.3990 | location=Tb927_11_01_v4:2573794-2574921(-) | length=375	1	8	Tb11.01.1440	glycine synthase, putative;with=GeneDB:LinJ36_V3.3990	8	30.4	41.142	375	0.7427	27.173	-0.429149
>GeneDB|Tb927.7.3740 | organism=Trypanosoma_brucei_TREU927 | product=hypothetical protein, conserved | location=Tb927_07_v4:979105-981654(-) | length=849	1	39	Tb927.7.3740	hypothetical protein, conserved	39	58	93.25	849	0.74343	38.636	-0.427731
>GeneDB|Tb09.211.4170 | organism=Trypanosoma_brucei_TREU927 | product=hypothetical protein, conserved | location=Tb927_09_v4:2048758-2050281(-) | length=507	1	9	Tb09.211.4170	hypothetical protein, conserved	9	25.6	55.399	507	0.74362	57.044	-0.427363
>GeneDB|Tb927.6.4520 | organism=Trypanosoma_brucei_TREU927 | product=hypothetical protein, conserved | location=Tb927_06_v4:1265587-1266897(-) | length=436	1	16	Tb927.6.4520	hypothetical protein, conserved	16	39	52.589	436	0.74383	87.881	-0.426955
>GeneDB|Tb927.8.2720 | organism=Trypanosoma_brucei_TREU927 | product=hypothetical protein, conserved | location=Tb927_08_v4:806882-808123(+) | length=413	1	1	Tb927.8.2720	hypothetical protein, conserved	1	5.1	45.091	413	0.74423	13.099	-0.42618
>GeneDB|Tb11.01.3070 | organism=Trypanosoma_brucei_TREU927 | product=hypothetical protein, conserved | location=Tb927_11_01_v4:2959341-2962463(+) | length=1040	1	8	Tb11.01.3070	hypothetical protein, conserved	8	10.1	120.86	1040	0.74445	23.408	-0.425753
>GeneDB|Tb927.4.2140 | organism=Trypanosoma_brucei_TREU927 | product=MBO2,flagellar component | location=Tb927_04_v4:553424-556426(+) | length=1000	1	6	Tb927.4.2140	MBO2,flagellar component	6	8.5	114.76	1000	0.74457	14.704	-0.425521
>GeneDB|Tb927.10.2270 | organism=Trypanosoma_brucei_TREU927 | product=vacuolar protein sorting-associated protein 35, putative | location=Tb927_10_v5:587863-590664(+) | length=933	1	22	Tb927.10.2270	vacuolar protein sorting-associated protein 35, putative	22	34.3	104.36	933	0.74464	41.309	-0.425385
>GeneDB|Tb927.10.4690 | organism=Trypanosoma_brucei_TREU927 | product=dynein light chain, putative | location=Tb927_10_v5:1185611-1185949(-) | length=112	1	4	Tb927.10.4690	dynein light chain, putative	4	50.9	13.029	112	0.74505	43.769	-0.424591
>GeneDB|Tb927.6.1720 | organism=Trypanosoma_brucei_TREU927 | product=hypothetical protein, conserved | location=Tb927_06_v4:574554-576848(-) | length=764	1	3	Tb927.6.1720	hypothetical protein, conserved	3	6.8	82.444	764	0.74513	7.7085	-0.424436
>GeneDB|Tb927.2.4060 | organism=Trypanosoma_brucei_TREU927 | product=dynein intermediate chain IC 138, putative | location=Tb927_02_v4:715618-718212(-) | length=864	1	11	Tb927.2.4060	dynein intermediate chain IC 138, putative	11	15.9	94.636	864	0.74522	90.236	-0.424262
>GeneDB|Tb927.7.2660 | organism=Trypanosoma_brucei_TREU927 | product=hypothetical protein, conserved,zinc finger protein family member, putative | location=Tb927_07_v4:688131-689348(-) | length=405	1	3	Tb927.7.2660	hypothetical protein, conserved,zinc finger protein family member, putative	3	9.4	43.757	405	0.74537	36.594	-0.423971
>GeneDB|Tb927.3.2280 | organism=Trypanosoma_brucei_TREU927 | product=vacuolar sorting protein 33 , putative | location=Tb927_03_v4:589443-591236(+) | length=597	1	3	Tb927.3.2280	vacuolar sorting protein 33 , putative	3	8.5	66.938	597	0.74577	24.535	-0.423197
>GeneDB|Tb927.10.7230 | organism=Trypanosoma_brucei_TREU927 | product=hypothetical protein, conserved | location=Tb927_10_v5:1818813-1826378(-) | length=2521;REV__>REV_GeneDB|Tb927.8.8200 Reverse sequence, was | organism=Trypanosoma_brucei_TREU927 | product=hypothetical protein, conserved | location=Tb927_08_v4:2426272-2428842(+) | length=856	2	65;0	Tb927.10.7230	hypothetical protein, conserved	65	33.4	284.7	2521	0.74596	38.402	-0.42283
>GeneDB|Tb927.10.7130 | organism=Trypanosoma_brucei_TREU927 | product=hypothetical protein, conserved | location=Tb927_10_v5:1795463-1797703(+) | length=746	1	7	Tb927.10.7130	hypothetical protein, conserved	7	13.5	83.021	746	0.7465	16.295	-0.421786
>GeneDB|Tb927.10.13010 | organism=Trypanosoma_brucei_TREU927 | product=protein kinase A catalytic subunit | location=Tb927_10_v5:3160717-3161730(-) | length=337	1	2	Tb927.10.13010	protein kinase A catalytic subunit	2	5.9	39.183	337	0.74659	2.9417	-0.421612
>GeneDB|Tb927.10.5400 | organism=Trypanosoma_brucei_TREU927 | product=hypothetical protein, conserved | location=Tb927_10_v5:1359987-1361711(+) | length=574	1	10	Tb927.10.5400	hypothetical protein, conserved	10	26.5	63.396	574	0.74694	27.947	-0.420936
>GeneDB|Tb927.4.870 | organism=Trypanosoma_brucei_TREU927 | product=dynein heavy chain, putative | location=Tb927_04_v4:238354-252153(-) | length=4448	1	63	Tb927.4.870	dynein heavy chain, putative	63	20.2	510.1	4448	0.74708	33.886	-0.420665
>GeneDB|Tb927.7.1420 | organism=Trypanosoma_brucei_TREU927 | product=hypothetical protein, conserved | location=Tb927_07_v4:359796-364544(+) | length=1582	1	2	Tb927.7.1420	hypothetical protein, conserved	2	1.9	173.93	1582	0.74846	57.429	-0.418003
>GeneDB|Tb927.8.8050 | organism=Trypanosoma_brucei_TREU927 | product=Nucleoporin | location=Tb927_08_v4:2384504-2386723(+) | length=739	1	2	Tb927.8.8050	Nucleoporin	2	6.2	74.823	739	0.7489	23.532	-0.417155
>GeneDB|Tb927.7.4020 | organism=Trypanosoma_brucei_TREU927 | product=protein phosphatase 2C, putative | location=Tb927_07_v4:1062389-1064629(+) | length=746	1	6	Tb927.7.4020	protein phosphatase 2C, putative	6	14.5	78.079	746	0.74924	14.285	-0.4165
>GeneDB|Tb927.6.840 | organism=Trypanosoma_brucei_TREU927 | product=hypothetical protein, conserved | location=Tb927_06_v4:358077-359132(-) | length=351	1	5	Tb927.6.840	hypothetical protein, conserved	5	23.6	38.157	351	0.74936	57.823	-0.416269
>GeneDB|Tb927.8.6920 | organism=Trypanosoma_brucei_TREU927 | product=hypothetical protein, conserved | location=Tb927_08_v4:1994082-1994876(-) | length=264	1	5	Tb927.8.6920	hypothetical protein, conserved	5	28.4	29.545	264	0.75072	23.646	-0.413653
>GeneDB|Tb927.4.1720 | organism=Trypanosoma_brucei_TREU927 | product=nucleoside diphosphate kinase, putative | location=Tb927_04_v4:438589-439638(-) | length=349	1	8	Tb927.4.1720	nucleoside diphosphate kinase, putative	8	28.7	38.948	349	0.75102	20.214	-0.413077
>GeneDB|Tb927.8.5580 | organism=Trypanosoma_brucei_TREU927 | product=hypothetical protein, conserved | location=Tb927_08_v4:1644049-1658481(+) | length=4810	1	13	Tb927.8.5580	hypothetical protein, conserved	13	4.8	526.41	4810	0.75114	27.486	-0.412846
>GeneDB|Tb927.7.1430 | organism=Trypanosoma_brucei_TREU927 | product=hypothetical protein, conserved,leucine-rich repeat protein (LRRP), putative | location=Tb927_07_v4:366013-367359(+) | length=448	1	9	Tb927.7.1430	hypothetical protein, conserved,leucine-rich repeat protein (LRRP), putative	9	25.9	47.759	448	0.75271	63.384	-0.409834
>GeneDB|Tb927.7.4440 | organism=Trypanosoma_brucei_TREU927 | product=hypothetical protein, conserved | location=Tb927_07_v4:1178392-1179270(-) | length=292	1	2	Tb927.7.4440	hypothetical protein, conserved	2	18.8	31.573	292	0.75325	13.547	-0.408799
>GeneDB|Tb927.10.4040 | organism=Trypanosoma_brucei_TREU927 | product=3-keto-dihydrosphingosine reductase | location=Tb927_10_v5:1063800-1064846(-) | length=348	1	12	Tb927.10.4040	3-keto-dihydrosphingosine reductase	12	39.9	38.045	348	0.75328	27.001	-0.408742
>GeneDB|Tb09.211.4511 | organism=Trypanosoma_brucei_TREU927 | product=kinetoplastid membrane protein KMP-11 | location=Tb927_09_v4:2126882-2127160(-) | length=92;>GeneDB|Tb09.211.4512 | organism=Trypanosoma_brucei_TREU927 | product=kinetoplastid membrane protein KMP-11 | location=Tb927_09_v4:2127475-2127753(-) | length=92;>GeneDB|Tb09.211.4513 | organism=Trypanosoma_brucei_TREU927 | product=kinet…	3	20;20;20	Tb09.211.4511	kinetoplastid membrane protein KMP-11	20	98.9	11.076	92	0.75348	41.453	-0.408359
>GeneDB|Tb927.7.5490 | organism=Trypanosoma_brucei_TREU927 | product=arginine N-methyltransferase, type III | location=Tb927_07_v4:1481945-1483117(+) | length=390	1	5	Tb927.7.5490	arginine N-methyltransferase, type III	5	16.2	44.026	390	0.75391	18.917	-0.407536
>GeneDB|Tb927.8.3250 | organism=Trypanosoma_brucei_TREU927 | product=dynein heavy chain, putative | location=Tb927_08_v4:967385-981409(+) | length=4674	1	55	Tb927.8.3250	dynein heavy chain, putative	55	15.8	537.36	4674	0.75469	41.215	-0.406044
>GeneDB|Tb11.02.0120 | organism=Trypanosoma_brucei_TREU927 | product=UDP-N-acetylglucosamine pyrophosphorylase, putative | location=Tb927_11_01_v4:722923-724560(-) | length=545	1	13	Tb11.02.0120	UDP-N-acetylglucosamine pyrophosphorylase, putative	13	33.9	60.161	545	0.75521	26.185	-0.40505
>GeneDB|Tb11.52.0002 | organism=Trypanosoma_brucei_TREU927 | product=hypothetical protein, conserved | location=Tb927_11_01_v4:3367701-3379592(-) | length=3963	1	6	Tb11.52.0002	hypothetical protein, conserved	6	2.8	434.42	3963	0.75527	22.353	-0.404936
>GeneDB|Tb927.10.6820 | organism=Trypanosoma_brucei_TREU927 | product=hypothetical protein, conserved | location=Tb927_10_v5:1718893-1719837(+) | length=314	1	6	Tb927.10.6820	hypothetical protein, conserved	6	24.8	34.82	314	0.75531	23.72	-0.404859
>GeneDB|Tb927.10.5040 | organism=Trypanosoma_brucei_TREU927 | product=chaperone protein DNAj, putative | location=Tb927_10_v5:1247618-1248490(+) | length=290	1	8	Tb927.10.5040	chaperone protein DNAj, putative	8	46.2	30.863	290	0.75538	17.89	-0.404726
>GeneDB|Tb11.01.4650 | organism=Trypanosoma_brucei_TREU927 | product=hypothetical protein, conserved | location=Tb927_11_01_v4:3434147-3435727(-) | length=526	1	3	Tb11.01.4650	hypothetical protein, conserved	3	11.2	54.147	526	0.75553	132.47	-0.404439
>GeneDB|Tb927.3.1280 | organism=Trypanosoma_brucei_TREU927 | product=hypothetical protein, conserved | location=Tb927_03_v4:315020-316522(+) | length=500	1	6	Tb927.3.1280	hypothetical protein, conserved	6	21	56.439	500	0.75614	22.396	-0.403275
>GeneDB|Tb11.02.3880 | organism=Trypanosoma_brucei_TREU927 | product=hypothetical protein, conserved | location=Tb927_11_01_v4:1684171-1689294(-) | length=1707	1	6	Tb11.02.3880	hypothetical protein, conserved	6	6.4	189.56	1707	0.75658	33.79	-0.402435
>GeneDB|Tb927.10.3900 | organism=Trypanosoma_brucei_TREU927 | product=protein kinase, putative | location=Tb927_10_v5:1032902-1035124(-) | length=740	1	8	Tb927.10.3900	protein kinase, putative	8	13.2	83.218	740	0.75707	22.121	-0.401501
>GeneDB|Tb09.211.1400 | organism=Trypanosoma_brucei_TREU927 | product=MCAK-like kinesin, putative | location=Tb927_09_v4:1514294-1515742(-) | length=482	1	11	Tb09.211.1400	MCAK-like kinesin, putative	11	28.8	53.501	482	0.75716	29.842	-0.40133
>GeneDB|Tb11.01.0980 | organism=Trypanosoma_brucei_TREU927 | product=hypothetical protein, conserved (pseudogene) | location=Tb927_11_01_v4:2478882-2484590(+) | length=1902	1	2	Tb11.01.0980	hypothetical protein, conserved (pseudogene)	2	1.3	205.68	1902	0.75729	15.764	-0.401082
>GeneDB|Tb927.4.2600 | organism=Trypanosoma_brucei_TREU927 | product=hypothetical protein, conserved | location=Tb927_04_v4:687074-691960(+) | length=1628	1	12	Tb927.4.2600	hypothetical protein, conserved	12	12.4	181.38	1628	0.75795	20.823	-0.399825
>GeneDB|Tb927.10.10460 | organism=Trypanosoma_brucei_TREU927 | product=histone H2B, putative | location=Tb927_10_v5:2572215-2572553(-) | length=112;>GeneDB|Tb927.10.10470 | organism=Trypanosoma_brucei_TREU927 | product=histone H2B, putative | location=Tb927_10_v5:2573123-2573461(-) | length=112;>GeneDB|Tb927.10.10480 | organism=Trypanosoma_brucei_TREU927 | product=histone H2B, putative | location…	14	9;9;9;9;9;9;9;9;9;9;9;9;9;9	Tb927.10.10460	histone H2B, putative	9	64.3	12.569	112	0.75814	32.385	-0.399464
>GeneDB|Tb09.160.4710 | organism=Trypanosoma_brucei_TREU927 | product=hypothetical protein, conserved | location=Tb927_09_v4:1010359-1014921(+) | length=1520	1	11	Tb09.160.4710	hypothetical protein, conserved	11	13	170.34	1520	0.7582	46.759	-0.39935
>GeneDB|Tb09.211.3770 | organism=Trypanosoma_brucei_TREU927 | product=dynein light chain, putative,dynein Tctex2 family, putative | location=Tb927_09_v4:1975817-1976191(+) | length=124	1	4	Tb09.211.3770	dynein light chain, putative,dynein Tctex2 family, putative	4	28.2	14.653	124	0.75896	24.151	-0.397904
>GeneDB|Tb927.8.5330 | organism=Trypanosoma_brucei_TREU927 | product=tyrosyl/methionyl-tRNA synthetase, putative | location=Tb927_08_v4:1584470-1585141(+) | length=223	1	13	Tb927.8.5330	tyrosyl/methionyl-tRNA synthetase, putative	13	66.8	24.204	223	0.75919	22.49	-0.397467
>GeneDB|Tb927.2.4520 | organism=Trypanosoma_brucei_TREU927 | product=hypothetical protein, conserved | location=Tb927_02_v4:801503-805267(-) | length=1254	1	14	Tb927.2.4520	hypothetical protein, conserved	14	15.9	143.93	1254	0.75987	35.404	-0.396175
>GeneDB|Tb927.6.2720 | organism=Trypanosoma_brucei_TREU927 | product=calcium-binding protein, putative | location=Tb927_06_v4:815953-817032(+) | length=359	1	8	Tb927.6.2720	calcium-binding protein, putative	8	25.9	41.657	359	0.76018	30.594	-0.395587
>GeneDB|Tb11.01.3390 | organism=Trypanosoma_brucei_TREU927 | product=DNA topoisomerase II, putative | location=Tb927_11_01_v4:3033934-3038208(+) | length=1424	1	17	Tb11.01.3390	DNA topoisomerase II, putative	17	13.6	162.71	1424	0.76039	78.077	-0.395189
>GeneDB|Tb09.160.2070 | organism=Trypanosoma_brucei_TREU927 | product=cyclophilin type peptidyl-prolyl cis-trans isomerase, putative | location=Tb927_09_v4:657531-658487(+) | length=318	1	6	Tb09.160.2070	cyclophilin type peptidyl-prolyl cis-trans isomerase, putative	6	24.2	35.78	318	0.76078	12.352	-0.394449
>GeneDB|Tb927.7.1110 | organism=Trypanosoma_brucei_TREU927 | product=asparagine synthetase a, putative | location=Tb927_07_v4:288012-289067(+) | length=351	1	21	Tb927.7.1110	asparagine synthetase a, putative	21	63.8	39.597	351	0.76117	30.084	-0.393709
>GeneDB|Tb927.10.12180 | organism=Trypanosoma_brucei_TREU927 | product=hypothetical protein, conserved | location=Tb927_10_v5:2966690-2968798(+) | length=702	1	12	Tb927.10.12180	hypothetical protein, conserved	12	20.7	77.894	702	0.76122	23.197	-0.393615
>GeneDB|Tb927.10.7740 | organism=Trypanosoma_brucei_TREU927 | product=protein transport protein Sec23 | location=Tb927_10_v5:1945783-1948017(-) | length=744	1	11	Tb927.10.7740	protein transport protein Sec23	11	22.6	83.308	744	0.76138	24.008	-0.393311
>GeneDB|Tb927.5.4170 | organism=Trypanosoma_brucei_TREU927 | product=histone H4, putative | location=Tb927_05_v4:1271023-1271325(-) | length=100;>GeneDB|Tb927.5.4180 | organism=Trypanosoma_brucei_TREU927 | product=histone H4, putative | location=Tb927_05_v4:1271759-1272061(-) | length=100;>GeneDB|Tb927.5.4190 | organism=Trypanosoma_brucei_TREU927 | product=histone H4, putative | location=Tb927_05…	10	9;9;9;9;9;9;9;9;9;9	Tb927.5.4170	histone H4, putative	9	47	11.142	100	0.76145	26.5	-0.393179
>GeneDB|Tb927.8.5830 | organism=Trypanosoma_brucei_TREU927 | product=hypothetical protein, conserved | location=Tb927_08_v4:1713778-1714812(+) | length=344	1	8	Tb927.8.5830	hypothetical protein, conserved	8	52.3	36.561	344	0.76316	24.51	-0.389943
>GeneDB|Tb11.01.0320 | organism=Trypanosoma_brucei_TREU927 | product=hypothetical protein, conserved | location=Tb927_11_01_v4:2256203-2257396(+) | length=397	1	5	Tb11.01.0320	hypothetical protein, conserved	5	16.6	45.976	397	0.76412	15.432	-0.388129
>GeneDB|Tb927.4.620 | organism=Trypanosoma_brucei_TREU927 | product=hypothetical protein, conserved | location=Tb927_04_v4:175934-183445(-) | length=2503	1	5	Tb927.4.620	hypothetical protein, conserved	5	3.2	276.14	2503	0.76436	41.116	-0.387676
>GeneDB|Tb927.10.11510 | organism=Trypanosoma_brucei_TREU927 | product=hypothetical protein, conserved | location=Tb927_10_v5:2808278-2809348(+) | length=356	1	3	Tb927.10.11510	hypothetical protein, conserved	3	10.7	39.167	356	0.76474	6.9449	-0.386959
>GeneDB|Tb927.10.4270 | organism=Trypanosoma_brucei_TREU927 | product=coatomer zeta subunit, putative,cytosolic coat protein, putative | location=Tb927_10_v5:1115425-1115976(+) | length=183	1	4	Tb927.10.4270	coatomer zeta subunit, putative,cytosolic coat protein, putative	4	24	20.568	183	0.76549	46.358	-0.385545
>GeneDB|Tb11.02.0860 | organism=Trypanosoma_brucei_TREU927 | product=hypothetical protein, conserved | location=Tb927_11_01_v4:965892-968621(+) | length=909	1	18	Tb11.02.0860	hypothetical protein, conserved	18	27	102.85	909	0.76574	29.418	-0.385073
>GeneDB|Tb11.01.8330 | organism=Trypanosoma_brucei_TREU927 | product=hypothetical protein, conserved | location=Tb927_11_01_v4:4351475-4353325(-) | length=616	1	10	Tb11.01.8330	hypothetical protein, conserved	10	21.4	66.988	616	0.76576	25.501	-0.385036
>GeneDB|Tb11.01.7550 | organism=Trypanosoma_brucei_TREU927 | product=iron superoxide dismutase | location=Tb927_11_01_v4:4152825-4153421(-) | length=198	1	3	Tb11.01.7550	iron superoxide dismutase	3	22.7	22.048	198	0.76584	24.503	-0.384885
>GeneDB|Tb927.5.960 | organism=Trypanosoma_brucei_TREU927 | product=hypothetical protein, conserved | location=Tb927_05_v4:323099-324106(+) | length=335	1	6	Tb927.5.960	hypothetical protein, conserved	6	22.1	37.159	335	0.76792	33.174	-0.380972
>GeneDB|Tb09.160.2540 | organism=Trypanosoma_brucei_TREU927 | product=alpha/beta-hydrolase-like protein | location=Tb927_09_v4:717921-718535(+) | length=204;>GeneDB|Tb09.160.2600 | organism=Trypanosoma_brucei_TREU927 | product=alpha/beta-hydrolase-like protein | location=Tb927_09_v4:724408-725022(+) | length=204	2	5;5	Tb09.160.2540	alpha/beta-hydrolase-like protein	5	32.4	22.391	204	0.76838	17.996	-0.380108
>GeneDB|Tb927.10.14200 | organism=Trypanosoma_brucei_TREU927 | product=syntaxin 5 | location=Tb927_10_v5:3448097-3449080(-) | length=327	1	5	Tb927.10.14200	syntaxin 5	5	17.1	37.294	327	0.76857	30.503	-0.379751
>GeneDB|Tb11.03.0530 | organism=Trypanosoma_brucei_TREU927 | product=hypothetical protein SCD6.10 | location=Tb927_11_01_v4:140343-141185(-) | length=280	1	23	Tb11.03.0530	hypothetical protein SCD6.10	23	69.6	31.292	280	0.76904	22.976	-0.378869
>GeneDB|Tb927.8.690 | organism=Trypanosoma_brucei_TREU927 | product=peptidyl-prolyl cis-trans isomerase/rotamase, putative,PPIase, putative | location=Tb927_08_v4:190426-190773(-) | length=115;>REV_GeneDB|Tb11.15.0001 Reverse sequence, was | organism=Trypanosoma_brucei_TREU927 | product=variant surface glycoprotein (VSG, pseudogene), putative,variant surface glycoprotein (VSG), degenerate | locat…	2	7;1	Tb927.8.690	peptidyl-prolyl cis-trans isomerase/rotamase, putative,PPIase, putative	7	78.3	12.498	115	0.77038	31.785	-0.376358
>GeneDB|Tb11.01.0700 | organism=Trypanosoma_brucei_TREU927 | product=ribose 5-phosphate isomerase, putative | location=Tb927_11_01_v4:2408554-2409021(+) | length=155	1	12	Tb11.01.0700	ribose 5-phosphate isomerase, putative	12	89	16.957	155	0.77046	22.411	-0.376208
>GeneDB|Tb927.10.10850 | organism=Trypanosoma_brucei_TREU927 | product=argonaute-like protein | location=Tb927_10_v5:2635529-2638240(-) | length=903	1	45	Tb927.10.10850	argonaute-like protein	45	55.7	99.184	903	0.77099	43.583	-0.375216
>GeneDB|Tb927.7.7100 | organism=Trypanosoma_brucei_TREU927 | product=hypothetical protein | location=Tb927_07_v4:2028692-2032468(-) | length=1258	1	2	Tb927.7.7100	hypothetical protein	2	3.4	136.13	1258	0.77101	27.145	-0.375179
>GeneDB|Tb927.3.1670 | organism=Trypanosoma_brucei_TREU927 | product=hypothetical protein, conserved | location=Tb927_03_v4:439329-442412(-) | length=1027	1	17	Tb927.3.1670	hypothetical protein, conserved	17	23.3	112.56	1027	0.77134	21.934	-0.374561
>GeneDB|Tb11.02.4230 | organism=Trypanosoma_brucei_TREU927 | product=hypothetical protein, conserved,leucine-rich repeat protein (LRRP), putative | location=Tb927_11_01_v4:1766863-1769502(-) | length=879	1	25	Tb11.02.4230	hypothetical protein, conserved,leucine-rich repeat protein (LRRP), putative	25	46.4	95.767	879	0.77229	34.697	-0.372785
>GeneDB|Tb927.10.540 | organism=Trypanosoma_brucei_TREU927 | product=ATP-dependent DEAD/H RNA helicase, putative,DEAD box RNA helicase, putative | location=Tb927_10_v5:140816-142126(+) | length=436;REV__>REV_GeneDB|Tb927.8.3830 Reverse sequence, was | organism=Trypanosoma_brucei_TREU927 | product=ATP-dependent DEAD/H RNA helicase, putative,mitochondrial | location=Tb927_08_v4:1140004-1142241(-) |…	2	33;1	Tb927.10.540	ATP-dependent DEAD/H RNA helicase, putative,DEAD box RNA helicase, putative	33	73.4	49.226	436	0.77249	22.167	-0.372412
>GeneDB|Tb927.8.4770 | organism=Trypanosoma_brucei_TREU927 | product=small GTP-binding protein Rab18 | location=Tb927_08_v4:1404163-1404810(-) | length=215	1	4	Tb927.8.4770	small GTP-binding protein Rab18	4	22.3	23.467	215	0.77287	29.429	-0.371702
>GeneDB|Tb927.3.5350 | organism=Trypanosoma_brucei_TREU927 | product=hypothetical protein, conserved | location=Tb927_03_v4:1500815-1501132(+) | length=105	1	3	Tb927.3.5350	hypothetical protein, conserved	3	18.1	11.599	105	0.77293	26.417	-0.37159
>GeneDB|Tb927.5.1210 | organism=Trypanosoma_brucei_TREU927 | product=short-chain dehydrogenase, putative | location=Tb927_05_v4:404983-405918(+) | length=311	1	19	Tb927.5.1210	short-chain dehydrogenase, putative	19	64.6	33.876	311	0.77317	33.301	-0.371142
>GeneDB|Tb927.10.14560 | organism=Trypanosoma_brucei_TREU927 | product=hypothetical protein, conserved | location=Tb927_10_v5:3568311-3570320(-) | length=669	1	2	Tb927.10.14560	hypothetical protein, conserved	2	6.7	75.126	669	0.77376	1.6916	-0.370042
>GeneDB|Tb927.8.1840 | organism=Trypanosoma_brucei_TREU927 | product=hypothetical protein, conserved | location=Tb927_08_v4:597586-603777(-) | length=2063	1	24	Tb927.8.1840	hypothetical protein, conserved	24	15.9	225.88	2063	0.77393	34.43	-0.369725
>GeneDB|Tb927.10.2610 | organism=Trypanosoma_brucei_TREU927 | product=hypothetical protein, conserved | location=Tb927_10_v5:675104-676558(+) | length=484	1	4	Tb927.10.2610	hypothetical protein, conserved	4	15.7	54.358	484	0.77502	27.495	-0.367695
>GeneDB|Tb11.02.0790 | organism=Trypanosoma_brucei_TREU927 | product=kinesin, putative,MCAK-like kinesin, putative | location=Tb927_11_01_v4:931548-933707(+) | length=719	1	14	Tb11.02.0790	kinesin, putative,MCAK-like kinesin, putative	14	30.9	80.07	719	0.77525	16.863	-0.367266
>GeneDB|Tb927.3.3580 | organism=Trypanosoma_brucei_TREU927 | product=lipophosphoglycan biosynthetic protein, putative | location=Tb927_03_v4:1006678-1008999(+) | length=773;REV__>GeneDB|Tb11.57.0036 | organism=Trypanosoma_brucei_TREU927 | product=expression site-associated gene (ESAG, pseudogene), putative,expression site-associated gene 3 (ESAG3), degenerate and frameshifted | location=Tb927_11_…	4	41;1;1;1	Tb927.3.3580	lipophosphoglycan biosynthetic protein, putative	41	49.8	87.766	773	0.77544	23.722	-0.366913
>GeneDB|Tb11.02.0350 | organism=Trypanosoma_brucei_TREU927 | product=hypothetical protein, conserved | location=Tb927_11_01_v4:787109-788530(-) | length=473;REV__>GeneDB|Tb927.10.6910 | organism=Trypanosoma_brucei_TREU927 | product=Sterol methyltransferase, putative | location=Tb927_10_v5:1738418-1739497(+) | length=359;REV__>GeneDB|Tb927.10.6950 | organism=Trypanosoma_brucei_TREU927 | product=st…	3	16;0;0	Tb11.02.0350	hypothetical protein, conserved	16	64.5	52.991	473	0.7756	23.402	-0.366615
>GeneDB|Tb927.6.5030 | organism=Trypanosoma_brucei_TREU927 | product=hypothetical protein, conserved,leucine-rich repeat protein (LRRP), putative | location=Tb927_06_v4:1378650-1380308(+) | length=552	1	9	Tb927.6.5030	hypothetical protein, conserved,leucine-rich repeat protein (LRRP), putative	9	27.7	64.845	552	0.77582	13.241	-0.366206
>GeneDB|Tb927.7.6280 | organism=Trypanosoma_brucei_TREU927 | product=hypothetical protein, conserved | location=Tb927_07_v4:1699638-1701560(-) | length=640	1	6	Tb927.7.6280	hypothetical protein, conserved	6	12.2	72.053	640	0.77598	30.893	-0.365909
>GeneDB|Tb927.7.3330 | organism=Trypanosoma_brucei_TREU927 | product=hypothetical protein, conserved | location=Tb927_07_v4:859312-872316(-) | length=4334	1	47	Tb927.7.3330	hypothetical protein, conserved	47	53.6	502.65	4334	0.77671	35.24	-0.364552
>GeneDB|Tb11.01.0390 | organism=Trypanosoma_brucei_TREU927 | product=dynein heavy chain, putative | location=Tb927_11_01_v4:2225207-2237665(+) | length=4152	1	48	Tb11.01.0390	dynein heavy chain, putative	48	17.1	473.83	4152	0.77689	30.108	-0.364218
>GeneDB|Tb11.01.7770 | organism=Trypanosoma_brucei_TREU927 | product=FG-GAP repeat protein, putative,intergrin alpha chain protein, putative | location=Tb927_11_01_v4:4207528-4209639(-) | length=703	1	5	Tb11.01.7770	FG-GAP repeat protein, putative,intergrin alpha chain protein, putative	5	11.2	78.001	703	0.77745	94.235	-0.363178
>GeneDB|Tb927.10.11020 | organism=Trypanosoma_brucei_TREU927 | product=DNA mismatch repair protein, putative,MSH2 | location=Tb927_10_v5:2689374-2692229(-) | length=951	1	9	Tb927.10.11020	DNA mismatch repair protein, putative,MSH2	9	15.8	105.34	951	0.77858	31.501	-0.361083
>GeneDB|Tb927.10.14570 | organism=Trypanosoma_brucei_TREU927 | product=hypothetical protein, conserved | location=Tb927_10_v5:3570686-3572842(-) | length=718	1	14	Tb927.10.14570	hypothetical protein, conserved	14	27.6	81.138	718	0.77874	22.204	-0.360786
>GeneDB|Tb927.8.4460 | organism=Trypanosoma_brucei_TREU927 | product=hypothetical protein, conserved | location=Tb927_08_v4:1321193-1324222(-) | length=1009	1	9	Tb927.8.4460	hypothetical protein, conserved	9	15.2	109.59	1009	0.77921	19.975	-0.359916
>GeneDB|Tb09.211.2560 | organism=Trypanosoma_brucei_TREU927 | product=nucleoside diphosphate kinase, putative | location=Tb927_09_v4:1727690-1728694(+) | length=334	1	8	Tb09.211.2560	nucleoside diphosphate kinase, putative	8	37.1	37.106	334	0.77998	16.857	-0.358491
>GeneDB|Tb927.10.6160 | organism=Trypanosoma_brucei_TREU927 | product=hypothetical protein, conserved | location=Tb927_10_v5:1559732-1561927(-) | length=731	1	3	Tb927.10.6160	hypothetical protein, conserved	3	6.4	81.54	731	0.78001	69.047	-0.358435
>GeneDB|Tb927.10.11250 | organism=Trypanosoma_brucei_TREU927 | product=hypothetical protein, conserved | location=Tb927_10_v5:2749376-2751994(-) | length=872	1	19	Tb927.10.11250	hypothetical protein, conserved	19	28.8	101.14	872	0.78023	38.131	-0.358029
>GeneDB|Tb927.10.10070 | organism=Trypanosoma_brucei_TREU927 | product=hypothetical protein, conserved | location=Tb927_10_v5:2482194-2483861(+) | length=555	1	2	Tb927.10.10070	hypothetical protein, conserved	2	9	61.886	555	0.78046	60.455	-0.357603
>GeneDB|Tb927.8.1990 | organism=Trypanosoma_brucei_TREU927 | product=peroxidoxin | location=Tb927_08_v4:634173-634853(+) | length=226	1	18	Tb927.8.1990	peroxidoxin	18	62.4	25.631	226	0.7806	39.961	-0.357345
>GeneDB|Tb927.4.2110 | organism=Trypanosoma_brucei_TREU927 | product=protein phosphatase 2C, putative | location=Tb927_04_v4:546879-547823(+) | length=314	1	11	Tb927.4.2110	protein phosphatase 2C, putative	11	49.7	33.456	314	0.78087	23.631	-0.356846
>GeneDB|Tb927.10.10020 | organism=Trypanosoma_brucei_TREU927 | product=hypothetical protein, conserved | location=Tb927_10_v5:2470006-2471811(+) | length=601	1	2	Tb927.10.10020	hypothetical protein, conserved	2	7	66.591	601	0.78236	17.057	-0.354095
>GeneDB|Tb927.10.12660 | organism=Trypanosoma_brucei_TREU927 | product=pumilio/PUF RNA binding protein 2 | location=Tb927_10_v5:3073130-3075673(-) | length=847	1	8	Tb927.10.12660	pumilio/PUF RNA binding protein 2	8	13.9	92.245	847	0.7825	60.016	-0.353837
>GeneDB|Tb927.6.4670 | organism=Trypanosoma_brucei_TREU927 | product=MORN repeat-containing protein,flagellar component | location=Tb927_06_v4:1303156-1304232(+) | length=358	1	25	Tb927.6.4670	MORN repeat-containing protein,flagellar component	25	74.9	40.686	358	0.78347	22.152	-0.35205
>GeneDB|Tb927.4.1740 | organism=Trypanosoma_brucei_TREU927 | product=hypothetical protein, conserved | location=Tb927_04_v4:441967-443235(-) | length=422	1	11	Tb927.4.1740	hypothetical protein, conserved	11	33.4	47.677	422	0.78422	28.787	-0.35067
>GeneDB|Tb927.10.4490 | organism=Trypanosoma_brucei_TREU927 | product=hypothetical protein, conserved | location=Tb927_10_v5:1153298-1156270(-) | length=990	1	5	Tb927.10.4490	hypothetical protein, conserved	5	6.4	115.32	990	0.78511	19.879	-0.349033
>GeneDB|Tb927.8.2560 | organism=Trypanosoma_brucei_TREU927 | product=spliceosomal U5 snRNP-specific protein, putative | location=Tb927_08_v4:755590-756057(+) | length=155	1	2	Tb927.8.2560	spliceosomal U5 snRNP-specific protein, putative	2	18.7	17.713	155	0.78514	5.5927	-0.348978
>GeneDB|Tb927.1.2100 | organism=Trypanosoma_brucei_TREU927 | product=calpain-like cysteine peptidase, putative,cysteine peptidase, Clan CA, family C2, putative | location=Tb927_01_v4:531583-535023(+) | length=1146	1	40	Tb927.1.2100	calpain-like cysteine peptidase, putative,cysteine peptidase, Clan CA, family C2, putative	40	57.8	126.15	1146	0.78717	33.749	-0.345253
>GeneDB|Tb927.10.6980 | organism=Trypanosoma_brucei_TREU927 | product=caltractin, putative | location=Tb927_10_v5:1761405-1761959(+) | length=184	1	2	Tb927.10.6980	caltractin, putative	2	13	20.68	184	0.7887	6.4749	-0.342451
>GeneDB|Tb11.02.0760 | organism=Trypanosoma_brucei_TREU927 | product=dynein heavy chain, putative | location=Tb927_11_01_v4:907008-920984(+) | length=4658;REV__>REV_GeneDB|Tb927.7.3290 Reverse sequence, was | organism=Trypanosoma_brucei_TREU927 | product=hypothetical protein, conserved | location=Tb927_07_v4:848446-849567(-) | length=373	2	206;1	Tb11.02.0760	dynein heavy chain, putative	206	53	531.18	4658	0.78941	37.898	-0.341153
>GeneDB|Tb927.8.1940 | organism=Trypanosoma_brucei_TREU927 | product=endosomal integral membrane protein, putative | location=Tb927_08_v4:622229-624115(-) | length=628	1	4	Tb927.8.1940	endosomal integral membrane protein, putative	4	10.2	70.463	628	0.78945	13.52	-0.34108
>GeneDB|Tb927.10.5260 | organism=Trypanosoma_brucei_TREU927 | product=hypothetical protein, conserved | location=Tb927_10_v5:1313983-1317390(+) | length=1135	1	6	Tb927.10.5260	hypothetical protein, conserved	6	8.3	125.06	1135	0.78966	39.002	-0.340696
>GeneDB|Tb927.3.4840 | organism=Trypanosoma_brucei_TREU927 | product=ubiquitin hydrolase, putative,cysteine peptidase, Clan CA, family C19, putative | location=Tb927_03_v4:1363025-1365220(-) | length=731	1	23	Tb927.3.4840	ubiquitin hydrolase, putative,cysteine peptidase, Clan CA, family C19, putative	23	41.7	81.752	731	0.7899	24.851	-0.340258
>GeneDB|Tb09.211.4280 | organism=Trypanosoma_brucei_TREU927 | product=hypothetical protein, conserved | location=Tb927_09_v4:2077518-2082254(-) | length=1578	1	24	Tb09.211.4280	hypothetical protein, conserved	24	21.2	177.37	1578	0.79024	36.315	-0.339637
>GeneDB|Tb927.7.4810 | organism=Trypanosoma_brucei_TREU927 | product=hypothetical protein, conserved | location=Tb927_07_v4:1268684-1270060(-) | length=458	1	4	Tb927.7.4810	hypothetical protein, conserved	4	12.9	52.176	458	0.79067	14.26	-0.338852
>GeneDB|Tb11.18.0013 | organism=Trypanosoma_brucei_TREU927 | product=proteasome regulatory non-ATP-ase subunit 3 | location=Tb927_11_01_v4:585453-586457(+) | length=334	1	18	Tb11.18.0013	proteasome regulatory non-ATP-ase subunit 3	18	59.6	38.167	334	0.79122	30.909	-0.337849
>GeneDB|Tb11.01.7325 | organism=Trypanosoma_brucei_TREU927 | product=hypothetical protein, conserved | location=Tb927_11_01_v4:4095159-4095548(-) | length=129	1	8	Tb11.01.7325	hypothetical protein, conserved	8	69.8	14.492	129	0.7914	25.375	-0.337521
>GeneDB|Tb927.10.4930 | organism=Trypanosoma_brucei_TREU927 | product=protein phosphatase 2C, putative | location=Tb927_10_v5:1227600-1228481(-) | length=293	1	2	Tb927.10.4930	protein phosphatase 2C, putative	2	7.8	32.263	293	0.79189	15.668	-0.336628
>GeneDB|Tb11.02.0990 | organism=Trypanosoma_brucei_TREU927 | product=hypothetical protein, conserved | location=Tb927_11_01_v4:1014984-1018037(+) | length=1017	1	27	Tb11.02.0990	hypothetical protein, conserved	27	42.3	115.19	1017	0.79274	29.38	-0.33508
>GeneDB|Tb11.01.8640 | organism=Trypanosoma_brucei_TREU927 | product=hypothetical protein, conserved,leucine-rich repeat protein (LRRP), putative | location=Tb927_11_01_v4:4435792-4437678(-) | length=628	1	12	Tb11.01.8640	hypothetical protein, conserved,leucine-rich repeat protein (LRRP), putative	12	23.9	70.687	628	0.79284	29.012	-0.334898
>GeneDB|Tb09.160.2350 | organism=Trypanosoma_brucei_TREU927 | product=hypothetical protein, conserved | location=Tb927_09_v4:696887-697372(+) | length=161	1	4	Tb09.160.2350	hypothetical protein, conserved	4	32.9	18.076	161	0.79286	18.049	-0.334862
>GeneDB|Tb11.47.0007 | organism=Trypanosoma_brucei_TREU927 | product=hypothetical protein, conserved | location=Tb927_11_01_v4:409596-412178(+) | length=860	1	24	Tb11.47.0007	hypothetical protein, conserved	24	35.2	94.838	860	0.7932	31.487	-0.334243
>GeneDB|Tb11.01.2310 | organism=Trypanosoma_brucei_TREU927 | product=hypothetical protein, conserved | location=Tb927_11_01_v4:2751306-2753873(+) | length=855	1	36	Tb11.01.2310	hypothetical protein, conserved	36	42.9	99.443	855	0.79357	44.913	-0.333571
>GeneDB|Tb09.211.4540 | organism=Trypanosoma_brucei_TREU927 | product=RNA-binding protein, putative | location=Tb927_09_v4:2134933-2135850(-) | length=305	1	15	Tb09.211.4540	RNA-binding protein, putative	15	47.5	34.618	305	0.79425	17.426	-0.332335
>GeneDB|Tb927.10.6960 | organism=Trypanosoma_brucei_TREU927 | product=hypothetical protein, conserved | location=Tb927_10_v5:1755170-1756132(+) | length=320;>GeneDB|Tb927.10.6920 | organism=Trypanosoma_brucei_TREU927 | product=hypothetical protein | location=Tb927_10_v5:1740960-1741922(+) | length=320;REV__>REV_GeneDB|Tb927.10.9930 Reverse sequence, was | organism=Trypanosoma_brucei_TREU927 | pro…	3	13;11;1	Tb927.10.6960	hypothetical protein, conserved	13	42.2	36.056	320	0.79513	32.803	-0.330737
>GeneDB|Tb11.50.0002 | organism=Trypanosoma_brucei_TREU927 | product=hypothetical protein, conserved | location=Tb927_11_01_v4:171156-172361(-) | length=401	1	4	Tb11.50.0002	hypothetical protein, conserved	4	14.2	44.208	401	0.7952	21.919	-0.33061
>GeneDB|Tb11.01.6030 | organism=Trypanosoma_brucei_TREU927 | product=proteasome regulatory non-ATP-ase subunit | location=Tb927_11_01_v4:3777343-3778167(+) | length=274	1	9	Tb11.01.6030	proteasome regulatory non-ATP-ase subunit	9	37.2	31.281	274	0.79535	22.586	-0.330338
>GeneDB|Tb927.4.3350 | organism=Trypanosoma_brucei_TREU927 | product=hypothetical protein, conserved | location=Tb927_04_v4:874938-876191(-) | length=417	1	8	Tb927.4.3350	hypothetical protein, conserved	8	21.3	47.244	417	0.79583	36.405	-0.329468
>GeneDB|Tb09.160.1950 | organism=Trypanosoma_brucei_TREU927 | product=acidocalcisomal exopolyphosphatase, putative | location=Tb927_09_v4:642371-643522(+) | length=383	1	12	Tb09.160.1950	acidocalcisomal exopolyphosphatase, putative	12	35.5	42.865	383	0.79602	39.9	-0.329123
>GeneDB|Tb927.10.8640 | organism=Trypanosoma_brucei_TREU927 | product=hypothetical protein, conserved | location=Tb927_10_v5:2139640-2140740(+) | length=366	1	2	Tb927.10.8640	hypothetical protein, conserved	2	8.7	39.2	366	0.79605	49.784	-0.329069
>GeneDB|Tb927.3.690 | organism=Trypanosoma_brucei_TREU927 | product=protein kinase, putative | location=Tb927_03_v4:169258-171009(-) | length=583	1	6	Tb927.3.690	protein kinase, putative	6	17.2	63.827	583	0.79619	24.319	-0.328815
>GeneDB|Tb927.10.4060 | organism=Trypanosoma_brucei_TREU927 | product=hypothetical protein, conserved | location=Tb927_10_v5:1071415-1072521(-) | length=368	1	3	Tb927.10.4060	hypothetical protein, conserved	3	13.9	39.938	368	0.79648	36.445	-0.32829
>GeneDB|Tb927.10.8780 | organism=Trypanosoma_brucei_TREU927 | product=hypothetical protein, conserved | location=Tb927_10_v5:2165297-2171806(+) | length=2169	1	20	Tb927.10.8780	hypothetical protein, conserved	20	16	244.9	2169	0.79649	29.503	-0.328272
>GeneDB|Tb927.8.3710 | organism=Trypanosoma_brucei_TREU927 | product=hypothetical protein, conserved | location=Tb927_08_v4:1112773-1115142(-) | length=789	1	5	Tb927.8.3710	hypothetical protein, conserved	5	11.8	84.503	789	0.79803	16.727	-0.325485
>GeneDB|Tb927.10.2980 | organism=Trypanosoma_brucei_TREU927 | product=proteasome regulatory non-ATPase subunit 11,19S proteasome regulatory subunit, Metallo-peptidase, Clan MP, Family M67 | location=Tb927_10_v5:778268-779185(+) | length=305;>GeneDB|Tb927.10.3030 | organism=Trypanosoma_brucei_TREU927 | product=proteasome regulatory non-ATPase subunit 11,19S proteasome regulatory subunit, Metallo-p…	2	12;12	Tb927.10.2980	proteasome regulatory non-ATPase subunit 11,19S proteasome regulatory subunit, Metallo-peptidase, Clan MP, Family M67	12	55.1	33.847	305	0.79805	25.552	-0.325449
>GeneDB|Tb11.01.3700 | organism=Trypanosoma_brucei_TREU927 | product=leucine-rich repeat protein (LRRP), putative | location=Tb927_11_01_v4:3111700-3113847(+) | length=715	1	2	Tb11.01.3700	leucine-rich repeat protein (LRRP), putative	2	2.7	79.802	715	0.7984	14.574	-0.324816
>GeneDB|Tb927.10.7420 | organism=Trypanosoma_brucei_TREU927 | product=hypothetical protein, conserved,predicted bromodomain protein | location=Tb927_10_v5:1872663-1873337(-) | length=224	1	9	Tb927.10.7420	hypothetical protein, conserved,predicted bromodomain protein	9	46	25.531	224	0.79871	21.315	-0.324256
>GeneDB|Tb927.10.14320 | organism=Trypanosoma_brucei_TREU927 | product=hypothetical protein, conserved | location=Tb927_10_v5:3479607-3483008(-) | length=1133	1	28	Tb927.10.14320	hypothetical protein, conserved	28	37.4	121.8	1133	0.80003	40.979	-0.321874
>GeneDB|Tb11.01.2885 | organism=Trypanosoma_brucei_TREU927 | product=Nucleoporin | location=Tb927_11_01_v4:2913758-2918152(+) | length=1464	1	3	Tb11.01.2885	Nucleoporin	3	4.2	140.36	1464	0.80184	60.926	-0.318614
>GeneDB|Tb11.01.5090 | organism=Trypanosoma_brucei_TREU927 | product=hypothetical protein, conserved | location=Tb927_11_01_v4:3549325-3550440(-) | length=371	1	1	Tb11.01.5090	hypothetical protein, conserved	1	4.3	41.61	371	0.80221	3.593	-0.317948
>GeneDB|Tb927.5.3260 | organism=Trypanosoma_brucei_TREU927 | product=hypothetical protein, conserved | location=Tb927_05_v4:1019002-1023201(-) | length=1399	1	17	Tb927.5.3260	hypothetical protein, conserved	17	16.9	149.17	1399	0.80237	25.021	-0.31766
>GeneDB|Tb927.10.8240 | organism=Trypanosoma_brucei_TREU927 | product=hypothetical protein, conserved | location=Tb927_10_v5:2045457-2046581(-) | length=374	1	4	Tb927.10.8240	hypothetical protein, conserved	4	16	42.845	374	0.80239	24.148	-0.317624
>GeneDB|Tb927.3.1800 | organism=Trypanosoma_brucei_TREU927 | product=hypothetical protein, conserved | location=Tb927_03_v4:465763-470148(-) | length=1461	1	10	Tb927.3.1800	hypothetical protein, conserved	10	9.5	161.94	1461	0.80281	20.84	-0.31687
>GeneDB|Tb11.02.0360 | organism=Trypanosoma_brucei_TREU927 | product=hypothetical protein, conserved | location=Tb927_11_01_v4:813370-813954(-) | length=194	1	2	Tb11.02.0360	hypothetical protein, conserved	2	11.9	22.354	194	0.80309	36.284	-0.316366
>GeneDB|Tb11.01.1870 | organism=Trypanosoma_brucei_TREU927 | product=actin-like protein, putative | location=Tb927_11_01_v4:2655026-2656210(+) | length=394	1	2	Tb11.01.1870	actin-like protein, putative	2	9.9	43.483	394	0.80435	0.36305	-0.314105
>GeneDB|Tb927.10.2860 | organism=Trypanosoma_brucei_TREU927 | product=hypothetical protein, conserved | location=Tb927_10_v5:729287-731629(+) | length=780	1	5	Tb927.10.2860	hypothetical protein, conserved	5	10	84.322	780	0.80474	43.643	-0.313405
>GeneDB|Tb11.02.3210 | organism=Trypanosoma_brucei_TREU927 | product=triosephosphate isomerase | location=Tb927_11_01_v4:1543092-1543844(+) | length=250	1	15	Tb11.02.3210	triosephosphate isomerase	15	73.6	26.819	250	0.8051	33.884	-0.31276
>GeneDB|Tb927.1.3110 | organism=Trypanosoma_brucei_TREU927 | product=soluble N-ethylmaleimide sensitive factor (NSF) attachment protein, putative | location=Tb927_01_v4:677766-678611(+) | length=281	1	12	Tb927.1.3110	soluble N-ethylmaleimide sensitive factor (NSF) attachment protein, putative	12	51.2	32.136	281	0.80555	16.807	-0.311954
>GeneDB|Tb927.5.4440 | organism=Trypanosoma_brucei_TREU927 | product=dynein light chain, putative | location=Tb927_05_v4:1314412-1314684(-) | length=90	1	1	Tb927.5.4440	dynein light chain, putative	1	13.3	10.546	90	0.80607	11.7	-0.311023
>GeneDB|Tb11.01.4400 | organism=Trypanosoma_brucei_TREU927 | product=hypothetical protein | location=Tb927_11_01_v4:3300152-3302506(+) | length=784	1	7	Tb11.01.4400	hypothetical protein	7	11.4	83.737	784	0.80645	47.253	-0.310343
>GeneDB|Tb11.02.4320 | organism=Trypanosoma_brucei_TREU927 | product=hypothetical protein, conserved | location=Tb927_11_01_v4:1801961-1804825(-) | length=954	1	42	Tb11.02.4320	hypothetical protein, conserved	42	63.2	107.35	954	0.80652	21.201	-0.310218
>GeneDB|Tb09.211.2440 | organism=Trypanosoma_brucei_TREU927 | product=hypothetical protein, conserved,unc-50 related protein homolog | location=Tb927_09_v4:1712511-1713248(-) | length=245	1	1	Tb09.211.2440	hypothetical protein, conserved,unc-50 related protein homolog	1	4.1	27.973	245	0.80674	2.7431	-0.309824
>GeneDB|Tb927.1.2430 | organism=Trypanosoma_brucei_TREU927 | product=histone H3, putative | location=Tb927_01_v4:592496-592897(+) | length=133;>GeneDB|Tb927.1.2450 | organism=Trypanosoma_brucei_TREU927 | product=histone H3, putative | location=Tb927_01_v4:594079-594480(+) | length=133;>GeneDB|Tb927.1.2470 | organism=Trypanosoma_brucei_TREU927 | product=histone H3, putative | location=Tb927_01_v4:…	7	8;8;8;8;8;8;8	Tb927.1.2430	histone H3, putative	8	56.4	14.75	133	0.80682	25.461	-0.309681
>GeneDB|Tb927.5.2290 | organism=Trypanosoma_brucei_TREU927 | product=ATP-dependent RNA helicase, putative | location=Tb927_05_v4:709355-716068(+) | length=2237	1	11	Tb927.5.2290	ATP-dependent RNA helicase, putative	11	8.3	249.28	2237	0.80699	46.121	-0.309377
>GeneDB|Tb927.10.5000 | organism=Trypanosoma_brucei_TREU927 | product=hypothetical protein, conserved | location=Tb927_10_v5:1239920-1240657(+) | length=245	1	3	Tb927.10.5000	hypothetical protein, conserved	3	11.8	28.732	245	0.80743	20.524	-0.308591
>GeneDB|Tb927.10.14360 | organism=Trypanosoma_brucei_TREU927 | product=U2 small nuclear ribonucleoprotein 40K | location=Tb927_10_v5:3492807-3493784(-) | length=325	1	3	Tb927.10.14360	U2 small nuclear ribonucleoprotein 40K	3	12.9	36.492	325	0.8075	30.014	-0.308466
>GeneDB|Tb11.01.4470 | organism=Trypanosoma_brucei_TREU927 | product=hypothetical protein, conserved | location=Tb927_11_01_v4:3317268-3318848(+) | length=526	1	3	Tb11.01.4470	hypothetical protein, conserved	3	15.6	57.121	526	0.80795	16.162	-0.307662
>GeneDB|Tb09.160.4590 | organism=Trypanosoma_brucei_TREU927 | product=arginine kinase | location=Tb927_09_v4:982261-983331(+) | length=356	1	5	Tb09.160.4590	arginine kinase	5	5.3	40.196	356	0.80811	22.632	-0.307376
>GeneDB|Tb927.10.6940 | organism=Trypanosoma_brucei_TREU927 | product=Dipeptidyl-peptidase 8-like, putative | location=Tb927_10_v5:1747152-1749704(+) | length=850;>GeneDB|Tb927.10.6970 | organism=Trypanosoma_brucei_TREU927 | product=dipeptidyl-peptidase 8-like serine peptidase,serine peptidase, Clan SC, Family S9B | location=Tb927_10_v5:1756887-1759439(+) | length=850	2	22;22	Tb927.10.6940	Dipeptidyl-peptidase 8-like, putative	22	35.5	93.683	850	0.80984	19.775	-0.304291
>GeneDB|Tb927.8.8020 | organism=Trypanosoma_brucei_TREU927 | product=monoglyceride lipase, putative | location=Tb927_08_v4:2376682-2377626(+) | length=314	1	1	Tb927.8.8020	monoglyceride lipase, putative	1	4.8	35.221	314	0.81156	0.83727	-0.30123
>GeneDB|Tb927.7.3120 | organism=Trypanosoma_brucei_TREU927 | product=small nuclear ribonucleoprotein SmD1,SmD-1 like small nuclear ribonucleoprotein | location=Tb927_07_v4:792434-792754(+) | length=106	1	3	Tb927.7.3120	small nuclear ribonucleoprotein SmD1,SmD-1 like small nuclear ribonucleoprotein	3	45.3	11.713	106	0.81219	34.693	-0.300111
>GeneDB|Tb927.10.12390 | organism=Trypanosoma_brucei_TREU927 | product=hypothetical protein, conserved | location=Tb927_10_v5:3005172-3005948(-) | length=258	1	3	Tb927.10.12390	hypothetical protein, conserved	3	17.1	29.658	258	0.81315	7.7548	-0.298407
>GeneDB|Tb11.01.5680 | organism=Trypanosoma_brucei_TREU927 | product=hypothetical protein, conserved | location=Tb927_11_01_v4:3671680-3673122(+) | length=480	1	18	Tb11.01.5680	hypothetical protein, conserved	18	45	51.674	480	0.81328	29.702	-0.298176
>GeneDB|Tb927.8.650 | organism=Trypanosoma_brucei_TREU927 | product=cation-transporting ATPase, putative | location=Tb927_08_v4:179984-183769(-) | length=1261	1	29	Tb927.8.650	cation-transporting ATPase, putative	29	30.9	140.4	1261	0.81328	30.516	-0.298176
>GeneDB|Tb927.7.450 | organism=Trypanosoma_brucei_TREU927 | product=hypothetical protein, conserved | location=Tb927_07_v4:79940-82252(-) | length=770;>GeneDB|Tb927.7.390 | organism=Trypanosoma_brucei_TREU927 | product=hypothetical protein, conserved | location=Tb927_07_v4:70817-72082(-) | length=421	2	3;2	Tb927.7.450	hypothetical protein, conserved	3	4.9	85.921	770	0.81343	8.1036	-0.29791
>GeneDB|Tb927.10.8420 | organism=Trypanosoma_brucei_TREU927 | product=target of rapamycin (TOR) kinase 1 | location=Tb927_10_v5:2083912-2091210(+) | length=2432	1	4	Tb927.10.8420	target of rapamycin (TOR) kinase 1	4	2.4	271.39	2432	0.81355	22.407	-0.297697
>GeneDB|Tb927.3.1240 | organism=Trypanosoma_brucei_TREU927 | product=protein phosphatase 2A, putative | location=Tb927_03_v4:309482-310453(+) | length=323	1	4	Tb927.3.1240	protein phosphatase 2A, putative	4	22.9	36.243	323	0.81375	22.381	-0.297342
>GeneDB|Tb927.7.5090 | organism=Trypanosoma_brucei_TREU927 | product=hypothetical protein, conserved | location=Tb927_07_v4:1343808-1346672(+) | length=954	1	8	Tb927.7.5090	hypothetical protein, conserved	8	13.4	102.36	954	0.81403	23.875	-0.296846
>GeneDB|Tb927.5.2820 | organism=Trypanosoma_brucei_TREU927 | product=protein kinase, putative | location=Tb927_05_v4:891502-894594(-) | length=1030	1	8	Tb927.5.2820	protein kinase, putative	8	13.1	111.62	1030	0.81428	38.05	-0.296403
>GeneDB|Tb11.03.0030 | organism=Trypanosoma_brucei_TREU927 | product=ABC transporter, putative | location=Tb927_11_01_v4:273680-275734(+) | length=684;REV__>REV_GeneDB|Tb927.7.7330 Reverse sequence, was | organism=Trypanosoma_brucei_TREU927 | product=hypothetical protein, conserved | location=Tb927_07_v4:2115709-2116947(-) | length=412	2	13;1	Tb11.03.0030	ABC transporter, putative	13	25.1	75.51	684	0.81569	22.16	-0.293907
>GeneDB|Tb927.10.4460 | organism=Trypanosoma_brucei_TREU927 | product=leucine carboxyl methyltransferase, putative | location=Tb927_10_v5:1146401-1147303(-) | length=300	1	6	Tb927.10.4460	leucine carboxyl methyltransferase, putative	6	23.3	34.221	300	0.81579	21.02	-0.29373
>GeneDB|Tb927.8.4500 | organism=Trypanosoma_brucei_TREU927 | product=eukaryotic translation initation factor 4 gamma, putative | location=Tb927_08_v4:1332286-1334535(-) | length=749	1	30	Tb927.8.4500	eukaryotic translation initation factor 4 gamma, putative	30	53.1	84.574	749	0.81589	25.554	-0.293553
>GeneDB|Tb11.01.8190 | organism=Trypanosoma_brucei_TREU927 | product=hypothetical protein, conserved | location=Tb927_11_01_v4:4307342-4309693(-) | length=783	1	3	Tb11.01.8190	hypothetical protein, conserved	3	5.4	85.058	783	0.81611	15.546	-0.293164
>GeneDB|Tb927.10.3810 | organism=Trypanosoma_brucei_TREU927 | product=hypothetical protein, conserved | location=Tb927_10_v5:1001904-1003691(-) | length=595	1	4	Tb927.10.3810	hypothetical protein, conserved	4	6.2	64.888	595	0.81649	67.349	-0.292493
>GeneDB|Tb927.8.2640 | organism=Trypanosoma_brucei_TREU927 | product=ubiquitin-activating enzyme e1, putative | location=Tb927_08_v4:779218-782385(+) | length=1055	1	47	Tb927.8.2640	ubiquitin-activating enzyme e1, putative	47	64.9	116.41	1055	0.81679	23.065	-0.291963
>GeneDB|Tb927.1.2120 | organism=Trypanosoma_brucei_TREU927 | product=calpain, putative,cysteine peptidase, Clan CA, family C2, putative | location=Tb927_01_v4:540718-542916(+) | length=732	1	14	Tb927.1.2120	calpain, putative,cysteine peptidase, Clan CA, family C2, putative	14	29.6	82.62	732	0.81755	16.133	-0.290621
>GeneDB|Tb927.8.6760 | organism=Trypanosoma_brucei_TREU927 | product=IgE-dependent histamine-releasing factor, putative | location=Tb927_08_v4:1955207-1955719(-) | length=170	1	5	Tb927.8.6760	IgE-dependent histamine-releasing factor, putative	5	45.9	19.35	170	0.81791	100.61	-0.289986
>GeneDB|Tb09.160.4910 | organism=Trypanosoma_brucei_TREU927 | product=flavoprotein monooxygenase, putative | location=Tb927_09_v4:1052255-1054042(+) | length=595	1	2	Tb09.160.4910	flavoprotein monooxygenase, putative	2	4	66.234	595	0.81797	106.18	-0.28988
>GeneDB|Tb09.211.4610 | organism=Trypanosoma_brucei_TREU927 | product=vesicle-associated membrane protein, putative | location=Tb927_09_v4:2146872-2147489(-) | length=205	1	5	Tb09.211.4610	vesicle-associated membrane protein, putative	5	39	23.167	205	0.819	20.769	-0.288065
>GeneDB|Tb927.7.3290 | organism=Trypanosoma_brucei_TREU927 | product=hypothetical protein, conserved | location=Tb927_07_v4:848446-849567(-) | length=373	1	6	Tb927.7.3290	hypothetical protein, conserved	6	25.2	40.159	373	0.8192	29.764	-0.287712
>GeneDB|Tb927.7.5450 | organism=Trypanosoma_brucei_TREU927 | product=lipin, putative | location=Tb927_07_v4:1470188-1472608(+) | length=806	1	2	Tb927.7.5450	lipin, putative	2	4.2	86.742	806	0.81928	25.479	-0.287571
>GeneDB|Tb927.10.13880 | organism=Trypanosoma_brucei_TREU927 | product=hypothetical protein, conserved | location=Tb927_10_v5:3386114-3389374(-) | length=1086	1	2	Tb927.10.13880	hypothetical protein, conserved	2	3.4	120.87	1086	0.81931	35.043	-0.287519
>GeneDB|Tb927.10.15660 | organism=Trypanosoma_brucei_TREU927 | product=hypothetical protein, conserved | location=Tb927_10_v5:3839256-3841595(+) | length=779	1	7	Tb927.10.15660	hypothetical protein, conserved	7	12.1	85.608	779	0.8194	127.78	-0.28736
>GeneDB|Tb11.01.1570 | organism=Trypanosoma_brucei_TREU927 | product=NUDIX hydrolase, conserved | location=Tb927_11_01_v4:2595801-2596541(-) | length=246	1	4	Tb11.01.1570	NUDIX hydrolase, conserved	4	20.3	27.514	246	0.81945	33.058	-0.287272
>GeneDB|Tb09.160.3760 | organism=Trypanosoma_brucei_TREU927 | product=mismatch repair protein MSH3, putative,mismatch repair protein | location=Tb927_09_v4:871371-874178(+) | length=935	1	2	Tb09.160.3760	mismatch repair protein MSH3, putative,mismatch repair protein	2	3.5	102.22	935	0.82057	8.6904	-0.285302
>GeneDB|Tb09.160.2400 | organism=Trypanosoma_brucei_TREU927 | product=hypothetical protein, conserved | location=Tb927_09_v4:701838-703634(+) | length=598	1	2	Tb09.160.2400	hypothetical protein, conserved	2	6.7	66.967	598	0.82161	30.328	-0.283474
>GeneDB|Tb927.4.2920 | organism=Trypanosoma_brucei_TREU927 | product=hypothetical protein, conserved | location=Tb927_04_v4:774789-777689(+) | length=966	1	12	Tb927.4.2920	hypothetical protein, conserved	12	15	107.59	966	0.8221	39.638	-0.282614
>GeneDB|Tb09.160.1250 | organism=Trypanosoma_brucei_TREU927 | product=hypothetical protein, conserved | location=Tb927_09_v4:563003-566269(-) | length=1088	1	18	Tb09.160.1250	hypothetical protein, conserved	18	24	121.33	1088	0.82291	27.747	-0.281193
>GeneDB|Tb09.211.0690 | organism=Trypanosoma_brucei_TREU927 | product=hypothetical protein, conserved | location=Tb927_09_v4:1389513-1390550(-) | length=345	1	12	Tb09.211.0690	hypothetical protein, conserved	12	49.3	38.856	345	0.82326	36.432	-0.28058
>GeneDB|Tb927.10.13320 | organism=Trypanosoma_brucei_TREU927 | product=DNA-directed RNA polymerases II subunit, putative | location=Tb927_10_v5:3250999-3251658(-) | length=219	1	5	Tb927.10.13320	DNA-directed RNA polymerases II subunit, putative	5	45.2	25.21	219	0.8243	52.299	-0.278759
>GeneDB|Tb927.8.1510 | organism=Trypanosoma_brucei_TREU927 | product=ATP-dependent DEAD/H RNA helicase, putative | location=Tb927_08_v4:490829-493862(+) | length=569	1	24	Tb927.8.1510	ATP-dependent DEAD/H RNA helicase, putative	24	60.1	62.439	569	0.82472	21.489	-0.278024
>GeneDB|Tb927.6.2550 | organism=Trypanosoma_brucei_TREU927 | product=RNA-binding protein, putative | location=Tb927_06_v4:771666-773933(+) | length=724	1	28	Tb927.6.2550	RNA-binding protein, putative	28	48.3	79.849	724	0.82621	46.297	-0.27542
>GeneDB|Tb11.01.1650 | organism=Trypanosoma_brucei_TREU927 | product=signal recognition particle receptor alpha subunit, putative | location=Tb927_11_01_v4:2614941-2616689(+) | length=582	1	14	Tb11.01.1650	signal recognition particle receptor alpha subunit, putative	14	36.1	63.526	582	0.82649	54.192	-0.274931
>GeneDB|Tb927.3.5570 | organism=Trypanosoma_brucei_TREU927 | product=syntaxin, putative | location=Tb927_03_v4:1560401-1561183(+) | length=260	1	3	Tb927.3.5570	syntaxin, putative	3	14.6	29.242	260	0.8265	133.97	-0.274913
>GeneDB|Tb927.10.8690 | organism=Trypanosoma_brucei_TREU927 | product=hypothetical protein, conserved | location=Tb927_10_v5:2148363-2149373(+) | length=336	1	2	Tb927.10.8690	hypothetical protein, conserved	2	11.6	37.923	336	0.82699	0.68785	-0.274058
>GeneDB|Tb927.3.1560 | organism=Trypanosoma_brucei_TREU927 | product=hypothetical protein, conserved | location=Tb927_03_v4:408298-409440(-) | length=380	1	3	Tb927.3.1560	hypothetical protein, conserved	3	19.5	42.111	380	0.82757	30.11	-0.273047
>GeneDB|Tb927.3.2340 | organism=Trypanosoma_brucei_TREU927 | product=peroxin-2,glycosome import protein (gim1) | location=Tb927_03_v4:599846-600844(+) | length=332	1	3	Tb927.3.2340	peroxin-2,glycosome import protein (gim1)	3	16.9	37.747	332	0.82769	37.272	-0.272838
>GeneDB|Tb09.160.5070 | organism=Trypanosoma_brucei_TREU927 | product=DNA topoisomerase type IB small subunit | location=Tb927_09_v4:1081758-1082579(+) | length=273	1	5	Tb09.160.5070	DNA topoisomerase type IB small subunit	5	23.4	29.968	273	0.82769	29.79	-0.272838
>GeneDB|Tb09.160.5030 | organism=Trypanosoma_brucei_TREU927 | product=cAMP-specific phosphodiesterase, putative | location=Tb927_09_v4:1075759-1077714(+) | length=651	1	3	Tb09.160.5030	cAMP-specific phosphodiesterase, putative	3	5.2	72.857	651	0.82807	31.067	-0.272175
>GeneDB|Tb927.10.4890 | organism=Trypanosoma_brucei_TREU927 | product=hypothetical protein, conserved | location=Tb927_10_v5:1219534-1220439(-) | length=301	1	1	Tb927.10.4890	hypothetical protein, conserved	1	4.7	32.142	301	0.82827	41.573	-0.271827
>GeneDB|Tb927.6.620 | organism=Trypanosoma_brucei_TREU927 | product=hypothetical protein, conserved | location=Tb927_06_v4:251004-259190(-) | length=2728	1	16	Tb927.6.620	hypothetical protein, conserved	16	8.7	301.88	2728	0.82907	34.578	-0.270434
>GeneDB|Tb927.10.10330 | organism=Trypanosoma_brucei_TREU927 | product=hypothetical protein, conserved | location=Tb927_10_v5:2538105-2539778(-) | length=557	1	2	Tb927.10.10330	hypothetical protein, conserved	2	5.7	62.877	557	0.82943	13.165	-0.269808
>GeneDB|Tb927.8.640 | organism=Trypanosoma_brucei_TREU927 | product=hypothetical protein, conserved | location=Tb927_08_v4:178808-179149(-) | length=113	1	2	Tb927.8.640	hypothetical protein, conserved	2	29.2	12.203	113	0.83032	26.687	-0.268261
>GeneDB|Tb11.01.8480 | organism=Trypanosoma_brucei_TREU927 | product=chaperone protein DNAj, putative | location=Tb927_11_01_v4:4395791-4396945(-) | length=384	1	2	Tb11.01.8480	chaperone protein DNAj, putative	2	6.2	42.846	384	0.83059	27.06	-0.267792
>GeneDB|Tb09.211.0740 | organism=Trypanosoma_brucei_TREU927 | product=p21 antigen protein, putative | location=Tb927_09_v4:1397811-1398383(-) | length=190	1	12	Tb09.211.0740	p21 antigen protein, putative	12	53.2	21.06	190	0.83082	22.342	-0.267392
>GeneDB|Tb927.10.12720 | organism=Trypanosoma_brucei_TREU927 | product=hypothetical protein, conserved | location=Tb927_10_v5:3088703-3091411(-) | length=902	1	7	Tb927.10.12720	hypothetical protein, conserved	7	9.2	104.64	902	0.83085	46.806	-0.26734
>GeneDB|Tb927.10.750 | organism=Trypanosoma_brucei_TREU927 | product=hypothetical protein, conserved | location=Tb927_10_v5:195904-196284(+) | length=126	1	4	Tb927.10.750	hypothetical protein, conserved	4	42.1	14.182	126	0.83115	7.4535	-0.266819
>GeneDB|Tb927.3.5370 | organism=Trypanosoma_brucei_TREU927 | product=hypothetical protein, conserved | location=Tb927_03_v4:1504126-1505067(+) | length=313	1	13	Tb927.3.5370	hypothetical protein, conserved	13	43.5	34.254	313	0.83288	42.878	-0.263819
>GeneDB|Tb11.02.5790 | organism=Trypanosoma_brucei_TREU927 | product=RNA polymerase B subunit RPB8, putative | location=Tb927_11_01_v4:2180158-2180607(-) | length=149	1	1	Tb11.02.5790	RNA polymerase B subunit RPB8, putative	1	6	16.33	149	0.83325	10.129	-0.263179
>GeneDB|Tb11.46.0011 | organism=Trypanosoma_brucei_TREU927 | product=hypothetical protein, conserved,leucine-rich repeat protein (LRRP), putative | location=Tb927_11_01_v4:551359-552606(+) | length=415	1	6	Tb11.46.0011	hypothetical protein, conserved,leucine-rich repeat protein (LRRP), putative	6	26.3	45.499	415	0.83372	38.093	-0.262365
>GeneDB|Tb927.4.1330 | organism=Trypanosoma_brucei_TREU927 | product=DNA topoisomerase IB, large subunit | location=Tb927_04_v4:349385-351475(-) | length=696;>GeneDB|Tb927.10.10440 | organism=Trypanosoma_brucei_TREU927 | product=mitochondrial carrier protein, putative | location=Tb927_10_v5:2570065-2571207(-) | length=380	2	20;1	Tb927.4.1330	DNA topoisomerase IB, large subunit	20	35.5	79.257	696	0.83508	44.753	-0.260014
>GeneDB|Tb927.5.1000 | organism=Trypanosoma_brucei_TREU927 | product=ubiquitin-conjugating enzyme e2, putative,ubiquitin carrier protein, putative,ubiquitin-protein ligase, putative | location=Tb927_05_v4:328251-328697(+) | length=148	1	8	Tb927.5.1000	ubiquitin-conjugating enzyme e2, putative,ubiquitin carrier protein, putative,ubiquitin-protein ligase, putative	8	80.4	16.766	148	0.83552	24.395	-0.259254
>GeneDB|Tb927.10.11400 | organism=Trypanosoma_brucei_TREU927 | product=hypothetical protein, conserved | location=Tb927_10_v5:2778619-2779857(+) | length=412	1	2	Tb927.10.11400	hypothetical protein, conserved	2	14.1	43.304	412	0.83629	8.1612	-0.257925
>GeneDB|Tb927.10.3330 | organism=Trypanosoma_brucei_TREU927 | product=hypothetical protein, conserved | location=Tb927_10_v5:857768-858817(+) | length=349	1	3	Tb927.10.3330	hypothetical protein, conserved	3	10	40.092	349	0.83684	21.781	-0.256976
>GeneDB|Tb927.4.1680 | organism=Trypanosoma_brucei_TREU927 | product=hypothetical protein, conserved,ZFP family member, putative | location=Tb927_04_v4:429665-431074(-) | length=469	1	11	Tb927.4.1680	hypothetical protein, conserved,ZFP family member, putative	11	39.2	51.675	469	0.83692	17.43	-0.256838
>GeneDB|Tb11.01.1390 | organism=Trypanosoma_brucei_TREU927 | product=hypothetical protein, conserved | location=Tb927_11_01_v4:2565544-2566230(-) | length=228;REV__>REV_GeneDB|Tb11.01.6050 Reverse sequence, was | organism=Trypanosoma_brucei_TREU927 | product=hypothetical protein, conserved | location=Tb927_11_01_v4:3781512-3783785(+) | length=757;>REV_CON_Q6IFU6 Reverse sequence, was Type I hair …	3	3;0;0	Tb11.01.1390	hypothetical protein, conserved	3	27.6	25.504	228	0.83694	26.345	-0.256804
>GeneDB|Tb927.4.2850 | organism=Trypanosoma_brucei_TREU927 | product=hypothetical protein, conserved | location=Tb927_04_v4:752534-754579(+) | length=681	1	3	Tb927.4.2850	hypothetical protein, conserved	3	7.3	72.637	681	0.83725	32.923	-0.25627
>GeneDB|Tb09.211.2205 | organism=Trypanosoma_brucei_TREU927 | product=hypothetical protein, conserved | location=Tb927_09_v4:1660646-1660915(-) | length=89	1	3	Tb09.211.2205	hypothetical protein, conserved	3	32.6	10.42	89	0.8388	20.75	-0.253601
>GeneDB|Tb927.2.4230 | organism=Trypanosoma_brucei_TREU927 | product=NUP-1 protein, putative | location=Tb927_02_v4:743882-754825(-) | length=3647	1	26	Tb927.2.4230	NUP-1 protein, putative	26	49.1	406.9	3647	0.83897	33.694	-0.253309
>GeneDB|Tb927.10.3010 | organism=Trypanosoma_brucei_TREU927 | product=hypothetical protein, conserved | location=Tb927_10_v5:786335-790006(+) | length=1223	1	10	Tb927.10.3010	hypothetical protein, conserved	10	11.2	133.39	1223	0.83913	37.429	-0.253034
>GeneDB|Tb927.6.3030 | organism=Trypanosoma_brucei_TREU927 | product=hypothetical protein, conserved | location=Tb927_06_v4:900273-902759(+) | length=828	1	2	Tb927.6.3030	hypothetical protein, conserved	2	5.3	92.526	828	0.83954	12.586	-0.252329
>GeneDB|Tb09.160.0520 | organism=Trypanosoma_brucei_TREU927 | product=hypothetical protein, conserved | location=Tb927_09_v4:364404-369221(-) | length=1605	1	10	Tb09.160.0520	hypothetical protein, conserved	10	14	182.2	1605	0.83993	36.691	-0.251659
>GeneDB|Tb927.10.8110 | organism=Trypanosoma_brucei_TREU927 | product=hypothetical protein, conserved | location=Tb927_10_v5:2018724-2019548(-) | length=274	1	3	Tb927.10.8110	hypothetical protein, conserved	3	11.3	30.41	274	0.84168	29.757	-0.248656
>GeneDB|Tb09.211.2360 | organism=Trypanosoma_brucei_TREU927 | product=protein kinase A catalytic subunit isoform 2,protein kinase A catalytic subunit | location=Tb927_09_v4:1685952-1686962(-) | length=336	1	3	Tb09.211.2360	protein kinase A catalytic subunit isoform 2,protein kinase A catalytic subunit	3	13.1	38.569	336	0.84212	19.334	-0.247902
>GeneDB|Tb927.7.2440 | organism=Trypanosoma_brucei_TREU927 | product=pyrroline-5-carboxylate reductase, putative | location=Tb927_07_v4:628844-629656(-) | length=270	1	4	Tb927.7.2440	pyrroline-5-carboxylate reductase, putative	4	15.9	28.271	270	0.84254	16.393	-0.247183
>GeneDB|Tb927.2.1890 | organism=Trypanosoma_brucei_TREU927 | product=E2-like ubiquitin-conjugation enzyme | location=Tb927_02_v4:350887-351765(+) | length=292	1	5	Tb927.2.1890	E2-like ubiquitin-conjugation enzyme	5	38	33.628	292	0.84338	55.236	-0.245745
>GeneDB|Tb11.02.3130 | organism=Trypanosoma_brucei_TREU927 | product=malic enzyme, putative | location=Tb927_11_01_v4:1526132-1527847(+) | length=571	1	27	Tb11.02.3130	malic enzyme, putative	27	66.5	63.119	571	0.84386	17.181	-0.244924
>GeneDB|Tb927.7.4290 | organism=Trypanosoma_brucei_TREU927 | product=hypothetical protein, conserved | location=Tb927_07_v4:1139932-1140825(-) | length=297	1	18	Tb927.7.4290	hypothetical protein, conserved	18	55.9	33.703	297	0.84404	25.923	-0.244617
>GeneDB|Tb927.7.2820 | organism=Trypanosoma_brucei_TREU927 | product=histone H2A, putative | location=Tb927_07_v4:728982-729386(+) | length=134;>GeneDB|Tb927.7.2830 | organism=Trypanosoma_brucei_TREU927 | product=histone H2A, putative | location=Tb927_07_v4:729892-730296(+) | length=134;>GeneDB|Tb927.7.2840 | organism=Trypanosoma_brucei_TREU927 | product=histone H2A, putative | location=Tb927_07_…	13	10;10;10;10;10;10;10;10;10;10;10;10;10	Tb927.7.2820	histone H2A, putative	10	64.9	14.212	134	0.84418	27.212	-0.244377
>GeneDB|Tb927.10.8000 | organism=Trypanosoma_brucei_TREU927 | product=hypothetical protein, conserved | location=Tb927_10_v5:1991925-1995914(-) | length=1329	1	11	Tb927.10.8000	hypothetical protein, conserved	11	12.5	151.01	1329	0.84493	41.708	-0.243096
>GeneDB|Tb11.01.7690 | organism=Trypanosoma_brucei_TREU927 | product=proteasome regulatory non-ATP-ase subunit 7 | location=Tb927_11_01_v4:4186456-4187655(-) | length=399;REV__>REV_GeneDB|Tb11.02.5040 Reverse sequence, was | organism=Trypanosoma_brucei_TREU927 | product=hypothetical protein, conserved | location=Tb927_11_01_v4:1986993-1988834(-) | length=613	2	13;1	Tb11.01.7690	proteasome regulatory non-ATP-ase subunit 7	13	42.4	45.549	399	0.84599	27.314	-0.241287
>GeneDB|Tb927.10.6230 | organism=Trypanosoma_brucei_TREU927 | product=hypothetical protein, conserved,MORN repeat containing protein | location=Tb927_10_v5:1579930-1582002(-) | length=690	1	3	Tb927.10.6230	hypothetical protein, conserved,MORN repeat containing protein	3	5.7	77.026	690	0.84654	194.22	-0.24035
>GeneDB|Tb927.10.4520 | organism=Trypanosoma_brucei_TREU927 | product=fructose- 2,6- bisphosphatase-like protein | location=Tb927_10_v5:1159602-1161038(-) | length=478	1	3	Tb927.10.4520	fructose- 2,6- bisphosphatase-like protein	3	9.8	53.911	478	0.84797	49.822	-0.237915
>GeneDB|Tb11.01.7200 | organism=Trypanosoma_brucei_TREU927 | product=Nucleoporin | location=Tb927_11_01_v4:4071315-4072934(-) | length=539	1	2	Tb11.01.7200	Nucleoporin	2	7.4	52.786	539	0.84842	27.534	-0.237149
>GeneDB|Tb927.6.4120 | organism=Trypanosoma_brucei_TREU927 | product=GTPase activating protein, putative | location=Tb927_06_v4:1190435-1191850(-) | length=471	1	2	Tb927.6.4120	GTPase activating protein, putative	2	8.1	54.112	471	0.84854	15.887	-0.236945
>GeneDB|Tb927.7.5840 | organism=Trypanosoma_brucei_TREU927 | product=hypothetical protein, conserved | location=Tb927_07_v4:1574648-1575337(+) | length=229	1	5	Tb927.7.5840	hypothetical protein, conserved	5	17.9	26.164	229	0.84869	17.85	-0.23669
>GeneDB|Tb11.01.1170 | organism=Trypanosoma_brucei_TREU927 | product=hypothetical protein, conserved | location=Tb927_11_01_v4:2524173-2526836(-) | length=887	1	33	Tb11.01.1170	hypothetical protein, conserved	33	53.1	95.905	887	0.84994	80.466	-0.234567
>GeneDB|Tb927.2.5850 | organism=Trypanosoma_brucei_TREU927 | product=small nuclear ribonucleoprotein SmD2 | location=Tb927_02_v4:1058748-1059083(+) | length=111	1	4	Tb927.2.5850	small nuclear ribonucleoprotein SmD2	4	37.8	12.518	111	0.8501	24.888	-0.234296
>GeneDB|Tb927.10.10340 | organism=Trypanosoma_brucei_TREU927 | product=structural maintenance of chromosome 2, putative | location=Tb927_10_v5:2540513-2544040(-) | length=1175	1	16	Tb927.10.10340	structural maintenance of chromosome 2, putative	16	15.2	134	1175	0.85029	29.374	-0.233973
>GeneDB|Tb11.02.1160 | organism=Trypanosoma_brucei_TREU927 | product=calmodulin, putative | location=Tb927_11_01_v4:1063852-1064322(+) | length=156	1	1	Tb11.02.1160	calmodulin, putative	1	8.3	17.675	156	0.8506	11.655	-0.233447
>GeneDB|Tb927.10.3540 | organism=Trypanosoma_brucei_TREU927 | product=hypothetical protein, conserved | location=Tb927_10_v5:915333-916013(+) | length=226	1	3	Tb927.10.3540	hypothetical protein, conserved	3	30.1	24.291	226	0.85087	59.245	-0.232989
>GeneDB|Tb927.10.2940 | organism=Trypanosoma_brucei_TREU927 | product=hypothetical protein, conserved | location=Tb927_10_v5:765576-766640(+) | length=354	1	7	Tb927.10.2940	hypothetical protein, conserved	7	26.8	38.468	354	0.85152	24.651	-0.231888
>GeneDB|Tb927.10.12850 | organism=Trypanosoma_brucei_TREU927 | product=hypothetical protein, conserved | location=Tb927_10_v5:3121782-3122930(-) | length=382	1	4	Tb927.10.12850	hypothetical protein, conserved	4	14.1	41.512	382	0.85169	27.287	-0.2316
>GeneDB|Tb927.5.2570 | organism=Trypanosoma_brucei_TREU927 | product=translation initiation factor, putative | location=Tb927_05_v4:825553-827643(+) | length=696	1	36	Tb927.5.2570	translation initiation factor, putative	36	63.9	79.81	696	0.85207	37.416	-0.230956
>GeneDB|Tb11.01.1400 | organism=Trypanosoma_brucei_TREU927 | product=glycyl-tRNA synthetase, putative | location=Tb927_11_01_v4:2566767-2568641(-) | length=624	1	33	Tb11.01.1400	glycyl-tRNA synthetase, putative	33	54.6	70.175	624	0.85213	44.217	-0.230855
>GeneDB|Tb927.7.3880 | organism=Trypanosoma_brucei_TREU927 | product=protein kinase, putative | location=Tb927_07_v4:1011421-1013751(-) | length=776	1	14	Tb927.7.3880	protein kinase, putative	14	26	87.072	776	0.85283	32.274	-0.22967
>GeneDB|Tb11.01.3370 | organism=Trypanosoma_brucei_TREU927 | product=glycosomal membrane protein, putative | location=Tb927_11_01_v4:3029096-3029752(+) | length=218	1	13	Tb11.01.3370	glycosomal membrane protein, putative	13	59.6	24.027	218	0.8531	14.564	-0.229213
>GeneDB|Tb927.8.6440 | organism=Trypanosoma_brucei_TREU927 | product=RNA-binding protein, putative | location=Tb927_08_v4:1863511-1864065(+) | length=184	1	6	Tb927.8.6440	RNA-binding protein, putative	6	43.5	20.37	184	0.85395	22.16	-0.227776
>GeneDB|Tb927.10.2810 | organism=Trypanosoma_brucei_TREU927 | product=hypothetical protein, conserved | location=Tb927_10_v5:721079-722095(+) | length=338	1	16	Tb927.10.2810	hypothetical protein, conserved	16	53.6	38.589	338	0.85415	26.405	-0.227439
>GeneDB|Tb11.01.1310 | organism=Trypanosoma_brucei_TREU927 | product=replication factor C, subunit 4, putative | location=Tb927_11_01_v4:2551449-2552474(-) | length=341	1	6	Tb11.01.1310	replication factor C, subunit 4, putative	6	27.3	37.586	341	0.8545	23.13	-0.226848
>GeneDB|Tb927.5.3510 | organism=Trypanosoma_brucei_TREU927 | product=structural maintenance of chromosome 3 , putative | location=Tb927_05_v4:1102436-1106035(+) | length=1199	1	27	Tb927.5.3510	structural maintenance of chromosome 3 , putative	27	26.1	136.37	1199	0.85461	63.124	-0.226662
>GeneDB|Tb11.01.5100 | organism=Trypanosoma_brucei_TREU927 | product=par1 | location=Tb927_11_01_v4:3551486-3553264(-) | length=592;>REV_GeneDB|Tb927.6.1290 Reverse sequence, was | organism=Trypanosoma_brucei_TREU927 | product=hypothetical protein, conserved | location=Tb927_06_v4:472974-475673(-) | length=899	2	47;1	Tb11.01.5100	par1	47	78.9	68.349	592	0.85496	91.277	-0.226071
>GeneDB|Tb927.3.5280 | organism=Trypanosoma_brucei_TREU927 | product=spliceosome-associated protein 49, putative | location=Tb927_03_v4:1482820-1483596(+) | length=258	1	2	Tb927.3.5280	spliceosome-associated protein 49, putative	2	7.4	29.823	258	0.8552	11.071	-0.225666
>GeneDB|Tb927.4.210 | organism=Trypanosoma_brucei_TREU927 | product=retrotransposon hot spot protein (RHS, pseudogene), putative,retrotransposon hot spot protein 2 (RHS2), interrupted, degenerate | location=Tb927_04_v4:39136-40569(-) | length=477	1	2	Tb927.4.210	retrotransposon hot spot protein (RHS, pseudogene), putative,retrotransposon hot spot protein 2 (RHS2), interrupted, degenerate	2	8	52.568	477	0.85561	22.355	-0.224975
>GeneDB|Tb927.8.5380 | organism=Trypanosoma_brucei_TREU927 | product=hypothetical protein, conserved | location=Tb927_08_v4:1595502-1595795(-) | length=97	1	4	Tb927.8.5380	hypothetical protein, conserved	4	61.9	10.47	97	0.85595	26.371	-0.224402
>GeneDB|Tb927.7.4990 | organism=Trypanosoma_brucei_TREU927 | product=hypothetical protein, conserved | location=Tb927_07_v4:1321294-1323534(+) | length=746	1	9	Tb927.7.4990	hypothetical protein, conserved	9	16.2	82.659	746	0.85638	30.437	-0.223677
>GeneDB|Tb927.3.3540 | organism=Trypanosoma_brucei_TREU927 | product=Nucleoporin | location=Tb927_03_v4:994998-996533(+) | length=511	1	8	Tb927.3.3540	Nucleoporin	8	31.9	52.878	511	0.8581	28.278	-0.220782
>GeneDB|Tb927.10.15360 | organism=Trypanosoma_brucei_TREU927 | product=hypothetical protein, conserved | location=Tb927_10_v5:3763602-3768911(+) | length=1769	1	13	Tb927.10.15360	hypothetical protein, conserved	13	11.4	191.99	1769	0.86016	28.804	-0.217323
>GeneDB|Tb927.7.6420 | organism=Trypanosoma_brucei_TREU927 | product=hypothetical protein, conserved | location=Tb927_07_v4:1743388-1743780(-) | length=130	1	1	Tb927.7.6420	hypothetical protein, conserved	1	13.8	14.427	130	0.86035	17.702	-0.217004
>GeneDB|Tb11.01.1830 | organism=Trypanosoma_brucei_TREU927 | product=hypothetical protein, conserved | location=Tb927_11_01_v4:2648579-2649244(+) | length=221	1	8	Tb11.01.1830	hypothetical protein, conserved	8	51.1	25.415	221	0.8605	25.206	-0.216753
>GeneDB|Tb927.3.2200 | organism=Trypanosoma_brucei_TREU927 | product=hypothetical protein, conserved | location=Tb927_03_v4:575548-576594(-) | length=348	1	3	Tb927.3.2200	hypothetical protein, conserved	3	8.3	38.83	348	0.86077	169.7	-0.2163
>GeneDB|Tb927.10.6840 | organism=Trypanosoma_brucei_TREU927 | product=hypothetical protein, conserved | location=Tb927_10_v5:1722287-1723174(+) | length=295	1	5	Tb927.10.6840	hypothetical protein, conserved	5	21	34.255	295	0.86093	90.651	-0.216032
>GeneDB|Tb927.10.3710 | organism=Trypanosoma_brucei_TREU927 | product=proteasome activator protein PA26 | location=Tb927_10_v5:966089-966784(-) | length=231	1	13	Tb927.10.3710	proteasome activator protein PA26	13	62.3	25.258	231	0.86099	71.229	-0.215932
>GeneDB|Tb11.02.0810 | organism=Trypanosoma_brucei_TREU927 | product=hypothetical protein, conserved | location=Tb927_11_01_v4:941887-944685(+) | length=932	1	20	Tb11.02.0810	hypothetical protein, conserved	20	23.5	107.86	932	0.8611	58.286	-0.215747
>GeneDB|Tb927.8.3690 | organism=Trypanosoma_brucei_TREU927 | product=isocitrate dehydrogenase [NADP], mitochondrial precursor, putative | location=Tb927_08_v4:1105208-1106521(-) | length=437	1	13	Tb927.8.3690	isocitrate dehydrogenase [NADP], mitochondrial precursor, putative	13	42.1	48.565	437	0.86125	18.994	-0.215496
>GeneDB|Tb09.211.1370 | organism=Trypanosoma_brucei_TREU927 | product=glyceraldehyde-3-phosphate dehydrogenase, putative | location=Tb927_09_v4:1508427-1509494(-) | length=355	1	21	Tb09.211.1370	glyceraldehyde-3-phosphate dehydrogenase, putative	21	68.5	38.802	355	0.86129	22.063	-0.215429
>GeneDB|Tb927.8.4320 | organism=Trypanosoma_brucei_TREU927 | product=hypothetical protein, conserved | location=Tb927_08_v4:1281416-1285816(-) | length=1466	1	3	Tb927.8.4320	hypothetical protein, conserved	3	3.9	167.7	1466	0.86185	57.171	-0.214491
>GeneDB|Tb927.3.1740 | organism=Trypanosoma_brucei_TREU927 | product=hypothetical protein, conserved | location=Tb927_03_v4:453963-456014(-) | length=683	1	9	Tb927.3.1740	hypothetical protein, conserved	9	20.1	76.97	683	0.86214	33.946	-0.214006
>GeneDB|Tb927.8.1790 | organism=Trypanosoma_brucei_TREU927 | product=hypothetical protein, conserved | location=Tb927_08_v4:589174-589644(-) | length=156	1	3	Tb927.8.1790	hypothetical protein, conserved	3	16	17.441	156	0.86225	15.353	-0.213822
>GeneDB|Tb927.6.570 | organism=Trypanosoma_brucei_TREU927 | product=hypothetical protein, conserved | location=Tb927_06_v4:239485-239850(-) | length=104	1	1	Tb927.6.570	hypothetical protein, conserved	1	15.4	11.847	104	0.86247	21.486	-0.213454
>GeneDB|Tb11.18.0004 | organism=Trypanosoma_brucei_TREU927 | product=eukaryotic translation initiation factor 4e, putative | location=Tb927_11_01_v4:620193-620894(+) | length=233	1	7	Tb11.18.0004	eukaryotic translation initiation factor 4e, putative	7	30	26.024	233	0.86259	23.342	-0.213253
>GeneDB|Tb927.7.3160 | organism=Trypanosoma_brucei_TREU927 | product=dynein heavy chain, cytosolic, putative | location=Tb927_07_v4:801917-817789(+) | length=5290	1	4	Tb927.7.3160	dynein heavy chain, cytosolic, putative	4	1.3	596.65	5290	0.86336	25.107	-0.211966
>GeneDB|Tb11.01.3960 | organism=Trypanosoma_brucei_TREU927 | product=flagellar protein essential for flagellar pocket biogenesis | location=Tb927_11_01_v4:3182045-3183808(+) | length=587;REV__>REV_GeneDB|Tb927.10.10120 Reverse sequence, was | organism=Trypanosoma_brucei_TREU927 | product=hypothetical protein, conserved | location=Tb927_10_v5:2493006-2494730(+) | length=574;>REV_GeneDB|Tb927.10.74…	4	32;1;1;1	Tb11.01.3960	flagellar protein essential for flagellar pocket biogenesis	32	56.9	67.325	587	0.86494	34.989	-0.209328
>GeneDB|Tb927.10.3160 | organism=Trypanosoma_brucei_TREU927 | product=hypothetical protein, conserved | location=Tb927_10_v5:823231-823623(+) | length=130	1	5	Tb927.10.3160	hypothetical protein, conserved	5	56.9	14.605	130	0.86561	29.214	-0.208211
>GeneDB|Tb927.7.1320 | organism=Trypanosoma_brucei_TREU927 | product=10 kDa heat shock protein, putative | location=Tb927_07_v4:341451-341753(+) | length=100;>GeneDB|Tb927.7.1340 | organism=Trypanosoma_brucei_TREU927 | product=10 kDa heat shock protein, putative | location=Tb927_07_v4:343648-343950(+) | length=100	2	6;6	Tb927.7.1320	10 kDa heat shock protein, putative	6	77	10.67	100	0.86747	31.003	-0.205114
>GeneDB|Tb927.6.3220 | organism=Trypanosoma_brucei_TREU927 | product=hypothetical protein, conserved | location=Tb927_06_v4:953077-956316(+) | length=1079	1	4	Tb927.6.3220	hypothetical protein, conserved	4	5.5	115.74	1079	0.86762	32.297	-0.204865
>GeneDB|Tb927.7.6640 | organism=Trypanosoma_brucei_TREU927 | product=hypothetical protein, conserved | location=Tb927_07_v4:1817494-1822347(-) | length=1617	1	7	Tb927.7.6640	hypothetical protein, conserved	7	6.1	172.49	1617	0.8688	57.776	-0.202904
>GeneDB|Tb927.8.7460 | organism=Trypanosoma_brucei_TREU927 | product=metal-ion transporter, putative | location=Tb927_08_v4:2147994-2149409(+) | length=471	1	1	Tb927.8.7460	metal-ion transporter, putative	1	2.1	50.823	471	0.86891	13.338	-0.202721
>GeneDB|Tb927.7.3550 | organism=Trypanosoma_brucei_TREU927 | product=hypothetical protein, conserved | location=Tb927_07_v4:917218-920943(-) | length=1241	1	65	Tb927.7.3550	hypothetical protein, conserved	65	53.1	138.16	1241	0.87025	81.81	-0.200498
>GeneDB|Tb927.10.2540 | organism=Trypanosoma_brucei_TREU927 | product=adenylate kinase, putative | location=Tb927_10_v5:660803-661492(+) | length=229	1	2	Tb927.10.2540	adenylate kinase, putative	2	21.4	25.656	229	0.87164	15.574	-0.198196
>GeneDB|Tb927.7.6210 | organism=Trypanosoma_brucei_TREU927 | product=hypothetical protein, conserved | location=Tb927_07_v4:1680405-1681190(-) | length=261	1	1	Tb927.7.6210	hypothetical protein, conserved	1	5.4	29.217	261	0.87347	18.874	-0.19517
>GeneDB|Tb11.01.5070 | organism=Trypanosoma_brucei_TREU927 | product=hypothetical protein, conserved | location=Tb927_11_01_v4:3545869-3546579(-) | length=236	1	5	Tb11.01.5070	hypothetical protein, conserved	5	24.6	26.244	236	0.87363	30.152	-0.194906
>GeneDB|Tb927.8.2730 | organism=Trypanosoma_brucei_TREU927 | product=hypothetical protein, conserved | location=Tb927_08_v4:808373-809521(+) | length=382	1	1	Tb927.8.2730	hypothetical protein, conserved	1	4.2	42.775	382	0.87378	42.132	-0.194658
>GeneDB|Tb927.10.9400 | organism=Trypanosoma_brucei_TREU927 | product=branch point binding protein, putative | location=Tb927_10_v5:2324478-2325293(+) | length=271	1	8	Tb927.10.9400	branch point binding protein, putative	8	34.3	31.63	271	0.87534	53.743	-0.192085
>GeneDB|Tb927.7.4760 | organism=Trypanosoma_brucei_TREU927 | product=hypothetical protein, conserved | location=Tb927_07_v4:1262653-1264272(-) | length=539	1	4	Tb927.7.4760	hypothetical protein, conserved	4	11.3	58.815	539	0.87543	26.109	-0.191936
>GeneDB|Tb927.6.1080 | organism=Trypanosoma_brucei_TREU927 | product=glyoxalase II | location=Tb927_06_v4:428456-429346(-) | length=296	1	11	Tb927.6.1080	glyoxalase II	11	48	32.508	296	0.87631	43.618	-0.190487
>GeneDB|Tb927.10.6810 | organism=Trypanosoma_brucei_TREU927 | product=guanylate kinase, putative | location=Tb927_10_v5:1717161-1717955(+) | length=264	1	6	Tb927.10.6810	guanylate kinase, putative	6	31.8	29.956	264	0.87682	48.842	-0.189647
>GeneDB|Tb927.7.7280 | organism=Trypanosoma_brucei_TREU927 | product=RNA-binding protein, putative | location=Tb927_07_v4:2101047-2102888(-) | length=613	1	2	Tb927.7.7280	RNA-binding protein, putative	2	4.9	65.487	613	0.87696	8.6566	-0.189417
>GeneDB|Tb927.3.3650 | organism=Trypanosoma_brucei_TREU927 | product=hypothetical protein, conserved | location=Tb927_03_v4:1022896-1024569(+) | length=557	1	2	Tb927.3.3650	hypothetical protein, conserved	2	5.6	63.158	557	0.87846	1.1325	-0.186951
>GeneDB|Tb927.8.6900 | organism=Trypanosoma_brucei_TREU927 | product=hypothetical protein, conserved | location=Tb927_08_v4:1992276-1992911(-) | length=211	1	4	Tb927.8.6900	hypothetical protein, conserved	4	32.2	23.536	211	0.88034	25.539	-0.183867
>GeneDB|Tb927.6.1290 | organism=Trypanosoma_brucei_TREU927 | product=hypothetical protein, conserved | location=Tb927_06_v4:472974-475673(-) | length=899	1	16	Tb927.6.1290	hypothetical protein, conserved	16	22	100.58	899	0.88062	23.97	-0.183408
>GeneDB|Tb927.10.7060 | organism=Trypanosoma_brucei_TREU927 | product=nucleoporin interacting component (NUP93), putative | location=Tb927_10_v5:1776795-1779446(+) | length=883	1	24	Tb927.10.7060	nucleoporin interacting component (NUP93), putative	24	34.1	96.511	883	0.88076	25.685	-0.183179
>GeneDB|Tb927.1.1670 | organism=Trypanosoma_brucei_TREU927 | product=hypothetical protein, conserved | location=Tb927_01_v4:420035-423280(+) | length=1081;REV__>GeneDB|Tb06.3A7.960 | organism=Trypanosoma_brucei_TREU927 | product=hypothetical protein | location=Tb927_06_v4:484320-485252(+) | length=310	2	38;1	Tb927.1.1670	hypothetical protein, conserved	38	44.1	120.87	1081	0.88079	24.517	-0.18313
>GeneDB|Tb927.8.6250 | organism=Trypanosoma_brucei_TREU927 | product=hypothetical protein, conserved | location=Tb927_08_v4:1816925-1819000(+) | length=691	1	2	Tb927.8.6250	hypothetical protein, conserved	2	4.6	75.474	691	0.88098	34.482	-0.182819
>GeneDB|Tb11.01.6200 | organism=Trypanosoma_brucei_TREU927 | product=hypothetical protein, conserved | location=Tb927_11_01_v4:3813071-3814960(+) | length=629	1	13	Tb11.01.6200	hypothetical protein, conserved	13	28.3	70.339	629	0.88132	15.465	-0.182262
>GeneDB|Tb09.211.2970 | organism=Trypanosoma_brucei_TREU927 | product=structural maintenance of chromosome 1, putative | location=Tb927_09_v4:1796997-1800824(+) | length=1275	1	26	Tb09.211.2970	structural maintenance of chromosome 1, putative	26	22.3	144.54	1275	0.88248	37.922	-0.180365
>GeneDB|Tb11.02.4280 | organism=Trypanosoma_brucei_TREU927 | product=hypothetical protein, conserved | location=Tb927_11_01_v4:1783809-1787768(-) | length=1319	1	25	Tb11.02.4280	hypothetical protein, conserved	25	28.5	144.87	1319	0.88391	38.326	-0.178029
>GeneDB|Tb11.01.1510 | organism=Trypanosoma_brucei_TREU927 | product=hypothetical protein, conserved | location=Tb927_11_01_v4:2585328-2586620(-) | length=430	1	2	Tb11.01.1510	hypothetical protein, conserved	2	5.8	45.743	430	0.88395	20.558	-0.177963
>GeneDB|Tb927.3.4980 | organism=Trypanosoma_brucei_TREU927 | product=hypothetical protein, conserved (pseudogene),hypothetical protein, conserved, frameshift | location=Tb927_03_v4:1399310-1400962(+) | length=551	1	10	Tb927.3.4980	hypothetical protein, conserved (pseudogene),hypothetical protein, conserved, frameshift	10	20.7	61.742	551	0.88434	15.862	-0.177327
>GeneDB|Tb927.4.730 | organism=Trypanosoma_brucei_TREU927 | product=hypothetical protein, conserved | location=Tb927_04_v4:203680-205158(-) | length=492	1	5	Tb927.4.730	hypothetical protein, conserved	5	15.4	55.016	492	0.88555	27.526	-0.175354
>GeneDB|Tb927.6.2120 | organism=Trypanosoma_brucei_TREU927 | product=hypothetical protein, conserved | location=Tb927_06_v4:679965-680717(-) | length=250	1	2	Tb927.6.2120	hypothetical protein, conserved	2	14.8	27.385	250	0.88685	26.627	-0.173238
>GeneDB|Tb927.3.3170 | organism=Trypanosoma_brucei_TREU927 | product=hypothetical protein, conserved | location=Tb927_03_v4:816030-817994(-) | length=654	1	8	Tb927.3.3170	hypothetical protein, conserved	8	21.4	70.454	654	0.88714	66.309	-0.172766
>GeneDB|Tb927.5.1910 | organism=Trypanosoma_brucei_TREU927 | product=hypothetical protein, conserved | location=Tb927_05_v4:591955-595458(+) | length=1167	1	3	Tb927.5.1910	hypothetical protein, conserved	3	4.5	126.97	1167	0.88724	9.6581	-0.172604
>GeneDB|Tb11.01.4920 | organism=Trypanosoma_brucei_TREU927 | product=hypothetical protein, conserved | location=Tb927_11_01_v4:3513978-3516437(-) | length=819	1	3	Tb11.01.4920	hypothetical protein, conserved	3	5.6	88.553	819	0.88897	30.142	-0.169793
>GeneDB|Tb927.5.3970 | organism=Trypanosoma_brucei_TREU927 | product=adenylate kinase, putative | location=Tb927_05_v4:1227539-1228321(+) | length=260	1	7	Tb927.5.3970	adenylate kinase, putative	7	38.5	29.872	260	0.889	19.498	-0.169745
>GeneDB|Tb927.6.2460 | organism=Trypanosoma_brucei_TREU927 | product=ubiquitin fusion degradation protein 2, putative,ubiquitin conjugation factor E4 B, putative | location=Tb927_06_v4:751703-754702(+) | length=999	1	18	Tb927.6.2460	ubiquitin fusion degradation protein 2, putative,ubiquitin conjugation factor E4 B, putative	18	21.7	112.63	999	0.89006	29.263	-0.168026
>GeneDB|Tb927.3.4680 | organism=Trypanosoma_brucei_TREU927 | product=RAB GDP dissociation inhibitor alpha, putative | location=Tb927_03_v4:1324134-1325471(-) | length=445	1	21	Tb927.3.4680	RAB GDP dissociation inhibitor alpha, putative	21	75.5	49.396	445	0.89017	22.584	-0.167847
>GeneDB|Tb11.01.6170 | organism=Trypanosoma_brucei_TREU927 | product=cleavage and polyadenylation specificity factor-like protein, putative | location=Tb927_11_01_v4:3803922-3808280(+) | length=1452	1	15	Tb11.01.6170	cleavage and polyadenylation specificity factor-like protein, putative	15	14.1	159.06	1452	0.89057	26.361	-0.167199
>GeneDB|Tb11.01.8100 | organism=Trypanosoma_brucei_TREU927 | product=enolase, putative | location=Tb927_11_01_v4:4294074-4295597(-) | length=507	1	5	Tb11.01.8100	enolase, putative	5	18.9	55.68	507	0.89076	24.339	-0.166891
>GeneDB|Tb11.01.4850 | organism=Trypanosoma_brucei_TREU927 | product=hypothetical protein, conserved | location=Tb927_11_01_v4:3501002-3501814(-) | length=270	1	8	Tb11.01.4850	hypothetical protein, conserved	8	47.4	30.104	270	0.89108	27.112	-0.166373
>GeneDB|Tb927.10.9150 | organism=Trypanosoma_brucei_TREU927 | product=hypothetical protein, conserved | location=Tb927_10_v5:2266922-2267824(+) | length=300	1	6	Tb927.10.9150	hypothetical protein, conserved	6	30	33.243	300	0.89133	26.616	-0.165968
>GeneDB|Tb927.7.4030 | organism=Trypanosoma_brucei_TREU927 | product=hypothetical protein, conserved | location=Tb927_07_v4:1067412-1069028(+) | length=538	1	6	Tb927.7.4030	hypothetical protein, conserved	6	15.8	59.792	538	0.89135	32.424	-0.165936
>GeneDB|Tb927.8.820 | organism=Trypanosoma_brucei_TREU927 | product=hypothetical protein, conserved | location=Tb927_08_v4:235164-236825(-) | length=553	1	13	Tb927.8.820	hypothetical protein, conserved	13	28.8	61.686	553	0.89192	23.045	-0.165014
>GeneDB|Tb927.7.2140 | organism=Trypanosoma_brucei_TREU927 | product=hypothetical protein,zinc finger protein family member, putative | location=Tb927_07_v4:549560-550690(-) | length=376	1	8	Tb927.7.2140	hypothetical protein,zinc finger protein family member, putative	8	35.1	40.864	376	0.89223	42.746	-0.164512
>GeneDB|Tb11.01.3110 | organism=Trypanosoma_brucei_TREU927 | product=heat shock protein 70 | location=Tb927_11_01_v4:2971037-2973109(+) | length=690	1	41	Tb11.01.3110	heat shock protein 70	41	49.1	75.366	690	0.89229	25.026	-0.164415
>GeneDB|Tb927.5.4470 | organism=Trypanosoma_brucei_TREU927 | product=hypothetical protein, conserved | location=Tb927_05_v4:1320606-1323143(-) | length=845	1	7	Tb927.5.4470	hypothetical protein, conserved	7	11.1	95.764	845	0.89296	20.637	-0.163333
>GeneDB|Tb11.01.4600 | organism=Trypanosoma_brucei_TREU927 | product=cleavage and polyadenylation specificity factor 30 kDa subunit,CPSF 30 kDa subunit,NS1 effector domain- binding protein 1 | location=Tb927_11_01_v4:3345426-3346259(-) | length=277	1	2	Tb11.01.4600	cleavage and polyadenylation specificity factor 30 kDa subunit,CPSF 30 kDa subunit,NS1 effector domain- binding protein 1	2	16.2	31.603	277	0.89445	8.1183	-0.160927
>GeneDB|Tb927.8.1360 | organism=Trypanosoma_brucei_TREU927 | product=hypothetical protein, conserved | location=Tb927_08_v4:432175-444849(-) | length=4224	1	3	Tb927.8.1360	hypothetical protein, conserved	3	1.3	473.17	4224	0.89484	9.1441	-0.160298
>GeneDB|Tb09.211.4155 | organism=Trypanosoma_brucei_TREU927 | product=hypothetical protein, conserved | location=Tb927_09_v4:2047885-2048184(-) | length=99	1	1	Tb09.211.4155	hypothetical protein, conserved	1	31.3	10.694	99	0.89496	8.022	-0.160105
>GeneDB|Tb927.6.3890 | organism=Trypanosoma_brucei_TREU927 | product=replication factor C, subunit 2, putative | location=Tb927_06_v4:1150779-1151822(-) | length=347	1	5	Tb927.6.3890	replication factor C, subunit 2, putative	5	18.2	38.809	347	0.89514	16.894	-0.159815
>GeneDB|Tb11.02.2890 | organism=Trypanosoma_brucei_TREU927 | product=hypothetical protein, conserved | location=Tb927_11_01_v4:1467059-1467766(+) | length=235	1	9	Tb11.02.2890	hypothetical protein, conserved	9	49.4	25.968	235	0.89606	71.869	-0.158333
>GeneDB|Tb11.03.0140 | organism=Trypanosoma_brucei_TREU927 | product=Nucleoporin | location=Tb927_11_01_v4:249751-254412(+) | length=1553	1	27	Tb11.03.0140	Nucleoporin	27	23.9	158.38	1553	0.89643	30.926	-0.157737
>GeneDB|Tb11.02.0210 | organism=Trypanosoma_brucei_TREU927 | product=hypothetical protein, conserved | location=Tb927_11_01_v4:746584-747969(-) | length=461	1	41	Tb11.02.0210	hypothetical protein, conserved	41	73.5	50.887	461	0.89681	26.311	-0.157126
>GeneDB|Tb927.10.1550 | organism=Trypanosoma_brucei_TREU927 | product=proteasome regulatory non-ATP-ase subunit 5,19S proteasome regulatory subunit | location=Tb927_10_v5:426281-427729(-) | length=482;>REV_GeneDB|Tb927.8.4370 Reverse sequence, was | organism=Trypanosoma_brucei_TREU927 | product=hypothetical protein, conserved | location=Tb927_08_v4:1303070-1305802(-) | length=910;REV__>REV_GeneDB…	3	23;0;0	Tb927.10.1550	proteasome regulatory non-ATP-ase subunit 5,19S proteasome regulatory subunit	23	63.1	54.896	482	0.89777	28.851	-0.155582
>GeneDB|Tb927.2.5150 | organism=Trypanosoma_brucei_TREU927 | product=TPR-repeat protein, putative | location=Tb927_02_v4:909185-910654(+) | length=489	1	13	Tb927.2.5150	TPR-repeat protein, putative	13	41.3	54.016	489	0.89829	19.341	-0.154747
>GeneDB|Tb11.02.2850 | organism=Trypanosoma_brucei_TREU927 | product=hypothetical protein, conserved,leucine-rich repeat protein (LRRP), putative | location=Tb927_11_01_v4:1454559-1459055(+) | length=1498	1	2	Tb11.02.2850	hypothetical protein, conserved,leucine-rich repeat protein (LRRP), putative	2	3.1	168.29	1498	0.89915	28.49	-0.153366
>GeneDB|Tb927.10.1200 | organism=Trypanosoma_brucei_TREU927 | product=hypothetical protein, conserved | location=Tb927_10_v5:322922-323959(-) | length=345	1	2	Tb927.10.1200	hypothetical protein, conserved	2	11.9	38.925	345	0.89969	149.71	-0.1525
>GeneDB|Tb09.160.1160 | organism=Trypanosoma_brucei_TREU927 | product=nucleolar protein | location=Tb927_09_v4:519123-521405(-) | length=757;>GeneDB|Tb09.160.1180 | organism=Trypanosoma_brucei_TREU927 | product=nucleolar protein | location=Tb927_09_v4:522399-524138(-) | length=576;REV__>GeneDB|Tb11.01.0960 | organism=Trypanosoma_brucei_TREU927 | product=proteasome regulatory non-ATP-ase subunit 2…	3	60;39;0	Tb09.160.1160	nucleolar protein	60	72.4	85.913	757	0.90211	35.755	-0.148625
>GeneDB|Tb11.02.0460 | organism=Trypanosoma_brucei_TREU927 | product=Nucleoporin | location=Tb927_11_01_v4:838577-840967(-) | length=796	1	18	Tb11.02.0460	Nucleoporin	18	32.8	89.154	796	0.90221	22.446	-0.148465
>GeneDB|Tb927.2.1330 | organism=Trypanosoma_brucei_TREU927 | product=retrotransposon hot spot protein (RHS, pseudogene), putative,retrotransposon hot spot protein 6 (RHS6), degenerate | location=Tb927_02_v4:245650-247458(+) | length=602	1	11	Tb927.2.1330	retrotransposon hot spot protein (RHS, pseudogene), putative,retrotransposon hot spot protein 6 (RHS6), degenerate	11	22.4	65.638	602	0.90251	20.969	-0.147985
>GeneDB|Tb927.3.3220 | organism=Trypanosoma_brucei_TREU927 | product=hypothetical protein, conserved | location=Tb927_03_v4:830201-832906(-) | length=901	1	16	Tb927.3.3220	hypothetical protein, conserved	16	21.4	101.23	901	0.9028	24.028	-0.147522
>GeneDB|Tb09.160.5660 | organism=Trypanosoma_brucei_TREU927 | product=hypothetical protein, conserved | location=Tb927_09_v4:1212762-1213337(-) | length=191	1	1	Tb09.160.5660	hypothetical protein, conserved	1	6.3	20.39	191	0.90389	3.5617	-0.145781
>GeneDB|Tb11.55.0012 | organism=Trypanosoma_brucei_TREU927 | product=vesicular-fusion protein SEC18, putative | location=Tb927_11_01_v4:494019-496685(-) | length=888	1	6	Tb11.55.0012	vesicular-fusion protein SEC18, putative	6	9.7	97.907	888	0.90418	125.69	-0.145318
>GeneDB|Tb927.4.2340 | organism=Trypanosoma_brucei_TREU927 | product=hypothetical protein, conserved | location=Tb927_04_v4:606820-608397(+) | length=525	1	5	Tb927.4.2340	hypothetical protein, conserved	5	13.1	58.866	525	0.90448	15.464	-0.144839
>GeneDB|Tb11.01.6640 | organism=Trypanosoma_brucei_TREU927 | product=survival of motor neuron (SMN)-like protein | location=Tb927_11_01_v4:3932698-3933171(-) | length=157	1	1	Tb11.01.6640	survival of motor neuron (SMN)-like protein	1	9.6	17.026	157	0.90487	6.1659	-0.144218
>GeneDB|Tb09.160.0490 | organism=Trypanosoma_brucei_TREU927 | product=hypothetical protein, conserved | location=Tb927_09_v4:357352-358746(-) | length=464	1	4	Tb09.160.0490	hypothetical protein, conserved	4	13.4	51.489	464	0.90527	33.478	-0.14358
>GeneDB|Tb11.02.1660 | organism=Trypanosoma_brucei_TREU927 | product=hypothetical protein, conserved | location=Tb927_11_01_v4:1198672-1200195(-) | length=477	1	2	Tb11.02.1660	hypothetical protein, conserved	2	9	52.535	477	0.9056	100.09	-0.143054
>GeneDB|Tb927.10.14610 | organism=Trypanosoma_brucei_TREU927 | product=hypothetical protein, conserved,leucine-rich repeat protein (LRRP), putative | location=Tb927_10_v5:3576468-3579779(-) | length=1103	1	18	Tb927.10.14610	hypothetical protein, conserved,leucine-rich repeat protein (LRRP), putative	18	20.3	121.48	1103	0.90637	40.181	-0.141828
>GeneDB|Tb11.02.4040 | organism=Trypanosoma_brucei_TREU927 | product=protein transport protein Sec31, putative,cytosolic coat protein, putative | location=Tb927_11_01_v4:1714316-1718011(-) | length=1231	1	25	Tb11.02.4040	protein transport protein Sec31, putative,cytosolic coat protein, putative	25	35.5	131.1	1231	0.90639	49.74	-0.141796
>GeneDB|Tb927.3.4810 | organism=Trypanosoma_brucei_TREU927 | product=hypothetical protein, conserved | location=Tb927_03_v4:1355664-1356515(-) | length=283	1	2	Tb927.3.4810	hypothetical protein, conserved	2	6.7	31.194	283	0.90651	48.983	-0.141605
>GeneDB|Tb927.7.1400 | organism=Trypanosoma_brucei_TREU927 | product=hypothetical protein, conserved | location=Tb927_07_v4:354449-356110(+) | length=553	1	2	Tb927.7.1400	hypothetical protein, conserved	2	8.7	60.696	553	0.90659	24.714	-0.141478
>GeneDB|Tb927.6.890 | organism=Trypanosoma_brucei_TREU927 | product=hypothetical protein, conserved | location=Tb927_06_v4:379887-384581(-) | length=1564	1	2	Tb927.6.890	hypothetical protein, conserved	2	1.9	173.05	1564	0.90668	1.2661	-0.141335
>GeneDB|Tb927.6.3080 | organism=Trypanosoma_brucei_TREU927 | product=hypothetical protein | location=Tb927_06_v4:910535-911086(+) | length=183	1	3	Tb927.6.3080	hypothetical protein	3	25.7	20.674	183	0.9073	81.264	-0.140348
>GeneDB|Tb927.8.3970 | organism=Trypanosoma_brucei_TREU927 | product=oxidoreductase, putative | location=Tb927_08_v4:1185927-1187228(-) | length=433	1	6	Tb927.8.3970	oxidoreductase, putative	6	26.1	45.637	433	0.90758	28.719	-0.139903
>GeneDB|Tb927.10.7790 | organism=Trypanosoma_brucei_TREU927 | product=ubiquitin fusion degradation protein, putative | location=Tb927_10_v5:1953583-1954503(-) | length=306	1	3	Tb927.10.7790	ubiquitin fusion degradation protein, putative	3	11.4	33.574	306	0.90773	26.598	-0.139665
>GeneDB|Tb11.01.1920 | organism=Trypanosoma_brucei_TREU927 | product=60S ribosomal protein L22, putative | location=Tb927_11_01_v4:2666819-2667211(+) | length=130	1	1	Tb11.01.1920	60S ribosomal protein L22, putative	1	10	15.259	130	0.90785	10.562	-0.139474
>GeneDB|Tb11.18.0017 | organism=Trypanosoma_brucei_TREU927 | product=choline kinase | location=Tb927_11_01_v4:576027-577322(+) | length=431	1	5	Tb11.18.0017	choline kinase	5	19.5	49.158	431	0.90802	19.536	-0.139204
>GeneDB|Tb09.211.0090 | organism=Trypanosoma_brucei_TREU927 | product=hypothetical protein, conserved | location=Tb927_09_v4:1280736-1282361(-) | length=541	1	2	Tb09.211.0090	hypothetical protein, conserved	2	7.2	58.484	541	0.9095	16.042	-0.136854
>GeneDB|Tb11.01.3080 | organism=Trypanosoma_brucei_TREU927 | product=heat shock protein 70, putative | location=Tb927_11_01_v4:2963244-2965274(+) | length=676	1	12	Tb11.01.3080	heat shock protein 70, putative	12	22.9	73.63	676	0.91016	68.294	-0.135808
>GeneDB|Tb11.03.0930 | organism=Trypanosoma_brucei_TREU927 | product=hypothetical protein, conserved | location=Tb927_11_01_v4:46065-48263(-) | length=732	1	1	Tb11.03.0930	hypothetical protein, conserved	1	2.9	81.336	732	0.91037	15.615	-0.135475
>GeneDB|Tb927.10.3170 | organism=Trypanosoma_brucei_TREU927 | product=ABC transporter, putative | location=Tb927_10_v5:824089-826260(+) | length=723	1	19	Tb927.10.3170	ABC transporter, putative	19	37.3	82.425	723	0.91139	23.63	-0.13386
>GeneDB|Tb927.10.8540 | organism=Trypanosoma_brucei_TREU927 | product=chaperone protein DNAj, putative | location=Tb927_10_v5:2118253-2119263(+) | length=336	1	13	Tb927.10.8540	chaperone protein DNAj, putative	13	56.8	36.435	336	0.91171	68.29	-0.133353
>GeneDB|Tb927.10.14180 | organism=Trypanosoma_brucei_TREU927 | product=protein transport protein Sec13, putative,cytosolic coat protein, putative | location=Tb927_10_v5:3444294-3445418(-) | length=374	1	16	Tb927.10.14180	protein transport protein Sec13, putative,cytosolic coat protein, putative	16	62.8	41.675	374	0.91207	77.73	-0.132784
>GeneDB|Tb09.160.3710 | organism=Trypanosoma_brucei_TREU927 | product=proliferative cell nuclear antigen (PCNA), putative | location=Tb927_09_v4:865854-866732(+) | length=292	1	18	Tb09.160.3710	proliferative cell nuclear antigen (PCNA), putative	18	72.3	32.314	292	0.91239	20.161	-0.132277
>GeneDB|Tb927.1.190 | organism=Trypanosoma_brucei_TREU927 | product=retrotransposon hot spot protein (RHS, pseudogene), putative | location=Tb927_01_v4:75424-77913(-) | length=830;>GeneDB|Tb927.2.1160 | organism=Trypanosoma_brucei_TREU927 | product=retrotransposon hot spot protein (RHS, pseudogene), putative,retrotransposon hot spot protein 2 (RHS2), interrupted, degenerate | location=Tb927_02_v4…	4	10;0;1;0	Tb927.1.190	retrotransposon hot spot protein (RHS, pseudogene), putative	10	25.2	94.659	830	0.91241	51.631	-0.132246
>GeneDB|Tb927.2.220 | organism=Trypanosoma_brucei_TREU927 | product=retrotransposon hot spot protein (RHS, pseudogene), putative,retrotransposon hot spot protein 2 (RHS2), interrupted, degenerate | location=Tb927_02_v4:23835-24614(-) | length=260	1	1	Tb927.2.220	retrotransposon hot spot protein (RHS, pseudogene), putative,retrotransposon hot spot protein 2 (RHS2), interrupted, degenerate	1	3.5	29.081	260	0.91277	33.208	-0.131677
>GeneDB|Tb11.02.3390 | organism=Trypanosoma_brucei_TREU927 | product=dynein light chain, putative | location=Tb927_11_01_v4:1579138-1579770(+) | length=210	1	9	Tb11.02.3390	dynein light chain, putative	9	55.2	23.96	210	0.91453	23.344	-0.128898
>GeneDB|Tb09.211.1360 | organism=Trypanosoma_brucei_TREU927 | product=hypothetical protein, conserved | location=Tb927_09_v4:1506367-1506825(-) | length=152	1	3	Tb09.211.1360	hypothetical protein, conserved	3	19.7	16.882	152	0.91505	31.829	-0.128078
>GeneDB|Tb927.4.3130 | organism=Trypanosoma_brucei_TREU927 | product=Spef1,flagellar component | location=Tb927_04_v4:824258-825085(+) | length=275	1	3	Tb927.4.3130	Spef1,flagellar component	3	13.8	30.637	275	0.91514	32.63	-0.127936
>GeneDB|Tb09.211.1290 | organism=Trypanosoma_brucei_TREU927 | product=hypothetical protein, conserved | location=Tb927_09_v4:1493542-1494549(-) | length=335	1	6	Tb09.211.1290	hypothetical protein, conserved	6	25.7	36.786	335	0.9156	28.764	-0.127211
>GeneDB|Tb927.10.15430 | organism=Trypanosoma_brucei_TREU927 | product=hypothetical protein, conserved | location=Tb927_10_v5:3790337-3792001(+) | length=554	1	4	Tb927.10.15430	hypothetical protein, conserved	4	7	59.61	554	0.916	24.271	-0.12658
>GeneDB|Tb927.10.6020 | organism=Trypanosoma_brucei_TREU927 | product=hypothetical protein, conserved | location=Tb927_10_v5:1516680-1517216(-) | length=178	1	7	Tb927.10.6020	hypothetical protein, conserved	7	54.5	18.564	178	0.91605	19.405	-0.126502
>GeneDB|Tb927.10.14010 | organism=Trypanosoma_brucei_TREU927 | product=hypothetical protein, conserved | location=Tb927_10_v5:3414309-3415700(-) | length=463	1	14	Tb927.10.14010	hypothetical protein, conserved	14	34.8	50.631	463	0.91611	35.838	-0.126407
>GeneDB|Tb09.211.3470 | organism=Trypanosoma_brucei_TREU927 | product=hypothetical protein, conserved | location=Tb927_09_v4:1899139-1899606(+) | length=155	1	3	Tb09.211.3470	hypothetical protein, conserved	3	25.8	17.452	155	0.91646	100.41	-0.125856
>GeneDB|Tb927.5.4320 | organism=Trypanosoma_brucei_TREU927 | product=zinc finger protein family member, putative | location=Tb927_05_v4:1290895-1291737(-) | length=280	1	2	Tb927.5.4320	zinc finger protein family member, putative	2	15.7	31.036	280	0.91689	16.785	-0.125179
>GeneDB|Tb09.211.3350 | organism=Trypanosoma_brucei_TREU927 | product=hypothetical protein, conserved | location=Tb927_09_v4:1872213-1874258(+) | length=681	1	3	Tb09.211.3350	hypothetical protein, conserved	3	3.8	76.666	681	0.91727	25.62	-0.124582
>GeneDB|Tb11.01.1370 | organism=Trypanosoma_brucei_TREU927 | product=eukaryotic translation initiation factor 3 subunit, putative,TGF-beta receptor interacting protein 1 | location=Tb927_11_01_v4:2560450-2561478(-) | length=342	1	11	Tb11.01.1370	eukaryotic translation initiation factor 3 subunit, putative,TGF-beta receptor interacting protein 1	11	59.6	37.736	342	0.91762	29.403	-0.124031
>GeneDB|Tb11.02.2260 | organism=Trypanosoma_brucei_TREU927 | product=kinesin, putative,MCAK-like kinesin, putative,kinesin family member 6, putative | location=Tb927_11_01_v4:1320399-1322471(+) | length=690	1	2	Tb11.02.2260	kinesin, putative,MCAK-like kinesin, putative,kinesin family member 6, putative	2	2.8	76.989	690	0.91783	236.65	-0.123701
>GeneDB|Tb927.2.2860 | organism=Trypanosoma_brucei_TREU927 | product=hypothetical protein, conserved | location=Tb927_02_v4:548825-549931(+) | length=368	1	2	Tb927.2.2860	hypothetical protein, conserved	2	5.7	39.186	368	0.9182	45.969	-0.12312
>GeneDB|Tb927.1.180 | organism=Trypanosoma_brucei_TREU927 | product=retrotransposon hot spot protein 1 (RHS1), putative | location=Tb927_01_v4:69904-72405(-) | length=833	1	2	Tb927.1.180	retrotransposon hot spot protein 1 (RHS1), putative	2	1.6	94.488	833	0.91888	18.152	-0.122052
>GeneDB|Tb927.5.1140 | organism=Trypanosoma_brucei_TREU927 | product=choline/ethanolamine kinase | location=Tb927_05_v4:388030-390006(+) | length=658	1	8	Tb927.5.1140	choline/ethanolamine kinase	8	23.1	73.294	658	0.91906	22.438	-0.121769
>GeneDB|Tb927.6.3650 | organism=Trypanosoma_brucei_TREU927 | product=ADP-ribosylation factor, putative | location=Tb927_06_v4:1087883-1088434(-) | length=183	1	11	Tb927.6.3650	ADP-ribosylation factor, putative	11	72.7	20.072	183	0.9191	19.954	-0.121706
>GeneDB|Tb927.10.12130 | organism=Trypanosoma_brucei_TREU927 | product=hypothetical protein, conserved | location=Tb927_10_v5:2956367-2958718(+) | length=783	1	7	Tb927.10.12130	hypothetical protein, conserved	7	17.4	87.529	783	0.91986	19.916	-0.120514
>GeneDB|Tb927.7.1060 | organism=Trypanosoma_brucei_TREU927 | product=hypothetical protein, conserved | location=Tb927_07_v4:270035-271519(+) | length=494	1	4	Tb927.7.1060	hypothetical protein, conserved	4	11.1	53.733	494	0.92005	36.041	-0.120216
>GeneDB|Tb09.211.2020 | organism=Trypanosoma_brucei_TREU927 | product=synaptojanin (N-terminal domain), putative | location=Tb927_09_v4:1619842-1622109(-) | length=755	1	3	Tb09.211.2020	synaptojanin (N-terminal domain), putative	3	3.8	83.045	755	0.92089	17.687	-0.118899
>GeneDB|Tb927.7.4170 | organism=Trypanosoma_brucei_TREU927 | product=fatty acid elongase, putative | location=Tb927_07_v4:1111707-1112522(+) | length=271	1	4	Tb927.7.4170	fatty acid elongase, putative	4	21.8	30.493	271	0.92113	18.347	-0.118523
>GeneDB|Tb11.02.4540 | organism=Trypanosoma_brucei_TREU927 | product=hypothetical protein, conserved,predicted tetratricopeptide repeat (TPR) protein | location=Tb927_11_01_v4:1868371-1869567(-) | length=398	1	7	Tb11.02.4540	hypothetical protein, conserved,predicted tetratricopeptide repeat (TPR) protein	7	19.8	45.205	398	0.92149	23.524	-0.11796
>GeneDB|Tb927.10.6360 | organism=Trypanosoma_brucei_TREU927 | product=hypothetical protein, conserved | location=Tb927_10_v5:1610579-1612042(-) | length=487	1	6	Tb927.10.6360	hypothetical protein, conserved	6	22.4	55.524	487	0.92152	28.436	-0.117913
>GeneDB|Tb11.01.1990 | organism=Trypanosoma_brucei_TREU927 | product=hypothetical protein, conserved | location=Tb927_11_01_v4:2681596-2682771(+) | length=391	1	1	Tb11.01.1990	hypothetical protein, conserved	1	2.8	43.954	391	0.92163	13.522	-0.11774
>GeneDB|Tb927.6.3780 | organism=Trypanosoma_brucei_TREU927 | product=hypothetical protein, conserved | location=Tb927_06_v4:1121448-1122887(-) | length=479	1	1	Tb927.6.3780	hypothetical protein, conserved	1	3.5	54.783	479	0.92195	8.8573	-0.11724
>GeneDB|Tb927.10.16110 | organism=Trypanosoma_brucei_TREU927 | product=hypothetical protein, conserved | location=Tb927_10_v5:3963160-3964320(+) | length=386	1	13	Tb927.10.16110	hypothetical protein, conserved	13	48.2	42.99	386	0.9221	24.948	-0.117005
>GeneDB|Tb927.4.2020 | organism=Trypanosoma_brucei_TREU927 | product=mu-adaptin 3, putative,adaptor complex AP-3 medium subunit, putative | location=Tb927_04_v4:508637-509917(-) | length=426	1	2	Tb927.4.2020	mu-adaptin 3, putative,adaptor complex AP-3 medium subunit, putative	2	5.2	47.994	426	0.92212	2.7995	-0.116974
>GeneDB|Tb927.10.15750 | organism=Trypanosoma_brucei_TREU927 | product=hypothetical protein, conserved | location=Tb927_10_v5:3889322-3894568(+) | length=1748	1	13	Tb927.10.15750	hypothetical protein, conserved	13	20.5	197.74	1748	0.92293	38.195	-0.115707
>GeneDB|Tb927.1.2330 | organism=Trypanosoma_brucei_TREU927 | product=beta tubulin | location=Tb927_01_v4:570482-571810(+) | length=442;>GeneDB|Tb927.1.2350 | organism=Trypanosoma_brucei_TREU927 | product=beta tubulin | location=Tb927_01_v4:574124-575452(+) | length=442;>GeneDB|Tb927.1.2370 | organism=Trypanosoma_brucei_TREU927 | product=beta tubulin | location=Tb927_01_v4:577766-579094(+) | lengt…	5	33;33;33;33;22	Tb927.1.2330	beta tubulin	33	84.8	49.704	442	0.92359	47.647	-0.114676
>GeneDB|Tb927.4.5200 | organism=Trypanosoma_brucei_TREU927 | product=nucleoporin (NUP54/57), putative | location=Tb927_04_v4:1418459-1420384(-) | length=641	1	4	Tb927.4.5200	nucleoporin (NUP54/57), putative	4	10	62.475	641	0.92362	21.116	-0.114629
>GeneDB|Tb09.160.0810 | organism=Trypanosoma_brucei_TREU927 | product=kynureninase, putative | location=Tb927_09_v4:443780-445171(-) | length=435	1	13	Tb09.160.0810	kynureninase, putative	13	38.6	47.719	435	0.92397	50.758	-0.114082
>GeneDB|Tb11.02.0840 | organism=Trypanosoma_brucei_TREU927 | product=RNA-binding protein, putative | location=Tb927_11_01_v4:957024-957776(+) | length=250	1	3	Tb11.02.0840	RNA-binding protein, putative	3	21.2	26.602	250	0.92415	2.1849	-0.113801
>GeneDB|Tb11.02.5760 | organism=Trypanosoma_brucei_TREU927 | product=hypothetical protein, conserved,zinc finger protein family member, putative | location=Tb927_11_01_v4:2175148-2176437(-) | length=429	1	6	Tb11.02.5760	hypothetical protein, conserved,zinc finger protein family member, putative	6	21.7	48.18	429	0.92432	14.522	-0.113536
>GeneDB|Tb927.6.4680 | organism=Trypanosoma_brucei_TREU927 | product=hypothetical protein, conserved | location=Tb927_06_v4:1305230-1306084(+) | length=284	1	2	Tb927.6.4680	hypothetical protein, conserved	2	12.3	31.909	284	0.92475	20.941	-0.112865
>GeneDB|Tb11.01.4080 | organism=Trypanosoma_brucei_TREU927 | product=hypothetical protein, conserved | location=Tb927_11_01_v4:3211721-3213583(+) | length=620	1	2	Tb11.01.4080	hypothetical protein, conserved	2	4.8	66.8	620	0.92535	168.04	-0.111929
>GeneDB|Tb09.211.3050 | organism=Trypanosoma_brucei_TREU927 | product=hypothetical protein, conserved | location=Tb927_09_v4:1816074-1816457(+) | length=127	1	3	Tb09.211.3050	hypothetical protein, conserved	3	29.1	14.045	127	0.92607	17.343	-0.110807
>GeneDB|Tb927.1.330 | organism=Trypanosoma_brucei_TREU927 | product=retrotransposon hot spot protein (RHS, pseudogene), putative | location=Tb927_01_v4:131092-131943(-) | length=284	1	1	Tb927.1.330	retrotransposon hot spot protein (RHS, pseudogene), putative	1	6.7	30.257	284	0.92727	28.535	-0.108939
>GeneDB|Tb11.01.7130 | organism=Trypanosoma_brucei_TREU927 | product=Tb-291 membrane associated protein, putative,membrane associated protein, putative | location=Tb927_11_01_v4:4056278-4058434(-) | length=718;>REV_GeneDB|Tb927.7.7400 Reverse sequence, was | organism=Trypanosoma_brucei_TREU927 | product=hypothetical protein, conserved | location=Tb927_07_v4:2123779-2130372(-) | length=2197;>REV_G…	3	4;0;0	Tb11.01.7130	Tb-291 membrane associated protein, putative,membrane associated protein, putative	4	8.2	82.785	718	0.92735	49.304	-0.108814
>GeneDB|Tb11.01.7080 | organism=Trypanosoma_brucei_TREU927 | product=U5 small nuclear ribonucleoprotein component, putative,U5 snrnp-specific protein, putative | location=Tb927_11_01_v4:4038059-4040983(-) | length=974	1	12	Tb11.01.7080	U5 small nuclear ribonucleoprotein component, putative,U5 snrnp-specific protein, putative	12	18.3	105.47	974	0.92752	43.049	-0.10855
>GeneDB|Tb927.7.4890 | organism=Trypanosoma_brucei_TREU927 | product=hypothetical protein, conserved | location=Tb927_07_v4:1283525-1286086(-) | length=853	1	1	Tb927.7.4890	hypothetical protein, conserved	1	1.4	92.655	853	0.92792	12.951	-0.107928
>GeneDB|Tb927.10.3990 | organism=Trypanosoma_brucei_TREU927 | product=DHH1 | location=Tb927_10_v5:1056282-1057502(-) | length=406	1	40	Tb927.10.3990	DHH1	40	82.5	46.468	406	0.92795	39.917	-0.107881
>GeneDB|Tb927.6.4340 | organism=Trypanosoma_brucei_TREU927 | product=U6 snRNA-associated Sm-like protein LSm5p | location=Tb927_06_v4:1226326-1226679(-) | length=117	1	4	Tb927.6.4340	U6 snRNA-associated Sm-like protein LSm5p	4	49.6	12.791	117	0.9282	16.92	-0.107492
>GeneDB|Tb927.7.7320 | organism=Trypanosoma_brucei_TREU927 | product=hypothetical protein, conserved | location=Tb927_07_v4:2112906-2115062(-) | length=718	1	3	Tb927.7.7320	hypothetical protein, conserved	3	3.1	80.512	718	0.92927	20.83	-0.10583
>GeneDB|Tb927.10.1450 | organism=Trypanosoma_brucei_TREU927 | product=hypothetical protein, conserved | location=Tb927_10_v5:377887-386505(-) | length=2872	1	10	Tb927.10.1450	hypothetical protein, conserved	10	40.4	329.64	2872	0.92928	31.944	-0.105815
>GeneDB|Tb11.02.3290 | organism=Trypanosoma_brucei_TREU927 | product=hypothetical protein, conserved | location=Tb927_11_01_v4:1558622-1560871(+) | length=749	1	2	Tb11.02.3290	hypothetical protein, conserved	2	4.3	82.5	749	0.92959	34.315	-0.105334
>GeneDB|Tb927.2.2370 | organism=Trypanosoma_brucei_TREU927 | product=hypothetical protein, conserved | location=Tb927_02_v4:461056-465255(-) | length=1399	1	1	Tb927.2.2370	hypothetical protein, conserved	1	0.7	151.54	1399	0.92982	1.2836	-0.104977
>GeneDB|Tb927.10.8140 | organism=Trypanosoma_brucei_TREU927 | product=hypothetical protein, conserved | location=Tb927_10_v5:2024787-2025272(-) | length=161	1	2	Tb927.10.8140	hypothetical protein, conserved	2	14.3	18.489	161	0.9308	9.5201	-0.103457
>GeneDB|Tb11.47.0027 | organism=Trypanosoma_brucei_TREU927 | product=hypothetical protein, conserved | location=Tb927_11_01_v4:347167-349509(+) | length=780	1	2	Tb11.47.0027	hypothetical protein, conserved	2	4.6	88.346	780	0.9311	27.039	-0.102992
>GeneDB|Tb927.6.2130 | organism=Trypanosoma_brucei_TREU927 | product=nuclear movement protein, putative,NUDC-like protein | location=Tb927_06_v4:681683-682210(-) | length=175	1	3	Tb927.6.2130	nuclear movement protein, putative,NUDC-like protein	3	15.4	19.667	175	0.93112	18.94	-0.102961
>GeneDB|Tb927.10.15210 | organism=Trypanosoma_brucei_TREU927 | product=nuclear cap binding complex subunit CBP30 | location=Tb927_10_v5:3708384-3709196(+) | length=270	1	3	Tb927.10.15210	nuclear cap binding complex subunit CBP30	3	21.5	30.191	270	0.93189	19.866	-0.101768
>GeneDB|Tb927.10.15720 | organism=Trypanosoma_brucei_TREU927 | product=proteasome regulatory non-ATP-ase subunit 9,19S proteasome regulatory subunit | location=Tb927_10_v5:3869048-3870265(+) | length=405	1	16	Tb927.10.15720	proteasome regulatory non-ATP-ase subunit 9,19S proteasome regulatory subunit	16	54.3	45.989	405	0.93224	21.732	-0.101227
>GeneDB|Tb927.10.9330 | organism=Trypanosoma_brucei_TREU927 | product=hypothetical protein, conserved | location=Tb927_10_v5:2309655-2311466(+) | length=603	1	7	Tb927.10.9330	hypothetical protein, conserved	7	20.7	66.031	603	0.93248	23.863	-0.100855
>GeneDB|Tb11.02.2760 | organism=Trypanosoma_brucei_TREU927 | product=hypothetical protein, conserved | location=Tb927_11_01_v4:1433383-1436283(+) | length=966	1	4	Tb11.02.2760	hypothetical protein, conserved	4	9.3	104.95	966	0.93324	35.111	-0.09968
[truncated: 2,148 more rows]
